# Supplementary material for: Membrane filtration device for studying compression of fouling layers in membrane bioreactors
Source: PLoS One. 2017 Jul 27;12(7):e0181652. doi: 10.1371/journal.pone.0181652 (PMC5531554; doi:10.1371/journal.pone.0181652)
Supplement: S1 Data — (XLSX) [file pone.0181652.s001.xlsx]

## Sheet: Sludge characteristics
	Sludge characteristics Aalborg West WWTP
		Aalborg West sludge
		15 min	60 min (1)	60 min (2)	60 min (3)
	TSS (g×L-1)	7.78 ±0.14	8.09 ±0.60	7.77 ±0.19	7.67 ±0.13
	pH	7.18	7.22	7.26	7.20
	Conductivity (µS×cm-1)	1175	1115	1104	1273
	Mean floc size (µm)	34.1	31.0	31.2	29.6
		CST	[sek]				Residual turbidity					SS - tray w filter			SS dry			Tørstof	pH	Conductivity [uS/cm]
		1	2	3			1	2	3	std	Average	1	2	3	1	2	3	[g/L]
	60 min (1)	48.8	45.5	44.5	2.25019	46.2667	0.104	0.106	0.122	0.00986577	0.110667	3.2663	3.2928	3.2848	3.3102	3.3312	3.3239	8.09333	7.22	7.26
	60 min (2)	52.2	51.5	54.2	1.40119	52.6333	0.072	0.058	0.102	0.0224796	0.0773333	3.2884	3.2746	3.276	3.3266	3.313	3.3159	7.76667	7.261	1104
	60 min (3)	53.4	49.1	45.7	3.85876	49.4	0.101	0.067	0.108	0.0219317	0.092	3.2906	3.2743	3.2847	3.3284	3.3134	3.3229	7.67333	7.197	1273
	15 min	40.7	52.6	47.8	5.98693	47.0333	0.101	0.077	0.078	0.0135769	0.0853333	3.299	3.3116	3.3017	3.3387	3.3499	3.3404	7.78	7.177	1175
	Sludge characteristics remaining WWTPs
	Plant	Aalborg Vest CAS	Bjerringbro MBR	Bjerringbro CAS	Lundtofte MBR	Lundtofte CAS
	TSS (g×L-1)	2.70	11.3	5.02	9.8	7.37
	pH	6.80	6.78	7.29	7.28	7.22
	Conductivity (μS×cm-1)	692	713	697	1111	1013
	CST/TSS (s×L×g-1)	4.20	8.11	2.46	3.62	2.86
	Residual Turbidity (-)	0.019	0.190	0.006	0.032	0.026
	Mean floc size (μm)	70.6	62.5	100.2	43.5	46.9

## Sheet: Flux data AaV 1
TMP (Pa)	Time (s)	weight	J measured (LMH)	ω (kg/m2)	α (eq)	α	Rc model (1/m)	Jmodel (m/s)	Jmodel (LMH)		TMP (Pa)	Time (s)	weight	J measured (LMH)	ω (kg/m2)	α (eq)	α	Rc model (1/m)	Jmodel (m/s)	Jmodel (LMH)			TMP (Pa)	Time (s)	weight	J measured (LMH)	ω (kg/m2)	α (eq)	α	Rc model (1/m)	Jmodel (m/s)	Jmodel (LMH)		TMP (Pa)	Time (s)	weight	J measured (LMH)	ω (kg/m2)	α (eq)	α	Rc model (1/m)	Jmodel (m/s)	Jmodel (LMH)		TMP (Pa)	Time (s)	weight	J measured (LMH)	ω (kg/m2)
1000	1	98.205	29.625	0	1.32117e+11	1.32117e+11	0	6.98324e-06	25.1397		1500	1	303.544	45.3143	0	1.54245e+11	1.54245e+11	0	1.04749e-05	37.7095			1950	1	610.655	59.4857	0	1.74161e+11	1.74161e+11	0	1.36173e-05	49.0223		2450	1	1015.36	67.8429	0	1.9629e+11	1.9629e+11	0	1.71089e-05	61.5922		2950	1	1477.55	85.0571	0
1000	11	99.125	30.2786	0.000564944	1.32117e+11	1.32117e+11	7.46385e+07	6.97998e-06	25.1279		1500	11	304.628	44.3786	0.000847416	1.54245e+11	1.54245e+11	1.3071e+08	1.04663e-05	37.6787			1950	11	612.007	50.7857	0.00110164	1.74161e+11	1.74161e+11	1.91863e+08	1.3601e-05	48.9636		2450	11	1016.94	67.2107	0.00138411	1.9629e+11	1.9629e+11	2.71688e+08	1.70799e-05	61.4878		2950	11	1479.34	82.275	0.00166659
1000	21	99.681	30.3	0.00111682	1.32117e+11	1.32117e+11	1.4755e+08	6.97681e-06	25.1165		1500	21	305.566	42.7714	0.00167498	1.54245e+11	1.54245e+11	2.58358e+08	1.0458e-05	37.6487			1950	21	613.268	54.4371	0.00217712	1.74161e+11	1.74161e+11	3.7917e+08	1.35851e-05	48.9064		2450	21	1018.34	66.5486	0.00273475	1.9629e+11	1.9629e+11	5.36806e+08	1.70517e-05	61.3862		2950	21	1481.36	80.0571	0.00329201
1000	31	100.264	29.2543	0.00165606	1.32117e+11	1.32117e+11	2.18793e+08	6.9737e-06	25.1053		1500	31	306.536	41.4257	0.00248347	1.54245e+11	1.54245e+11	3.83064e+08	1.04498e-05	37.6194			1950	31	614.21	50.3829	0.00322758	1.74161e+11	1.74161e+11	5.6212e+08	1.35696e-05	48.8507		2450	31	1019.86	63.1886	0.00405356	1.9629e+11	1.9629e+11	7.95674e+08	1.70243e-05	61.2874		2950	31	1483.09	75.1629	0.0048785
1000	41	100.973	26.1343	0.00218309	1.32117e+11	1.32117e+11	2.88422e+08	6.97067e-06	25.0944		1500	41	307.384	38.94	0.00327362	1.54245e+11	1.54245e+11	5.04941e+08	1.04419e-05	37.5909			1950	41	615.455	50.9314	0.0042541	1.74161e+11	1.74161e+11	7.409e+08	1.35546e-05	48.7964		2450	41	1021.35	62.1771	0.00534204	1.9629e+11	1.9629e+11	1.04859e+09	1.69975e-05	61.1912		2950	41	1484.75	75.4629	0.00642808
1000	51	101.618	26.1086	0.00269831	1.32117e+11	1.32117e+11	3.56491e+08	6.96772e-06	25.0838		1500	51	308.377	38.46	0.00404612	1.54245e+11	1.54245e+11	6.24096e+08	1.04342e-05	37.563			1950	51	616.533	50.3486	0.00525767	1.74161e+11	1.74161e+11	9.15684e+08	1.35398e-05	48.7434		2450	51	1022.74	61.3029	0.00660162	1.9629e+11	1.9629e+11	1.29583e+09	1.69715e-05	61.0974		2950	51	1486.32	73.5771	0.00794263
1000	61	102.174	26.8371	0.0032021	1.32117e+11	1.32117e+11	4.23051e+08	6.96482e-06	25.0734		1500	61	309.171	37.8257	0.00480162	1.54245e+11	1.54245e+11	7.40629e+08	1.04266e-05	37.5357			1950	61	617.949	52.2257	0.00623925	1.74161e+11	1.74161e+11	1.08664e+09	1.35255e-05	48.6917		2450	61	1024.2	60.8229	0.0078336	1.9629e+11	1.9629e+11	1.53766e+09	1.69461e-05	61.0059		2950	61	1488.14	73.5771	0.00942389
1000	71	102.727	25.8429	0.00369484	1.32117e+11	1.32117e+11	4.88149e+08	6.962e-06	25.0632		1500	71	310.053	37.8429	0.00554074	1.54245e+11	1.54245e+11	8.54635e+08	1.04192e-05	37.5091			1950	71	619.142	50.9229	0.00719972	1.74161e+11	1.74161e+11	1.25391e+09	1.35114e-05	48.6411		2450	71	1025.49	60.9429	0.00903922	1.9629e+11	1.9629e+11	1.77431e+09	1.69213e-05	60.9166		2950	71	1489.95	73.9543	0.0108735
1000	81	103.395	25.3929	0.00417685	1.32117e+11	1.32117e+11	5.51831e+08	6.95924e-06	25.0533		1500	81	310.949	36.2229	0.00626407	1.54245e+11	1.54245e+11	9.66205e+08	1.0412e-05	37.4831			1950	81	620.303	50.4771	0.0081399	1.74161e+11	1.74161e+11	1.41766e+09	1.34977e-05	48.5918		2450	81	1026.96	61.8686	0.0102196	1.9629e+11	1.9629e+11	2.00601e+09	1.68971e-05	60.8295		2950	81	1491.67	75.0514	0.0122929
1000	91	103.988	25.8214	0.00464849	1.32117e+11	1.32117e+11	6.14142e+08	6.95654e-06	25.0435		1500	91	311.799	36.6257	0.00697216	1.54245e+11	1.54245e+11	1.07542e+09	1.04049e-05	37.4577			1950	91	621.396	48.4457	0.00906059	1.74161e+11	1.74161e+11	1.57801e+09	1.34843e-05	48.5436		2450	91	1028.46	61.4914	0.0113758	1.9629e+11	1.9629e+11	2.23297e+09	1.68735e-05	60.7444		2950	91	1493.38	74.5029	0.0136834
1000	101	104.405	26.1857	0.00511006	1.32117e+11	1.32117e+11	6.75123e+08	6.9539e-06	25.034		1500	101	312.603	37.1057	0.00766553	1.54245e+11	1.54245e+11	1.18237e+09	1.0398e-05	37.4329			1950	101	622.422	48.6771	0.00996252	1.74161e+11	1.74161e+11	1.73509e+09	1.34712e-05	48.4964		2450	101	1029.95	62.6057	0.0125089	1.9629e+11	1.9629e+11	2.45538e+09	1.68504e-05	60.6613		2950	101	1495.07	74.28	0.0150465
1000	111	105.001	25.2321	0.00556187	1.32117e+11	1.32117e+11	7.34815e+08	6.95132e-06	25.0247		1500	111	313.444	37.5514	0.00834469	1.54245e+11	1.54245e+11	1.28713e+09	1.03913e-05	37.4086			1950	111	623.601	48.8486	0.0108464	1.74161e+11	1.74161e+11	1.88902e+09	1.34584e-05	48.4503		2450	111	1031.37	62.2457	0.0136198	1.9629e+11	1.9629e+11	2.67343e+09	1.68278e-05	60.58		2950	111	1496.84	74.46	0.0163833
1000	121	105.588	24.2464	0.00600421	1.32117e+11	1.32117e+11	7.93256e+08	6.94879e-06	25.0156		1500	121	314.382	38.2114	0.0090101	1.54245e+11	1.54245e+11	1.38977e+09	1.03847e-05	37.3848			1950	121	624.821	49.4314	0.0117128	1.74161e+11	1.74161e+11	2.03993e+09	1.34459e-05	48.4052		2450	121	1032.79	62.1086	0.0147093	1.9629e+11	1.9629e+11	2.88729e+09	1.68057e-05	60.5004		2950	121	1498.61	74.7514	0.0176949
1000	131	106.167	24.0857	0.00643737	1.32117e+11	1.32117e+11	8.50483e+08	6.94632e-06	25.0067		1500	131	315.33	39.4371	0.00966223	1.54245e+11	1.54245e+11	1.49035e+09	1.03782e-05	37.3615			1950	131	626.002	50.3829	0.0125625	1.74161e+11	1.74161e+11	2.18791e+09	1.34336e-05	48.361		2450	131	1034.22	61.8	0.0157783	1.9629e+11	1.9629e+11	3.09713e+09	1.6784e-05	60.4226		2950	131	1500.36	75.2057	0.0189824
1000	141	106.668	23.7214	0.0068616	1.32117e+11	1.32117e+11	9.06531e+08	6.9439e-06	24.998		1500	141	316.257	40.1914	0.0103015	1.54245e+11	1.54245e+11	1.58896e+09	1.03719e-05	37.3387			1950	141	627.163	50.2971	0.013396	1.74161e+11	1.74161e+11	2.33307e+09	1.34216e-05	48.3178		2450	141	1035.71	62.5457	0.0168276	1.9629e+11	1.9629e+11	3.3031e+09	1.67629e-05	60.3464		2950	141	1502.1	74.9486	0.0202467
1000	151	107.215	23.2286	0.00727717	1.32117e+11	1.32117e+11	9.61435e+08	6.94153e-06	24.9895		1500	151	317.204	40.0629	0.0109283	1.54245e+11	1.54245e+11	1.68564e+09	1.03657e-05	37.3164			1950	151	628.3	49.6543	0.0142139	1.74161e+11	1.74161e+11	2.47551e+09	1.34098e-05	48.2754		2450	151	1037.16	62.4857	0.0178579	1.9629e+11	1.9629e+11	3.50534e+09	1.67421e-05	60.2717		2950	151	1503.85	74.6143	0.0214889
1000	161	108.156	23.4429	0.00768432	1.32117e+11	1.32117e+11	1.01523e+09	6.93921e-06	24.9812		1500	161	318.133	40.2686	0.0115431	1.54245e+11	1.54245e+11	1.78046e+09	1.03596e-05	37.2945			1950	161	629.469	50.1	0.0150166	1.74161e+11	1.74161e+11	2.61532e+09	1.33983e-05	48.2339		2450	161	1038.67	62.7771	0.01887	1.9629e+11	1.9629e+11	3.70399e+09	1.67218e-05	60.1986		2950	161	1505.58	74.3486	0.0227097
1000	171	108.697	24.3321	0.00808329	1.32117e+11	1.32117e+11	1.06794e+09	6.93694e-06	24.973		1500	171	319.056	39.7114	0.0121461	1.54245e+11	1.54245e+11	1.87349e+09	1.03536e-05	37.2731			1950	171	630.614	50.1343	0.0158048	1.74161e+11	1.74161e+11	2.75259e+09	1.3387e-05	48.1932		2450	171	1040.08	62.6486	0.0198644	1.9629e+11	1.9629e+11	3.89919e+09	1.67019e-05	60.1269		2950	171	1507.32	73.9971	0.02391
1000	181	109.296	25.5214	0.00847431	1.32117e+11	1.32117e+11	1.1196e+09	6.93471e-06	24.965		1500	181	320.028	38.9143	0.0127379	1.54245e+11	1.54245e+11	1.96476e+09	1.03478e-05	37.2521			1950	181	631.847	50.1771	0.0165788	1.74161e+11	1.74161e+11	2.88739e+09	1.33759e-05	48.1534		2450	181	1041.54	62.6657	0.0208418	1.9629e+11	1.9629e+11	4.09104e+09	1.66824e-05	60.0566		2950	181	1509.03	73.6457	0.0250906
1000	191	109.88	24.7886	0.00885759	1.32117e+11	1.32117e+11	1.17023e+09	6.93254e-06	24.9571		1500	191	320.89	39.1543	0.0133186	1.54245e+11	1.54245e+11	2.05433e+09	1.03421e-05	37.2315			1950	191	633.012	50.3914	0.0173392	1.74161e+11	1.74161e+11	3.01982e+09	1.33651e-05	48.1142		2450	191	1043.02	62.1086	0.0218028	1.9629e+11	1.9629e+11	4.27967e+09	1.66632e-05	59.9876		2950	191	1510.73	73.2257	0.0262521
1000	201	110.538	24.8314	0.00923335	1.32117e+11	1.32117e+11	1.21988e+09	6.9304e-06	24.9494		1500	201	321.744	38.6229	0.0138887	1.54245e+11	1.54245e+11	2.14227e+09	1.03365e-05	37.2113			1950	201	634.154	50.6229	0.0180864	1.74161e+11	1.74161e+11	3.14995e+09	1.33544e-05	48.0759		2450	201	1044.48	62.1429	0.0227479	1.9629e+11	1.9629e+11	4.4652e+09	1.66444e-05	59.92		2950	201	1512.44	73.0286	0.0273954
1000	211	111.048	24.2657	0.00960178	1.32117e+11	1.32117e+11	1.26855e+09	6.92831e-06	24.9419		1500	211	322.701	37.7486	0.0144484	1.54245e+11	1.54245e+11	2.2286e+09	1.0331e-05	37.1915			1950	211	635.348	49.7657	0.0188207	1.74161e+11	1.74161e+11	3.27784e+09	1.33439e-05	48.0382		2450	211	1045.91	62.1	0.0236777	1.9629e+11	1.9629e+11	4.64771e+09	1.6626e-05	59.8535		2950	211	1514.12	72.9107	0.0285209
1000	221	111.594	23.1857	0.00996309	1.32117e+11	1.32117e+11	1.31629e+09	6.92626e-06	24.9345		1500	221	323.562	38.2029	0.0149981	1.54245e+11	1.54245e+11	2.31338e+09	1.03256e-05	37.172			1950	221	636.52	49.9286	0.0195426	1.74161e+11	1.74161e+11	3.40357e+09	1.33337e-05	48.0012		2450	221	1047.33	61.5429	0.0245927	1.9629e+11	1.9629e+11	4.82731e+09	1.66079e-05	59.7883		2950	221	1515.84	73.3607	0.0296295
1000	231	112.127	22.7914	0.0103175	1.32117e+11	1.32117e+11	1.36311e+09	6.92425e-06	24.9273		1500	231	324.432	38.7343	0.015538	1.54245e+11	1.54245e+11	2.39666e+09	1.03203e-05	37.153			1950	231	637.653	50.3657	0.0202525	1.74161e+11	1.74161e+11	3.5272e+09	1.33236e-05	47.965		2450	231	1048.79	61.4229	0.0254934	1.9629e+11	1.9629e+11	5.0041e+09	1.65901e-05	59.7243		2950	231	1510.88	72.7071	0.0307216
1000	241	112.585	23.3657	0.0106651	1.32117e+11	1.32117e+11	1.40903e+09	6.92228e-06	24.9202		1500	241	325.347	38.4257	0.0160683	1.54245e+11	1.54245e+11	2.47847e+09	1.03151e-05	37.1343			1950	241	638.837	50.2971	0.0209507	1.74161e+11	1.74161e+11	3.6488e+09	1.33137e-05	47.9293		2450	241	1050.2	61.4229	0.0263801	1.9629e+11	1.9629e+11	5.17817e+09	1.65726e-05	59.6613		2950	241	1512.62	73.125	0.0317977
1000	251	113.197	23.94	0.0110061	1.32117e+11	1.32117e+11	1.45409e+09	6.92035e-06	24.9133		1500	251	326.263	38.8971	0.0165895	1.54245e+11	1.54245e+11	2.55885e+09	1.031e-05	37.1159			1950	251	640.03	50.1514	0.0216375	1.74161e+11	1.74161e+11	3.76842e+09	1.3304e-05	47.8943		2450	251	1051.64	61.5257	0.0272535	1.9629e+11	1.9629e+11	5.34959e+09	1.65554e-05	59.5995		2950	251	1514.27	72.7286	0.0328585
1000	261	113.774	24.6429	0.0113407	1.32117e+11	1.32117e+11	1.49829e+09	6.91845e-06	24.9064		1500	261	327.184	38.9829	0.0171017	1.54245e+11	1.54245e+11	2.63785e+09	1.0305e-05	37.0979			1950	261	641.216	50.0743	0.0223133	1.74161e+11	1.74161e+11	3.88612e+09	1.32944e-05	47.8599		2450	261	1053.08	61.3179	0.0281137	1.9629e+11	1.9629e+11	5.51846e+09	1.65385e-05	59.5387		2950	261	1515.99	71.88	0.0339044
1000	271	114.387	25.4657	0.011669	1.32117e+11	1.32117e+11	1.54167e+09	6.9166e-06	24.8997		1500	271	328.1	39.0429	0.0176051	1.54245e+11	1.54245e+11	2.71551e+09	1.03e-05	37.0802			1950	271	642.371	49.8171	0.0229784	1.74161e+11	1.74161e+11	4.00195e+09	1.3285e-05	47.8261		2450	271	1054.51	61.7786	0.0289614	1.9629e+11	1.9629e+11	5.68484e+09	1.65219e-05	59.4789		2950	271	1517.67	72.1886	0.0349359
1000	281	115.002	25.4743	0.0119913	1.32117e+11	1.32117e+11	1.58425e+09	6.91477e-06	24.8932		1500	281	328.98	38.8286	0.0181	1.54245e+11	1.54245e+11	2.79184e+09	1.02952e-05	37.0628			1950	281	643.495	49.3543	0.0236331	1.74161e+11	1.74161e+11	4.11598e+09	1.32758e-05	47.7929		2450	281	1050.6	61.2857	0.0297968	1.9629e+11	1.9629e+11	5.84882e+09	1.65056e-05	59.4201		2950	281	1519.27	72.1029	0.0359534
1000	291	115.556	25.4143	0.0123076	1.32117e+11	1.32117e+11	1.62604e+09	6.91299e-06	24.8867		1500	291	329.902	38.4429	0.0185866	1.54245e+11	1.54245e+11	2.8669e+09	1.02905e-05	37.0457			1950	291	644.649	48.7114	0.0242777	1.74161e+11	1.74161e+11	4.22824e+09	1.32667e-05	47.7602		2450	291	1052.05	60.7714	0.0306202	1.9629e+11	1.9629e+11	6.01046e+09	1.64895e-05	59.3622		2950	291	1521.04	71.0571	0.0369574
1000	301	116.169	24.9686	0.0126181	1.32117e+11	1.32117e+11	1.66706e+09	6.91123e-06	24.8804		1500	301	330.793	38.5714	0.0190652	1.54245e+11	1.54245e+11	2.94072e+09	1.02858e-05	37.0289			1950	301	645.788	49.0543	0.0249125	1.74161e+11	1.74161e+11	4.3388e+09	1.32578e-05	47.7281		2450	301	1053.45	60.3964	0.0314321	1.9629e+11	1.9629e+11	6.16983e+09	1.64737e-05	59.3053		2950	301	1522.68	69.2829	0.0379483
1000	311	116.739	24.78	0.0129229	1.32117e+11	1.32117e+11	1.70734e+09	6.90951e-06	24.8742		1500	311	331.669	38.9057	0.0195359	1.54245e+11	1.54245e+11	3.01332e+09	1.02812e-05	37.0124			1950	311	646.899	48.8143	0.0255377	1.74161e+11	1.74161e+11	4.44768e+09	1.3249e-05	47.6965		2450	311	1054.84	60.0343	0.0322328	1.9629e+11	1.9629e+11	6.32699e+09	1.64581e-05	59.2492		2950	311	1524.28	68.8886	0.0389264
1000	321	117.3	25.0543	0.0132223	1.32117e+11	1.32117e+11	1.74688e+09	6.90782e-06	24.8682		1500	321	332.6	38.5543	0.0199989	1.54245e+11	1.54245e+11	3.08474e+09	1.02767e-05	36.9962			1950	321	648.094	48.6536	0.0261535	1.74161e+11	1.74161e+11	4.55494e+09	1.32404e-05	47.6654		2450	321	1056.23	58.6114	0.0330226	1.9629e+11	1.9629e+11	6.48201e+09	1.64428e-05	59.1941		2950	321	1525.75	68.2714	0.0398923
1000	331	117.893	24.7029	0.0135162	1.32117e+11	1.32117e+11	1.78571e+09	6.90616e-06	24.8622		1500	331	333.519	38.8629	0.0204545	1.54245e+11	1.54245e+11	3.15501e+09	1.02723e-05	36.9803			1950	331	649.19	48.1179	0.0267603	1.74161e+11	1.74161e+11	4.66062e+09	1.32319e-05	47.6348		2450	331	1057.6	56.94	0.0338017	1.9629e+11	1.9629e+11	6.63495e+09	1.64277e-05	59.1397		2950	331	1527.3	68.22	0.0408461
1000	341	118.479	24.7371	0.0138049	1.32117e+11	1.32117e+11	1.82385e+09	6.90453e-06	24.8563		1500	341	334.4	38.7771	0.0209027	1.54245e+11	1.54245e+11	3.22415e+09	1.0268e-05	36.9646			1950	341	647.016	49.3071	0.0273583	1.74161e+11	1.74161e+11	4.76476e+09	1.32235e-05	47.6047		2450	341	1058.88	59.4257	0.0345705	1.9629e+11	1.9629e+11	6.78586e+09	1.64128e-05	59.0862		2950	341	1529.01	68.0914	0.0417883
1000	351	119.051	24.9343	0.0140884	1.32117e+11	1.32117e+11	1.86131e+09	6.90294e-06	24.8506		1500	351	335.327	38.46	0.0213439	1.54245e+11	1.54245e+11	3.29219e+09	1.02637e-05	36.9492			1950	351	648.105	48.5143	0.0279477	1.74161e+11	1.74161e+11	4.86741e+09	1.32153e-05	47.5751		2450	351	1060.09	59.5371	0.0353293	1.9629e+11	1.9629e+11	6.9348e+09	1.63982e-05	59.0335		2950	351	1530.64	69.18	0.0427191
1000	361	119.625	25.3457	0.0143669	1.32117e+11	1.32117e+11	1.89811e+09	6.90137e-06	24.8449		1500	361	336.193	38.2457	0.0217781	1.54245e+11	1.54245e+11	3.35917e+09	1.02595e-05	36.9341			1950	361	649.327	47.85	0.0285286	1.74161e+11	1.74161e+11	4.96859e+09	1.32072e-05	47.5459		2450	361	1061.77	58.9114	0.0360783	1.9629e+11	1.9629e+11	7.08182e+09	1.63838e-05	58.9816		2950	361	1532.22	69.84	0.0436389
1000	371	120.209	25.3543	0.0146405	1.32117e+11	1.32117e+11	1.93425e+09	6.89983e-06	24.8394		1500	371	337.087	38.0057	0.0222055	1.54245e+11	1.54245e+11	3.4251e+09	1.02553e-05	36.9192			1950	371	650.448	47.3743	0.0291014	1.74161e+11	1.74161e+11	5.06834e+09	1.31992e-05	47.5171		2450	371	1063.18	58.2514	0.0368177	1.9629e+11	1.9629e+11	7.22696e+09	1.63696e-05	58.9304		2950	371	1533.82	69.5229	0.0445481
1000	381	120.85	25.3114	0.0149093	1.32117e+11	1.32117e+11	1.96977e+09	6.89831e-06	24.8339		1500	381	337.981	37.74	0.0226263	1.54245e+11	1.54245e+11	3.49001e+09	1.02513e-05	36.9045			1950	381	651.482	48.54	0.0296662	1.74161e+11	1.74161e+11	5.1667e+09	1.31913e-05	47.4888		2450	381	1064.47	58.8686	0.0375479	1.9629e+11	1.9629e+11	7.37029e+09	1.63555e-05	58.8799		2950	381	1535.45	70.0029	0.0454468
1000	391	121.437	25.7486	0.0151734	1.32117e+11	1.32117e+11	2.00466e+09	6.89683e-06	24.8286		1500	391	338.834	37.8171	0.0230407	1.54245e+11	1.54245e+11	3.55393e+09	1.02472e-05	36.8901			1950	391	652.543	47.3143	0.0302232	1.74161e+11	1.74161e+11	5.26371e+09	1.31836e-05	47.461		2450	391	1065.68	56.9657	0.038269	1.9629e+11	1.9629e+11	7.51183e+09	1.63417e-05	58.8302		2950	391	1537.12	70.2086	0.0463353
1000	401	122.004	25.8257	0.015433	1.32117e+11	1.32117e+11	2.03895e+09	6.89537e-06	24.8233		1500	401	339.73	37.8857	0.0234488	1.54245e+11	1.54245e+11	3.61687e+09	1.02433e-05	36.8759			1950	401	653.768	46.7314	0.0307725	1.74161e+11	1.74161e+11	5.35939e+09	1.3176e-05	47.4335		2450	401	1066.96	56.9229	0.0389813	1.9629e+11	1.9629e+11	7.65165e+09	1.63281e-05	58.7811		2950	401	1538.8	70.62	0.047214
1000	411	122.629	25.6371	0.015688	1.32117e+11	1.32117e+11	2.07265e+09	6.89394e-06	24.8182		1500	411	340.605	37.5943	0.0238507	1.54245e+11	1.54245e+11	3.67886e+09	1.02394e-05	36.8619			1950	411	654.847	48.9943	0.0313145	1.74161e+11	1.74161e+11	5.45378e+09	1.31685e-05	47.4064		2450	411	1068.42	57.4714	0.039685	1.9629e+11	1.9629e+11	7.78978e+09	1.63146e-05	58.7327		2950	411	1540.42	70.8857	0.0480831
1000	421	123.222	25.2514	0.0159387	1.32117e+11	1.32117e+11	2.10577e+09	6.89253e-06	24.8131		1500	421	341.507	38.34	0.0242465	1.54245e+11	1.54245e+11	3.73992e+09	1.02356e-05	36.8482			1950	421	655.9	49.7657	0.0318492	1.74161e+11	1.74161e+11	5.54691e+09	1.3161e-05	47.3798		2450	421	1069.82	58.68	0.0403803	1.9629e+11	1.9629e+11	7.92626e+09	1.63014e-05	58.685		2950	421	1542.06	70.7057	0.0489427
1000	431	123.841	25.2771	0.0161852	1.32117e+11	1.32117e+11	2.13833e+09	6.89114e-06	24.8081		1500	431	342.367	27.8457	0.0246365	1.54245e+11	1.54245e+11	3.80007e+09	1.02318e-05	36.8347			1950	431	657.198	48.9771	0.0323768	1.74161e+11	1.74161e+11	5.6388e+09	1.31537e-05	47.3535		2450	431	1071.18	59.2029	0.0410674	1.9629e+11	1.9629e+11	8.06113e+09	1.62883e-05	58.6379		2950	431	1543.72	70.7057	0.0497933
1000	441	124.383	25.5086	0.0164274	1.32117e+11	1.32117e+11	2.17033e+09	6.88978e-06	24.8032		1500	441	343.307	27.9657	0.0250207	1.54245e+11	1.54245e+11	3.85934e+09	1.02281e-05	36.8213			1950	441	658.349	49.6543	0.0328976	1.74161e+11	1.74161e+11	5.72949e+09	1.31465e-05	47.3276		2450	441	1072.53	58.74	0.0417465	1.9629e+11	1.9629e+11	8.19443e+09	1.62754e-05	58.5914		2950	441	1545.37	70.5429	0.0506349
1000	451	124.953	25.5	0.0166655	1.32117e+11	1.32117e+11	2.20179e+09	6.88845e-06	24.7984		1500	451	342.322	27.9229	0.0253993	1.54245e+11	1.54245e+11	3.91773e+09	1.02245e-05	36.8082			1950	451	659.482	48.4029	0.0334115	1.74161e+11	1.74161e+11	5.819e+09	1.31395e-05	47.302		2450	451	1073.86	58.4057	0.0424178	1.9629e+11	1.9629e+11	8.3262e+09	1.62627e-05	58.5455		2950	451	1547.05	70.4743	0.0514678
1000	461	125.605	24.9171	0.0168996	1.32117e+11	1.32117e+11	2.23272e+09	6.88713e-06	24.7937		1500	461	343.211	28.78	0.0257724	1.54245e+11	1.54245e+11	3.97528e+09	1.02209e-05	36.7953			1950	461	660.64	45.36	0.0339188	1.74161e+11	1.74161e+11	5.90736e+09	1.31325e-05	47.2768		2450	461	1075.27	59.1171	0.0430815	1.9629e+11	1.9629e+11	8.45647e+09	1.62501e-05	58.5003		2950	461	1548.65	70.0543	0.0522921
1000	471	126.197	25.0971	0.0171298	1.32117e+11	1.32117e+11	2.26314e+09	6.88584e-06	24.789		1500	471	344.108	28.12	0.0261401	1.54245e+11	1.54245e+11	4.03199e+09	1.02174e-05	36.7826			1950	471	661.547	45.1971	0.0344197	1.74161e+11	1.74161e+11	5.99459e+09	1.31256e-05	47.252		2450	471	1076.63	59.6314	0.0437377	1.9629e+11	1.9629e+11	8.58528e+09	1.62377e-05	58.4556		2950	471	1550.28	69.8829	0.0531082
1000	481	126.748	25.5771	0.0173562	1.32117e+11	1.32117e+11	2.29304e+09	6.88457e-06	24.7845		1500	481	345.068	37.7914	0.0265025	1.54245e+11	1.54245e+11	4.0879e+09	1.02139e-05	36.77			1950	481	662.49	45.4286	0.0349143	1.74161e+11	1.74161e+11	6.08072e+09	1.31187e-05	47.2275		2450	481	1078.07	60.1886	0.0443866	1.9629e+11	1.9629e+11	8.71266e+09	1.62254e-05	58.4114		2950	481	1551.89	69.3257	0.0539162
1000	491	127.311	25.1143	0.0175788	1.32117e+11	1.32117e+11	2.32245e+09	6.88333e-06	24.78		1500	491	345.931	38.58	0.0268598	1.54245e+11	1.54245e+11	4.143e+09	1.02105e-05	36.7577			1950	491	663.622	45.1114	0.0354026	1.74161e+11	1.74161e+11	6.16577e+09	1.3112e-05	47.2033		2450	491	1079.48	60.0171	0.0450284	1.9629e+11	1.9629e+11	8.83865e+09	1.62133e-05	58.3678		2950	491	1553.52	69.9429	0.0547163
1000	501	127.937	25.0457	0.0177977	1.32117e+11	1.32117e+11	2.35138e+09	6.8821e-06	24.7756		1500	501	346.731	37.9543	0.027212	1.54245e+11	1.54245e+11	4.19733e+09	1.02071e-05	36.7455			1950	501	664.782	46.8514	0.0358849	1.74161e+11	1.74161e+11	6.24977e+09	1.31054e-05	47.1795		2450	501	1080.89	60.12	0.0456633	1.9629e+11	1.9629e+11	8.96326e+09	1.62013e-05	58.3248		2950	501	1555.14	69.8786	0.0555087
1000	511	128.535	25.5171	0.0180131	1.32117e+11	1.32117e+11	2.37982e+09	6.88089e-06	24.7712		1500	511	347.712	35.3571	0.0275592	1.54245e+11	1.54245e+11	4.25089e+09	1.02038e-05	36.7336			1950	511	665.903	47.9743	0.0363613	1.74161e+11	1.74161e+11	6.33274e+09	1.30989e-05	47.1559		2450	511	1082.27	59.9314	0.0462913	1.9629e+11	1.9629e+11	9.08654e+09	1.61895e-05	58.2823		2950	511	1556.81	71.7964	0.0562935
1000	521	129.119	25.62	0.0182248	1.32117e+11	1.32117e+11	2.4078e+09	6.87971e-06	24.767		1500	521	348.536	34.86	0.0279017	1.54245e+11	1.54245e+11	4.3037e+09	1.02005e-05	36.7218			1950	521	667.013	47.7171	0.0368319	1.74161e+11	1.74161e+11	6.41469e+09	1.30924e-05	47.1327		2450	521	1083.65	59.46	0.0469127	1.9629e+11	1.9629e+11	9.20851e+09	1.61779e-05	58.2403		2950	521	1553.79	72.6	0.0570709
1000	531	129.725	24.8914	0.0184332	1.32117e+11	1.32117e+11	2.43533e+09	6.87854e-06	24.7628		1500	531	349.193	35.2714	0.0282393	1.54245e+11	1.54245e+11	4.35579e+09	1.01973e-05	36.7101			1950	531	668.087	47.2457	0.0372968	1.74161e+11	1.74161e+11	6.49566e+09	1.30861e-05	47.1098		2450	531	1085.07	59.0657	0.0475275	1.9629e+11	1.9629e+11	9.32919e+09	1.61663e-05	58.1988		2950	531	1555.58	71.6357	0.057841
1000	541	130.3	24.8743	0.0186381	1.32117e+11	1.32117e+11	2.46241e+09	6.8774e-06	24.7586		1500	541	349.998	33.9943	0.0285723	1.54245e+11	1.54245e+11	4.40715e+09	1.01941e-05	36.6986			1950	541	669.189	47.7171	0.0377561	1.74161e+11	1.74161e+11	6.57565e+09	1.30798e-05	47.0872		2450	541	1086.42	59.2114	0.048136	1.9629e+11	1.9629e+11	9.44863e+09	1.61549e-05	58.1577		2950	541	1557.28	71.1857	0.0586041
1000	551	130.841	24.8571	0.0188398	1.32117e+11	1.32117e+11	2.48904e+09	6.87627e-06	24.7546		1500	551	350.846	33.8057	0.0289008	1.54245e+11	1.54245e+11	4.45781e+09	1.01909e-05	36.6873			1950	551	670.294	47.8714	0.0382099	1.74161e+11	1.74161e+11	6.6547e+09	1.30736e-05	47.0648		2450	551	1087.78	58.9543	0.0487382	1.9629e+11	1.9629e+11	9.56684e+09	1.61437e-05	58.1172		2950	551	1558.81	69.0086	0.0593603
1000	561	131.437	24.6857	0.0190381	1.32117e+11	1.32117e+11	2.51525e+09	6.87516e-06	24.7506		1500	561	351.678	35.2886	0.0292247	1.54245e+11	1.54245e+11	4.50778e+09	1.01878e-05	36.6762			1950	561	671.47	48.5657	0.0386585	1.74161e+11	1.74161e+11	6.73282e+09	1.30674e-05	47.0428		2450	561	1089.18	58.4143	0.0493343	1.9629e+11	1.9629e+11	9.68385e+09	1.61325e-05	58.0771		2950	561	1560.43	64.44	0.0601097
1000	571	132.019	24.7114	0.0192333	1.32117e+11	1.32117e+11	2.54104e+09	6.87407e-06	24.7467		1500	571	352.48	35.4429	0.0295443	1.54245e+11	1.54245e+11	4.55708e+09	1.01848e-05	36.6652			1950	571	672.598	48.8057	0.0391018	1.74161e+11	1.74161e+11	6.81002e+09	1.30614e-05	47.021		2450	571	1090.53	58.5171	0.0499244	1.9629e+11	1.9629e+11	9.79967e+09	1.61215e-05	58.0375		2950	571	1561.84	65.5286	0.0608525
1000	581	132.605	25.0886	0.0194254	1.32117e+11	1.32117e+11	2.56642e+09	6.873e-06	24.7428		1500	581	353.31	35.7514	0.0298596	1.54245e+11	1.54245e+11	4.60571e+09	1.01818e-05	36.6544			1950	581	673.753	48.7371	0.0395399	1.74161e+11	1.74161e+11	6.88633e+09	1.30554e-05	46.9995		2450	581	1091.88	58.8771	0.0505086	1.9629e+11	1.9629e+11	9.91435e+09	1.61106e-05	57.9983		2950	581	1563.09	66.3857	0.0615887
1000	591	133.183	24.6771	0.0196144	1.32117e+11	1.32117e+11	2.59139e+09	6.87194e-06	24.739		1500	591	354.133	35.8714	0.0301707	1.54245e+11	1.54245e+11	4.65369e+09	1.01788e-05	36.6437			1950	591	674.883	48.0943	0.039973	1.74161e+11	1.74161e+11	6.96176e+09	1.30495e-05	46.9783		2450	591	1093.25	58.575	0.051087	1.9629e+11	1.9629e+11	1.00279e+10	1.60999e-05	57.9596		2950	591	1564.92	66.5743	0.0623187
1000	601	133.768	24.78	0.0198004	1.32117e+11	1.32117e+11	2.61596e+09	6.8709e-06	24.7352		1500	601	355.017	36.8914	0.0304777	1.54245e+11	1.54245e+11	4.70104e+09	1.01759e-05	36.6332			1950	601	675.98	48.4371	0.0404012	1.74161e+11	1.74161e+11	7.03634e+09	1.30437e-05	46.9573		2450	601	1094.65	59.0679	0.0516598	1.9629e+11	1.9629e+11	1.01403e+10	1.60892e-05	57.9213		2950	601	1566.55	68.6057	0.0630423
1000	611	134.316	24.2743	0.0199835	1.32117e+11	1.32117e+11	2.64015e+09	6.86988e-06	24.7316		1500	611	355.863	37.3886	0.0307806	1.54245e+11	1.54245e+11	4.74776e+09	1.0173e-05	36.6228			1950	611	677.081	48	0.0408246	1.74161e+11	1.74161e+11	7.11007e+09	1.30379e-05	46.9366		2450	611	1104.19	59.7107	0.0522271	1.9629e+11	1.9629e+11	1.02517e+10	1.60787e-05	57.8834		2950	611	1568.2	71.5886	0.0637599
1000	621	134.91	24.78	0.0201636	1.32117e+11	1.32117e+11	2.66395e+09	6.86888e-06	24.728		1500	621	356.784	38.1429	0.0310795	1.54245e+11	1.54245e+11	4.79387e+09	1.01701e-05	36.6125			1950	621	678.249	48.1114	0.0412432	1.74161e+11	1.74161e+11	7.18297e+09	1.30323e-05	46.9161		2450	621	1105.58	59.9464	0.052789	1.9629e+11	1.9629e+11	1.0362e+10	1.60683e-05	57.8459		2950	621	1569.84	68.3143	0.0644715
1000	631	135.437	24.3429	0.020341	1.32117e+11	1.32117e+11	2.68738e+09	6.86789e-06	24.7244		1500	631	357.672	38.1771	0.0313745	1.54245e+11	1.54245e+11	4.83937e+09	1.01673e-05	36.6024			1950	631	679.353	48.2829	0.0416571	1.74161e+11	1.74161e+11	7.25506e+09	1.30266e-05	46.8959		2450	631	1107	60.3107	0.0533455	1.9629e+11	1.9629e+11	1.04712e+10	1.6058e-05	57.8089		2950	631	1571.45	68.8114	0.0651772
1000	641	136.074	24.7114	0.0205155	1.32117e+11	1.32117e+11	2.71044e+09	6.86691e-06	24.7209		1500	641	358.583	38.5114	0.0316657	1.54245e+11	1.54245e+11	4.88429e+09	1.01646e-05	36.5924			1950	641	680.496	48.3343	0.0420665	1.74161e+11	1.74161e+11	7.32636e+09	1.30211e-05	46.8759		2450	641	1108.38	59.5886	0.0538968	1.9629e+11	1.9629e+11	1.05794e+10	1.60478e-05	57.7722		2950	641	1572.89	68.2543	0.0658772
1000	651	136.608	24.66	0.0206874	1.32117e+11	1.32117e+11	2.73315e+09	6.86595e-06	24.7174		1500	651	359.471	38.34	0.0319531	1.54245e+11	1.54245e+11	4.92862e+09	1.01618e-05	36.5826			1950	651	681.613	47.7171	0.0424713	1.74161e+11	1.74161e+11	7.39687e+09	1.30156e-05	46.8562		2450	651	1109.82	59.04	0.054443	1.9629e+11	1.9629e+11	1.06866e+10	1.60378e-05	57.7359		2950	651	1574.58	67.98	0.0665715
1000	661	137.199	25.1786	0.0208565	1.32117e+11	1.32117e+11	2.75549e+09	6.86501e-06	24.714		1500	661	360.356	37.9971	0.0322369	1.54245e+11	1.54245e+11	4.97239e+09	1.01591e-05	36.5729			1950	661	682.72	47.5886	0.0428718	1.74161e+11	1.74161e+11	7.46662e+09	1.30102e-05	46.8367		2450	661	1111.14	58.2429	0.0549841	1.9629e+11	1.9629e+11	1.07928e+10	1.60278e-05	57.7		2950	661	1576.16	68.0143	0.0672603
1000	671	137.787	24.2464	0.0210231	1.32117e+11	1.32117e+11	2.7775e+09	6.86408e-06	24.7107		1500	671	361.257	37.6029	0.032517	1.54245e+11	1.54245e+11	5.0156e+09	1.01565e-05	36.5633			1950	671	683.816	47.3914	0.0432679	1.74161e+11	1.74161e+11	7.53561e+09	1.30048e-05	46.8174		2450	671	1112.47	58.0714	0.0555203	1.9629e+11	1.9629e+11	1.08981e+10	1.60179e-05	57.6645		2950	671	1577.77	69.6257	0.0679436
1000	681	137.052	25.9179	0.0211871	1.32117e+11	1.32117e+11	2.79916e+09	6.86317e-06	24.7074		1500	681	362.105	37.4314	0.0327936	1.54245e+11	1.54245e+11	5.05826e+09	1.01539e-05	36.5539			1950	681	684.905	47.04	0.0436598	1.74161e+11	1.74161e+11	7.60386e+09	1.29995e-05	46.7983		2450	681	1113.79	57.9171	0.0560517	1.9629e+11	1.9629e+11	1.10024e+10	1.60081e-05	57.6293		2950	681	1579.38	68.6314	0.0686216
1000	691	137.602	24.1821	0.0213485	1.32117e+11	1.32117e+11	2.82049e+09	6.86227e-06	24.7042		1500	691	362.97	36.8057	0.0330666	1.54245e+11	1.54245e+11	5.10038e+09	1.01513e-05	36.5446			1950	691	686.025	47.5629	0.0440475	1.74161e+11	1.74161e+11	7.67138e+09	1.29943e-05	46.7795		2450	691	1115.16	58.32	0.0565783	1.9629e+11	1.9629e+11	1.11058e+10	1.59985e-05	57.5945		2950	691	1581.01	69.3257	0.0692944
1000	701	138.292	24.9429	0.0215075	1.32117e+11	1.32117e+11	2.84149e+09	6.86139e-06	24.701		1500	701	363.838	36.6429	0.0333363	1.54245e+11	1.54245e+11	5.14197e+09	1.01487e-05	36.5354			1950	701	687.101	47.5371	0.0444311	1.74161e+11	1.74161e+11	7.73819e+09	1.29891e-05	46.7608		2450	701	1116.57	58.74	0.0571002	1.9629e+11	1.9629e+11	1.12082e+10	1.59889e-05	57.56		2950	701	1582.59	69.3514	0.069962
1000	711	138.721	25.6457	0.021664	1.32117e+11	1.32117e+11	2.86218e+09	6.86052e-06	24.6979		1500	711	364.65	36.7371	0.0336025	1.54245e+11	1.54245e+11	5.18304e+09	1.01462e-05	36.5263			1950	711	688.269	47.7536	0.0448107	1.74161e+11	1.74161e+11	7.8043e+09	1.2984e-05	46.7424		2450	711	1117.94	59.3657	0.0576175	1.9629e+11	1.9629e+11	1.13098e+10	1.59794e-05	57.5259		2950	711	1584.25	69.0343	0.0706246
1000	721	139.38	25.1914	0.0218182	1.32117e+11	1.32117e+11	2.88254e+09	6.85966e-06	24.6948		1500	721	365.532	36.7886	0.0338655	1.54245e+11	1.54245e+11	5.2236e+09	1.01437e-05	36.5173			1950	721	689.362	47.6714	0.0451863	1.74161e+11	1.74161e+11	7.86972e+09	1.29789e-05	46.7242		2450	721	1119.32	59.4257	0.0581303	1.9629e+11	1.9629e+11	1.14104e+10	1.597e-05	57.4921		2950	721	1585.86	68.6143	0.0712822
1000	731	140.044	24.0086	0.02197	1.32117e+11	1.32117e+11	2.9026e+09	6.85881e-06	24.6917		1500	731	366.391	36.78	0.0341252	1.54245e+11	1.54245e+11	5.26365e+09	1.01412e-05	36.5084			1950	731	705.325	48.9	0.0455581	1.74161e+11	1.74161e+11	7.93446e+09	1.29739e-05	46.7062		2450	731	1120.72	59.0229	0.0586387	1.9629e+11	1.9629e+11	1.15102e+10	1.59607e-05	57.4587		2950	731	1587.43	68.7686	0.071935
1000	741	140.541	26.2029	0.0221195	1.32117e+11	1.32117e+11	2.92235e+09	6.85798e-06	24.6887		1500	741	367.262	37.02	0.0343817	1.54245e+11	1.54245e+11	5.30322e+09	1.01388e-05	36.4997			1950	741	720.372	47.5571	0.045926	1.74161e+11	1.74161e+11	7.99853e+09	1.2969e-05	46.6884		2450	741	1122.09	59.0657	0.0591427	1.9629e+11	1.9629e+11	1.16091e+10	1.59515e-05	57.4255		2950	741	1589.02	67.9543	0.072583
1000	751	141.093	25.08	0.0222667	1.32117e+11	1.32117e+11	2.9418e+09	6.85716e-06	24.6858		1500	751	368.129	36.8914	0.034635	1.54245e+11	1.54245e+11	5.34229e+09	1.01364e-05	36.4911			1950	751	721.534	47.0286	0.0462901	1.74161e+11	1.74161e+11	8.06195e+09	1.29641e-05	46.6707		2450	751	1123.46	58.9629	0.0596425	1.9629e+11	1.9629e+11	1.17072e+10	1.59424e-05	57.3927		2950	751	1590.61	67.7486	0.0732262
1000	761	141.778	24.1457	0.0224117	1.32117e+11	1.32117e+11	2.96096e+09	6.85636e-06	24.6829		1500	761	368.969	37.1229	0.0348853	1.54245e+11	1.54245e+11	5.3809e+09	1.0134e-05	36.4826			1950	761	722.608	46.6714	0.0466506	1.74161e+11	1.74161e+11	8.12473e+09	1.29593e-05	46.6533		2450	761	1124.83	58.9629	0.060138	1.9629e+11	1.9629e+11	1.18045e+10	1.59334e-05	57.3602		2950	761	1592.18	67.8686	0.0738649
1000	771	142.306	25.1057	0.0225546	1.32117e+11	1.32117e+11	2.97983e+09	6.85556e-06	24.68		1500	771	369.836	36.72	0.0351325	1.54245e+11	1.54245e+11	5.41903e+09	1.01317e-05	36.4742			1950	771	723.664	46.86	0.0470074	1.74161e+11	1.74161e+11	8.18687e+09	1.29545e-05	46.6361		2450	771	1126.2	57.9943	0.0606294	1.9629e+11	1.9629e+11	1.1901e+10	1.59245e-05	57.3281		2950	771	1593.77	68.2629	0.074499
1000	781	142.861	25.8086	0.0226953	1.32117e+11	1.32117e+11	2.99842e+09	6.85478e-06	24.6772		1500	781	370.722	36.9429	0.0353767	1.54245e+11	1.54245e+11	5.4567e+09	1.01294e-05	36.4659			1950	781	724.728	46.38	0.0473606	1.74161e+11	1.74161e+11	8.24839e+09	1.29497e-05	46.619		2450	781	1127.6	58.2686	0.0611167	1.9629e+11	1.9629e+11	1.19966e+10	1.59156e-05	57.2962		2950	781	1595.35	68.2821	0.0751286
1000	791	143.47	24.7029	0.0228339	1.32117e+11	1.32117e+11	3.01673e+09	6.85401e-06	24.6744		1500	791	371.546	37.38	0.035618	1.54245e+11	1.54245e+11	5.49392e+09	1.01271e-05	36.4577			1950	791	725.839	46.9714	0.0477103	1.74161e+11	1.74161e+11	8.3093e+09	1.2945e-05	46.6022		2450	791	1128.86	58.1143	0.0616	1.9629e+11	1.9629e+11	1.20915e+10	1.59068e-05	57.2646		2950	791	1596.98	68.1857	0.0757538
1000	801	144.104	24.3429	0.0229704	1.32117e+11	1.32117e+11	3.03477e+09	6.85325e-06	24.6717		1500	801	372.439	37.3457	0.0358564	1.54245e+11	1.54245e+11	5.53069e+09	1.01249e-05	36.4496			1950	801	726.945	47.5543	0.0480566	1.74161e+11	1.74161e+11	8.3696e+09	1.29404e-05	46.5855		2450	801	1130.26	58.02	0.0620794	1.9629e+11	1.9629e+11	1.21856e+10	1.58981e-05	57.2333		2950	801	1592.41	68.4857	0.0763747
1000	811	144.66	24.6	0.0231049	1.32117e+11	1.32117e+11	3.05254e+09	6.85251e-06	24.669		1500	811	373.33	37.0286	0.036092	1.54245e+11	1.54245e+11	5.56703e+09	1.01227e-05	36.4416			1950	811	728.088	48.0943	0.0483994	1.74161e+11	1.74161e+11	8.42931e+09	1.29358e-05	46.5689		2450	811	1131.61	57.9086	0.0625549	1.9629e+11	1.9629e+11	1.22789e+10	1.58895e-05	57.2023		2950	811	1593.96	69.75	0.0769914
1000	821	145.146	23.7171	0.0232374	1.32117e+11	1.32117e+11	3.07004e+09	6.85177e-06	24.6664		1500	821	374.193	37.2	0.0363248	1.54245e+11	1.54245e+11	5.60293e+09	1.01205e-05	36.4337			1950	821	729.212	48.3	0.0487389	1.74161e+11	1.74161e+11	8.48844e+09	1.29313e-05	46.5526		2450	821	1132.97	58.92	0.0630265	1.9629e+11	1.9629e+11	1.23715e+10	1.5881e-05	57.1716		2950	821	1595.58	69.1393	0.0776039
1000	831	145.731	23.3143	0.0233679	1.32117e+11	1.32117e+11	3.08729e+09	6.85105e-06	24.6638		1500	831	375.042	36.8657	0.0365548	1.54245e+11	1.54245e+11	5.63841e+09	1.01183e-05	36.4258			1950	831	730.339	48.3	0.0490751	1.74161e+11	1.74161e+11	8.54699e+09	1.29268e-05	46.5364		2450	831	1134.35	58.6607	0.0634945	1.9629e+11	1.9629e+11	1.24634e+10	1.58725e-05	57.1411		2950	831	1597.28	68.1	0.0782122
1000	841	146.237	22.98	0.0234965	1.32117e+11	1.32117e+11	3.10428e+09	6.85033e-06	24.6612		1500	841	375.886	36.3857	0.0367821	1.54245e+11	1.54245e+11	5.67348e+09	1.01161e-05	36.4181			1950	841	731.474	48.0171	0.0494081	1.74161e+11	1.74161e+11	8.60498e+09	1.29223e-05	46.5204		2450	841	1135.73	59.9679	0.0639587	1.9629e+11	1.9629e+11	1.25545e+10	1.58642e-05	57.1109		2950	841	1598.86	70.3629	0.0788165
1000	851	146.824	26.2714	0.0236233	1.32117e+11	1.32117e+11	3.12102e+09	6.84963e-06	24.6587		1500	851	376.74	36.4886	0.0370068	1.54245e+11	1.54245e+11	5.70813e+09	1.0114e-05	36.4105			1950	851	732.58	47.8714	0.0497378	1.74161e+11	1.74161e+11	8.66241e+09	1.29179e-05	46.5046		2450	851	1132.26	59.5393	0.0644193	1.9629e+11	1.9629e+11	1.26449e+10	1.58558e-05	57.081		2950	851	1600.35	69.9857	0.0794168
1000	861	147.341	26.2886	0.0237481	1.32117e+11	1.32117e+11	3.13752e+09	6.84894e-06	24.6562		1500	861	377.575	36.5486	0.0372288	1.54245e+11	1.54245e+11	5.74237e+09	1.01119e-05	36.403			1950	861	733.69	48.0086	0.0500644	1.74161e+11	1.74161e+11	8.7193e+09	1.29136e-05	46.4889		2450	861	1133.74	61.1893	0.0648763	1.9629e+11	1.9629e+11	1.27346e+10	1.58476e-05	57.0514		2950	861	1602.17	69.6943	0.0800132
1000	871	148.211	26.5371	0.0238712	1.32117e+11	1.32117e+11	3.15378e+09	6.84825e-06	24.6537		1500	871	378.45	36.6	0.0374483	1.54245e+11	1.54245e+11	5.77622e+09	1.01099e-05	36.3956			1950	871	734.797	48.2571	0.0503879	1.74161e+11	1.74161e+11	8.77564e+09	1.29093e-05	46.4734		2450	871	1135.05	60.1071	0.0653298	1.9629e+11	1.9629e+11	1.28236e+10	1.58394e-05	57.022		2950	871	1603.75	68.0914	0.0806058
1000	881	148.798	26.4257	0.0239924	1.32117e+11	1.32117e+11	3.16979e+09	6.84758e-06	24.6513		1500	881	379.306	36.4457	0.0376652	1.54245e+11	1.54245e+11	5.80968e+09	1.01078e-05	36.3882			1950	881	735.94	47.9571	0.0507084	1.74161e+11	1.74161e+11	8.83145e+09	1.2905e-05	46.458		2450	881	1136.59	60.8571	0.0657798	1.9629e+11	1.9629e+11	1.29119e+10	1.58314e-05	56.9929		2950	881	1605.42	67.5257	0.0811945
1000	891	149.333	27.0686	0.0241119	1.32117e+11	1.32117e+11	3.18558e+09	6.84692e-06	24.6489		1500	891	380.156	36.3086	0.0378796	1.54245e+11	1.54245e+11	5.84276e+09	1.01058e-05	36.381			1950	891	737.104	47.9057	0.0510259	1.74161e+11	1.74161e+11	8.88674e+09	1.29008e-05	46.4428		2450	891	1137.87	59.1257	0.0662264	1.9629e+11	1.9629e+11	1.29996e+10	1.58233e-05	56.964		2950	891	1606.8	64.5343	0.0817795
1000	901	149.907	24.84	0.0242296	1.32117e+11	1.32117e+11	3.20113e+09	6.84627e-06	24.6466		1500	901	380.992	36.0514	0.0380915	1.54245e+11	1.54245e+11	5.87545e+09	1.01038e-05	36.3738			1950	901	738.175	47.9829	0.0513404	1.74161e+11	1.74161e+11	8.94152e+09	1.28966e-05	46.4278		2450	901	1139.36	57.9514	0.0666696	1.9629e+11	1.9629e+11	1.30866e+10	1.58154e-05	56.9354		2950	901	1608.23	66.1714	0.0823608
1000	911	150.499	24.1971	0.0243456	1.32117e+11	1.32117e+11	3.21646e+09	6.84562e-06	24.6442		1500	911	381.811	35.9657	0.0383011	1.54245e+11	1.54245e+11	5.90777e+09	1.01019e-05	36.3667			1950	911	739.279	47.4514	0.051652	1.74161e+11	1.74161e+11	8.99578e+09	1.28925e-05	46.4128		2450	911	1140.64	56.0486	0.0671095	1.9629e+11	1.9629e+11	1.3173e+10	1.58075e-05	56.907		2950	911	1609.7	65.58	0.0829384
1000	921	151.109	24	0.02446	1.32117e+11	1.32117e+11	3.23157e+09	6.84499e-06	24.642		1500	921	382.656	35.85	0.0385082	1.54245e+11	1.54245e+11	5.93972e+09	1.00999e-05	36.3597			1950	921	740.395	47.1086	0.0519607	1.74161e+11	1.74161e+11	9.04955e+09	1.28884e-05	46.3981		2450	921	1141.81	56.7857	0.0675462	1.9629e+11	1.9629e+11	1.32587e+10	1.57997e-05	56.8788		2950	921	1611.47	66.9	0.0835125
1000	931	151.621	23.0486	0.0245727	1.32117e+11	1.32117e+11	3.24645e+09	6.84437e-06	24.6397		1500	931	383.502	36.2679	0.038713	1.54245e+11	1.54245e+11	5.97131e+09	1.0098e-05	36.3528			1950	931	741.476	47.6486	0.0522666	1.74161e+11	1.74161e+11	9.10282e+09	1.28843e-05	46.3835		2450	931	1143.13	55.9114	0.0679796	1.9629e+11	1.9629e+11	1.33437e+10	1.57919e-05	56.8509		2950	931	1613.07	68.4514	0.084083
1000	941	152.133	22.1829	0.0246837	1.32117e+11	1.32117e+11	3.26113e+09	6.84375e-06	24.6375		1500	941	395.609	37.5321	0.0389155	1.54245e+11	1.54245e+11	6.00254e+09	1.00961e-05	36.3459			1950	941	742.6	47.3314	0.0525697	1.74161e+11	1.74161e+11	9.15561e+09	1.28803e-05	46.369		2450	941	1144.49	57.6	0.0684098	1.9629e+11	1.9629e+11	1.34282e+10	1.57842e-05	56.8232		2950	941	1614.61	69.4114	0.0846501
1000	951	152.596	22.02	0.0247932	1.32117e+11	1.32117e+11	3.27559e+09	6.84314e-06	24.6353		1500	951	396.484	38.2714	0.0391157	1.54245e+11	1.54245e+11	6.03342e+09	1.00942e-05	36.3392			1950	951	743.734	47.2629	0.05287	1.74161e+11	1.74161e+11	9.20792e+09	1.28763e-05	46.3547		2450	951	1145.88	59.4771	0.0688369	1.9629e+11	1.9629e+11	1.3512e+10	1.57766e-05	56.7958		2950	951	1616.21	68.4086	0.0852137
1000	961	153.087	22.6457	0.0249011	1.32117e+11	1.32117e+11	3.28985e+09	6.84255e-06	24.6332		1500	961	397.421	38.7321	0.0393137	1.54245e+11	1.54245e+11	6.06396e+09	1.00924e-05	36.3325			1950	961	744.801	47.4964	0.0531677	1.74161e+11	1.74161e+11	9.25976e+09	1.28724e-05	46.3405		2450	961	1147.36	60.0514	0.0692609	1.9629e+11	1.9629e+11	1.35953e+10	1.5769e-05	56.7685		2950	961	1617.8	68.6657	0.0857739
1000	971	153.678	23.1943	0.0250074	1.32117e+11	1.32117e+11	3.3039e+09	6.84196e-06	24.631		1500	971	398.335	38.5971	0.0395095	1.54245e+11	1.54245e+11	6.09415e+09	1.00905e-05	36.3259			1950	971	745.909	48.8036	0.0534626	1.74161e+11	1.74161e+11	9.31113e+09	1.28684e-05	46.3264		2450	971	1148.75	60.3171	0.0696819	1.9629e+11	1.9629e+11	1.36779e+10	1.57615e-05	56.7415		2950	971	1619.45	69.7714	0.0863308
1000	981	154.263	24.1371	0.0251123	1.32117e+11	1.32117e+11	3.31775e+09	6.84138e-06	24.629		1500	981	399.224	38.4086	0.039703	1.54245e+11	1.54245e+11	6.12401e+09	1.00887e-05	36.3194			1950	981	743.458	48.2786	0.053755	1.74161e+11	1.74161e+11	9.36205e+09	1.28646e-05	46.3125		2450	981	1150.13	59.9829	0.0700999	1.9629e+11	1.9629e+11	1.37599e+10	1.57541e-05	56.7147		2950	981	1621.08	69.18	0.0868845
1000	991	154.839	24.7371	0.0252156	1.32117e+11	1.32117e+11	3.3314e+09	6.84081e-06	24.6269		1500	991	400.112	37.8	0.0398945	1.54245e+11	1.54245e+11	6.15354e+09	1.00869e-05	36.3129			1950	991	744.704	49.1036	0.0540447	1.74161e+11	1.74161e+11	9.41251e+09	1.28607e-05	46.2987		2450	991	1151.53	58.6543	0.0705149	1.9629e+11	1.9629e+11	1.38414e+10	1.57467e-05	56.6882		2950	991	1622.75	69.1371	0.0874348
1000	1001	155.412	24.36	0.0253175	1.32117e+11	1.32117e+11	3.34486e+09	6.84024e-06	24.6249		1500	1001	400.965	36.8571	0.0400838	1.54245e+11	1.54245e+11	6.18274e+09	1.00851e-05	36.3065			1950	1001	745.789	50.4536	0.0543319	1.74161e+11	1.74161e+11	9.46253e+09	1.28569e-05	46.285		2450	1001	1152.88	58.2086	0.070927	1.9629e+11	1.9629e+11	1.39223e+10	1.57394e-05	56.6618		2950	1001	1624.29	68.7257	0.087982
1000	1011	155.973	24.2057	0.0254179	1.32117e+11	1.32117e+11	3.35813e+09	6.83969e-06	24.6229		1500	1011	401.831	36.4371	0.040271	1.54245e+11	1.54245e+11	6.21162e+09	1.00834e-05	36.3002			1950	1011	746.933	50.0229	0.0546166	1.74161e+11	1.74161e+11	9.51211e+09	1.28532e-05	46.2715		2450	1011	1154.2	58.0371	0.0713363	1.9629e+11	1.9629e+11	1.40026e+10	1.57321e-05	56.6356		2950	1011	1625.86	68.1943	0.0885261
1000	1021	156.52	24.0514	0.0255169	1.32117e+11	1.32117e+11	3.37121e+09	6.83914e-06	24.6209		1500	1021	402.635	35.52	0.0404562	1.54245e+11	1.54245e+11	6.24019e+09	1.00817e-05	36.294			1950	1021	748.167	48.0943	0.0548988	1.74161e+11	1.74161e+11	9.56125e+09	1.28495e-05	46.2581		2450	1021	1155.54	58.0286	0.0717427	1.9629e+11	1.9629e+11	1.40824e+10	1.57249e-05	56.6097		2950	1021	1627.46	67.3114	0.089067
1000	1031	157.087	23.8371	0.0256145	1.32117e+11	1.32117e+11	3.3841e+09	6.8386e-06	24.619		1500	1031	403.475	35.4429	0.0406394	1.54245e+11	1.54245e+11	6.26844e+09	1.008e-05	36.2878			1950	1031	749.294	48.4714	0.0551785	1.74161e+11	1.74161e+11	9.60997e+09	1.28458e-05	46.2448		2450	1031	1156.9	58.2171	0.0721463	1.9629e+11	1.9629e+11	1.41616e+10	1.57178e-05	56.5839		2950	1031	1629.03	67.2171	0.0896049
1000	1041	157.645	24.0943	0.0257107	1.32117e+11	1.32117e+11	3.39681e+09	6.83807e-06	24.617		1500	1041	404.256	35.5286	0.0408205	1.54245e+11	1.54245e+11	6.29638e+09	1.00783e-05	36.2817			1950	1041	750.315	48.42	0.0554558	1.74161e+11	1.74161e+11	9.65826e+09	1.28421e-05	46.2316		2450	1041	1158.3	58.4486	0.0725471	1.9629e+11	1.9629e+11	1.42403e+10	1.57107e-05	56.5584		2950	1041	1630.6	67.1657	0.0901397
1000	1051	158.193	23.7	0.0258056	1.32117e+11	1.32117e+11	3.40935e+09	6.83754e-06	24.6152		1500	1051	405.1	35.5886	0.0409997	1.54245e+11	1.54245e+11	6.32402e+09	1.00766e-05	36.2757			1950	1051	751.444	48.2229	0.0557307	1.74161e+11	1.74161e+11	9.70614e+09	1.28385e-05	46.2186		2450	1051	1159.67	58.7743	0.0729452	1.9629e+11	1.9629e+11	1.43184e+10	1.57036e-05	56.533		2950	1051	1632.13	66.9686	0.0906715
1000	1061	158.784	23.6314	0.0258991	1.32117e+11	1.32117e+11	3.4217e+09	6.83703e-06	24.6133		1500	1061	405.976	35.9657	0.041177	1.54245e+11	1.54245e+11	6.35136e+09	1.00749e-05	36.2697			1950	1061	752.582	48.1629	0.0560033	1.74161e+11	1.74161e+11	9.75361e+09	1.28349e-05	46.2056		2450	1061	1161.02	58.6714	0.0733406	1.9629e+11	1.9629e+11	1.43961e+10	1.56966e-05	56.5079		2950	1061	1633.7	66.6771	0.0912004
1000	1071	159.285	23.82	0.0259913	1.32117e+11	1.32117e+11	3.43389e+09	6.83652e-06	24.6115		1500	1071	406.787	37.0543	0.0413523	1.54245e+11	1.54245e+11	6.37841e+09	1.00733e-05	36.2638			1950	1071	753.793	48.3857	0.0562735	1.74161e+11	1.74161e+11	9.80068e+09	1.28313e-05	46.1928		2450	1071	1162.4	58.6114	0.0737334	1.9629e+11	1.9629e+11	1.44732e+10	1.56897e-05	56.4829		2950	1071	1635.28	67.0371	0.0917264
1000	1081	159.844	24.2829	0.0260823	1.32117e+11	1.32117e+11	3.4459e+09	6.83601e-06	24.6097		1500	1081	407.671	37.0286	0.0415258	1.54245e+11	1.54245e+11	6.40516e+09	1.00717e-05	36.258			1950	1081	754.913	49.2771	0.0565415	1.74161e+11	1.74161e+11	9.84735e+09	1.28278e-05	46.1801		2450	1081	1163.75	58.3114	0.0741235	1.9629e+11	1.9629e+11	1.45497e+10	1.56828e-05	56.4581		2950	1081	1636.81	67.4357	0.0922496
1000	1091	160.424	23.7086	0.0261719	1.32117e+11	1.32117e+11	3.45774e+09	6.83552e-06	24.6079		1500	1091	408.579	36.6771	0.0416974	1.54245e+11	1.54245e+11	6.43163e+09	1.00701e-05	36.2522			1950	1091	755.96	47.2029	0.0568072	1.74161e+11	1.74161e+11	9.89362e+09	1.28243e-05	46.1676		2450	1091	1165.14	58.5257	0.0745111	1.9629e+11	1.9629e+11	1.46258e+10	1.5676e-05	56.4335		2950	1091	1638.42	66.7607	0.0927698
1000	1101	161.026	24.6943	0.0262603	1.32117e+11	1.32117e+11	3.46942e+09	6.83503e-06	24.6061		1500	1101	409.42	37.2	0.0418672	1.54245e+11	1.54245e+11	6.45782e+09	1.00685e-05	36.2465			1950	1101	757.193	44.3657	0.0570706	1.74161e+11	1.74161e+11	9.9395e+09	1.28209e-05	46.1551		2450	1101	1166.47	58.02	0.0748961	1.9629e+11	1.9629e+11	1.47014e+10	1.56692e-05	56.4091		2950	1101	1655.67	67.1143	0.0932873
1000	1111	161.55	24.36	0.0263475	1.32117e+11	1.32117e+11	3.48094e+09	6.83455e-06	24.6044		1500	1111	410.255	36.8657	0.0420351	1.54245e+11	1.54245e+11	6.48373e+09	1.00669e-05	36.2409			1950	1111	758.089	44.6914	0.0573319	1.74161e+11	1.74161e+11	9.985e+09	1.28174e-05	46.1428		2450	1111	1167.85	57.5829	0.0752786	1.9629e+11	1.9629e+11	1.47765e+10	1.56625e-05	56.3849		2950	1111	1657.18	67.575	0.0938021
1000	1121	162.166	24.1371	0.0264334	1.32117e+11	1.32117e+11	3.49229e+09	6.83407e-06	24.6027		1500	1121	411.127	36.3771	0.0422013	1.54245e+11	1.54245e+11	6.50936e+09	1.00654e-05	36.2353			1950	1121	758.969	45.4029	0.0575909	1.74161e+11	1.74161e+11	1.00301e+10	1.2814e-05	46.1305		2450	1121	1169.17	57.2229	0.0756586	1.9629e+11	1.9629e+11	1.48511e+10	1.56558e-05	56.3608		2950	1121	1658.79	66.4929	0.094314
1000	1131	162.686	23.8886	0.0265182	1.32117e+11	1.32117e+11	3.50349e+09	6.83361e-06	24.601		1500	1131	411.972	36.4029	0.0423658	1.54245e+11	1.54245e+11	6.53473e+09	1.00638e-05	36.2298			1950	1131	760.127	44.4086	0.0578479	1.74161e+11	1.74161e+11	1.00749e+10	1.28107e-05	46.1184		2450	1131	1170.47	57.3514	0.0760361	1.9629e+11	1.9629e+11	1.49252e+10	1.56492e-05	56.3369		2950	1131	1660.37	66.7714	0.0948234
1000	1141	163.24	24.3343	0.0266018	1.32117e+11	1.32117e+11	3.51453e+09	6.83314e-06	24.5993		1500	1141	412.823	36.5314	0.0425284	1.54245e+11	1.54245e+11	6.55982e+09	1.00623e-05	36.2243			1950	1141	761.257	46.1914	0.0581027	1.74161e+11	1.74161e+11	1.01192e+10	1.28073e-05	46.1063		2450	1141	1171.81	56.8114	0.0764113	1.9629e+11	1.9629e+11	1.49988e+10	1.56426e-05	56.3132		2950	1141	1661.88	67.1486	0.09533
1000	1151	163.813	23.4	0.0266842	1.32117e+11	1.32117e+11	3.52542e+09	6.83269e-06	24.5977		1500	1151	413.667	36.1714	0.0426894	1.54245e+11	1.54245e+11	6.58465e+09	1.00608e-05	36.2189			1950	1151	762.374	47.64	0.0583554	1.74161e+11	1.74161e+11	1.01633e+10	1.2804e-05	46.0944		2450	1151	1173.16	57.06	0.076784	1.9629e+11	1.9629e+11	1.5072e+10	1.5636e-05	56.2897		2950	1151	1663.46	66.5743	0.095834
1000	1161	164.389	24.0686	0.0267655	1.32117e+11	1.32117e+11	3.53616e+09	6.83224e-06	24.5961		1500	1161	414.517	36.5657	0.0428487	1.54245e+11	1.54245e+11	6.60922e+09	1.00593e-05	36.2136			1950	1161	763.478	47.1257	0.058606	1.74161e+11	1.74161e+11	1.02069e+10	1.28007e-05	46.0826		2450	1161	1174.47	57.4071	0.0771544	1.9629e+11	1.9629e+11	1.51447e+10	1.56295e-05	56.2663		2950	1161	1665.02	65.6314	0.0963354
1000	1171	164.896	23.7429	0.0268456	1.32117e+11	1.32117e+11	3.54675e+09	6.8318e-06	24.5945		1500	1171	415.347	36.5143	0.0430064	1.54245e+11	1.54245e+11	6.63354e+09	1.00579e-05	36.2083			1950	1171	764.527	46.7486	0.0588546	1.74161e+11	1.74161e+11	1.02502e+10	1.27975e-05	46.0709		2450	1171	1175.83	57.4607	0.0775224	1.9629e+11	1.9629e+11	1.52169e+10	1.56231e-05	56.2431		2950	1171	1666.56	66.6429	0.0968343
1000	1181	165.494	23.9657	0.0269247	1.32117e+11	1.32117e+11	3.5572e+09	6.83136e-06	24.5929		1500	1181	416.238	36.4286	0.0431624	1.54245e+11	1.54245e+11	6.6576e+09	1.00564e-05	36.2031			1950	1181	765.625	46.7914	0.0591012	1.74161e+11	1.74161e+11	1.02932e+10	1.27942e-05	46.0593		2450	1181	1186.76	57.3	0.0778881	1.9629e+11	1.9629e+11	1.52887e+10	1.56167e-05	56.2201		2950	1181	1668.03	66.5486	0.0973306
1000	1191	166.01	23.8714	0.0270026	1.32117e+11	1.32117e+11	3.5675e+09	6.83093e-06	24.5914		1500	1191	417.083	36.3086	0.0433167	1.54245e+11	1.54245e+11	6.68141e+09	1.0055e-05	36.1979			1950	1191	766.711	46.9886	0.0593458	1.74161e+11	1.74161e+11	1.03358e+10	1.2791e-05	46.0477		2450	1191	1188.12	57.9536	0.0782515	1.9629e+11	1.9629e+11	1.536e+10	1.56103e-05	56.1972		2950	1191	1669.66	66.36	0.0978244
1000	1201	166.609	24.2657	0.0270795	1.32117e+11	1.32117e+11	3.57766e+09	6.83051e-06	24.5898		1500	1201	417.917	36.1971	0.0434695	1.54245e+11	1.54245e+11	6.70497e+09	1.00536e-05	36.1928			1950	1201	767.833	47.4171	0.0595885	1.74161e+11	1.74161e+11	1.0378e+10	1.27879e-05	46.0363		2450	1201	1189.45	57.8143	0.0786127	1.9629e+11	1.9629e+11	1.54309e+10	1.5604e-05	56.1745		2950	1201	1671.23	66.2057	0.0983158
1000	1211	167.174	24.1457	0.0271554	1.32117e+11	1.32117e+11	3.58768e+09	6.83009e-06	24.5883		1500	1211	418.753	36.0429	0.0436207	1.54245e+11	1.54245e+11	6.7283e+09	1.00521e-05	36.1877			1950	1211	768.96	47.7857	0.0598292	1.74161e+11	1.74161e+11	1.04199e+10	1.27847e-05	46.025		2450	1211	1190.82	56.8714	0.0789717	1.9629e+11	1.9629e+11	1.55014e+10	1.55978e-05	56.152		2950	1211	1672.76	66.8486	0.0988046
1000	1221	167.727	24.3	0.0272302	1.32117e+11	1.32117e+11	3.59756e+09	6.82968e-06	24.5868		1500	1221	419.57	36.0686	0.0437703	1.54245e+11	1.54245e+11	6.75138e+09	1.00508e-05	36.1827			1950	1221	770.059	47.8629	0.0600679	1.74161e+11	1.74161e+11	1.04615e+10	1.27816e-05	46.0138		2450	1221	1192.16	56.3314	0.0793285	1.9629e+11	1.9629e+11	1.55714e+10	1.55915e-05	56.1296		2950	1221	1674.29	64.5343	0.0992911
1000	1231	168.311	24.0171	0.027304	1.32117e+11	1.32117e+11	3.60731e+09	6.82927e-06	24.5854		1500	1231	420.443	35.6229	0.0439184	1.54245e+11	1.54245e+11	6.77422e+09	1.00494e-05	36.1778			1950	1231	771.2	47.9057	0.0603048	1.74161e+11	1.74161e+11	1.05028e+10	1.27785e-05	46.0026		2450	1231	1193.4	56.2029	0.079683	1.9629e+11	1.9629e+11	1.5641e+10	1.55854e-05	56.1073		2950	1231	1675.83	66.2743	0.0997752
1000	1241	168.845	23.6057	0.0273767	1.32117e+11	1.32117e+11	3.61692e+09	6.82887e-06	24.5839		1500	1241	421.291	35.7429	0.044065	1.54245e+11	1.54245e+11	6.79683e+09	1.0048e-05	36.1729			1950	1241	772.295	47.4171	0.0605399	1.74161e+11	1.74161e+11	1.05437e+10	1.27754e-05	45.9916		2450	1241	1194.69	55.86	0.0800355	1.9629e+11	1.9629e+11	1.57102e+10	1.55792e-05	56.0852		2950	1241	1677.18	66.4393	0.100257
1000	1251	169.411	23.6571	0.0274485	1.32117e+11	1.32117e+11	3.6264e+09	6.82847e-06	24.5825		1500	1251	422.073	36.0686	0.0442101	1.54245e+11	1.54245e+11	6.81921e+09	1.00467e-05	36.168			1950	1251	773.422	47.4857	0.060773	1.74161e+11	1.74161e+11	1.05843e+10	1.27724e-05	45.9806		2450	1251	1196.01	55.8857	0.0803858	1.9629e+11	1.9629e+11	1.5779e+10	1.55731e-05	56.0633		2950	1251	1678.96	67.05	0.100736
1000	1261	169.928	23.7086	0.0275193	1.32117e+11	1.32117e+11	3.63576e+09	6.82808e-06	24.5811		1500	1261	422.923	25.6829	0.0443537	1.54245e+11	1.54245e+11	6.84136e+09	1.00453e-05	36.1632			1950	1261	774.492	47.1429	0.0610044	1.74161e+11	1.74161e+11	1.06246e+10	1.27694e-05	45.9698		2450	1261	1197.34	56.5114	0.080734	1.9629e+11	1.9629e+11	1.58473e+10	1.55671e-05	56.0415		2950	1261	1674.36	67.575	0.101213
1000	1271	170.487	23.8629	0.0275892	1.32117e+11	1.32117e+11	3.64498e+09	6.8277e-06	24.5797		1500	1271	423.778	25.76	0.0444959	1.54245e+11	1.54245e+11	6.86329e+09	1.0044e-05	36.1585			1950	1271	775.599	47.7514	0.0612339	1.74161e+11	1.74161e+11	1.06646e+10	1.27664e-05	45.959		2450	1271	1198.68	56.8286	0.0810801	1.9629e+11	1.9629e+11	1.59153e+10	1.55611e-05	56.0199		2950	1271	1675.94	69.7714	0.101688
1000	1281	171.077	23.82	0.027658	1.32117e+11	1.32117e+11	3.65409e+09	6.82732e-06	24.5783		1500	1281	422.762	27.8343	0.0446366	1.54245e+11	1.54245e+11	6.88499e+09	1.00427e-05	36.1538			1950	1281	776.7	47.1257	0.0614617	1.74161e+11	1.74161e+11	1.07043e+10	1.27634e-05	45.9483		2450	1281	1199.99	56.9829	0.0814242	1.9629e+11	1.9629e+11	1.59828e+10	1.55551e-05	55.9984		2950	1281	1677.54	67.2321	0.102161
1000	1291	171.629	24.3086	0.027726	1.32117e+11	1.32117e+11	3.66306e+09	6.82694e-06	24.577		1500	1291	423.619	27.3114	0.0447759	1.54245e+11	1.54245e+11	6.90648e+09	1.00414e-05	36.1491			1950	1291	777.866	47.6057	0.0616876	1.74161e+11	1.74161e+11	1.07436e+10	1.27605e-05	45.9377		2450	1291	1201.32	56.82	0.0817663	1.9629e+11	1.9629e+11	1.60499e+10	1.55492e-05	55.977		2950	1291	1679.1	67.0543	0.102631
1000	1301	172.19	23.9057	0.027793	1.32117e+11	1.32117e+11	3.67192e+09	6.82657e-06	24.5757		1500	1301	424.643	27.5257	0.0449138	1.54245e+11	1.54245e+11	6.92775e+09	1.00401e-05	36.1445			1950	1301	778.92	47.1429	0.0619119	1.74161e+11	1.74161e+11	1.07827e+10	1.27576e-05	45.9272		2450	1301	1202.66	56.6914	0.0821063	1.9629e+11	1.9629e+11	1.61167e+10	1.55433e-05	55.9558		2950	1301	1680.64	67.2943	0.103099
1000	1311	172.764	23.8114	0.0278592	1.32117e+11	1.32117e+11	3.68066e+09	6.82621e-06	24.5744		1500	1311	425.432	37.38	0.0450503	1.54245e+11	1.54245e+11	6.9488e+09	1.00389e-05	36.1399			1950	1311	780.046	46.8686	0.0621344	1.74161e+11	1.74161e+11	1.08214e+10	1.27547e-05	45.9168		2450	1311	1203.97	56.9829	0.0824444	1.9629e+11	1.9629e+11	1.6183e+10	1.55374e-05	55.9347		2950	1311	1682.18	67.0886	0.103565
1000	1321	173.276	23.7343	0.0279244	1.32117e+11	1.32117e+11	3.68927e+09	6.82585e-06	24.5731		1500	1321	426.312	37.0714	0.0451854	1.54245e+11	1.54245e+11	6.96965e+09	1.00376e-05	36.1354			1950	1321	781.099	46.2429	0.0623552	1.74161e+11	1.74161e+11	1.08599e+10	1.27518e-05	45.9065		2450	1321	1205.29	56.0143	0.0827805	1.9629e+11	1.9629e+11	1.6249e+10	1.55316e-05	55.9138		2950	1321	1683.79	66.7714	0.104029
1000	1331	173.855	23.4771	0.0279887	1.32117e+11	1.32117e+11	3.69778e+09	6.8255e-06	24.5718		1500	1331	427.123	36.1286	0.0453192	1.54245e+11	1.54245e+11	6.99028e+09	1.00364e-05	36.131			1950	1331	782.168	46.6543	0.0625744	1.74161e+11	1.74161e+11	1.0898e+10	1.2749e-05	45.8962		2450	1331	1206.64	56.6829	0.0831147	1.9629e+11	1.9629e+11	1.63146e+10	1.55258e-05	55.893		2950	1331	1685.36	65.5029	0.104491
1000	1341	174.398	23.1686	0.0280522	1.32117e+11	1.32117e+11	3.70616e+09	6.82515e-06	24.5705		1500	1341	427.944	36.7457	0.0454517	1.54245e+11	1.54245e+11	7.01071e+09	1.00352e-05	36.1265			1950	1341	783.261	46.1657	0.0627919	1.74161e+11	1.74161e+11	1.09359e+10	1.27461e-05	45.8861		2450	1341	1207.85	56.3571	0.083447	1.9629e+11	1.9629e+11	1.63798e+10	1.55201e-05	55.8723		2950	1341	1686.89	63.3943	0.10495
1000	1351	174.929	23.1857	0.0281148	1.32117e+11	1.32117e+11	3.71444e+09	6.8248e-06	24.5693		1500	1351	428.858	34.9457	0.0455828	1.54245e+11	1.54245e+11	7.03094e+09	1.00339e-05	36.1222			1950	1351	784.363	46.4657	0.0630077	1.74161e+11	1.74161e+11	1.09735e+10	1.27433e-05	45.876		2450	1351	1209.27	56.22	0.0837773	1.9629e+11	1.9629e+11	1.64447e+10	1.55144e-05	55.8518		2950	1351	1688.28	62.8714	0.105407
1000	1361	175.467	22.9714	0.0281766	1.32117e+11	1.32117e+11	3.7226e+09	6.82446e-06	24.5681		1500	1361	429.719	35.1686	0.0457126	1.54245e+11	1.54245e+11	7.05096e+09	1.00327e-05	36.1178			1950	1361	785.432	46.6286	0.0632219	1.74161e+11	1.74161e+11	1.10108e+10	1.27405e-05	45.866		2450	1361	1210.54	56.1686	0.0841058	1.9629e+11	1.9629e+11	1.65092e+10	1.55087e-05	55.8314		2950	1361	1689.58	62.9486	0.105863
1000	1371	175.981	23.1857	0.0282376	1.32117e+11	1.32117e+11	3.73065e+09	6.82412e-06	24.5668		1500	1371	430.389	35.2714	0.0458412	1.54245e+11	1.54245e+11	7.07079e+09	1.00315e-05	36.1136			1950	1371	786.52	45.8679	0.0634345	1.74161e+11	1.74161e+11	1.10478e+10	1.27378e-05	45.856		2450	1371	1211.85	56.88	0.0844324	1.9629e+11	1.9629e+11	1.65733e+10	1.55031e-05	55.8111		2950	1371	1691.13	63.2657	0.106316
1000	1381	176.535	23.2543	0.0282977	1.32117e+11	1.32117e+11	3.7386e+09	6.82379e-06	24.5657		1500	1381	431.226	34.5086	0.0459684	1.54245e+11	1.54245e+11	7.09042e+09	1.00304e-05	36.1093			1950	1381	795.08	45.9536	0.0636455	1.74161e+11	1.74161e+11	1.10846e+10	1.27351e-05	45.8462		2450	1381	1213.19	56.5886	0.0847572	1.9629e+11	1.9629e+11	1.6637e+10	1.54975e-05	55.791		2950	1381	1692.71	63.78	0.106767
1000	1391	177.103	23.3743	0.0283571	1.32117e+11	1.32117e+11	3.74644e+09	6.82347e-06	24.5645		1500	1391	432.059	33.9107	0.0460945	1.54245e+11	1.54245e+11	7.10986e+09	1.00292e-05	36.1051			1950	1391	796.102	46.1464	0.063855	1.74161e+11	1.74161e+11	1.11211e+10	1.27323e-05	45.8364		2450	1391	1214.49	57.1071	0.0850802	1.9629e+11	1.9629e+11	1.67004e+10	1.54919e-05	55.7709		2950	1391	1694.27	65.6057	0.107217
1000	1401	177.642	23.7107	0.0284156	1.32117e+11	1.32117e+11	3.75417e+09	6.82314e-06	24.5633		1500	1401	432.884	35.6464	0.0462192	1.54245e+11	1.54245e+11	7.12911e+09	1.0028e-05	36.1009			1950	1401	797.212	46.8857	0.0640629	1.74161e+11	1.74161e+11	1.11573e+10	1.27296e-05	45.8267		2450	1401	1215.87	58.0179	0.0854014	1.9629e+11	1.9629e+11	1.67635e+10	1.54864e-05	55.751		2950	1401	1695.72	65.2886	0.107664
1000	1411	178.194	23.4964	0.0284734	1.32117e+11	1.32117e+11	3.7618e+09	6.82283e-06	24.5622		1500	1411	434.122	36.6214	0.0463428	1.54245e+11	1.54245e+11	7.14817e+09	1.00269e-05	36.0968			1950	1411	798.299	46.8943	0.0642692	1.74161e+11	1.74161e+11	1.11932e+10	1.2727e-05	45.8171		2450	1411	1211.77	57.9107	0.0857208	1.9629e+11	1.9629e+11	1.68262e+10	1.54809e-05	55.7313		2950	1411	1697.23	64.98	0.108109
1000	1421	186.139	23.0786	0.0285303	1.32117e+11	1.32117e+11	3.76933e+09	6.82251e-06	24.561		1500	1421	434.954	37.2857	0.0464651	1.54245e+11	1.54245e+11	7.16704e+09	1.00258e-05	36.0928			1950	1421	799.456	47.7514	0.064474	1.74161e+11	1.74161e+11	1.12289e+10	1.27243e-05	45.8075		2450	1421	1213.17	59.025	0.0860384	1.9629e+11	1.9629e+11	1.68885e+10	1.54755e-05	55.7116		2950	1421	1698.75	64.9543	0.108553
1000	1431	186.673	22.1571	0.0285866	1.32117e+11	1.32117e+11	3.77676e+09	6.8222e-06	24.5599		1500	1431	435.882	36.375	0.0465863	1.54245e+11	1.54245e+11	7.18573e+09	1.00246e-05	36.0887			1950	1431	800.551	47.3657	0.0646774	1.74161e+11	1.74161e+11	1.12643e+10	1.27217e-05	45.7981		2450	1431	1214.5	58.9929	0.0863543	1.9629e+11	1.9629e+11	1.69505e+10	1.547e-05	55.6921		2950	1431	1700.29	65.4686	0.108994
1000	1441	187.202	22.1036	0.028642	1.32117e+11	1.32117e+11	3.78409e+09	6.8219e-06	24.5588		1500	1441	436.777	35.5543	0.0467063	1.54245e+11	1.54245e+11	7.20423e+09	1.00235e-05	36.0847			1950	1441	801.673	47.3486	0.0648792	1.74161e+11	1.74161e+11	1.12995e+10	1.27191e-05	45.7887		2450	1441	1215.9	57.96	0.0866685	1.9629e+11	1.9629e+11	1.70122e+10	1.54646e-05	55.6727		2950	1441	1701.85	65.9229	0.109434
1000	1451	187.655	21.7971	0.0286968	1.32117e+11	1.32117e+11	3.79132e+09	6.8216e-06	24.5578		1500	1451	437.517	34.3286	0.0468251	1.54245e+11	1.54245e+11	7.22256e+09	1.00224e-05	36.0808			1950	1451	802.738	45.9686	0.0650796	1.74161e+11	1.74161e+11	1.13344e+10	1.27165e-05	45.7793		2450	1451	1217.28	57.3	0.0869809	1.9629e+11	1.9629e+11	1.70735e+10	1.54593e-05	55.6534		2950	1451	1703.36	65.7943	0.109871
1000	1461	188.202	22.2171	0.0287508	1.32117e+11	1.32117e+11	3.79846e+09	6.8213e-06	24.5567		1500	1461	438.27	34.1314	0.0469427	1.54245e+11	1.54245e+11	7.24071e+09	1.00214e-05	36.0769			1950	1461	803.823	46.2257	0.0652785	1.74161e+11	1.74161e+11	1.1369e+10	1.27139e-05	45.7701		2450	1461	1218.53	56.0829	0.0872917	1.9629e+11	1.9629e+11	1.71345e+10	1.5454e-05	55.6343		2950	1461	1704.92	65.9143	0.110307
1000	1471	188.682	22.56	0.0288041	1.32117e+11	1.32117e+11	3.8055e+09	6.82101e-06	24.5556		1500	1471	438.959	33.7029	0.0470593	1.54245e+11	1.54245e+11	7.25868e+09	1.00203e-05	36.073			1950	1471	804.819	45.54	0.065476	1.74161e+11	1.74161e+11	1.14034e+10	1.27114e-05	45.7609		2450	1471	1219.85	57.6171	0.0876008	1.9629e+11	1.9629e+11	1.71952e+10	1.54487e-05	55.6152		2950	1471	1706.42	66.0343	0.110741
1000	1481	189.265	23.5371	0.0288567	1.32117e+11	1.32117e+11	3.81244e+09	6.82072e-06	24.5546		1500	1481	439.864	34.8857	0.0471747	1.54245e+11	1.54245e+11	7.27648e+09	1.00192e-05	36.0691			1950	1481	805.944	45.4886	0.065672	1.74161e+11	1.74161e+11	1.14375e+10	1.27088e-05	45.7518		2450	1481	1221.04	57.6943	0.0879083	1.9629e+11	1.9629e+11	1.72556e+10	1.54434e-05	55.5963		2950	1481	1707.98	65.8543	0.111173
1000	1491	189.834	23.7343	0.0289086	1.32117e+11	1.32117e+11	3.8193e+09	6.82043e-06	24.5536		1500	1491	440.709	36.0429	0.0472889	1.54245e+11	1.54245e+11	7.2941e+09	1.00182e-05	36.0653			1950	1491	806.986	45.66	0.0658667	1.74161e+11	1.74161e+11	1.14714e+10	1.27063e-05	45.7428		2450	1491	1222.62	58.1057	0.0882141	1.9629e+11	1.9629e+11	1.73156e+10	1.54382e-05	55.5775		2950	1491	1709.55	65.3229	0.111604
1000	1501	190.401	24.7457	0.0289598	1.32117e+11	1.32117e+11	3.82606e+09	6.82015e-06	24.5525		1500	1501	441.587	37.1057	0.0474021	1.54245e+11	1.54245e+11	7.31156e+09	1.00171e-05	36.0616			1950	1501	808.045	46.3457	0.0660599	1.74161e+11	1.74161e+11	1.15051e+10	1.27038e-05	45.7338		2450	1501	1224.01	56.9571	0.0885183	1.9629e+11	1.9629e+11	1.73753e+10	1.5433e-05	55.5587		2950	1501	1711.04	65.3057	0.112032
1000	1511	190.971	24.4286	0.0290103	1.32117e+11	1.32117e+11	3.83274e+09	6.81987e-06	24.5515		1500	1511	442.475	36.9086	0.0475142	1.54245e+11	1.54245e+11	7.32885e+09	1.00161e-05	36.0579			1950	1511	809.15	45.7629	0.0662518	1.74161e+11	1.74161e+11	1.15385e+10	1.27014e-05	45.7249		2450	1511	1225.31	55.8429	0.0888209	1.9629e+11	1.9629e+11	1.74347e+10	1.54278e-05	55.5401		2950	1511	1712.55	64.8514	0.112459
1000	1521	191.569	24.72	0.0290601	1.32117e+11	1.32117e+11	3.83933e+09	6.8196e-06	24.5506		1500	1521	443.288	36.9257	0.0476252	1.54245e+11	1.54245e+11	7.34598e+09	1.0015e-05	36.0542			1950	1521	810.226	46.1486	0.0664423	1.74161e+11	1.74161e+11	1.15717e+10	1.26989e-05	45.716		2450	1521	1226.5	53.9314	0.0891219	1.9629e+11	1.9629e+11	1.74938e+10	1.54227e-05	55.5217		2950	1521	1714.04	64.3971	0.112884
1000	1531	192.115	25.0114	0.0291093	1.32117e+11	1.32117e+11	3.84583e+09	6.81933e-06	24.5496		1500	1531	444.17	36.8143	0.0477352	1.54245e+11	1.54245e+11	7.36294e+09	1.0014e-05	36.0505			1950	1531	811.283	46.4229	0.0666314	1.74161e+11	1.74161e+11	1.16046e+10	1.26965e-05	45.7072		2450	1531	1227.56	53.7857	0.0894213	1.9629e+11	1.9629e+11	1.75525e+10	1.54176e-05	55.5033		2950	1531	1715.54	64.6629	0.113307
1000	1541	192.718	25.02	0.0291579	1.32117e+11	1.32117e+11	3.85224e+09	6.81906e-06	24.5486		1500	1541	445.017	36.48	0.0478441	1.54245e+11	1.54245e+11	7.37974e+09	1.0013e-05	36.0469			1950	1541	812.37	46.5686	0.0668193	1.74161e+11	1.74161e+11	1.16373e+10	1.2694e-05	45.6985		2450	1541	1228.91	54.0686	0.0897192	1.9629e+11	1.9629e+11	1.7611e+10	1.54125e-05	55.485		2950	1541	1717.06	64.8086	0.113729
1000	1551	193.319	24.5143	0.0292058	1.32117e+11	1.32117e+11	3.85857e+09	6.8188e-06	24.5477		1500	1551	445.882	37.0286	0.047952	1.54245e+11	1.54245e+11	7.39638e+09	1.0012e-05	36.0433			1950	1551	813.461	46.4486	0.0670057	1.74161e+11	1.74161e+11	1.16698e+10	1.26916e-05	45.6899		2450	1551	1230.28	55.26	0.0900155	1.9629e+11	1.9629e+11	1.76692e+10	1.54075e-05	55.4668		2950	1551	1718.58	64.9821	0.114148
1000	1561	193.89	24.5057	0.0292531	1.32117e+11	1.32117e+11	3.86482e+09	6.81854e-06	24.5467		1500	1561	446.731	36.8657	0.0480589	1.54245e+11	1.54245e+11	7.41286e+09	1.0011e-05	36.0398			1950	1561	814.583	46.86	0.0671909	1.74161e+11	1.74161e+11	1.17021e+10	1.26893e-05	45.6813		2450	1561	1231.62	57.1114	0.0903103	1.9629e+11	1.9629e+11	1.7727e+10	1.54024e-05	55.4488		2950	1561	1720.11	64.7571	0.114567
1000	1571	194.429	24.2657	0.0292997	1.32117e+11	1.32117e+11	3.87098e+09	6.81828e-06	24.5458		1500	1571	447.608	37.0029	0.0481647	1.54245e+11	1.54245e+11	7.42919e+09	1.00101e-05	36.0362			1950	1571	815.645	46.0457	0.0673748	1.74161e+11	1.74161e+11	1.17341e+10	1.26869e-05	45.6728		2450	1571	1232.95	56.2457	0.0906036	1.9629e+11	1.9629e+11	1.77846e+10	1.53975e-05	55.4308		2950	1571	1733.75	63.9	0.114983
1000	1581	194.974	23.9829	0.0293458	1.32117e+11	1.32117e+11	3.87706e+09	6.81803e-06	24.5449		1500	1581	448.471	37.02	0.0482695	1.54245e+11	1.54245e+11	7.44536e+09	1.00091e-05	36.0328			1950	1581	816.75	46.4657	0.0675574	1.74161e+11	1.74161e+11	1.17659e+10	1.26845e-05	45.6643		2450	1581	1234.22	56.1686	0.0908954	1.9629e+11	1.9629e+11	1.78419e+10	1.53925e-05	55.413		2950	1581	1735.23	63.1286	0.115398
1000	1591	195.549	23.8457	0.0293912	1.32117e+11	1.32117e+11	3.88307e+09	6.81778e-06	24.544		1500	1591	449.334	37.08	0.0483734	1.54245e+11	1.54245e+11	7.46138e+09	1.00081e-05	36.0293			1950	1591	817.742	45.9343	0.0677387	1.74161e+11	1.74161e+11	1.17975e+10	1.26822e-05	45.6559		2450	1591	1235.47	55.8257	0.0911857	1.9629e+11	1.9629e+11	1.78989e+10	1.53876e-05	55.3952		2950	1591	1736.67	62.85	0.115811
1000	1601	196.117	23.9914	0.0294361	1.32117e+11	1.32117e+11	3.88899e+09	6.81753e-06	24.5431		1500	1601	450.201	36.6857	0.0484763	1.54245e+11	1.54245e+11	7.47725e+09	1.00072e-05	36.0259			1950	1601	818.882	45.8143	0.0679188	1.74161e+11	1.74161e+11	1.18288e+10	1.26799e-05	45.6476		2450	1601	1236.84	55.8086	0.0914745	1.9629e+11	1.9629e+11	1.79556e+10	1.53827e-05	55.3776		2950	1601	1738.12	62.9571	0.116222
1000	1611	196.672	23.8286	0.0294803	1.32117e+11	1.32117e+11	3.89484e+09	6.81729e-06	24.5422		1500	1611	451.057	36.6086	0.0485782	1.54245e+11	1.54245e+11	7.49296e+09	1.00063e-05	36.0225			1950	1611	819.942	45.4114	0.0680977	1.74161e+11	1.74161e+11	1.186e+10	1.26776e-05	45.6393		2450	1611	1238.13	56.4	0.0917619	1.9629e+11	1.9629e+11	1.8012e+10	1.53778e-05	55.36		2950	1611	1739.62	63.66	0.116632
1000	1621	197.228	23.7	0.029524	1.32117e+11	1.32117e+11	3.90061e+09	6.81705e-06	24.5414		1500	1621	451.888	36.6257	0.0486791	1.54245e+11	1.54245e+11	7.50854e+09	1.00053e-05	36.0192			1950	1621	820.99	46.0714	0.0682752	1.74161e+11	1.74161e+11	1.18909e+10	1.26753e-05	45.6311		2450	1621	1239.46	57.1629	0.0920478	1.9629e+11	1.9629e+11	1.80681e+10	1.53729e-05	55.3426		2950	1621	1741.1	64.1743	0.11704
1000	1631	197.754	23.1514	0.0295671	1.32117e+11	1.32117e+11	3.9063e+09	6.81681e-06	24.5405		1500	1631	452.742	36.2057	0.0487791	1.54245e+11	1.54245e+11	7.52396e+09	1.00044e-05	36.0159			1950	1631	822.048	45.3943	0.0684516	1.74161e+11	1.74161e+11	1.19216e+10	1.2673e-05	45.623		2450	1631	1240.8	56.82	0.0923323	1.9629e+11	1.9629e+11	1.81239e+10	1.53681e-05	55.3252		2950	1631	1742.66	64.38	0.117447
1000	1641	198.314	23.2886	0.0296096	1.32117e+11	1.32117e+11	3.91192e+09	6.81658e-06	24.5397		1500	1641	453.607	36.6514	0.0488782	1.54245e+11	1.54245e+11	7.53924e+09	1.00035e-05	36.0126			1950	1641	823.117	45.6943	0.0686268	1.74161e+11	1.74161e+11	1.19521e+10	1.26708e-05	45.6149		2450	1641	1242.14	57.0857	0.0926154	1.9629e+11	1.9629e+11	1.81795e+10	1.53633e-05	55.308		2950	1641	1744.16	64.3714	0.117852
1000	1651	198.818	23.2629	0.0296516	1.32117e+11	1.32117e+11	3.91747e+09	6.81635e-06	24.5389		1500	1651	454.425	36.3771	0.0489764	1.54245e+11	1.54245e+11	7.55438e+09	1.00026e-05	36.0093			1950	1651	824.178	45.8143	0.0688008	1.74161e+11	1.74161e+11	1.19824e+10	1.26686e-05	45.6068		2450	1651	1243.47	57.1457	0.0928971	1.9629e+11	1.9629e+11	1.82348e+10	1.53586e-05	55.2908		2950	1651	1745.63	64.7657	0.118256
1000	1661	199.389	23.76	0.029693	1.32117e+11	1.32117e+11	3.92294e+09	6.81612e-06	24.538		1500	1661	455.333	36.6	0.0490736	1.54245e+11	1.54245e+11	7.56938e+09	1.00017e-05	36.0061			1950	1661	825.273	45.7543	0.0689736	1.74161e+11	1.74161e+11	1.20125e+10	1.26663e-05	45.5989		2450	1661	1244.8	56.9057	0.0931774	1.9629e+11	1.9629e+11	1.82898e+10	1.53538e-05	55.2738		2950	1661	1747.13	64.1314	0.118658
1000	1671	199.942	23.8286	0.0297339	1.32117e+11	1.32117e+11	3.92835e+09	6.8159e-06	24.5372		1500	1671	456.132	36.4286	0.0491699	1.54245e+11	1.54245e+11	7.58424e+09	1.00008e-05	36.0029			1950	1671	826.335	45.7393	0.0691452	1.74161e+11	1.74161e+11	1.20424e+10	1.26641e-05	45.5909		2450	1671	1246.12	56.5886	0.0934563	1.9629e+11	1.9629e+11	1.83446e+10	1.53491e-05	55.2568		2950	1671	1748.65	64.0029	0.119058
1000	1681	200.526	24.5571	0.0297743	1.32117e+11	1.32117e+11	3.93368e+09	6.81567e-06	24.5364		1500	1681	457.012	36.8486	0.0492653	1.54245e+11	1.54245e+11	7.59896e+09	9.99993e-06	35.9997			1950	1681	827.386	45.6857	0.0693156	1.74161e+11	1.74161e+11	1.20721e+10	1.2662e-05	45.5831		2450	1681	1247.44	56.2286	0.0937339	1.9629e+11	1.9629e+11	1.83991e+10	1.53444e-05	55.2399		2950	1681	1750.14	64.2257	0.119457
1000	1691	201.094	24.5314	0.0298141	1.32117e+11	1.32117e+11	3.93894e+09	6.81545e-06	24.5356		1500	1691	457.857	36.6171	0.0493599	1.54245e+11	1.54245e+11	7.61354e+09	9.99906e-06	35.9966			1950	1691	825.017	45.6857	0.0694849	1.74161e+11	1.74161e+11	1.21016e+10	1.26598e-05	45.5753		2450	1691	1248.75	56.1514	0.0940101	1.9629e+11	1.9629e+11	1.84533e+10	1.53398e-05	55.2231		2950	1691	1751.63	64.0457	0.119855
1000	1701	201.683	24.5314	0.0298535	1.32117e+11	1.32117e+11	3.94414e+09	6.81524e-06	24.5349		1500	1701	458.724	36.0171	0.0494536	1.54245e+11	1.54245e+11	7.62799e+09	9.9982e-06	35.9935			1950	1701	826.073	45.8571	0.0696531	1.74161e+11	1.74161e+11	1.21309e+10	1.26576e-05	45.5675		2450	1701	1250.03	55.8686	0.0942849	1.9629e+11	1.9629e+11	1.85072e+10	1.53351e-05	55.2064		2950	1701	1753.13	63.6	0.12025
1000	1711	202.251	24.1286	0.0298923	1.32117e+11	1.32117e+11	3.94927e+09	6.81503e-06	24.5341		1500	1711	459.605	36.0171	0.0495464	1.54245e+11	1.54245e+11	7.6423e+09	9.99734e-06	35.9904			1950	1711	827.168	46.8321	0.0698201	1.74161e+11	1.74161e+11	1.216e+10	1.26555e-05	45.5598		2450	1711	1251.35	55.6714	0.0945584	1.9629e+11	1.9629e+11	1.85609e+10	1.53305e-05	55.1898		2950	1711	1754.6	63.7629	0.120645
1000	1721	202.804	24.3343	0.0299306	1.32117e+11	1.32117e+11	3.95433e+09	6.81482e-06	24.5333		1500	1721	460.334	35.7343	0.0496383	1.54245e+11	1.54245e+11	7.65649e+09	9.9965e-06	35.9874			1950	1721	828.246	46.74	0.0699861	1.74161e+11	1.74161e+11	1.21889e+10	1.26534e-05	45.5522		2450	1721	1252.64	55.5	0.0948306	1.9629e+11	1.9629e+11	1.86143e+10	1.53259e-05	55.1733		2950	1721	1756.07	64.0114	0.121038
1000	1731	203.341	24.1371	0.0299684	1.32117e+11	1.32117e+11	3.95932e+09	6.81461e-06	24.5326		1500	1731	461.214	35.64	0.0497294	1.54245e+11	1.54245e+11	7.67054e+09	9.99566e-06	35.9844			1950	1731	829.388	47.8114	0.0701509	1.74161e+11	1.74161e+11	1.22176e+10	1.26513e-05	45.5446		2450	1731	1253.93	55.6371	0.0951016	1.9629e+11	1.9629e+11	1.86675e+10	1.53214e-05	55.1569		2950	1731	1757.58	63.9514	0.121429
1000	1741	203.933	24.0086	0.0300057	1.32117e+11	1.32117e+11	3.96425e+09	6.8144e-06	24.5318		1500	1741	462.026	35.04	0.0498197	1.54245e+11	1.54245e+11	7.68447e+09	9.99483e-06	35.9814			1950	1741	830.47	47.9143	0.0703146	1.74161e+11	1.74161e+11	1.22461e+10	1.26492e-05	45.537		2450	1741	1255.22	55.4143	0.0953712	1.9629e+11	1.9629e+11	1.87204e+10	1.53168e-05	55.1406		2950	1741	1759.09	64.1357	0.121819
1000	1751	204.499	23.5971	0.0300425	1.32117e+11	1.32117e+11	3.96912e+09	6.8142e-06	24.5311		1500	1751	462.882	36.1029	0.0499092	1.54245e+11	1.54245e+11	7.69826e+09	9.99401e-06	35.9784			1950	1751	831.651	46.7486	0.0704772	1.74161e+11	1.74161e+11	1.22744e+10	1.26471e-05	45.5295		2450	1751	1256.52	55.1357	0.0956395	1.9629e+11	1.9629e+11	1.87731e+10	1.53123e-05	55.1243		2950	1751	1760.59	65.4429	0.122208
1000	1761	205.052	24.0943	0.0300789	1.32117e+11	1.32117e+11	3.97392e+09	6.814e-06	24.5304		1500	1761	463.693	35.7	0.0499978	1.54245e+11	1.54245e+11	7.71193e+09	9.99319e-06	35.9755			1950	1761	832.758	48.8057	0.0706388	1.74161e+11	1.74161e+11	1.23026e+10	1.2645e-05	45.5221		2450	1761	1265.97	56.0036	0.0959066	1.9629e+11	1.9629e+11	1.88255e+10	1.53078e-05	55.1082		2950	1761	1755.94	65.1107	0.122595
1000	1771	205.557	23.9571	0.0301148	1.32117e+11	1.32117e+11	3.97866e+09	6.8138e-06	24.5297		1500	1771	464.546	36.8786	0.0500856	1.54245e+11	1.54245e+11	7.72548e+09	9.99239e-06	35.9726			1950	1771	833.7	48.1629	0.0707993	1.74161e+11	1.74161e+11	1.23305e+10	1.2643e-05	45.5147		2450	1771	1267.24	56.1857	0.0961724	1.9629e+11	1.9629e+11	1.88777e+10	1.53034e-05	55.0921		2950	1771	1757.53	64.8536	0.122981
1000	1781	206.152	23.7086	0.0301502	1.32117e+11	1.32117e+11	3.98334e+09	6.81361e-06	24.529		1500	1781	469.665	36.6107	0.0501726	1.54245e+11	1.54245e+11	7.7389e+09	9.99159e-06	35.9697			1950	1781	835.082	47.4857	0.0709587	1.74161e+11	1.74161e+11	1.23583e+10	1.26409e-05	45.5074		2450	1781	1268.61	56.4321	0.0964369	1.9629e+11	1.9629e+11	1.89296e+10	1.52989e-05	55.0761		2950	1781	1759.01	65.1643	0.123365
1000	1791	206.728	23.8543	0.0301852	1.32117e+11	1.32117e+11	3.98796e+09	6.81342e-06	24.5283		1500	1791	470.587	37.6821	0.0502588	1.54245e+11	1.54245e+11	7.7522e+09	9.99079e-06	35.9669			1950	1791	836.089	47.5029	0.0711171	1.74161e+11	1.74161e+11	1.23859e+10	1.26389e-05	45.5001		2450	1791	1269.92	56.1514	0.0967002	1.9629e+11	1.9629e+11	1.89813e+10	1.52945e-05	55.0602		2950	1791	1760.5	65.3743	0.123748
1000	1801	207.265	24.4457	0.0302197	1.32117e+11	1.32117e+11	3.99252e+09	6.81323e-06	24.5276		1500	1801	471.418	36.1179	0.0503443	1.54245e+11	1.54245e+11	7.76538e+09	9.99001e-06	35.964			1950	1801	837.191	48.0686	0.0712745	1.74161e+11	1.74161e+11	1.24133e+10	1.26369e-05	45.4929		2450	1801	1271.24	55.9886	0.0969623	1.9629e+11	1.9629e+11	1.90328e+10	1.52901e-05	55.0444		2950	1801	1762.02	63	0.12413
1000	1811	207.835	23.9657	0.0302538	1.32117e+11	1.32117e+11	3.99702e+09	6.81304e-06	24.5269		1500	1811	472.329	35.3486	0.0504289	1.54245e+11	1.54245e+11	7.77843e+09	9.98923e-06	35.9612			1950	1811	838.3	43.3114	0.0714308	1.74161e+11	1.74161e+11	1.24405e+10	1.26349e-05	45.4857		2450	1811	1272.52	55.02	0.0972232	1.9629e+11	1.9629e+11	1.9084e+10	1.52857e-05	55.0286		2950	1811	1763.57	65.0057	0.12451
1000	1821	208.409	23.82	0.0302874	1.32117e+11	1.32117e+11	4.00146e+09	6.81286e-06	24.5263		1500	1821	473.036	36.6171	0.0505128	1.54245e+11	1.54245e+11	7.79137e+09	9.98846e-06	35.9585			1950	1821	839.308	44.1257	0.0715861	1.74161e+11	1.74161e+11	1.24675e+10	1.26329e-05	45.4786		2450	1821	1273.77	54.42	0.0974828	1.9629e+11	1.9629e+11	1.91349e+10	1.52814e-05	55.013		2950	1821	1764.88	65.4514	0.124889
1000	1831	208.948	23.8629	0.0303206	1.32117e+11	1.32117e+11	4.00585e+09	6.81267e-06	24.5256		1500	1831	473.789	36.4714	0.050596	1.54245e+11	1.54245e+11	7.8042e+09	9.9877e-06	35.9557			1950	1831	840.135	44.3571	0.0717404	1.74161e+11	1.74161e+11	1.24944e+10	1.2631e-05	45.4715		2450	1831	1275.03	54.2229	0.0977413	1.9629e+11	1.9629e+11	1.91857e+10	1.52771e-05	54.9974		2950	1831	1766.6	64.44	0.125267
1000	1841	209.507	23.4343	0.0303533	1.32117e+11	1.32117e+11	4.01018e+09	6.81249e-06	24.525		1500	1841	474.859	36.2571	0.0506783	1.54245e+11	1.54245e+11	7.8169e+09	9.98694e-06	35.953			1950	1841	841.237	44.0571	0.0718937	1.74161e+11	1.74161e+11	1.25211e+10	1.2629e-05	45.4644		2450	1841	1276.27	54.7371	0.0979986	1.9629e+11	1.9629e+11	1.92362e+10	1.52728e-05	54.9819		2950	1841	1768.14	60.7371	0.125643
1000	1851	210.049	23.2714	0.0303857	1.32117e+11	1.32117e+11	4.01445e+09	6.81232e-06	24.5243		1500	1851	475.673	37.3114	0.05076	1.54245e+11	1.54245e+11	7.8295e+09	9.98619e-06	35.9503			1950	1851	842.366	45.0514	0.072046	1.74161e+11	1.74161e+11	1.25476e+10	1.26271e-05	45.4574		2450	1851	1277.56	54.9943	0.0982547	1.9629e+11	1.9629e+11	1.92864e+10	1.52685e-05	54.9665		2950	1851	1769.54	62.8971	0.126018
1000	1861	210.569	23.4943	0.0304176	1.32117e+11	1.32117e+11	4.01867e+09	6.81214e-06	24.5237		1500	1861	476.559	36.96	0.0508409	1.54245e+11	1.54245e+11	7.84198e+09	9.98545e-06	35.9476			1950	1861	843.44	47.0486	0.0721974	1.74161e+11	1.74161e+11	1.2574e+10	1.26251e-05	45.4505		2450	1861	1278.91	55.3714	0.0985096	1.9629e+11	1.9629e+11	1.93365e+10	1.52642e-05	54.9512		2950	1861	1770.65	61.5343	0.126392
1000	1871	211.124	23.5457	0.0304491	1.32117e+11	1.32117e+11	4.02283e+09	6.81197e-06	24.5231		1500	1871	477.389	34.3371	0.0509211	1.54245e+11	1.54245e+11	7.85434e+09	9.98471e-06	35.945			1950	1871	844.564	46.7657	0.0723477	1.74161e+11	1.74161e+11	1.26002e+10	1.26232e-05	45.4436		2450	1871	1280.19	55.6971	0.0987634	1.9629e+11	1.9629e+11	1.93863e+10	1.526e-05	54.9359		2950	1871	1772.22	61.0371	0.126764
1000	1881	211.689	23.3914	0.0304802	1.32117e+11	1.32117e+11	4.02695e+09	6.8118e-06	24.5225		1500	1881	478.101	32.6743	0.0510005	1.54245e+11	1.54245e+11	7.8666e+09	9.98399e-06	35.9423			1950	1881	845.624	46.1914	0.0724971	1.74161e+11	1.74161e+11	1.26262e+10	1.26213e-05	45.4368		2450	1881	1281.49	55.62	0.099016	1.9629e+11	1.9629e+11	1.94359e+10	1.52558e-05	54.9207		2950	1881	1773.77	61.4829	0.127135
1000	1891	212.254	23.7343	0.030511	1.32117e+11	1.32117e+11	4.031e+09	6.81163e-06	24.5219		1500	1891	478.865	32.8114	0.0510793	1.54245e+11	1.54245e+11	7.87874e+09	9.98326e-06	35.9397			1950	1891	846.693	45.9943	0.0726456	1.74161e+11	1.74161e+11	1.26521e+10	1.26194e-05	45.43		2450	1891	1282.76	55.5771	0.0992675	1.9629e+11	1.9629e+11	1.94853e+10	1.52516e-05	54.9056		2950	1891	1775.26	64.4657	0.127505
1000	1901	212.778	23.5886	0.0305413	1.32117e+11	1.32117e+11	4.03501e+09	6.81146e-06	24.5213		1500	1901	479.485	32.8714	0.0511573	1.54245e+11	1.54245e+11	7.89078e+09	9.98255e-06	35.9372			1950	1901	847.755	45.5743	0.0727931	1.74161e+11	1.74161e+11	1.26778e+10	1.26176e-05	45.4232		2450	1901	1284.05	55.3286	0.0995179	1.9629e+11	1.9629e+11	1.95344e+10	1.52474e-05	54.8906		2950	1901	1776.71	63.7543	0.127873
1000	1911	213.338	23.1	0.0305712	1.32117e+11	1.32117e+11	4.03896e+09	6.8113e-06	24.5207		1500	1911	480.387	34.0971	0.0512346	1.54245e+11	1.54245e+11	7.90271e+09	9.98184e-06	35.9346			1950	1911	848.806	46.2771	0.0729396	1.74161e+11	1.74161e+11	1.27033e+10	1.26157e-05	45.4165		2450	1911	1285.39	55.3371	0.0997671	1.9629e+11	1.9629e+11	1.95833e+10	1.52432e-05	54.8756		2950	1911	1778.17	63.5143	0.12824
1000	1921	213.876	23.1	0.0306008	1.32117e+11	1.32117e+11	4.04287e+09	6.81114e-06	24.5201		1500	1921	481.224	34.2514	0.0513113	1.54245e+11	1.54245e+11	7.91453e+09	9.98114e-06	35.9321			1950	1921	849.881	46.6029	0.0730853	1.74161e+11	1.74161e+11	1.27286e+10	1.26138e-05	45.4098		2450	1921	1286.64	55.6886	0.100015	1.9629e+11	1.9629e+11	1.9632e+10	1.52391e-05	54.8608		2950	1921	1779.66	63.8829	0.128606
1000	1931	214.384	23.4943	0.0306299	1.32117e+11	1.32117e+11	4.04672e+09	6.81098e-06	24.5195		1500	1931	482.079	35.4514	0.0513872	1.54245e+11	1.54245e+11	7.92625e+09	9.98044e-06	35.9296			1950	1931	851.023	46.8514	0.07323	1.74161e+11	1.74161e+11	1.27538e+10	1.2612e-05	45.4032		2450	1931	1287.95	55.44	0.100262	1.9629e+11	1.9629e+11	1.96805e+10	1.5235e-05	54.8459		2950	1931	1781.18	63.8229	0.128971
1000	1941	214.949	23.0314	0.0306587	1.32117e+11	1.32117e+11	4.05052e+09	6.81082e-06	24.5189		1500	1941	482.861	35.0829	0.0514625	1.54245e+11	1.54245e+11	7.93786e+09	9.97975e-06	35.9271			1950	1941	852.13	47.1943	0.0733738	1.74161e+11	1.74161e+11	1.27789e+10	1.26102e-05	45.3966		2450	1941	1289.26	55.3114	0.100508	1.9629e+11	1.9629e+11	1.97288e+10	1.52309e-05	54.8312		2950	1941	1782.71	64.1314	0.129334
1000	1951	215.519	22.9543	0.0306871	1.32117e+11	1.32117e+11	4.05428e+09	6.81066e-06	24.5184		1500	1951	483.621	35.0314	0.0515372	1.54245e+11	1.54245e+11	7.94937e+09	9.97906e-06	35.9246			1950	1951	853.221	47.3657	0.0735167	1.74161e+11	1.74161e+11	1.28038e+10	1.26084e-05	45.3901		2450	1951	1290.52	55.14	0.100753	1.9629e+11	1.9629e+11	1.97769e+10	1.52268e-05	54.8166		2950	1951	1784.16	64.6114	0.129697
1000	1961	216.025	23.3057	0.0307152	1.32117e+11	1.32117e+11	4.05799e+09	6.81051e-06	24.5178		1500	1961	484.48	34.4829	0.0516111	1.54245e+11	1.54245e+11	7.96078e+09	9.97839e-06	35.9222			1950	1961	854.312	46.9629	0.0736587	1.74161e+11	1.74161e+11	1.28285e+10	1.26065e-05	45.3836		2450	1961	1291.84	55.1657	0.100997	1.9629e+11	1.9629e+11	1.98247e+10	1.52228e-05	54.802		2950	1961	1785.66	64.32	0.130058
1000	1971	216.554	23.0143	0.0307429	1.32117e+11	1.32117e+11	4.06165e+09	6.81036e-06	24.5173		1500	1971	485.311	34.5686	0.0516844	1.54245e+11	1.54245e+11	7.97209e+09	9.97772e-06	35.9198			1950	1971	855.407	46.8943	0.0737998	1.74161e+11	1.74161e+11	1.28531e+10	1.26048e-05	45.3771		2450	1971	1293.08	54.78	0.10124	1.9629e+11	1.9629e+11	1.98723e+10	1.52187e-05	54.7875		2950	1971	1787.2	63.7886	0.130417
1000	1981	217.103	23.1686	0.0307703	1.32117e+11	1.32117e+11	4.06526e+09	6.81021e-06	24.5167		1500	1981	486.102	35.3486	0.0517571	1.54245e+11	1.54245e+11	7.98329e+09	9.97705e-06	35.9174			1950	1981	856.502	46.26	0.07394	1.74161e+11	1.74161e+11	1.28775e+10	1.2603e-05	45.3707		2450	1981	1294.38	55.0971	0.101481	1.9629e+11	1.9629e+11	1.99198e+10	1.52147e-05	54.773		2950	1981	1788.69	63.8486	0.130776
1000	1991	217.634	23.5393	0.0307973	1.32117e+11	1.32117e+11	4.06883e+09	6.81006e-06	24.5162		1500	1991	486.894	35.3571	0.0518291	1.54245e+11	1.54245e+11	7.9944e+09	9.97639e-06	35.915			1950	1991	857.601	46.4829	0.0740794	1.74161e+11	1.74161e+11	1.29018e+10	1.26012e-05	45.3643		2450	1991	1295.65	32.24	0.101722	1.9629e+11	1.9629e+11	1.9967e+10	1.52107e-05	54.7586		2950	1991	1790.15	63.9171	0.131134
1000	2001	218.222	23.5714	0.0308239	1.32117e+11	1.32117e+11	4.07235e+09	6.80991e-06	24.5157		1500	2001	487.745	35.5114	0.0519004	1.54245e+11	1.54245e+11	8.00541e+09	9.97574e-06	35.9127			1950	2001	858.618	46.0114	0.0742179	1.74161e+11	1.74161e+11	1.29259e+10	1.25994e-05	45.358		2450	2001	1296.95	32.9429	0.101961	1.9629e+11	1.9629e+11	2.0014e+10	1.52068e-05	54.7443		2950	2001	1791.61	63.0771	0.13149
1000	2011	217.199	25.0071	0.0308502	1.32117e+11	1.32117e+11	4.07583e+09	6.80977e-06	24.5152		1500	2011	488.605	35.8714	0.0519712	1.54245e+11	1.54245e+11	8.01632e+09	9.97509e-06	35.9103			1950	2011	859.735	45.96	0.0743555	1.74161e+11	1.74161e+11	1.29499e+10	1.25977e-05	45.3517		2450	2011	1292.92	33.4914	0.1022	1.9629e+11	1.9629e+11	2.00609e+10	1.52028e-05	54.7301		2950	2011	1793.11	62.8971	0.131845
1000	2021	217.731	25.35	0.0308762	1.32117e+11	1.32117e+11	4.07926e+09	6.80963e-06	24.5147		1500	2021	489.454	36.2229	0.0520413	1.54245e+11	1.54245e+11	8.02713e+09	9.97445e-06	35.908			1950	2021	860.775	45.54	0.0744923	1.74161e+11	1.74161e+11	1.29737e+10	1.2596e-05	45.3455		2450	2021	1294.23	33.6029	0.102437	1.9629e+11	1.9629e+11	2.01075e+10	1.51989e-05	54.7159		2950	2021	1794.56	62.9057	0.132199
1000	2031	218.414	24.8571	0.0309019	1.32117e+11	1.32117e+11	4.08265e+09	6.80949e-06	24.5141		1500	2031	490.287	36.18	0.0521108	1.54245e+11	1.54245e+11	8.03786e+09	9.97381e-06	35.9057			1950	2031	861.864	45.96	0.0746282	1.74161e+11	1.74161e+11	1.29974e+10	1.25942e-05	45.3393		2450	2031	1295.61	33.4143	0.102674	1.9629e+11	1.9629e+11	2.01539e+10	1.5195e-05	54.7018		2950	2031	1796.03	62.88	0.132552
1000	2041	218.977	24.8229	0.0309272	1.32117e+11	1.32117e+11	4.08599e+09	6.80935e-06	24.5136		1500	2041	491.12	36.0429	0.0521797	1.54245e+11	1.54245e+11	8.04848e+09	9.97318e-06	35.9034			1950	2041	862.914	45.5143	0.0747633	1.74161e+11	1.74161e+11	1.30209e+10	1.25925e-05	45.3331		2450	2041	1296.89	57.0086	0.102909	1.9629e+11	1.9629e+11	2.02001e+10	1.51911e-05	54.6878		2950	2041	1797.49	62.7429	0.132903
1000	2051	219.519	26.0143	0.0309522	1.32117e+11	1.32117e+11	4.0893e+09	6.80921e-06	24.5132		1500	2051	491.966	35.6229	0.052248	1.54245e+11	1.54245e+11	8.05901e+09	9.97255e-06	35.9012			1950	2051	863.98	45.36	0.0748976	1.74161e+11	1.74161e+11	1.30443e+10	1.25908e-05	45.327		2450	2051	1298.16	54.5229	0.103144	1.9629e+11	1.9629e+11	2.02461e+10	1.51872e-05	54.6738		2950	2051	1798.94	63.3514	0.133254
1000	2061	220.095	25.4229	0.0309769	1.32117e+11	1.32117e+11	4.09256e+09	6.80907e-06	24.5127		1500	2061	492.81	35.6486	0.0523157	1.54245e+11	1.54245e+11	8.06945e+09	9.97193e-06	35.899			1950	2061	865.045	45.3686	0.075031	1.74161e+11	1.74161e+11	1.30675e+10	1.25891e-05	45.3209		2450	2061	1299.57	53.16	0.103377	1.9629e+11	1.9629e+11	2.0292e+10	1.51833e-05	54.6599		2950	2061	1800.43	63.45	0.133603
1000	2071	220.766	24.9429	0.0310012	1.32117e+11	1.32117e+11	4.09578e+09	6.80894e-06	24.5122		1500	2071	493.61	35.58	0.0523828	1.54245e+11	1.54245e+11	8.0798e+09	9.97132e-06	35.8968			1950	2071	866.067	45.8571	0.0751637	1.74161e+11	1.74161e+11	1.30906e+10	1.25875e-05	45.3149		2450	2071	1300.59	55.2343	0.10361	1.9629e+11	1.9629e+11	2.03376e+10	1.51795e-05	54.6461		2950	2071	1801.95	62.8286	0.133951
1000	2081	221.38	25.3714	0.0310253	1.32117e+11	1.32117e+11	4.09896e+09	6.80881e-06	24.5117		1500	2081	494.446	35.4343	0.0524493	1.54245e+11	1.54245e+11	8.09006e+09	9.97071e-06	35.8946			1950	2081	867.157	45.9	0.0752955	1.74161e+11	1.74161e+11	1.31136e+10	1.25858e-05	45.3088		2450	2081	1301.81	55.7571	0.103841	1.9629e+11	1.9629e+11	2.0383e+10	1.51757e-05	54.6323		2950	2081	1816.06	62.6786	0.134298
1000	2091	221.887	26.46	0.0310491	1.32117e+11	1.32117e+11	4.10209e+09	6.80868e-06	24.5112		1500	2091	495.271	35.2371	0.0525152	1.54245e+11	1.54245e+11	8.10023e+09	9.97011e-06	35.8924			1950	2091	868.264	46.0179	0.0754265	1.74161e+11	1.74161e+11	1.31364e+10	1.25841e-05	45.3029		2450	2091	1303.33	54.5229	0.104072	1.9629e+11	1.9629e+11	2.04283e+10	1.51718e-05	54.6186		2950	2091	1817.47	61.7036	0.134645
1000	2101	222.479	25.38	0.0310725	1.32117e+11	1.32117e+11	4.10519e+09	6.80855e-06	24.5108		1500	2101	496.1	35.3314	0.0525806	1.54245e+11	1.54245e+11	8.11031e+09	9.96951e-06	35.8902			1950	2101	876.832	46.7143	0.0755567	1.74161e+11	1.74161e+11	1.31591e+10	1.25825e-05	45.2969		2450	2101	1304.67	56.1514	0.104301	1.9629e+11	1.9629e+11	2.04734e+10	1.51681e-05	54.605		2950	2101	1818.9	60.6857	0.134989
1000	2111	223.182	25.8943	0.0310957	1.32117e+11	1.32117e+11	4.10825e+09	6.80842e-06	24.5103		1500	2111	496.921	35.16	0.0526453	1.54245e+11	1.54245e+11	8.1203e+09	9.96892e-06	35.8881			1950	2111	877.908	46.7464	0.0756862	1.74161e+11	1.74161e+11	1.31816e+10	1.25808e-05	45.291		2450	2111	1305.93	54.4543	0.10453	1.9629e+11	1.9629e+11	2.05182e+10	1.51643e-05	54.5914		2950	2111	1820.3	61.4314	0.135333
1000	2121	223.727	25.4743	0.0311185	1.32117e+11	1.32117e+11	4.11127e+09	6.8083e-06	24.5099		1500	2121	497.732	35.0314	0.0527096	1.54245e+11	1.54245e+11	8.13021e+09	9.96833e-06	35.886			1950	2121	878.995	46.7464	0.0758148	1.74161e+11	1.74161e+11	1.3204e+10	1.25792e-05	45.2852		2450	2121	1307.15	52.9371	0.104758	1.9629e+11	1.9629e+11	2.05629e+10	1.51605e-05	54.5779		2950	2121	1821.72	61.6629	0.135676
1000	2131	224.401	25.6286	0.0311411	1.32117e+11	1.32117e+11	4.11425e+09	6.80817e-06	24.5094		1500	2131	498.548	35.1771	0.0527732	1.54245e+11	1.54245e+11	8.14003e+09	9.96775e-06	35.8839			1950	2131	880.088	46.1571	0.0759427	1.74161e+11	1.74161e+11	1.32263e+10	1.25776e-05	45.2794		2450	2131	1308.16	53.3657	0.104984	1.9629e+11	1.9629e+11	2.06074e+10	1.51568e-05	54.5645		2950	2131	1823.23	62.16	0.136018
1000	2141	224.859	24.3857	0.0311634	1.32117e+11	1.32117e+11	4.1172e+09	6.80805e-06	24.509		1500	2141	499.358	34.7314	0.0528363	1.54245e+11	1.54245e+11	8.14976e+09	9.96717e-06	35.8818			1950	2141	881.195	46.3886	0.0760698	1.74161e+11	1.74161e+11	1.32484e+10	1.2576e-05	45.2736		2450	2141	1309.51	53.7943	0.10521	1.9629e+11	1.9629e+11	2.06517e+10	1.51531e-05	54.5511		2950	2141	1824.66	62.6057	0.136358
1000	2151	225.469	24.24	0.0311854	1.32117e+11	1.32117e+11	4.1201e+09	6.80793e-06	24.5086		1500	2151	500.204	34.74	0.0528989	1.54245e+11	1.54245e+11	8.15941e+09	9.9666e-06	35.8798			1950	2151	882.217	46.2429	0.0761961	1.74161e+11	1.74161e+11	1.32704e+10	1.25744e-05	45.2678		2450	2151	1310.89	54.2143	0.105435	1.9629e+11	1.9629e+11	2.06959e+10	1.51494e-05	54.5378		2950	2151	1826.16	63.1029	0.136698
1000	2161	226.027	23.22	0.0312071	1.32117e+11	1.32117e+11	4.12297e+09	6.80781e-06	24.5081		1500	2161	500.973	34.8086	0.0529609	1.54245e+11	1.54245e+11	8.16898e+09	9.96603e-06	35.8777			1950	2161	883.32	46.0286	0.0763217	1.74161e+11	1.74161e+11	1.32923e+10	1.25728e-05	45.2621		2450	2161	1312.21	56.7257	0.105659	1.9629e+11	1.9629e+11	2.07398e+10	1.51457e-05	54.5245		2950	2161	1827.61	63.0686	0.137036
1000	2171	226.555	26.9829	0.0312285	1.32117e+11	1.32117e+11	4.12581e+09	6.80769e-06	24.5077		1500	2171	501.785	34.9114	0.0530224	1.54245e+11	1.54245e+11	8.17846e+09	9.96547e-06	35.8757			1950	2171	884.39	45.2571	0.0764465	1.74161e+11	1.74161e+11	1.3314e+10	1.25712e-05	45.2564		2450	2171	1313.47	56.2457	0.105882	1.9629e+11	1.9629e+11	2.07836e+10	1.5142e-05	54.5113		2950	2171	1829.08	63.06	0.137374
1000	2181	227.11	26.7771	0.0312497	1.32117e+11	1.32117e+11	4.12861e+09	6.80758e-06	24.5073		1500	2181	502.609	34.3371	0.0530833	1.54245e+11	1.54245e+11	8.18787e+09	9.96491e-06	35.8737			1950	2181	885.458	45.2657	0.0765706	1.74161e+11	1.74161e+11	1.33356e+10	1.25697e-05	45.2508		2450	2181	1314.78	55.0371	0.106104	1.9629e+11	1.9629e+11	2.08272e+10	1.51384e-05	54.4982		2950	2181	1830.58	62.76	0.13771
1000	2191	228.007	26.9829	0.0312706	1.32117e+11	1.32117e+11	4.13137e+09	6.80746e-06	24.5069		1500	2191	503.431	34.7314	0.0531438	1.54245e+11	1.54245e+11	8.19719e+09	9.96436e-06	35.8717			1950	2191	886.475	44.8114	0.0766939	1.74161e+11	1.74161e+11	1.33571e+10	1.25681e-05	45.2452		2450	2191	1316.07	55.0457	0.106325	1.9629e+11	1.9629e+11	2.08706e+10	1.51347e-05	54.4851		2950	2191	1832.02	62.5629	0.138046
1000	2201	228.593	27.6343	0.0312913	1.32117e+11	1.32117e+11	4.1341e+09	6.80735e-06	24.5065		1500	2201	504.21	34.7143	0.0532037	1.54245e+11	1.54245e+11	8.20643e+09	9.96381e-06	35.8697			1950	2201	887.498	44.7171	0.0768166	1.74161e+11	1.74161e+11	1.33785e+10	1.25666e-05	45.2396		2450	2201	1317.31	55.2257	0.106546	1.9629e+11	1.9629e+11	2.09139e+10	1.51311e-05	54.472		2950	2201	1833.48	62.8029	0.13838
1000	2211	229.175	27.7457	0.0313117	1.32117e+11	1.32117e+11	4.13679e+09	6.80724e-06	24.5061		1500	2211	505.025	35.475	0.0532631	1.54245e+11	1.54245e+11	8.21559e+09	9.96327e-06	35.8678			1950	2211	888.548	44.7343	0.0769384	1.74161e+11	1.74161e+11	1.33997e+10	1.2565e-05	45.2341		2450	2211	1318.63	54.6429	0.106765	1.9629e+11	1.9629e+11	2.09569e+10	1.51275e-05	54.4591		2950	2211	1834.9	61.9714	0.138713
1000	2221	229.779	25.3286	0.0313318	1.32117e+11	1.32117e+11	4.13945e+09	6.80713e-06	24.5057		1500	2221	503.8	35.7429	0.0533219	1.54245e+11	1.54245e+11	8.22467e+09	9.96273e-06	35.8658			1950	2221	889.607	45.48	0.0770596	1.74161e+11	1.74161e+11	1.34208e+10	1.25635e-05	45.2286		2450	2221	1319.91	55.2	0.106983	1.9629e+11	1.9629e+11	2.09998e+10	1.51239e-05	54.4462		2950	2221	1836.41	62.0229	0.139046
1000	2231	230.347	25.7743	0.0313517	1.32117e+11	1.32117e+11	4.14207e+09	6.80702e-06	24.5053		1500	2231	504.695	37.8643	0.0533803	1.54245e+11	1.54245e+11	8.23367e+09	9.9622e-06	35.8639			1950	2231	890.677	45.6514	0.07718	1.74161e+11	1.74161e+11	1.34418e+10	1.2562e-05	45.2231		2450	2231	1321.15	55.8257	0.107201	1.9629e+11	1.9629e+11	2.10425e+10	1.51204e-05	54.4333		2950	2231	1837.81	62.04	0.139377
1000	2241	230.962	24.7543	0.0313713	1.32117e+11	1.32117e+11	4.14466e+09	6.80691e-06	24.5049		1500	2241	505.542	38.0679	0.0534382	1.54245e+11	1.54245e+11	8.2426e+09	9.96167e-06	35.862			1950	2241	891.781	45.6771	0.0772998	1.74161e+11	1.74161e+11	1.34626e+10	1.25605e-05	45.2177		2450	2241	1322.51	55.8171	0.107418	1.9629e+11	1.9629e+11	2.10851e+10	1.51168e-05	54.4205		2950	2241	1839.25	62.3229	0.139707
1000	2251	231.6	23.8971	0.0313906	1.32117e+11	1.32117e+11	4.14722e+09	6.80681e-06	24.5045		1500	2251	506.519	36.5143	0.0534956	1.54245e+11	1.54245e+11	8.25145e+09	9.96115e-06	35.8601			1950	2251	892.824	45.48	0.0774188	1.74161e+11	1.74161e+11	1.34834e+10	1.2559e-05	45.2123		2450	2251	1323.83	55.6457	0.107634	1.9629e+11	1.9629e+11	2.11275e+10	1.51133e-05	54.4078		2950	2251	1840.72	61.7571	0.140037
1000	2261	232.063	23.2714	0.0314098	1.32117e+11	1.32117e+11	4.14975e+09	6.8067e-06	24.5041		1500	2261	507.353	35.5114	0.0535525	1.54245e+11	1.54245e+11	8.26022e+09	9.96063e-06	35.8583			1950	2261	893.877	45.54	0.0775371	1.74161e+11	1.74161e+11	1.3504e+10	1.25575e-05	45.2069		2450	2261	1325.14	56.3057	0.107849	1.9629e+11	1.9629e+11	2.11697e+10	1.51098e-05	54.3951		2950	2261	1842.18	63.4071	0.140365
1000	2271	232.567	22.2771	0.0314287	1.32117e+11	1.32117e+11	4.15225e+09	6.8066e-06	24.5038		1500	2271	508.06	36.0771	0.0536089	1.54245e+11	1.54245e+11	8.26892e+09	9.96011e-06	35.8564			1950	2271	894.913	45.3857	0.0776548	1.74161e+11	1.74161e+11	1.35245e+10	1.2556e-05	45.2016		2450	2271	1326.41	55.14	0.108063	1.9629e+11	1.9629e+11	2.12117e+10	1.51063e-05	54.3825		2950	2271	1837.99	63.7929	0.140692
1000	2281	233.062	22.1743	0.0314473	1.32117e+11	1.32117e+11	4.15471e+09	6.8065e-06	24.5034		1500	2281	508.838	34.8	0.0536648	1.54245e+11	1.54245e+11	8.27755e+09	9.9596e-06	35.8546			1950	2281	895.99	45.6343	0.0777717	1.74161e+11	1.74161e+11	1.35448e+10	1.25545e-05	45.1962		2450	2281	1327.72	55.4657	0.108276	1.9629e+11	1.9629e+11	2.12536e+10	1.51028e-05	54.3699		2950	2281	1839.54	62.5929	0.141019
1000	2291	233.561	22.7743	0.0314657	1.32117e+11	1.32117e+11	4.15714e+09	6.8064e-06	24.503		1500	2291	509.751	35.9914	0.0537202	1.54245e+11	1.54245e+11	8.2861e+09	9.9591e-06	35.8528			1950	2291	897.076	45.6857	0.077888	1.74161e+11	1.74161e+11	1.35651e+10	1.2553e-05	45.191		2450	2291	1328.94	55.0543	0.108489	1.9629e+11	1.9629e+11	2.12953e+10	1.50993e-05	54.3574		2950	2291	1841.02	62.8071	0.141344
1000	2301	234.187	23.5714	0.0314839	1.32117e+11	1.32117e+11	4.15955e+09	6.8063e-06	24.5027		1500	2301	510.579	37.68	0.0537752	1.54245e+11	1.54245e+11	8.29458e+09	9.9586e-06	35.8509			1950	2301	898.148	46.38	0.0780036	1.74161e+11	1.74161e+11	1.35852e+10	1.25516e-05	45.1857		2450	2301	1330.3	55.0629	0.108701	1.9629e+11	1.9629e+11	2.13369e+10	1.50958e-05	54.345		2950	2301	1842.37	62.76	0.141669
1000	2311	234.72	24.2143	0.0315019	1.32117e+11	1.32117e+11	4.16192e+09	6.8062e-06	24.5023		1500	2311	511.552	37.1057	0.0538297	1.54245e+11	1.54245e+11	8.30298e+09	9.9581e-06	35.8492			1950	2311	899.207	45.8743	0.0781185	1.74161e+11	1.74161e+11	1.36052e+10	1.25501e-05	45.1805		2450	2311	1331.56	54.96	0.108911	1.9629e+11	1.9629e+11	2.13783e+10	1.50924e-05	54.3326		2950	2311	1843.85	61.9971	0.141992
1000	2321	235.317	24.9	0.0315196	1.32117e+11	1.32117e+11	4.16426e+09	6.8061e-06	24.502		1500	2321	512.456	35.8286	0.0538837	1.54245e+11	1.54245e+11	8.31132e+09	9.95761e-06	35.8474			1950	2321	900.324	45.5486	0.0782328	1.74161e+11	1.74161e+11	1.36251e+10	1.25487e-05	45.1753		2450	2321	1332.83	55.26	0.109121	1.9629e+11	1.9629e+11	2.14195e+10	1.5089e-05	54.3202		2950	2321	1845.31	61.9114	0.142315
1000	2331	235.887	24.54	0.0315371	1.32117e+11	1.32117e+11	4.16657e+09	6.806e-06	24.5016		1500	2331	513.167	35.9143	0.0539373	1.54245e+11	1.54245e+11	8.31958e+09	9.95712e-06	35.8456			1950	2331	901.342	45.2743	0.0783463	1.74161e+11	1.74161e+11	1.36449e+10	1.25473e-05	45.1702		2450	2331	1334.13	54.7371	0.109331	1.9629e+11	1.9629e+11	2.14606e+10	1.50855e-05	54.3079		2950	2331	1846.78	63.3857	0.142636
1000	2341	236.466	25.0114	0.0315544	1.32117e+11	1.32117e+11	4.16886e+09	6.80591e-06	24.5013		1500	2341	513.931	34.6821	0.0539904	1.54245e+11	1.54245e+11	8.32777e+09	9.95663e-06	35.8439			1950	2341	902.39	45.4371	0.0784593	1.74161e+11	1.74161e+11	1.36646e+10	1.25459e-05	45.1651		2450	2341	1335.39	54.8314	0.109539	1.9629e+11	1.9629e+11	2.15015e+10	1.50821e-05	54.2957		2950	2341	1848.24	62.1	0.142957
1000	2351	237.05	24.5229	0.0315714	1.32117e+11	1.32117e+11	4.17111e+09	6.80582e-06	24.5009		1500	2351	515.104	33.8036	0.0540431	1.54245e+11	1.54245e+11	8.3359e+09	9.95615e-06	35.8421			1950	2351	903.43	44.5114	0.0785716	1.74161e+11	1.74161e+11	1.36841e+10	1.25444e-05	45.16		2450	2351	1336.68	54.9857	0.109747	1.9629e+11	1.9629e+11	2.15422e+10	1.50788e-05	54.2835		2950	2351	1849.76	59.22	0.143277
1000	2361	237.638	23.7514	0.0315883	1.32117e+11	1.32117e+11	4.17334e+09	6.80572e-06	24.5006		1500	2361	515.962	36.0857	0.0540953	1.54245e+11	1.54245e+11	8.34395e+09	9.95567e-06	35.8404			1950	2361	904.508	44.8286	0.0786832	1.74161e+11	1.74161e+11	1.37036e+10	1.2543e-05	45.1549		2450	2361	1337.96	55.0821	0.109953	1.9629e+11	1.9629e+11	2.15828e+10	1.50754e-05	54.2714		2950	2361	1851.09	58.9629	0.143595
1000	2371	238.178	24.0857	0.0316049	1.32117e+11	1.32117e+11	4.17554e+09	6.80563e-06	24.5003		1500	2371	516.784	35.9786	0.0541471	1.54245e+11	1.54245e+11	8.35194e+09	9.9552e-06	35.8387			1950	2371	905.517	44.5971	0.0787942	1.74161e+11	1.74161e+11	1.37229e+10	1.25416e-05	45.1499		2450	2371	1351.26	54.9214	0.110159	1.9629e+11	1.9629e+11	2.16232e+10	1.5072e-05	54.2593		2950	2371	1852.22	59.8114	0.143913
1000	2381	238.658	23.7857	0.0316214	1.32117e+11	1.32117e+11	4.17771e+09	6.80554e-06	24.5		1500	2381	517.708	34.9714	0.0541984	1.54245e+11	1.54245e+11	8.35986e+09	9.95473e-06	35.837			1950	2381	906.572	44.7171	0.0789045	1.74161e+11	1.74161e+11	1.37421e+10	1.25403e-05	45.1449		2450	2381	1352.58	54.3857	0.110365	1.9629e+11	1.9629e+11	2.16635e+10	1.50687e-05	54.2473		2950	2381	1853.65	59.1686	0.14423
1000	2391	239.276	24.06	0.0316376	1.32117e+11	1.32117e+11	4.17985e+09	6.80545e-06	24.4996		1500	2391	518.462	33.4286	0.0542493	1.54245e+11	1.54245e+11	8.36771e+09	9.95427e-06	35.8354			1950	2391	907.593	44.3464	0.0790143	1.74161e+11	1.74161e+11	1.37612e+10	1.25389e-05	45.14		2450	2391	1353.81	54.9321	0.110569	1.9629e+11	1.9629e+11	2.17036e+10	1.50654e-05	54.2353		2950	2391	1855.22	60.1543	0.144546
1000	2401	239.825	24.4029	0.0316536	1.32117e+11	1.32117e+11	4.18197e+09	6.80537e-06	24.4993		1500	2401	519.184	34.14	0.0542998	1.54245e+11	1.54245e+11	8.3755e+09	9.95381e-06	35.8337			1950	2401	908.647	45.3536	0.0791234	1.74161e+11	1.74161e+11	1.37802e+10	1.25375e-05	45.135		2450	2401	1355.06	54.2057	0.110773	1.9629e+11	1.9629e+11	2.17436e+10	1.5062e-05	54.2234		2950	2401	1856.67	62.8371	0.144862
1000	2411	240.445	25.62	0.0316694	1.32117e+11	1.32117e+11	4.18406e+09	6.80528e-06	24.499		1500	2411	519.862	33.9257	0.0543498	1.54245e+11	1.54245e+11	8.38322e+09	9.95335e-06	35.8321			1950	2411	905.875	46.3821	0.0792318	1.74161e+11	1.74161e+11	1.37991e+10	1.25361e-05	45.1301		2450	2411	1356.39	53.7429	0.110975	1.9629e+11	1.9629e+11	2.17834e+10	1.50587e-05	54.2115		2950	2411	1858.11	62.94	0.145176
1000	2421	241.025	25.0457	0.0316851	1.32117e+11	1.32117e+11	4.18612e+09	6.80519e-06	24.4987		1500	2421	520.767	34.4829	0.0543995	1.54245e+11	1.54245e+11	8.39087e+09	9.9529e-06	35.8304			1950	2421	906.978	46.8857	0.0793397	1.74161e+11	1.74161e+11	1.38179e+10	1.25348e-05	45.1252		2450	2421	1357.59	53.9486	0.111178	1.9629e+11	1.9629e+11	2.18231e+10	1.50555e-05	54.1997		2950	2421	1859.55	62.0229	0.145489
1000	2431	241.647	25.62	0.0317005	1.32117e+11	1.32117e+11	4.18816e+09	6.80511e-06	24.4984		1500	2431	521.666	36.0171	0.0544487	1.54245e+11	1.54245e+11	8.39846e+09	9.95245e-06	35.8288			1950	2431	908.129	47.2714	0.0794469	1.74161e+11	1.74161e+11	1.38366e+10	1.25334e-05	45.1204		2450	2431	1358.85	54.5143	0.111379	1.9629e+11	1.9629e+11	2.18626e+10	1.50522e-05	54.1879		2950	2431	1861	62.1086	0.145802
1000	2441	242.198	25.0714	0.0317157	1.32117e+11	1.32117e+11	4.19017e+09	6.80503e-06	24.4981		1500	2441	522.485	37.6457	0.0544975	1.54245e+11	1.54245e+11	8.40599e+09	9.95201e-06	35.8272			1950	2441	909.197	46.3886	0.0795536	1.74161e+11	1.74161e+11	1.38552e+10	1.25321e-05	45.1156		2450	2441	1360.11	54.2143	0.111579	1.9629e+11	1.9629e+11	2.1902e+10	1.50489e-05	54.1762		2950	2441	1862.45	62.3143	0.146113
1000	2451	242.814	24.84	0.0317308	1.32117e+11	1.32117e+11	4.19216e+09	6.80494e-06	24.4978		1500	2451	523.386	36.9343	0.0545459	1.54245e+11	1.54245e+11	8.41345e+09	9.95157e-06	35.8256			1950	2451	910.287	47.8971	0.0796596	1.74161e+11	1.74161e+11	1.38736e+10	1.25308e-05	45.1108		2450	2451	1361.42	54.8571	0.111779	1.9629e+11	1.9629e+11	2.19412e+10	1.50457e-05	54.1645		2950	2451	1863.91	62.2886	0.146424
1000	2461	243.37	24.8657	0.0317456	1.32117e+11	1.32117e+11	4.19412e+09	6.80486e-06	24.4975		1500	2461	524.254	36.3771	0.0545938	1.54245e+11	1.54245e+11	8.42085e+09	9.95113e-06	35.8241			1950	2461	911.287	45.4629	0.079765	1.74161e+11	1.74161e+11	1.3892e+10	1.25294e-05	45.106		2450	2461	1362.71	54.6771	0.111978	1.9629e+11	1.9629e+11	2.19802e+10	1.50425e-05	54.1528		2950	2461	1865.38	62.4686	0.146734
1000	2471	243.923	24.8829	0.0317603	1.32117e+11	1.32117e+11	4.19606e+09	6.80478e-06	24.4972		1500	2471	525.076	36.2229	0.0546414	1.54245e+11	1.54245e+11	8.42819e+09	9.9507e-06	35.8225			1950	2471	912.566	44.3914	0.0798698	1.74161e+11	1.74161e+11	1.39103e+10	1.25281e-05	45.1013		2450	2471	1363.99	55.0286	0.112177	1.9629e+11	1.9629e+11	2.20192e+10	1.50392e-05	54.1413		2950	2471	1866.82	62.4343	0.147043
1000	2481	244.548	24.24	0.0317748	1.32117e+11	1.32117e+11	4.19797e+09	6.8047e-06	24.4969		1500	2481	525.91	36	0.0546886	1.54245e+11	1.54245e+11	8.43547e+09	9.95027e-06	35.821			1950	2481	913.433	43.0714	0.0799741	1.74161e+11	1.74161e+11	1.39284e+10	1.25268e-05	45.0966		2450	2481	1365.22	54.6686	0.112374	1.9629e+11	1.9629e+11	2.2058e+10	1.5036e-05	54.1297		2950	2481	1868.29	62.4343	0.147351
1000	2491	245.101	24.6	0.0317891	1.32117e+11	1.32117e+11	4.19986e+09	6.80462e-06	24.4966		1500	2491	526.711	35.5971	0.0547354	1.54245e+11	1.54245e+11	8.44268e+09	9.94984e-06	35.8194			1950	2491	914.376	46.5086	0.0800777	1.74161e+11	1.74161e+11	1.39465e+10	1.25255e-05	45.0919		2450	2491	1366.53	54.5057	0.112571	1.9629e+11	1.9629e+11	2.20966e+10	1.50328e-05	54.1182		2950	2491	1869.74	62.3743	0.147658
1000	2501	245.642	24.6857	0.0318032	1.32117e+11	1.32117e+11	4.20173e+09	6.80455e-06	24.4964		1500	2501	527.586	35.8886	0.0547818	1.54245e+11	1.54245e+11	8.44984e+09	9.94942e-06	35.8179			1950	2501	915.312	44.3057	0.0801808	1.74161e+11	1.74161e+11	1.39644e+10	1.25242e-05	45.0872		2450	2501	1367.8	53.9829	0.112767	1.9629e+11	1.9629e+11	2.21351e+10	1.50297e-05	54.1068		2950	2501	1871.2	62.3657	0.147965
1000	2511	246.24	24.5829	0.0318171	1.32117e+11	1.32117e+11	4.20357e+09	6.80447e-06	24.4961		1500	2511	528.407	36.2829	0.0548278	1.54245e+11	1.54245e+11	8.45694e+09	9.949e-06	35.8164			1950	2511	916.713	46.0457	0.0802833	1.74161e+11	1.74161e+11	1.39823e+10	1.25229e-05	45.0826		2450	2511	1369.07	54.4971	0.112962	1.9629e+11	1.9629e+11	2.21734e+10	1.50265e-05	54.0954		2950	2511	1872.66	61.6029	0.14827
1000	2521	246.803	24.7029	0.0318309	1.32117e+11	1.32117e+11	4.20539e+09	6.8044e-06	24.4958		1500	2521	529.263	36.4114	0.0548734	1.54245e+11	1.54245e+11	8.46397e+09	9.94858e-06	35.8149			1950	2521	917.735	47.16	0.0803852	1.74161e+11	1.74161e+11	1.4e+10	1.25217e-05	45.078		2450	2521	1370.28	54.0429	0.113157	1.9629e+11	1.9629e+11	2.22116e+10	1.50234e-05	54.0841		2950	2521	1874.09	61.5943	0.148575
1000	2531	247.416	24.6514	0.0318445	1.32117e+11	1.32117e+11	4.20719e+09	6.80432e-06	24.4956		1500	2531	530.143	36.7714	0.0549186	1.54245e+11	1.54245e+11	8.47095e+09	9.94817e-06	35.8134			1950	2531	918.805	47.0829	0.0804866	1.74161e+11	1.74161e+11	1.40177e+10	1.25204e-05	45.0734		2450	2531	1371.58	53.8543	0.113351	1.9629e+11	1.9629e+11	2.22497e+10	1.50202e-05	54.0728		2950	2531	1875.47	61.3886	0.148879
1000	2541	247.983	24.3429	0.0318579	1.32117e+11	1.32117e+11	4.20896e+09	6.80425e-06	24.4953		1500	2541	530.959	36.6686	0.0549635	1.54245e+11	1.54245e+11	8.47787e+09	9.94776e-06	35.8119			1950	2541	919.878	43.0543	0.0805874	1.74161e+11	1.74161e+11	1.40352e+10	1.25191e-05	45.0689		2450	2541	1372.83	53.6314	0.113544	1.9629e+11	1.9629e+11	2.22876e+10	1.50171e-05	54.0615		2950	2541	1876.92	60.7114	0.149182
1000	2551	248.518	24.6343	0.0318712	1.32117e+11	1.32117e+11	4.21071e+09	6.80418e-06	24.495		1500	2551	531.876	36.5143	0.055008	1.54245e+11	1.54245e+11	8.48473e+09	9.94736e-06	35.8105			1950	2551	920.805	43.4829	0.0806876	1.74161e+11	1.74161e+11	1.40527e+10	1.25179e-05	45.0644		2450	2551	1374.08	54.42	0.113737	1.9629e+11	1.9629e+11	2.23254e+10	1.5014e-05	54.0503		2950	2551	1878.36	61.0886	0.149484
1000	2561	249.08	24.0257	0.0318843	1.32117e+11	1.32117e+11	4.21244e+09	6.8041e-06	24.4948		1500	2561	532.685	36.4543	0.0550521	1.54245e+11	1.54245e+11	8.49154e+09	9.94695e-06	35.809			1950	2561	921.736	44.1086	0.0807873	1.74161e+11	1.74161e+11	1.407e+10	1.25166e-05	45.0599		2450	2561	1375.33	54.1886	0.113928	1.9629e+11	1.9629e+11	2.23631e+10	1.50109e-05	54.0392		2950	2561	1879.74	61.5343	0.149786
1000	2571	249.677	24.2314	0.0318972	1.32117e+11	1.32117e+11	4.21415e+09	6.80403e-06	24.4945		1500	2571	533.523	36.7114	0.0550958	1.54245e+11	1.54245e+11	8.49828e+09	9.94656e-06	35.8076			1950	2571	922.808	43.9114	0.0808864	1.74161e+11	1.74161e+11	1.40873e+10	1.25154e-05	45.0554		2450	2571	1376.63	54.7543	0.11412	1.9629e+11	1.9629e+11	2.24006e+10	1.50078e-05	54.0281		2950	2571	1881.22	86.0314	0.150086
1000	2581	250.219	24.6171	0.03191	1.32117e+11	1.32117e+11	4.21584e+09	6.80396e-06	24.4943		1500	2581	534.396	35.8714	0.0551392	1.54245e+11	1.54245e+11	8.50498e+09	9.94616e-06	35.8062			1950	2581	923.951	45.4714	0.080985	1.74161e+11	1.74161e+11	1.41045e+10	1.25142e-05	45.051		2450	2581	1377.9	55.0929	0.11431	1.9629e+11	1.9629e+11	2.24379e+10	1.50047e-05	54.017		2950	2581	1882.65	85.8343	0.150386
1000	2591	250.81	24.66	0.0319226	1.32117e+11	1.32117e+11	4.2175e+09	6.80389e-06	24.494		1500	2591	535.242	36.24	0.0551823	1.54245e+11	1.54245e+11	8.51161e+09	9.94577e-06	35.8048			1950	2591	925.001	46.7571	0.081083	1.74161e+11	1.74161e+11	1.41215e+10	1.25129e-05	45.0466		2450	2591	1379.22	56.8607	0.1145	1.9629e+11	1.9629e+11	2.24752e+10	1.50017e-05	54.006		2950	2591	1895.58	86.1771	0.150685
1000	2601	251.39	24.2143	0.031935	1.32117e+11	1.32117e+11	4.21915e+09	6.80383e-06	24.4938		1500	2601	536.061	35.94	0.0552249	1.54245e+11	1.54245e+11	8.51819e+09	9.94538e-06	35.8034			1950	2601	926.11	46.4743	0.0811805	1.74161e+11	1.74161e+11	1.41385e+10	1.25117e-05	45.0422		2450	2601	1375.28	56.25	0.114689	1.9629e+11	1.9629e+11	2.25123e+10	1.49986e-05	53.995		2950	2601	1896.99	85.2771	0.150983
1000	2611	251.957	24.2571	0.0319473	1.32117e+11	1.32117e+11	4.22077e+09	6.80376e-06	24.4935		1500	2611	536.913	35.8286	0.0552672	1.54245e+11	1.54245e+11	8.52472e+09	9.945e-06	35.802			1950	2611	927.191	45.4286	0.0812774	1.74161e+11	1.74161e+11	1.41554e+10	1.25105e-05	45.0378		2450	2611	1376.69	56.625	0.114877	1.9629e+11	1.9629e+11	2.25493e+10	1.49956e-05	53.9841		2950	2611	1898.42	84.3171	0.151281
1000	2621	252.502	24.4029	0.0319595	1.32117e+11	1.32117e+11	4.22238e+09	6.80369e-06	24.4933		1500	2621	537.716	35.3571	0.0553092	1.54245e+11	1.54245e+11	8.53119e+09	9.94461e-06	35.8006			1950	2621	928.23	45.7286	0.0813738	1.74161e+11	1.74161e+11	1.41722e+10	1.25093e-05	45.0335		2450	2621	1377.94	55.4357	0.115065	1.9629e+11	1.9629e+11	2.25861e+10	1.49925e-05	53.9732		2950	2621	1899.79	60.4286	0.151577
1000	2631	253.049	24.06	0.0319715	1.32117e+11	1.32117e+11	4.22396e+09	6.80363e-06	24.4931		1500	2631	538.576	35.8286	0.0553508	1.54245e+11	1.54245e+11	8.53761e+09	9.94424e-06	35.7992			1950	2631	929.251	45.5657	0.0814697	1.74161e+11	1.74161e+11	1.41889e+10	1.25081e-05	45.0291		2450	2631	1379.24	56.3057	0.115252	1.9629e+11	1.9629e+11	2.26228e+10	1.49895e-05	53.9623		2950	2631	1901.11	60.6857	0.151873
1000	2641	253.657	23.7771	0.0319833	1.32117e+11	1.32117e+11	4.22553e+09	6.80356e-06	24.4928		1500	2641	539.367	35.8886	0.0553921	1.54245e+11	1.54245e+11	8.54398e+09	9.94386e-06	35.7979			1950	2641	930.336	45.9686	0.0815651	1.74161e+11	1.74161e+11	1.42055e+10	1.25069e-05	45.0248		2450	2641	1380.45	53.0571	0.115438	1.9629e+11	1.9629e+11	2.26594e+10	1.49865e-05	53.9515		2950	2641	1902.63	60.7629	0.152168
1000	2651	254.197	24.1543	0.031995	1.32117e+11	1.32117e+11	4.22707e+09	6.8035e-06	24.4926		1500	2651	540.241	35.8886	0.055433	1.54245e+11	1.54245e+11	8.55029e+09	9.94349e-06	35.7966			1950	2651	931.426	46.02	0.0816599	1.74161e+11	1.74161e+11	1.4222e+10	1.25057e-05	45.0206		2450	2651	1381.85	52.38	0.115624	1.9629e+11	1.9629e+11	2.26958e+10	1.49835e-05	53.9407		2950	2651	1904.07	61.4229	0.152462
1000	2661	254.731	23.8543	0.0320066	1.32117e+11	1.32117e+11	4.2286e+09	6.80343e-06	24.4924		1500	2661	541.1	35.4771	0.0554736	1.54245e+11	1.54245e+11	8.55655e+09	9.94312e-06	35.7952			1950	2661	932.554	46.3286	0.0817542	1.74161e+11	1.74161e+11	1.42384e+10	1.25045e-05	45.0163		2450	2661	1382.88	53.9571	0.115809	1.9629e+11	1.9629e+11	2.27321e+10	1.49806e-05	53.93		2950	2661	1905.5	62.4257	0.152756
1000	2671	255.32	23.5286	0.032018	1.32117e+11	1.32117e+11	4.2301e+09	6.80337e-06	24.4921		1500	2671	541.903	35.8714	0.0555139	1.54245e+11	1.54245e+11	8.56276e+09	9.94275e-06	35.7939			1950	2671	933.599	46.3371	0.081848	1.74161e+11	1.74161e+11	1.42548e+10	1.25034e-05	45.0121		2450	2671	1384.05	54.6429	0.115993	1.9629e+11	1.9629e+11	2.27683e+10	1.49776e-05	53.9193		2950	2671	1906.95	60.1714	0.153048
1000	2681	255.832	23.2457	0.0320292	1.32117e+11	1.32117e+11	4.23159e+09	6.80331e-06	24.4919		1500	2681	542.715	35.5114	0.0555538	1.54245e+11	1.54245e+11	8.56892e+09	9.94239e-06	35.7926			1950	2681	934.656	45.9771	0.0819413	1.74161e+11	1.74161e+11	1.4271e+10	1.25022e-05	45.0079		2450	2681	1385.54	54.2743	0.116177	1.9629e+11	1.9629e+11	2.28044e+10	1.49746e-05	53.9087		2950	2681	1908.39	61.5257	0.15334
1000	2691	256.402	23.8971	0.0320404	1.32117e+11	1.32117e+11	4.23306e+09	6.80325e-06	24.4917		1500	2691	543.552	35.2457	0.0555934	1.54245e+11	1.54245e+11	8.57503e+09	9.94203e-06	35.7913			1950	2691	935.742	45.8657	0.0820341	1.74161e+11	1.74161e+11	1.42872e+10	1.2501e-05	45.0037		2450	2691	1386.83	55.08	0.11636	1.9629e+11	1.9629e+11	2.28403e+10	1.49717e-05	53.8981		2950	2691	1909.65	61.6114	0.153632
1000	2701	256.909	23.7086	0.0320513	1.32117e+11	1.32117e+11	4.23451e+09	6.80319e-06	24.4915		1500	2701	544.384	35.4536	0.0556326	1.54245e+11	1.54245e+11	8.58108e+09	9.94167e-06	35.79			1950	2701	936.79	45.8914	0.0821264	1.74161e+11	1.74161e+11	1.43032e+10	1.24999e-05	44.9996		2450	2701	1388.18	53.4943	0.116542	1.9629e+11	1.9629e+11	2.28761e+10	1.49688e-05	53.8876		2950	2701	1911.25	61.5257	0.153922
1000	2711	257.519	23.82	0.0320622	1.32117e+11	1.32117e+11	4.23595e+09	6.80313e-06	24.4913		1500	2711	545.212	36.4714	0.0556716	1.54245e+11	1.54245e+11	8.58709e+09	9.94132e-06	35.7887			1950	2711	937.905	45.9857	0.0822181	1.74161e+11	1.74161e+11	1.43192e+10	1.24987e-05	44.9955		2450	2711	1389.31	52.2343	0.116724	1.9629e+11	1.9629e+11	2.29118e+10	1.49658e-05	53.8771		2950	2711	1912.69	61.2771	0.154212
1000	2721	258.086	23.6679	0.0320729	1.32117e+11	1.32117e+11	4.23736e+09	6.80307e-06	24.4911		1500	2721	551.497	34.3286	0.0557102	1.54245e+11	1.54245e+11	8.59305e+09	9.94097e-06	35.7875			1950	2721	938.953	46.0286	0.0823094	1.74161e+11	1.74161e+11	1.43351e+10	1.24976e-05	44.9914		2450	2721	1390.29	52.5171	0.116905	1.9629e+11	1.9629e+11	2.29473e+10	1.49629e-05	53.8666		2950	2721	1914.13	62.6743	0.1545
1000	2731	258.611	24.3143	0.0320835	1.32117e+11	1.32117e+11	4.23876e+09	6.80301e-06	24.4908		1500	2731	552.404	34.8214	0.0557485	1.54245e+11	1.54245e+11	8.59896e+09	9.94062e-06	35.7862			1950	2731	940.021	46.1143	0.0824002	1.74161e+11	1.74161e+11	1.43509e+10	1.24965e-05	44.9873		2450	2731	1391.63	51.72	0.117085	1.9629e+11	1.9629e+11	2.29828e+10	1.496e-05	53.8562		2950	2731	1915.54	59.5543	0.154789
1000	2741	263.102	23.1714	0.0320939	1.32117e+11	1.32117e+11	4.24014e+09	6.80296e-06	24.4906		1500	2741	553.041	33.8679	0.0557865	1.54245e+11	1.54245e+11	8.60482e+09	9.94027e-06	35.785			1950	2741	941.112	45.5829	0.0824905	1.74161e+11	1.74161e+11	1.43667e+10	1.24953e-05	44.9832		2450	2741	1392.95	52.9971	0.117265	1.9629e+11	1.9629e+11	2.30181e+10	1.49572e-05	53.8458		2950	2741	1916.96	60.8657	0.155076
1000	2751	263.539	23.9143	0.0321042	1.32117e+11	1.32117e+11	4.2415e+09	6.8029e-06	24.4904		1500	2751	553.919	36.1714	0.0558242	1.54245e+11	1.54245e+11	8.61063e+09	9.93993e-06	35.7837			1950	2751	942.17	45.78	0.0825803	1.74161e+11	1.74161e+11	1.43823e+10	1.24942e-05	44.9792		2450	2751	1394.21	55.4657	0.117445	1.9629e+11	1.9629e+11	2.30532e+10	1.49543e-05	53.8354		2950	2751	1918.2	60.7543	0.155363
1000	2761	264.069	24.7714	0.0321144	1.32117e+11	1.32117e+11	4.24285e+09	6.80284e-06	24.4902		1500	2761	554.658	35.7343	0.0558616	1.54245e+11	1.54245e+11	8.61639e+09	9.93959e-06	35.7825			1950	2761	943.223	45.0257	0.0826696	1.74161e+11	1.74161e+11	1.43979e+10	1.24931e-05	44.9752		2450	2761	1395.49	54.5829	0.117623	1.9629e+11	1.9629e+11	2.30883e+10	1.49514e-05	53.8251		2950	2761	1919.79	61.0371	0.155648
1000	2771	264.688	25.6179	0.0321245	1.32117e+11	1.32117e+11	4.24418e+09	6.80279e-06	24.49		1500	2771	555.717	37.5771	0.0558986	1.54245e+11	1.54245e+11	8.62211e+09	9.93925e-06	35.7813			1950	2771	944.294	45.0943	0.0827585	1.74161e+11	1.74161e+11	1.44133e+10	1.2492e-05	44.9712		2450	2771	1396.76	54.0686	0.117801	1.9629e+11	1.9629e+11	2.31232e+10	1.49486e-05	53.8148		2950	2771	1921.22	35.2029	0.155934
1000	2781	265.273	24.8229	0.0321344	1.32117e+11	1.32117e+11	4.24549e+09	6.80273e-06	24.4898		1500	2781	556.573	37.1486	0.0559354	1.54245e+11	1.54245e+11	8.62778e+09	9.93892e-06	35.7801			1950	2781	945.274	45.0086	0.0828468	1.74161e+11	1.74161e+11	1.44287e+10	1.24909e-05	44.9672		2450	2781	1398	54.12	0.117978	1.9629e+11	1.9629e+11	2.3158e+10	1.49457e-05	53.8046		2950	2781	1922.66	37.0029	0.156218
1000	2791	265.93	24.8657	0.0321443	1.32117e+11	1.32117e+11	4.24679e+09	6.80268e-06	24.4897		1500	2791	557.425	36.8314	0.0559719	1.54245e+11	1.54245e+11	8.63341e+09	9.93859e-06	35.7789			1950	2791	946.373	44.8371	0.0829347	1.74161e+11	1.74161e+11	1.4444e+10	1.24898e-05	44.9633		2450	2791	1399.26	54.3429	0.118155	1.9629e+11	1.9629e+11	2.31927e+10	1.49429e-05	53.7944		2950	2791	1917.89	35.8971	0.156502
1000	2801	266.435	24.3771	0.0321539	1.32117e+11	1.32117e+11	4.24807e+09	6.80263e-06	24.4895		1500	2801	558.253	33.54	0.056008	1.54245e+11	1.54245e+11	8.63898e+09	9.93826e-06	35.7777			1950	2801	947.421	44.6571	0.0830221	1.74161e+11	1.74161e+11	1.44593e+10	1.24887e-05	44.9594		2450	2801	1400.53	54.0171	0.118331	1.9629e+11	1.9629e+11	2.32273e+10	1.49401e-05	53.7843		2950	2801	1919.33	35.8629	0.156785
1000	2811	266.97	23.5371	0.0321635	1.32117e+11	1.32117e+11	4.24933e+09	6.80258e-06	24.4893		1500	2811	558.955	32.6057	0.0560439	1.54245e+11	1.54245e+11	8.64452e+09	9.93793e-06	35.7766			1950	2811	948.454	45.3214	0.0831091	1.74161e+11	1.74161e+11	1.44744e+10	1.24876e-05	44.9555		2450	2811	1401.83	54.7457	0.118507	1.9629e+11	1.9629e+11	2.32618e+10	1.49373e-05	53.7742		2950	2811	1920.8	35.6571	0.157067
1000	2821	267.532	24.8657	0.032173	1.32117e+11	1.32117e+11	4.25058e+09	6.80252e-06	24.4891		1500	2821	559.63	32.3314	0.0560795	1.54245e+11	1.54245e+11	8.65e+09	9.93761e-06	35.7754			1950	2821	949.504	44.7	0.0831956	1.74161e+11	1.74161e+11	1.44895e+10	1.24865e-05	44.9516		2450	2821	1403.06	54.6857	0.118682	1.9629e+11	1.9629e+11	2.32961e+10	1.49345e-05	53.7641		2950	2821	1922.22	62.16	0.157349
1000	2831	268.019	25.2514	0.0321823	1.32117e+11	1.32117e+11	4.25182e+09	6.80247e-06	24.4889		1500	2831	560.377	32.9057	0.0561147	1.54245e+11	1.54245e+11	8.65544e+09	9.93729e-06	35.7742			1950	2831	957.473	44.6143	0.0832816	1.74161e+11	1.74161e+11	1.45044e+10	1.24855e-05	44.9477		2450	2831	1404.39	54.5486	0.118856	1.9629e+11	1.9629e+11	2.33303e+10	1.49317e-05	53.7541		2950	2831	1923.64	61.4914	0.157629
1000	2841	268.831	25.9629	0.0321915	1.32117e+11	1.32117e+11	4.25303e+09	6.80242e-06	24.4887		1500	2841	561.197	33.7457	0.0561497	1.54245e+11	1.54245e+11	8.66084e+09	9.93697e-06	35.7731			1950	2841	958.514	45.1071	0.0833672	1.74161e+11	1.74161e+11	1.45193e+10	1.24844e-05	44.9439		2450	2841	1405.64	54.3686	0.11903	1.9629e+11	1.9629e+11	2.33644e+10	1.49289e-05	53.7441		2950	2841	1925.14	58.86	0.15791
1000	2851	269.381	25.5857	0.0322006	1.32117e+11	1.32117e+11	4.25424e+09	6.80237e-06	24.4885		1500	2851	562.092	35.2286	0.0561844	1.54245e+11	1.54245e+11	8.6662e+09	9.93665e-06	35.772			1950	2851	959.554	45.2679	0.0834523	1.74161e+11	1.74161e+11	1.45342e+10	1.24833e-05	44.9401		2450	2851	1406.89	54.8143	0.119203	1.9629e+11	1.9629e+11	2.33984e+10	1.49261e-05	53.7341		2950	2851	1926.51	58.4143	0.158189
1000	2861	269.999	25.7914	0.0322096	1.32117e+11	1.32117e+11	4.25542e+09	6.80232e-06	24.4884		1500	2861	562.892	35.3571	0.0562189	1.54245e+11	1.54245e+11	8.67151e+09	9.93634e-06	35.7708			1950	2861	960.633	45.42	0.083537	1.74161e+11	1.74161e+11	1.45489e+10	1.24823e-05	44.9363		2450	2861	1408.17	54.6771	0.119376	1.9629e+11	1.9629e+11	2.34323e+10	1.49234e-05	53.7242		2950	2861	1927.67	58.7486	0.158468
1000	2871	270.517	24.3771	0.0322185	1.32117e+11	1.32117e+11	4.2566e+09	6.80227e-06	24.4882		1500	2871	563.74	35.5971	0.056253	1.54245e+11	1.54245e+11	8.67677e+09	9.93603e-06	35.7697			1950	2871	961.698	45.7629	0.0836212	1.74161e+11	1.74161e+11	1.45636e+10	1.24812e-05	44.9325		2450	2871	1409.46	54.4971	0.119548	1.9629e+11	1.9629e+11	2.3466e+10	1.49206e-05	53.7143		2950	2871	1929.04	58.2429	0.158746
1000	2881	271.028	23.8886	0.0322273	1.32117e+11	1.32117e+11	4.25776e+09	6.80223e-06	24.488		1500	2881	564.502	34.7229	0.0562869	1.54245e+11	1.54245e+11	8.682e+09	9.93572e-06	35.7686			1950	2881	962.772	46.2514	0.0837049	1.74161e+11	1.74161e+11	1.45782e+10	1.24802e-05	44.9287		2450	2881	1410.77	54.3943	0.119719	1.9629e+11	1.9629e+11	2.34997e+10	1.49179e-05	53.7044		2950	2881	1930.49	58.9886	0.159023
1000	2891	271.675	22.8257	0.0322359	1.32117e+11	1.32117e+11	4.2589e+09	6.80218e-06	24.4878		1500	2891	565.35	34.8771	0.0563205	1.54245e+11	1.54245e+11	8.68718e+09	9.93542e-06	35.7675			1950	2891	963.853	45.66	0.0837883	1.74161e+11	1.74161e+11	1.45927e+10	1.24792e-05	44.925		2450	2891	1412	54.2914	0.11989	1.9629e+11	1.9629e+11	2.35332e+10	1.49152e-05	53.6946		2950	2891	1931.94	61.68	0.1593
1000	2901	272.168	22.5257	0.0322445	1.32117e+11	1.32117e+11	4.26003e+09	6.80213e-06	24.4877		1500	2901	566.143	34.6971	0.0563538	1.54245e+11	1.54245e+11	8.69232e+09	9.93512e-06	35.7664			1950	2901	964.95	45.2571	0.0838711	1.74161e+11	1.74161e+11	1.46071e+10	1.24781e-05	44.9213		2450	2901	1413.24	53.7429	0.12006	1.9629e+11	1.9629e+11	2.35666e+10	1.49125e-05	53.6849		2950	2901	1933.39	62.4771	0.159576
1000	2911	272.662	21.4371	0.0322529	1.32117e+11	1.32117e+11	4.26115e+09	6.80209e-06	24.4875		1500	2911	566.961	35.4857	0.0563868	1.54245e+11	1.54245e+11	8.69742e+09	9.93482e-06	35.7653			1950	2911	965.96	44.6057	0.0839536	1.74161e+11	1.74161e+11	1.46215e+10	1.24771e-05	44.9176		2450	2911	1414.51	53.0143	0.12023	1.9629e+11	1.9629e+11	2.35999e+10	1.49098e-05	53.6751		2950	2911	1934.86	62.4343	0.159851
1000	2921	273.145	20.9571	0.0322613	1.32117e+11	1.32117e+11	4.26225e+09	6.80204e-06	24.4873		1500	2921	567.788	35.3914	0.0564196	1.54245e+11	1.54245e+11	8.70247e+09	9.93452e-06	35.7643			1950	2921	966.978	44.5886	0.0840356	1.74161e+11	1.74161e+11	1.46358e+10	1.24761e-05	44.9139		2450	2921	1415.73	53.0057	0.120399	1.9629e+11	1.9629e+11	2.36331e+10	1.49071e-05	53.6654		2950	2921	1936.33	62.2114	0.160126
1000	2931	273.529	21.7543	0.0322695	1.32117e+11	1.32117e+11	4.26334e+09	6.802e-06	24.4872		1500	2931	568.642	35.6571	0.0564521	1.54245e+11	1.54245e+11	8.70749e+09	9.93422e-06	35.7632			1950	2931	967.976	43.6114	0.0841172	1.74161e+11	1.74161e+11	1.465e+10	1.24751e-05	44.9103		2450	2931	1416.95	53.6057	0.120567	1.9629e+11	1.9629e+11	2.36662e+10	1.49044e-05	53.6558		2950	2931	1937.78	61.3886	0.1604
1000	2941	274.12	21.9686	0.0322776	1.32117e+11	1.32117e+11	4.26441e+09	6.80195e-06	24.487		1500	2941	569.479	36.0429	0.0564844	1.54245e+11	1.54245e+11	8.71246e+09	9.93393e-06	35.7621			1950	2941	969.055	43.8086	0.0841984	1.74161e+11	1.74161e+11	1.46641e+10	1.24741e-05	44.9066		2450	2941	1418.18	53.3786	0.120735	1.9629e+11	1.9629e+11	2.36992e+10	1.49017e-05	53.6461		2950	2941	1939.19	60.8829	0.160673
1000	2951	274.706	22.6114	0.0322857	1.32117e+11	1.32117e+11	4.26547e+09	6.80191e-06	24.4869		1500	2951	570.303	36.0771	0.0565164	1.54245e+11	1.54245e+11	8.7174e+09	9.93364e-06	35.7611			1950	2951	970.038	44.3143	0.0842791	1.74161e+11	1.74161e+11	1.46782e+10	1.24731e-05	44.903		2450	2951	1419.49	53.7214	0.120903	1.9629e+11	1.9629e+11	2.3732e+10	1.4899e-05	53.6365		2950	2951	1940.55	60.9257	0.160945
1000	2961	275.225	24.3429	0.0322936	1.32117e+11	1.32117e+11	4.26652e+09	6.80186e-06	24.4867		1500	2961	571.166	35.64	0.0565481	1.54245e+11	1.54245e+11	8.72229e+09	9.93335e-06	35.7601			1950	2961	971.071	44.8543	0.0843594	1.74161e+11	1.74161e+11	1.46922e+10	1.24721e-05	44.8994		2450	2961	1430.31	54.4607	0.121069	1.9629e+11	1.9629e+11	2.37648e+10	1.48964e-05	53.627		2950	2961	1941.97	60.66	0.161217
1000	2971	275.783	23.7257	0.0323015	1.32117e+11	1.32117e+11	4.26756e+09	6.80182e-06	24.4866		1500	2971	571.997	35.6743	0.0565796	1.54245e+11	1.54245e+11	8.72715e+09	9.93306e-06	35.759			1950	2971	972.148	44.3657	0.0844393	1.74161e+11	1.74161e+11	1.47061e+10	1.24711e-05	44.8958		2450	2971	1431.57	55.0286	0.121236	1.9629e+11	1.9629e+11	2.37974e+10	1.48937e-05	53.6175		2950	2971	1943.43	60.6	0.161489
1000	2981	276.369	23.76	0.0323092	1.32117e+11	1.32117e+11	4.26858e+09	6.80178e-06	24.4864		1500	2981	572.8	35.4514	0.0566108	1.54245e+11	1.54245e+11	8.73196e+09	9.93278e-06	35.758			1950	2981	973.209	44.8714	0.0845188	1.74161e+11	1.74161e+11	1.47199e+10	1.24701e-05	44.8923		2450	2981	1432.86	54.3857	0.121401	1.9629e+11	1.9629e+11	2.38299e+10	1.48911e-05	53.608		2950	2981	1944.85	61.1143	0.161759
1000	2991	276.888	24.1714	0.0323168	1.32117e+11	1.32117e+11	4.26959e+09	6.80174e-06	24.4863		1500	2991	573.641	35.4257	0.0566418	1.54245e+11	1.54245e+11	8.73674e+09	9.9325e-06	35.757			1950	2991	974.231	45	0.0845978	1.74161e+11	1.74161e+11	1.47337e+10	1.24691e-05	44.8887		2450	2991	1434.14	53.9657	0.121567	1.9629e+11	1.9629e+11	2.38624e+10	1.48885e-05	53.5985		2950	2991	1946.26	61.1057	0.162029
1000	3001	277.478	23.82	0.0323244	1.32117e+11	1.32117e+11	4.27059e+09	6.80169e-06	24.4861		1500	3001	574.439	35.3743	0.0566725	1.54245e+11	1.54245e+11	8.74148e+09	9.93222e-06	35.756			1950	3001	975.273	44.8543	0.0846765	1.74161e+11	1.74161e+11	1.47474e+10	1.24681e-05	44.8852		2450	3001	1435.39	53.8457	0.121731	1.9629e+11	1.9629e+11	2.38947e+10	1.48859e-05	53.5891		2950	3001	1947.68	60.7457	0.162298
1000	3011	278.045	23.5629	0.0323318	1.32117e+11	1.32117e+11	4.27157e+09	6.80165e-06	24.486		1500	3011	575.299	35.2371	0.056703	1.54245e+11	1.54245e+11	8.74617e+09	9.93194e-06	35.755			1950	3011	976.321	44.5714	0.0847547	1.74161e+11	1.74161e+11	1.4761e+10	1.24671e-05	44.8817		2450	3011	1436.61	53.2114	0.121895	1.9629e+11	1.9629e+11	2.39269e+10	1.48833e-05	53.5797		2950	3011	1949.09	60.7286	0.162567
1000	3021	278.562	23.6743	0.0323392	1.32117e+11	1.32117e+11	4.27255e+09	6.80161e-06	24.4858		1500	3021	576.124	35.2457	0.0567332	1.54245e+11	1.54245e+11	8.75084e+09	9.93167e-06	35.754			1950	3021	977.381	44.5114	0.0848325	1.74161e+11	1.74161e+11	1.47746e+10	1.24662e-05	44.8782		2450	3021	1437.85	52.8	0.122059	1.9629e+11	1.9629e+11	2.3959e+10	1.48807e-05	53.5703		2950	3021	1950.52	60.8829	0.162835
1000	3031	279.118	23.2543	0.0323465	1.32117e+11	1.32117e+11	4.27351e+09	6.80157e-06	24.4857		1500	3031	576.911	35.5371	0.0567632	1.54245e+11	1.54245e+11	8.75546e+09	9.9314e-06	35.753			1950	3031	978.409	44.6486	0.0849099	1.74161e+11	1.74161e+11	1.4788e+10	1.24652e-05	44.8748		2450	3031	1439.07	52.5771	0.122222	1.9629e+11	1.9629e+11	2.3991e+10	1.48781e-05	53.561		2950	3031	1951.94	60.78	0.163102
1000	3041	279.65	23.4771	0.0323537	1.32117e+11	1.32117e+11	4.27446e+09	6.80153e-06	24.4855		1500	3041	577.753	35.1429	0.0567929	1.54245e+11	1.54245e+11	8.76005e+09	9.93113e-06	35.7521			1950	3041	979.424	45.0171	0.084987	1.74161e+11	1.74161e+11	1.48015e+10	1.24643e-05	44.8713		2450	3041	1440.3	52.8343	0.122385	1.9629e+11	1.9629e+11	2.40229e+10	1.48755e-05	53.5517		2950	3041	1953.37	60.6857	0.163369
1000	3051	280.191	23.7771	0.0323608	1.32117e+11	1.32117e+11	4.27539e+09	6.8015e-06	24.4854		1500	3051	578.585	34.9286	0.0568224	1.54245e+11	1.54245e+11	8.7646e+09	9.93086e-06	35.7511			1950	3051	980.482	44.8029	0.0850636	1.74161e+11	1.74161e+11	1.48148e+10	1.24633e-05	44.8679		2450	3051	1441.52	53.0743	0.122547	1.9629e+11	1.9629e+11	2.40547e+10	1.48729e-05	53.5425		2950	3051	1954.77	60.2657	0.163635
1000	3061	280.784	23.7943	0.0323678	1.32117e+11	1.32117e+11	4.27632e+09	6.80146e-06	24.4852		1500	3061	579.399	34.9371	0.0568517	1.54245e+11	1.54245e+11	8.76911e+09	9.93059e-06	35.7501			1950	3061	981.573	44.7343	0.0851398	1.74161e+11	1.74161e+11	1.48281e+10	1.24624e-05	44.8645		2450	3061	1442.77	53.4771	0.122708	1.9629e+11	1.9629e+11	2.40864e+10	1.48704e-05	53.5333		2950	3061	1956.17	60.2657	0.163901
1000	3071	281.336	24.3686	0.0323747	1.32117e+11	1.32117e+11	4.27723e+09	6.80142e-06	24.4851		1500	3071	580.199	34.7743	0.0568807	1.54245e+11	1.54245e+11	8.77359e+09	9.93033e-06	35.7492			1950	3071	982.608	45.0429	0.0852157	1.74161e+11	1.74161e+11	1.48413e+10	1.24614e-05	44.8611		2450	3071	1444.04	53.6914	0.122869	1.9629e+11	1.9629e+11	2.4118e+10	1.48678e-05	53.5241		2950	3071	1957.55	59.7	0.164165
1000	3081	281.894	24.6857	0.0323815	1.32117e+11	1.32117e+11	4.27814e+09	6.80138e-06	24.485		1500	3081	580.987	34.44	0.0569095	1.54245e+11	1.54245e+11	8.77803e+09	9.93007e-06	35.7483			1950	3081	983.628	44.64	0.0852911	1.74161e+11	1.74161e+11	1.48544e+10	1.24605e-05	44.8577		2450	3081	1445.31	54.0171	0.123029	1.9629e+11	1.9629e+11	2.41495e+10	1.48653e-05	53.5149		2950	3081	1958.97	60.1371	0.16443
1000	3091	282.493	24.2229	0.0323883	1.32117e+11	1.32117e+11	4.27903e+09	6.80135e-06	24.4848		1500	3091	581.81	34.44	0.056938	1.54245e+11	1.54245e+11	8.78243e+09	9.92981e-06	35.7473			1950	3091	984.679	44.1771	0.0853662	1.74161e+11	1.74161e+11	1.48675e+10	1.24596e-05	44.8544		2450	3091	1446.57	54.1286	0.123189	1.9629e+11	1.9629e+11	2.41809e+10	1.48627e-05	53.5058		2950	3091	1960.33	60.1886	0.164693
1000	3101	283.071	24.0686	0.0323949	1.32117e+11	1.32117e+11	4.27991e+09	6.80131e-06	24.4847		1500	3101	582.603	34.1143	0.0569664	1.54245e+11	1.54245e+11	8.7868e+09	9.92955e-06	35.7464			1950	3101	985.69	44.2286	0.0854408	1.74161e+11	1.74161e+11	1.48805e+10	1.24586e-05	44.8511		2450	3101	1447.83	53.8714	0.123349	1.9629e+11	1.9629e+11	2.42121e+10	1.48602e-05	53.4967		2950	3101	1961.79	60.4821	0.164956
1000	3111	283.61	24.3686	0.0324015	1.32117e+11	1.32117e+11	4.28078e+09	6.80127e-06	24.4846		1500	3111	583.417	34.4657	0.0569945	1.54245e+11	1.54245e+11	8.79114e+09	9.9293e-06	35.7455			1950	3111	986.727	44.3486	0.0855151	1.74161e+11	1.74161e+11	1.48934e+10	1.24577e-05	44.8477		2450	3111	1449.09	53.6057	0.123507	1.9629e+11	1.9629e+11	2.42433e+10	1.48577e-05	53.4877		2950	3111	1963.2	60.3857	0.165218
1000	3121	284.144	23.9743	0.032408	1.32117e+11	1.32117e+11	4.28164e+09	6.80124e-06	24.4845		1500	3121	584.179	34.6543	0.0570223	1.54245e+11	1.54245e+11	8.79544e+09	9.92905e-06	35.7446			1950	3121	987.768	44.0657	0.085589	1.74161e+11	1.74161e+11	1.49063e+10	1.24568e-05	44.8444		2450	3121	1450.32	53.5971	0.123666	1.9629e+11	1.9629e+11	2.42744e+10	1.48552e-05	53.4787		2950	3121	1974.48	60.9536	0.16548
1000	3131	284.737	23.4257	0.0324144	1.32117e+11	1.32117e+11	4.28249e+09	6.8012e-06	24.4843		1500	3131	585.008	34.8214	0.05705	1.54245e+11	1.54245e+11	8.7997e+09	9.9288e-06	35.7437			1950	3131	988.802	44.25	0.0856626	1.74161e+11	1.74161e+11	1.49191e+10	1.24559e-05	44.8412		2450	3131	1451.56	53.5714	0.123824	1.9629e+11	1.9629e+11	2.43054e+10	1.48527e-05	53.4697		2950	3131	1975.89	60.1821	0.165741
1000	3141	285.29	23.5543	0.0324208	1.32117e+11	1.32117e+11	4.28332e+09	6.80117e-06	24.4842		1500	3141	585.853	35.4857	0.0570774	1.54245e+11	1.54245e+11	8.80393e+09	9.92855e-06	35.7428			1950	3141	989.82	44.9143	0.0857357	1.74161e+11	1.74161e+11	1.49319e+10	1.2455e-05	44.8379		2450	3141	1452.82	53.3743	0.123981	1.9629e+11	1.9629e+11	2.43363e+10	1.48502e-05	53.4607		2950	3141	1977.3	59.6679	0.166002
1000	3151	285.804	23.8114	0.032427	1.32117e+11	1.32117e+11	4.28415e+09	6.80113e-06	24.4841		1500	3151	584.508	36.15	0.0571046	1.54245e+11	1.54245e+11	8.80813e+09	9.9283e-06	35.7419			1950	3151	987.058	45.3964	0.0858085	1.74161e+11	1.74161e+11	1.49445e+10	1.24541e-05	44.8346		2450	3151	1454.08	53.0314	0.124138	1.9629e+11	1.9629e+11	2.43671e+10	1.48477e-05	53.4518		2950	3151	1978.69	59.3657	0.166261
1000	3161	286.358	23.7171	0.0324332	1.32117e+11	1.32117e+11	4.28497e+09	6.8011e-06	24.484		1500	3161	585.384	37.65	0.0571316	1.54245e+11	1.54245e+11	8.81229e+09	9.92805e-06	35.741			1950	3161	988.157	46.7679	0.0858809	1.74161e+11	1.74161e+11	1.49571e+10	1.24532e-05	44.8314		2450	3161	1455.32	52.7143	0.124294	1.9629e+11	1.9629e+11	2.43977e+10	1.48452e-05	53.4429		2950	3161	1980.05	59.4	0.166521
1000	3171	286.922	23.5629	0.0324393	1.32117e+11	1.32117e+11	4.28577e+09	6.80107e-06	24.4838		1500	3171	586.208	37.6071	0.0571584	1.54245e+11	1.54245e+11	8.81642e+09	9.92781e-06	35.7401			1950	3171	989.243	46.3393	0.0859529	1.74161e+11	1.74161e+11	1.49697e+10	1.24523e-05	44.8282		2450	3171	1456.51	53.1171	0.12445	1.9629e+11	1.9629e+11	2.44283e+10	1.48428e-05	53.434		2950	3171	1981.4	59.4686	0.166779
1000	3181	287.504	23.9143	0.0324454	1.32117e+11	1.32117e+11	4.28657e+09	6.80103e-06	24.4837		1500	3181	587.177	38.1686	0.057185	1.54245e+11	1.54245e+11	8.82052e+09	9.92757e-06	35.7393			1950	3181	990.405	46.7314	0.0860246	1.74161e+11	1.74161e+11	1.49822e+10	1.24514e-05	44.825		2450	3181	1457.71	53.1257	0.124605	1.9629e+11	1.9629e+11	2.44588e+10	1.48403e-05	53.4252		2950	3181	1982.82	59.7086	0.167037
1000	3191	288.039	23.8714	0.0324513	1.32117e+11	1.32117e+11	4.28736e+09	6.801e-06	24.4836		1500	3191	588.018	37.6457	0.0572113	1.54245e+11	1.54245e+11	8.82459e+09	9.92733e-06	35.7384			1950	3191	991.383	46.5771	0.0860959	1.74161e+11	1.74161e+11	1.49946e+10	1.24505e-05	44.8218		2450	3191	1459.02	53.1214	0.12476	1.9629e+11	1.9629e+11	2.44892e+10	1.48379e-05	53.4164		2950	3191	1984.24	59.8629	0.167295
1000	3201	288.594	23.4343	0.0324572	1.32117e+11	1.32117e+11	4.28814e+09	6.80097e-06	24.4835		1500	3201	588.961	37.8343	0.0572374	1.54245e+11	1.54245e+11	8.82862e+09	9.92709e-06	35.7375			1950	3201	992.51	47.3143	0.0861669	1.74161e+11	1.74161e+11	1.50069e+10	1.24496e-05	44.8187		2450	3201	1460.27	54.15	0.124915	1.9629e+11	1.9629e+11	2.45195e+10	1.48355e-05	53.4076		2950	3201	1985.65	60.1457	0.167552
1000	3211	289.143	23.0057	0.032463	1.32117e+11	1.32117e+11	4.28891e+09	6.80094e-06	24.4834		1500	3211	589.776	38.0057	0.0572634	1.54245e+11	1.54245e+11	8.83262e+09	9.92686e-06	35.7367			1950	3211	993.591	45.36	0.0862374	1.74161e+11	1.74161e+11	1.50192e+10	1.24488e-05	44.8155		2450	3211	1456.68	55.5107	0.125068	1.9629e+11	1.9629e+11	2.45497e+10	1.4833e-05	53.3989		2950	3211	1987.03	60.0771	0.167808
1000	3221	289.656	23.3571	0.0324688	1.32117e+11	1.32117e+11	4.28966e+09	6.80091e-06	24.4833		1500	3221	590.622	36.2829	0.0572891	1.54245e+11	1.54245e+11	8.83658e+09	9.92663e-06	35.7359			1950	3221	994.763	45.0257	0.0863077	1.74161e+11	1.74161e+11	1.50315e+10	1.24479e-05	44.8124		2450	3221	1457.98	55.0179	0.125222	1.9629e+11	1.9629e+11	2.45798e+10	1.48306e-05	53.3902		2950	3221	1988.42	59.76	0.168064
1000	3231	290.188	23.0914	0.0324744	1.32117e+11	1.32117e+11	4.29041e+09	6.80087e-06	24.4831		1500	3231	591.611	36.3	0.0573146	1.54245e+11	1.54245e+11	8.84052e+09	9.92639e-06	35.735			1950	3231	995.697	46.9114	0.0863775	1.74161e+11	1.74161e+11	1.50436e+10	1.2447e-05	44.8093		2450	3231	1459.3	54.8679	0.125375	1.9629e+11	1.9629e+11	2.46098e+10	1.48282e-05	53.3815		2950	3231	1989.83	59.5629	0.168319
1000	3241	290.764	23.6143	0.03248	1.32117e+11	1.32117e+11	4.29115e+09	6.80084e-06	24.483		1500	3241	592.251	37.7914	0.0573399	1.54245e+11	1.54245e+11	8.84442e+09	9.92617e-06	35.7342			1950	3241	996.636	47.1086	0.0864471	1.74161e+11	1.74161e+11	1.50557e+10	1.24462e-05	44.8062		2450	3241	1460.56	55.1057	0.125527	1.9629e+11	1.9629e+11	2.46398e+10	1.48258e-05	53.3728		2950	3241	1991.21	59.7943	0.168573
1000	3251	291.288	23.7171	0.0324856	1.32117e+11	1.32117e+11	4.29188e+09	6.80081e-06	24.4829		1500	3251	593.196	37.9371	0.057365	1.54245e+11	1.54245e+11	8.8483e+09	9.92594e-06	35.7334			1950	3251	997.983	46.5429	0.0865162	1.74161e+11	1.74161e+11	1.50678e+10	1.24453e-05	44.8031		2450	3251	1461.8	54.2743	0.125679	1.9629e+11	1.9629e+11	2.46696e+10	1.48234e-05	53.3642		2950	3251	1992.6	60.1886	0.168827
1000	3261	291.898	23.7771	0.032491	1.32117e+11	1.32117e+11	4.29261e+09	6.80078e-06	24.4828		1500	3261	594.185	36.12	0.05739	1.54245e+11	1.54245e+11	8.85214e+09	9.92571e-06	35.7326			1950	3261	999.087	46.8857	0.086585	1.74161e+11	1.74161e+11	1.50798e+10	1.24444e-05	44.8		2450	3261	1463.11	55.2257	0.125831	1.9629e+11	1.9629e+11	2.46993e+10	1.4821e-05	53.3556		2950	3261	1994.01	59.8971	0.16908
1000	3271	292.423	23.3743	0.0324964	1.32117e+11	1.32117e+11	4.29332e+09	6.80075e-06	24.4827		1500	3271	595.048	38.9486	0.0574147	1.54245e+11	1.54245e+11	8.85595e+09	9.92549e-06	35.7318			1950	3271	1000.19	46.7914	0.0866535	1.74161e+11	1.74161e+11	1.50917e+10	1.24436e-05	44.797		2450	3271	1464.31	54.6429	0.125982	1.9629e+11	1.9629e+11	2.4729e+10	1.48186e-05	53.3471		2950	3271	1995.44	60.0943	0.169333
1000	3281	292.962	23.6914	0.0325018	1.32117e+11	1.32117e+11	4.29402e+09	6.80072e-06	24.4826		1500	3281	595.825	37.74	0.0574392	1.54245e+11	1.54245e+11	8.85973e+09	9.92527e-06	35.731			1950	3281	1001.17	42.84	0.0867216	1.74161e+11	1.74161e+11	1.51036e+10	1.24428e-05	44.7939		2450	3281	1465.74	54.9857	0.126132	1.9629e+11	1.9629e+11	2.47585e+10	1.48163e-05	53.3385		2950	3281	1996.82	59.8114	0.169585
1000	3291	293.491	22.5	0.032507	1.32117e+11	1.32117e+11	4.29472e+09	6.8007e-06	24.4825		1500	3291	596.795	36.0257	0.0574635	1.54245e+11	1.54245e+11	8.86349e+09	9.92504e-06	35.7302			1950	3291	1002.09	43.1314	0.0867894	1.74161e+11	1.74161e+11	1.51154e+10	1.24419e-05	44.7909		2450	3291	1466.94	54.0857	0.126282	1.9629e+11	1.9629e+11	2.4788e+10	1.48139e-05	53.33		2950	3291	1998.22	59.8457	0.169837
1000	3301	294.052	23.5029	0.0325122	1.32117e+11	1.32117e+11	4.2954e+09	6.80067e-06	24.4824		1500	3301	597.599	36.0257	0.0574876	1.54245e+11	1.54245e+11	8.86721e+09	9.92483e-06	35.7294			1950	3301	1002.98	42.8571	0.0868569	1.74161e+11	1.74161e+11	1.51271e+10	1.24411e-05	44.7879		2450	3301	1468.22	54.24	0.126432	1.9629e+11	1.9629e+11	2.48173e+10	1.48115e-05	53.3216		2950	3301	1999.58	59.6229	0.170088
1000	3311	294.523	23.34	0.0325174	1.32117e+11	1.32117e+11	4.29608e+09	6.80064e-06	24.4823		1500	3311	598.388	35.4943	0.0575116	1.54245e+11	1.54245e+11	8.8709e+09	9.92461e-06	35.7286			1950	3311	1004.12	43.4743	0.086924	1.74161e+11	1.74161e+11	1.51388e+10	1.24403e-05	44.7849		2450	3311	1469.42	50.04	0.126581	1.9629e+11	1.9629e+11	2.48466e+10	1.48092e-05	53.3131		2950	3311	2000.99	60.0343	0.170338
1000	3321	295.165	23.2457	0.0325224	1.32117e+11	1.32117e+11	4.29675e+09	6.80061e-06	24.4822		1500	3321	599.251	33.0429	0.0575353	1.54245e+11	1.54245e+11	8.87456e+09	9.92439e-06	35.7278			1950	3321	1005.19	44.8886	0.0869907	1.74161e+11	1.74161e+11	1.51504e+10	1.24394e-05	44.7819		2450	3321	1470.64	50.64	0.12673	1.9629e+11	1.9629e+11	2.48758e+10	1.48069e-05	53.3047		2950	3321	2002.4	59.9571	0.170588
1000	3331	295.685	22.98	0.0325274	1.32117e+11	1.32117e+11	4.29741e+09	6.80058e-06	24.4821		1500	3331	599.966	33.54	0.0575589	1.54245e+11	1.54245e+11	8.87819e+09	9.92418e-06	35.727			1950	3331	1006.24	45.9257	0.0870572	1.74161e+11	1.74161e+11	1.5162e+10	1.24386e-05	44.779		2450	3331	1471.58	50.8457	0.126878	1.9629e+11	1.9629e+11	2.49049e+10	1.48045e-05	53.2963		2950	3331	2003.82	60.5571	0.170838
1000	3341	296.203	23.4343	0.0325324	1.32117e+11	1.32117e+11	4.29807e+09	6.80056e-06	24.482		1500	3341	600.65	34.0457	0.0575822	1.54245e+11	1.54245e+11	8.8818e+09	9.92397e-06	35.7263			1950	3341	1007.33	45.1029	0.0871233	1.74161e+11	1.74161e+11	1.51735e+10	1.24378e-05	44.776		2450	3341	1472.84	51.6857	0.127026	1.9629e+11	1.9629e+11	2.49339e+10	1.48022e-05	53.288		2950	3341	2003.79	64.6807	0.171086
1000	3351	296.733	22.2771	0.0325373	1.32117e+11	1.32117e+11	4.29871e+09	6.80053e-06	24.4819		1500	3351	601.512	34.1571	0.0576054	1.54245e+11	1.54245e+11	8.88538e+09	9.92376e-06	35.7255			1950	3351	1008.34	44.7943	0.087189	1.74161e+11	1.74161e+11	1.5185e+10	1.2437e-05	44.7731		2450	3351	1474.15	51.6107	0.127173	1.9629e+11	1.9629e+11	2.49628e+10	1.47999e-05	53.2796		2950	3351	2006.33	94.7429	0.171335
1000	3361	297.257	22.6886	0.0325421	1.32117e+11	1.32117e+11	4.29935e+09	6.8005e-06	24.4818		1500	3361	602.36	35.2286	0.0576284	1.54245e+11	1.54245e+11	8.88892e+09	9.92355e-06	35.7248			1950	3361	1009.38	45.2571	0.0872545	1.74161e+11	1.74161e+11	1.51964e+10	1.24362e-05	44.7702		2450	3361	1475.45	55.2857	0.12732	1.9629e+11	1.9629e+11	2.49916e+10	1.47976e-05	53.2713		2950	3361	2008.51	85.5	0.171582
1000	3371	297.764	22.98	0.0325469	1.32117e+11	1.32117e+11	4.29998e+09	6.80048e-06	24.4817		1500	3371	603.236	36.8829	0.0576512	1.54245e+11	1.54245e+11	8.89244e+09	9.92334e-06	35.724			1950	3371	1010.42	44.6829	0.0873196	1.74161e+11	1.74161e+11	1.52077e+10	1.24354e-05	44.7673		2450	3371	1475.41	84.2357	0.127466	1.9629e+11	1.9629e+11	2.50204e+10	1.47953e-05	53.263		2950	3371	2010.42	91.1657	0.171829
1000	3381	298.332	23.0464	0.0325516	1.32117e+11	1.32117e+11	4.3006e+09	6.80045e-06	24.4816		1500	3381	604.076	36.48	0.0576739	1.54245e+11	1.54245e+11	8.89593e+09	9.92314e-06	35.7233			1950	3381	1011.52	45.4543	0.0873844	1.74161e+11	1.74161e+11	1.5219e+10	1.24346e-05	44.7644		2450	3381	1477.55	85.0571	0.127612	1.9629e+11	1.9629e+11	2.5049e+10	1.4793e-05	53.2548		2950	3381	2012.31	87.1886	0.172076
1000	3391	298.884	24.6643	0.0325562	1.32117e+11	1.32117e+11	4.30122e+09	6.80043e-06	24.4815		1500	3391	604.953	36.5314	0.0576963	1.54245e+11	1.54245e+11	8.8994e+09	9.92293e-06	35.7226			1950	3391	1012.54	45.6536	0.0874489	1.74161e+11	1.74161e+11	1.52302e+10	1.24338e-05	44.7615		2450	3391	1479.34	82.275	0.127758	1.9629e+11	1.9629e+11	2.50776e+10	1.47907e-05	53.2466		2950	3391	2014.43	85.56	0.172322
1000	3401	297.445	24.6964	0.0325608	1.32117e+11	1.32117e+11	4.30182e+09	6.8004e-06	24.4814		1500	3401	605.768	35.7686	0.0577186	1.54245e+11	1.54245e+11	8.90283e+09	9.92273e-06	35.7218			1950	3401	1013.64	46.0429	0.087513	1.74161e+11	1.74161e+11	1.52414e+10	1.2433e-05	44.7587		2450	3401	1481.36	80.0571	0.127903	1.9629e+11	1.9629e+11	2.51061e+10	1.47884e-05	53.2384		2950	3401	2016.5	86.16	0.172567
1000	3411	298.12	26.175	0.0325653	1.32117e+11	1.32117e+11	4.30242e+09	6.80038e-06	24.4814		1500	3411	606.622	36.0086	0.0577407	1.54245e+11	1.54245e+11	8.90624e+09	9.92253e-06	35.7211			1950	3411	1013.59	71.9143	0.0875768	1.74161e+11	1.74161e+11	1.52525e+10	1.24322e-05	44.7559		2450	3411	1483.09	75.1629	0.128047	1.9629e+11	1.9629e+11	2.51345e+10	1.47862e-05	53.2302		2950	3411	2018.49	87.2143	0.172812
1000	3421	298.63	26.9679	0.0325698	1.32117e+11	1.32117e+11	4.30301e+09	6.80035e-06	24.4813		1500	3421	607.409	35.82	0.0577626	1.54245e+11	1.54245e+11	8.90963e+09	9.92233e-06	35.7204			1950	3421	1015.36	67.8429	0.0876404	1.74161e+11	1.74161e+11	1.52636e+10	1.24314e-05	44.753		2450	3421	1484.75	75.4629	0.128191	1.9629e+11	1.9629e+11	2.51628e+10	1.47839e-05	53.2221		2950	3421	2020.48	86.6314	0.173057
1000	3431	299.336	25.7229	0.0325742	1.32117e+11	1.32117e+11	4.3036e+09	6.80033e-06	24.4812		1500	3431	608.277	36.0429	0.0577844	1.54245e+11	1.54245e+11	8.91298e+09	9.92214e-06	35.7197			1950	3431	1016.94	67.2107	0.0877036	1.74161e+11	1.74161e+11	1.52746e+10	1.24306e-05	44.7502		2450	3431	1486.32	73.5771	0.128335	1.9629e+11	1.9629e+11	2.5191e+10	1.47817e-05	53.214		2950	3431	2022.49	85.9886	0.173301
1000	3441	299.962	25.98	0.0325786	1.32117e+11	1.32117e+11	4.30417e+09	6.8003e-06	24.4811		1500	3441	609.132	35.8571	0.057806	1.54245e+11	1.54245e+11	8.91631e+09	9.92194e-06	35.719			1950	3441	1018.34	66.5486	0.0877664	1.74161e+11	1.74161e+11	1.52855e+10	1.24298e-05	44.7474		2450	3441	1488.14	73.5771	0.128479	1.9629e+11	1.9629e+11	2.52191e+10	1.47794e-05	53.2059		2950	3441	2024.53	86.3314	0.173544
1000	3451	300.446	25.7229	0.0325829	1.32117e+11	1.32117e+11	4.30474e+09	6.80028e-06	24.481		1500	3451	609.104	62.2071	0.0578274	1.54245e+11	1.54245e+11	8.91961e+09	9.92175e-06	35.7183			1950	3451	1019.86	63.1886	0.087829	1.74161e+11	1.74161e+11	1.52964e+10	1.24291e-05	44.7446		2450	3451	1489.95	73.9543	0.128621	1.9629e+11	1.9629e+11	2.52472e+10	1.47772e-05	53.1978		2950	3451	2026.53	86.8286	0.173787
1000	3461	301.151	26.0743	0.0325872	1.32117e+11	1.32117e+11	4.30531e+09	6.80026e-06	24.4809		1500	3461	610.655	59.4857	0.0578486	1.54245e+11	1.54245e+11	8.92289e+09	9.92155e-06	35.7176			1950	3461	1021.35	62.1771	0.0878913	1.74161e+11	1.74161e+11	1.53073e+10	1.24283e-05	44.7419		2450	3461	1491.67	75.0514	0.128764	1.9629e+11	1.9629e+11	2.52751e+10	1.47749e-05	53.1898		2950	3461	2028.56	86.6229	0.174029
1000	3471	301.631	25.8857	0.0325914	1.32117e+11	1.32117e+11	4.30586e+09	6.80023e-06	24.4808		1500	3471	612.007	50.7857	0.0578697	1.54245e+11	1.54245e+11	8.92614e+09	9.92136e-06	35.7169			1950	3471	1022.74	61.3029	0.0879533	1.74161e+11	1.74161e+11	1.53181e+10	1.24275e-05	44.7391		2450	3471	1493.38	74.5029	0.128906	1.9629e+11	1.9629e+11	2.5303e+10	1.47727e-05	53.1818		2950	3471	2030.61	85.9371	0.174271
1000	3481	302.378	27.6	0.0325956	1.32117e+11	1.32117e+11	4.30641e+09	6.80021e-06	24.4808		1500	3481	613.268	54.4371	0.0578906	1.54245e+11	1.54245e+11	8.92936e+09	9.92117e-06	35.7162			1950	3481	1024.2	60.8229	0.0880149	1.74161e+11	1.74161e+11	1.53288e+10	1.24268e-05	44.7364		2450	3481	1495.07	74.28	0.129048	1.9629e+11	1.9629e+11	2.53308e+10	1.47705e-05	53.1738		2950	3481	2032.59	85.6029	0.174512
1000	3491	302.394		0.0325997	1.32117e+11	1.32117e+11	4.30696e+09	6.80019e-06	24.4807		1500	3491	614.21	50.3829	0.0579113	1.54245e+11	1.54245e+11	8.93256e+09	9.92099e-06	35.7156			1950	3491	1025.49	60.9429	0.0880763	1.74161e+11	1.74161e+11	1.53395e+10	1.2426e-05	44.7336		2450	3491	1496.84	74.46	0.129189	1.9629e+11	1.9629e+11	2.53585e+10	1.47683e-05	53.1659		2950	3491	2034.56	85.5257	0.174752
1000	3501	303.544		0.0326037	1.32117e+11	1.32117e+11	4.30749e+09	6.80017e-06	24.4806		1500	3501	615.455	50.9314	0.0579319	1.54245e+11	1.54245e+11	8.93574e+09	9.9208e-06	35.7149			1950	3501	1026.96	61.8686	0.0881373	1.74161e+11	1.74161e+11	1.53501e+10	1.24253e-05	44.7309		2450	3501	1498.61	74.7514	0.12933	1.9629e+11	1.9629e+11	2.53861e+10	1.47661e-05	53.158		2950	3501	2036.52	85.0971	0.174993
1000	3511	304.628		0.0326077	1.32117e+11	1.32117e+11	4.30802e+09	6.80015e-06	24.4805		1500	3511	616.533	50.3486	0.0579523	1.54245e+11	1.54245e+11	8.93889e+09	9.92062e-06	35.7142			1950	3511	1028.46	61.4914	0.0881981	1.74161e+11	1.74161e+11	1.53607e+10	1.24245e-05	44.7282		2450	3511	1500.36	75.2057	0.12947	1.9629e+11	1.9629e+11	2.54137e+10	1.47639e-05	53.1501		2950	3511	2038.54	85.1486	0.175232
1000	3521	305.566									1500	3521	617.949	52.2257									1950	3521	1029.95	62.6057								2450	3521	1502.1	74.9486								2950	3521	2040.53	84.9257
1000	3531	306.536									1500	3531	619.142	50.9229									1950	3531	1031.37	62.2457								2450	3531	1503.85	74.6143								2950	3531	2042.53	85.2
1000	3541	307.384									1500	3541	620.303	50.4771									1950	3541	1032.79	62.1086								2450	3541	1505.58	74.3486								2950	3541	2044.47	84.3429
1000	3551	308.377									1500	3551	621.396	48.4457									1950	3551	1034.22	61.8								2450	3551	1507.32	73.9971								2950	3551	2036.85	83.7
1000	3561	309.171									1500	3561	622.422	48.6771									1950	3561	1035.71	62.5457								2450	3561	1509.03	73.6457								2950	3561	2038.79	82.6714
1000	3571	310.053									1500	3571	623.601	48.8486									1950	3571	1037.16	62.4857								2450	3571	1510.73	73.2257								0	3571	2040.72	82.5321
1000	3581	310.949									1500	3581	624.821	49.4314									1950	3581	1038.67	62.7771								2450	3581	1512.44	73.0286								0	3581	2042.62	81.2914
1000	3591	311.799									1500	3591	626.002	50.3829									1950	3591	1040.08	62.6486								2450	3591	1514.12	72.9107								2950	3591	2044.55	83.04
[truncated: 55 more columns]

## Sheet: Flux data AaV 2
TMP (Pa)	Time (s)	weight	J measured (LMH)	ω (kg/m2)	α (eq)	α	Rc model (1/m)	Jmodel (m/s)	Jmodel (LMH)		TMP (Pa)	Time (s)	weight	J measured (LMH)	ω (kg/m2)	α (eq)	α	Rc model (1/m)	Jmodel (m/s)	Jmodel (LMH)		TMP (Pa)	Time (s)	weight	J measured (LMH)	ω (kg/m2)	α (eq)	α	Rc model (1/m)	Jmodel (m/s)	Jmodel (LMH)		TMP (Pa)	Time (s)	weight	J measured (LMH)	ω (kg/m2)	α (eq)	α	Rc model (1/m)	Jmodel (m/s)	Jmodel (LMH)		TMP (Pa)	Time (s)	weight	J measured (LMH)	ω (kg/m2)	α (eq)
1000	1	101.233	29.5714	0	1.56374e+11	1.56374e+11	0	7.44879e-06	26.8156		1500	1	315.011	44.8714	0	1.81957e+11	1.81957e+11	0	1.11732e-05	40.2235		1950	1	627.691	68.2714	0	2.04982e+11	2.04982e+11	0	1.45251e-05	52.2905		2450	1	1020.8	79.5	0	2.30565e+11	2.30565e+11	0	1.82495e-05	65.6983		2950	1	1487.21	81.9857	0	2.56148e+11
1000	11	102.067	35.7429	0.000578771	1.56374e+11	1.56374e+11	9.05048e+07	7.4443e-06	26.7995		1500	11	316.053	44.6571	0.000868156	1.81957e+11	1.81957e+11	1.57967e+08	1.11614e-05	40.1811		1950	11	628.846	49.5	0.0011286	2.04982e+11	2.04982e+11	2.31343e+08	1.45028e-05	52.21		2450	11	1022.13	57.1286	0.00141799	2.30565e+11	2.30565e+11	3.26938e+08	1.82098e-05	65.5554		2950	11	1488.94	73.8857	0.00170737	2.56148e+11
1000	21	102.656	25.2429	0.00114274	1.56374e+11	1.56374e+11	1.78696e+08	7.43993e-06	26.7837		1500	21	317.003	40.7143	0.00171379	1.81957e+11	1.81957e+11	3.11836e+08	1.115e-05	40.14		1950	21	629.887	44.6143	0.00222745	2.04982e+11	2.04982e+11	4.56586e+08	1.44811e-05	52.1318		2450	21	1023.49	58.3286	0.00279779	2.30565e+11	2.30565e+11	6.45071e+08	1.81714e-05	65.417		2950	21	1490.53	68.0571	0.00336764	2.56148e+11
1000	31	103.247	25.3286	0.00169246	1.56374e+11	1.56374e+11	2.64657e+08	7.43567e-06	26.7684		1500	31	317.891	38.0571	0.00253784	1.81957e+11	1.81957e+11	4.61778e+08	1.11389e-05	40.1		1950	31	630.893	43.1143	0.00329792	2.04982e+11	2.04982e+11	6.76014e+08	1.446e-05	52.0559		2450	31	1024.82	56.9571	0.00414138	2.30565e+11	2.30565e+11	9.54857e+08	1.81341e-05	65.2828		2950	31	1492.39	79.8	0.00498347	2.56148e+11
1000	41	103.874	26.8714	0.00222842	1.56374e+11	1.56374e+11	3.48468e+08	7.43153e-06	26.7535		1500	41	318.702	34.7571	0.0033412	1.81957e+11	1.81957e+11	6.07955e+08	1.11281e-05	40.0611		1950	41	632.061	50.0571	0.00434132	2.04982e+11	2.04982e+11	8.89892e+08	1.44395e-05	51.9821		2450	41	1026.16	57.2571	0.0054506	2.30565e+11	2.30565e+11	1.25672e+09	1.80979e-05	65.1525		2950	41	1494.03	70.1571	0.00655734	2.56148e+11
1000	51	104.484	26.1429	0.00275112	1.56374e+11	1.56374e+11	4.30205e+08	7.42749e-06	26.739		1500	51	319.541	35.9571	0.00412469	1.81957e+11	1.81957e+11	7.50517e+08	1.11176e-05	40.0232		1950	51	633.192	48.4714	0.00535886	2.04982e+11	2.04982e+11	1.09847e+09	1.44195e-05	51.9104		2450	51	1027.64	63.3429	0.00672714	2.30565e+11	2.30565e+11	1.55104e+09	1.80628e-05	65.0259		2950	51	1495.53	64.6714	0.00809149	2.56148e+11
1000	61	105.014	22.7143	0.00326103	1.56374e+11	1.56374e+11	5.0994e+08	7.42355e-06	26.7248		1500	61	320.346	34.5	0.00488911	1.81957e+11	1.81957e+11	8.89609e+08	1.11073e-05	39.9863		1950	61	634.201	43.2429	0.00635166	2.04982e+11	2.04982e+11	1.30197e+09	1.44001e-05	51.8405		2450	61	1029.14	64.3714	0.00797257	2.30565e+11	2.30565e+11	1.83819e+09	1.80286e-05	64.903		2950	61	1497.35	77.8714	0.00958801	2.56148e+11
1000	71	105.541	22.5857	0.00375857	1.56374e+11	1.56374e+11	5.87743e+08	7.41972e-06	26.711		1500	71	321.173	35.4429	0.0056352	1.81957e+11	1.81957e+11	1.02536e+09	1.10973e-05	39.9504		1950	71	635.349	49.2	0.00732077	2.04982e+11	2.04982e+11	1.50063e+09	1.43813e-05	51.7726		2450	71	1030.64	64.2429	0.00918835	2.30565e+11	2.30565e+11	2.11851e+09	1.79954e-05	64.7834		2950	71	1499.14	76.5429	0.0110488	2.56148e+11
1000	81	106.095	23.7429	0.00424416	1.56374e+11	1.56374e+11	6.63677e+08	7.41598e-06	26.6975		1500	81	322.055	37.8	0.00636364	1.81957e+11	1.81957e+11	1.15791e+09	1.10876e-05	39.9153		1950	81	636.596	53.4429	0.0082672	2.04982e+11	2.04982e+11	1.69462e+09	1.43629e-05	51.7064		2450	81	1032.19	66.4714	0.0103758	2.30565e+11	2.30565e+11	2.3923e+09	1.7963e-05	64.667		2950	81	1500.96	77.9571	0.0124756	2.56148e+11
1000	91	106.636	23.1857	0.00471821	1.56374e+11	1.56374e+11	7.37806e+08	7.41233e-06	26.6844		1500	91	322.925	37.2857	0.00707511	1.81957e+11	1.81957e+11	1.28737e+09	1.10781e-05	39.8812		1950	91	637.812	52.1143	0.00919186	2.04982e+11	2.04982e+11	1.88416e+09	1.4345e-05	51.6418		2450	91	1033.72	65.5286	0.0115363	2.30565e+11	2.30565e+11	2.65986e+09	1.79316e-05	64.5536		2950	91	1502.69	74.4857	0.0138702	2.56148e+11
1000	101	107.079	18.9857	0.00518109	1.56374e+11	1.56374e+11	8.10189e+08	7.40877e-06	26.6716		1500	101	323.773	36.3429	0.00777022	1.81957e+11	1.81957e+11	1.41385e+09	1.10689e-05	39.8479		1950	101	639.059	53.4429	0.0100956	2.04982e+11	2.04982e+11	2.06942e+09	1.43275e-05	51.5789		2450	101	1035.2	63.3429	0.0126709	2.30565e+11	2.30565e+11	2.92146e+09	1.79009e-05	64.4432		2950	101	1504.39	72.7714	0.0152339	2.56148e+11
1000	111	107.664	25.0714	0.00563317	1.56374e+11	1.56374e+11	8.80882e+08	7.4053e-06	26.6591		1500	111	324.612	35.9571	0.00844956	1.81957e+11	1.81957e+11	1.53746e+09	1.10598e-05	39.8154		1950	111	640.27	51.9	0.0109793	2.04982e+11	2.04982e+11	2.25056e+09	1.43104e-05	51.5175		2450	111	1036.76	67.1143	0.0137807	2.30565e+11	2.30565e+11	3.17735e+09	1.7871e-05	64.3355		2950	111	1506.16	75.9	0.0165682	2.56148e+11
1000	121	108.234	24.4286	0.00607479	1.56374e+11	1.56374e+11	9.4994e+08	7.40191e-06	26.6469		1500	121	325.514	38.6571	0.0091137	1.81957e+11	1.81957e+11	1.6583e+09	1.1051e-05	39.7836		1950	121	641.509	53.1	0.0118437	2.04982e+11	2.04982e+11	2.42775e+09	1.42938e-05	51.4577		2450	121	1038.24	63.4286	0.0148669	2.30565e+11	2.30565e+11	3.42777e+09	1.78418e-05	64.2305		2950	121	1507.94	75.9429	0.0178745	2.56148e+11
1000	131	108.813	24.8143	0.00650628	1.56374e+11	1.56374e+11	1.01741e+09	7.39861e-06	26.635		1500	131	326.392	37.6286	0.00976317	1.81957e+11	1.81957e+11	1.77648e+09	1.10424e-05	39.7527		1950	131	642.733	52.4571	0.0126896	2.04982e+11	2.04982e+11	2.60113e+09	1.42776e-05	51.3992		2450	131	1039.73	63.9429	0.0159302	2.30565e+11	2.30565e+11	3.67295e+09	1.78134e-05	64.1281		2950	131	1509.78	79.1571	0.0191539	2.56148e+11
1000	141	109.39	24.7286	0.00692796	1.56374e+11	1.56374e+11	1.08335e+09	7.39538e-06	26.6234		1500	141	327.339	40.5857	0.0103985	1.81957e+11	1.81957e+11	1.89207e+09	1.1034e-05	39.7224		1950	141	644.007	54.6	0.0135175	2.04982e+11	2.04982e+11	2.77084e+09	1.42617e-05	51.3421		2450	141	1041.21	63.2571	0.0169718	2.30565e+11	2.30565e+11	3.9131e+09	1.77856e-05	64.028		2950	141	1511.64	79.4571	0.0204077	2.56148e+11
1000	151	110.253	36.9857	0.00734014	1.56374e+11	1.56374e+11	1.14781e+09	7.39222e-06	26.612		1500	151	328.3	41.1857	0.0110201	1.81957e+11	1.81957e+11	2.00518e+09	1.10258e-05	39.6929		1950	151	645.229	52.3714	0.0143282	2.04982e+11	2.04982e+11	2.93703e+09	1.42462e-05	51.2863		2450	151	1042.68	62.8286	0.0179924	2.30565e+11	2.30565e+11	4.1484e+09	1.77584e-05	63.9303		2950	151	1513.45	77.8286	0.0216368	2.56148e+11
1000	161	110.943	29.5714	0.00774309	1.56374e+11	1.56374e+11	1.21082e+09	7.38914e-06	26.6009		1500	161	329.223	39.5571	0.0116284	1.81957e+11	1.81957e+11	2.11587e+09	1.10178e-05	39.664		1950	161	646.399	50.1429	0.0151223	2.04982e+11	2.04982e+11	3.0998e+09	1.4231e-05	51.2318		2450	161	1044.24	67.1143	0.0189928	2.30565e+11	2.30565e+11	4.37906e+09	1.77319e-05	63.8347		2950	161	1515.28	78.1286	0.0228423	2.56148e+11
1000	171	111.55	26.0143	0.00813711	1.56374e+11	1.56374e+11	1.27243e+09	7.38613e-06	26.5901		1500	171	330.166	40.4143	0.012224	1.81957e+11	1.81957e+11	2.22424e+09	1.10099e-05	39.6357		1950	171	647.614	52.0714	0.0159004	2.04982e+11	2.04982e+11	3.25929e+09	1.42162e-05	51.1785		2450	171	1045.82	67.5429	0.0199737	2.30565e+11	2.30565e+11	4.60524e+09	1.77059e-05	63.7414		2950	171	1517.1	78.3	0.0240252	2.56148e+11
1000	181	112.157	26.0143	0.00852245	1.56374e+11	1.56374e+11	1.33269e+09	7.38319e-06	26.5795		1500	181	331.13	41.3143	0.0128071	1.81957e+11	1.81957e+11	2.33035e+09	1.10023e-05	39.6081		1950	181	648.751	48.7286	0.016663	2.04982e+11	2.04982e+11	3.41561e+09	1.42018e-05	51.1263		2450	181	1047.4	67.9286	0.020936	2.30565e+11	2.30565e+11	4.82711e+09	1.76806e-05	63.65		2950	181	1518.94	78.8143	0.0251863	2.56148e+11
1000	191	112.817	28.2857	0.00889937	1.56374e+11	1.56374e+11	1.39163e+09	7.38032e-06	26.5691		1500	191	332.065	40.0714	0.0133783	1.81957e+11	1.81957e+11	2.43428e+09	1.09948e-05	39.5811		1950	191	649.95	51.3857	0.0174107	2.04982e+11	2.04982e+11	3.56887e+09	1.41876e-05	51.0753		2450	191	1048.91	64.6286	0.0218803	2.30565e+11	2.30565e+11	5.04482e+09	1.76557e-05	63.5606		2950	191	1520.83	81	0.0263264	2.56148e+11
1000	201	113.431	26.3143	0.00926811	1.56374e+11	1.56374e+11	1.44929e+09	7.37751e-06	26.559		1500	201	333.073	43.2	0.0139379	1.81957e+11	1.81957e+11	2.5361e+09	1.09874e-05	39.5547		1950	201	651.156	51.6857	0.0181439	2.04982e+11	2.04982e+11	3.71916e+09	1.41737e-05	51.0254		2450	201	1050.42	64.7571	0.0228072	2.30565e+11	2.30565e+11	5.25852e+09	1.76314e-05	63.4732		2950	201	1522.65	77.8286	0.0274464	2.56148e+11
1000	211	114.024	25.4143	0.00962892	1.56374e+11	1.56374e+11	1.50571e+09	7.37476e-06	26.5491		1500	211	334.009	40.1143	0.0144862	1.81957e+11	1.81957e+11	2.63586e+09	1.09802e-05	39.5288		1950	211	652.414	53.9143	0.0188631	2.04982e+11	2.04982e+11	3.86659e+09	1.41601e-05	50.9765		2450	211	1052.01	68.1857	0.0237173	2.30565e+11	2.30565e+11	5.46836e+09	1.76076e-05	63.3875		2950	211	1524.48	78.4714	0.028547	2.56148e+11
1000	221	114.526	21.5143	0.00998201	1.56374e+11	1.56374e+11	1.56093e+09	7.37207e-06	26.5395		1500	221	334.912	38.7	0.0150235	1.81957e+11	1.81957e+11	2.73364e+09	1.09732e-05	39.5035		1950	221	653.691	54.7286	0.0195688	2.04982e+11	2.04982e+11	4.01124e+09	1.41468e-05	50.9286		2450	221	1053.6	68.0571	0.0246112	2.30565e+11	2.30565e+11	5.67446e+09	1.75843e-05	63.3036		2950	221	1526.34	79.9714	0.0296288	2.56148e+11
1000	231	115.034	21.7714	0.0103276	1.56374e+11	1.56374e+11	1.61497e+09	7.36945e-06	26.53		1500	231	335.901	42.3857	0.0155503	1.81957e+11	1.81957e+11	2.82949e+09	1.09663e-05	39.4788		1950	231	654.924	52.8429	0.0202613	2.04982e+11	2.04982e+11	4.15321e+09	1.41338e-05	50.8817		2450	231	1055.15	66.4714	0.0254894	2.30565e+11	2.30565e+11	5.87696e+09	1.75615e-05	63.2213		2950	231	1521.63	-67.4143	0.0306926	2.56148e+11
1000	241	115.496	19.8	0.0106659	1.56374e+11	1.56374e+11	1.66787e+09	7.36688e-06	26.5208		1500	241	336.748	36.3	0.0160668	1.81957e+11	1.81957e+11	2.92347e+09	1.09596e-05	39.4545		1950	241	656.181	53.8714	0.0209412	2.04982e+11	2.04982e+11	4.29257e+09	1.4121e-05	50.8357		2450	241	1056.71	66.7286	0.0263525	2.30565e+11	2.30565e+11	6.07596e+09	1.75391e-05	63.1407		2950	241	1523.28	70.9286	0.031739	2.56148e+11
1000	251	116.163	28.5857	0.0109971	1.56374e+11	1.56374e+11	1.71967e+09	7.36436e-06	26.5117		1500	251	337.677	39.8143	0.0165733	1.81957e+11	1.81957e+11	3.01564e+09	1.0953e-05	39.4307		1950	251	657.408	52.5857	0.0216088	2.04982e+11	2.04982e+11	4.42942e+09	1.41085e-05	50.7907		2450	251	1058.25	65.9571	0.027201	2.30565e+11	2.30565e+11	6.27159e+09	1.75171e-05	63.0617		2950	251	1524.9	69.2571	0.0327686	2.56148e+11
1000	261	116.78	26.4429	0.0113215	1.56374e+11	1.56374e+11	1.77039e+09	7.3619e-06	26.5028		1500	261	338.551	37.4571	0.0170702	1.81957e+11	1.81957e+11	3.10604e+09	1.09465e-05	39.4075		1950	261	658.633	52.5	0.0222645	2.04982e+11	2.04982e+11	4.56382e+09	1.40963e-05	50.7465		2450	261	1059.8	66.5143	0.0280353	2.30565e+11	2.30565e+11	6.46394e+09	1.74956e-05	62.9842		2950	261	1526.6	72.8571	0.0337819	2.56148e+11
1000	271	117.399	26.5286	0.0116391	1.56374e+11	1.56374e+11	1.82005e+09	7.35949e-06	26.4942		1500	271	339.506	40.9286	0.0175576	1.81957e+11	1.81957e+11	3.19473e+09	1.09402e-05	39.3846		1950	271	659.893	54	0.0229086	2.04982e+11	2.04982e+11	4.69585e+09	1.40842e-05	50.7032		2450	271	1055.62	-59.7429	0.0288558	2.30565e+11	2.30565e+11	6.65313e+09	1.74745e-05	62.9081		2950	271	1528.18	67.7571	0.0347795	2.56148e+11
1000	281	118.033	27.1714	0.0119502	1.56374e+11	1.56374e+11	1.8687e+09	7.35713e-06	26.4857		1500	281	340.412	38.8286	0.0180359	1.81957e+11	1.81957e+11	3.28175e+09	1.0934e-05	39.3623		1950	281	661.164	54.4714	0.0235415	2.04982e+11	2.04982e+11	4.82557e+09	1.40724e-05	50.6607		2450	281	1056.99	58.8429	0.0296631	2.30565e+11	2.30565e+11	6.83926e+09	1.74537e-05	62.8334		2950	281	1529.8	69.4286	0.0357619	2.56148e+11
1000	291	118.73	29.8714	0.0122549	1.56374e+11	1.56374e+11	1.91636e+09	7.35483e-06	26.4774		1500	291	341.309	38.4429	0.0185052	1.81957e+11	1.81957e+11	3.36716e+09	1.09279e-05	39.3404		1950	291	662.415	53.6143	0.0241634	2.04982e+11	2.04982e+11	4.95307e+09	1.40608e-05	50.619		2450	291	1058.28	55.0714	0.0304574	2.30565e+11	2.30565e+11	7.02241e+09	1.74334e-05	62.7601		2950	291	1531.6	77.1857	0.0367295	2.56148e+11
1000	301	119.357	26.8714	0.0125535	1.56374e+11	1.56374e+11	1.96304e+09	7.35257e-06	26.4692		1500	301	342.283	41.7429	0.018966	1.81957e+11	1.81957e+11	3.45099e+09	1.09219e-05	39.3189		1950	301	663.691	54.6857	0.0247748	2.04982e+11	2.04982e+11	5.07839e+09	1.40495e-05	50.5781		2450	301	1059.65	58.9286	0.0312392	2.30565e+11	2.30565e+11	7.20267e+09	1.74134e-05	62.6882		2950	301	1533.23	69.8143	0.0376829	2.56148e+11
1000	311	120.024	28.5857	0.012846	1.56374e+11	1.56374e+11	2.00879e+09	7.35035e-06	26.4613		1500	311	343.269	42.2571	0.0194183	1.81957e+11	1.81957e+11	3.53329e+09	1.09161e-05	39.2978		1950	311	664.946	53.7857	0.0253759	2.04982e+11	2.04982e+11	5.2016e+09	1.40383e-05	50.538		2450	311	1061.16	64.7143	0.0320089	2.30565e+11	2.30565e+11	7.38013e+09	1.73937e-05	62.6175		2950	311	1534.87	70.5857	0.0386224	2.56148e+11
1000	321	120.681	28.1571	0.0131327	1.56374e+11	1.56374e+11	2.05362e+09	7.34819e-06	26.4535		1500	321	344.243	41.7429	0.0198624	1.81957e+11	1.81957e+11	3.6141e+09	1.09103e-05	39.2771		1950	321	666.239	55.4143	0.025967	2.04982e+11	2.04982e+11	5.32276e+09	1.40274e-05	50.4986		2450	321	1062.51	57.7714	0.0327668	2.30565e+11	2.30565e+11	7.55487e+09	1.73745e-05	62.548		2950	321	1536.29	60.5143	0.0395486	2.56148e+11
1000	331	121.307	26.8286	0.0134136	1.56374e+11	1.56374e+11	2.09755e+09	7.34606e-06	26.4458		1500	331	345.211	41.4857	0.0202985	1.81957e+11	1.81957e+11	3.69346e+09	1.09047e-05	39.2568		1950	331	663.602	-37.6714	0.0265483	2.04982e+11	2.04982e+11	5.44192e+09	1.40166e-05	50.4598		2450	331	1063.81	55.8	0.0335133	2.30565e+11	2.30565e+11	7.72698e+09	1.73555e-05	62.4798		2950	331	1537.96	71.7857	0.0404617	2.56148e+11
1000	341	121.925	26.4857	0.013689	1.56374e+11	1.56374e+11	2.14061e+09	7.34399e-06	26.4383		1500	341	346.184	41.7	0.0207269	1.81957e+11	1.81957e+11	3.7714e+09	1.08992e-05	39.2369		1950	341	664.718	47.8286	0.0271202	2.04982e+11	2.04982e+11	5.55915e+09	1.40061e-05	50.4218		2450	341	1065.07	54.0857	0.0342486	2.30565e+11	2.30565e+11	7.89651e+09	1.73369e-05	62.4127		2950	341	1539.69	74.0571	0.0413622	2.56148e+11
1000	351	122.476	23.6143	0.0139589	1.56374e+11	1.56374e+11	2.18282e+09	7.34195e-06	26.431		1500	351	347.138	40.8857	0.0211477	1.81957e+11	1.81957e+11	3.84797e+09	1.08937e-05	39.2174		1950	351	665.793	46.0714	0.0276828	2.04982e+11	2.04982e+11	5.67448e+09	1.39957e-05	50.3845		2450	351	1066.81	74.4	0.034973	2.30565e+11	2.30565e+11	8.06355e+09	1.73185e-05	62.3467		2950	351	1541.41	73.8857	0.0422504	2.56148e+11
1000	361	123.133	28.1571	0.0142236	1.56374e+11	1.56374e+11	2.2242e+09	7.33995e-06	26.4238		1500	361	348.041	38.7	0.0215611	1.81957e+11	1.81957e+11	3.9232e+09	1.08884e-05	39.1982		1950	361	666.945	49.3714	0.0282365	2.04982e+11	2.04982e+11	5.78797e+09	1.39855e-05	50.3478		2450	361	1068.17	58.5	0.035687	2.30565e+11	2.30565e+11	8.22816e+09	1.73005e-05	62.2819		2950	361	1543.12	73.2857	0.0431267	2.56148e+11
1000	371	123.766	27.1286	0.014483	1.56374e+11	1.56374e+11	2.26478e+09	7.338e-06	26.4168		1500	371	349.01	41.5286	0.0219674	1.81957e+11	1.81957e+11	3.99712e+09	1.08832e-05	39.1794		1950	371	668.008	45.5571	0.0287815	2.04982e+11	2.04982e+11	5.89968e+09	1.39755e-05	50.3117		2450	371	1069.58	60.0429	0.0363907	2.30565e+11	2.30565e+11	8.39041e+09	1.72828e-05	62.2181		2950	371	1544.8	72	0.0439914	2.56148e+11
1000	381	124.403	27.3	0.0147375	1.56374e+11	1.56374e+11	2.30456e+09	7.33608e-06	26.4099		1500	381	349.974	41.3143	0.0223666	1.81957e+11	1.81957e+11	4.06976e+09	1.0878e-05	39.161		1950	381	669.136	48.3429	0.0293179	2.04982e+11	2.04982e+11	6.00963e+09	1.39656e-05	50.2762		2450	381	1070.78	51.4714	0.0370844	2.30565e+11	2.30565e+11	8.55036e+09	1.72654e-05	62.1553		2950	381	1546.44	69.9429	0.0448448	2.56148e+11
1000	391	124.983	24.8571	0.014987	1.56374e+11	1.56374e+11	2.34358e+09	7.3342e-06	26.4031		1500	391	350.931	41.0143	0.022759	1.81957e+11	1.81957e+11	4.14116e+09	1.0873e-05	39.1428		1950	391	670.261	48.2143	0.029846	2.04982e+11	2.04982e+11	6.11789e+09	1.39559e-05	50.2414		2450	391	1072.1	56.7857	0.0377685	2.30565e+11	2.30565e+11	8.70808e+09	1.72482e-05	62.0936		2950	391	1548.14	72.9857	0.0456872	2.56148e+11
1000	401	125.585	25.8	0.0152317	1.56374e+11	1.56374e+11	2.38184e+09	7.33236e-06	26.3965		1500	401	351.897	41.4	0.0231447	1.81957e+11	1.81957e+11	4.21135e+09	1.08681e-05	39.125		1950	401	671.316	45.2143	0.0303661	2.04982e+11	2.04982e+11	6.22449e+09	1.39464e-05	50.2071		2450	401	1073.51	60.3	0.038443	2.30565e+11	2.30565e+11	8.86361e+09	1.72313e-05	62.0328		2950	401	1549.88	74.7	0.046519	2.56148e+11
1000	411	126.236	27.9	0.0154717	1.56374e+11	1.56374e+11	2.41938e+09	7.33055e-06	26.39		1500	411	352.84	40.4143	0.023524	1.81957e+11	1.81957e+11	4.28036e+09	1.08632e-05	39.1075		1950	411	672.366	45	0.0308782	2.04982e+11	2.04982e+11	6.32947e+09	1.3937e-05	50.1734		2450	411	1075.03	65.3143	0.0391084	2.30565e+11	2.30565e+11	9.01701e+09	1.72147e-05	61.9729		2950	411	1551.61	73.8857	0.0473404	2.56148e+11
1000	421	126.844	26.0571	0.0157072	1.56374e+11	1.56374e+11	2.45619e+09	7.32878e-06	26.3836		1500	421	353.812	41.6571	0.0238969	1.81957e+11	1.81957e+11	4.34821e+09	1.08584e-05	39.0903		1950	421	673.412	44.8286	0.0313826	2.04982e+11	2.04982e+11	6.43287e+09	1.39278e-05	50.1402		2450	421	1076.41	59.0143	0.0397647	2.30565e+11	2.30565e+11	9.16835e+09	1.71983e-05	61.914		2950	421	1553.36	75.0857	0.0481517	2.56148e+11
1000	431	127.431	25.1571	0.0159381	1.56374e+11	1.56374e+11	2.49231e+09	7.32705e-06	26.3774		1500	431	354.76	40.6286	0.0242636	1.81957e+11	1.81957e+11	4.41493e+09	1.08537e-05	39.0734		1950	431	674.895	63.5571	0.0318796	2.04982e+11	2.04982e+11	6.53473e+09	1.39188e-05	50.1076		2450	431	1077.85	61.5429	0.0404124	2.30565e+11	2.30565e+11	9.31766e+09	1.71822e-05	61.856		2950	431	1555.1	74.5714	0.0489531	2.56148e+11
1000	441	128.122	29.6143	0.0161648	1.56374e+11	1.56374e+11	2.52775e+09	7.32535e-06	26.3712		1500	441	354.225	-7.64286	0.0246242	1.81957e+11	1.81957e+11	4.48055e+09	1.08491e-05	39.0568		1950	441	676.015	48	0.0323692	2.04982e+11	2.04982e+11	6.63509e+09	1.39099e-05	50.0755		2450	441	1079.16	56.4	0.0410514	2.30565e+11	2.30565e+11	9.46501e+09	1.71663e-05	61.7988		2950	441	1556.91	77.8714	0.0497449	2.56148e+11
1000	451	128.754	27.0857	0.0163871	1.56374e+11	1.56374e+11	2.56252e+09	7.32368e-06	26.3652		1500	451	355.086	36.9	0.0249789	1.81957e+11	1.81957e+11	4.54509e+09	1.08446e-05	39.0405		1950	451	677.166	49.3286	0.0328516	2.04982e+11	2.04982e+11	6.73398e+09	1.39011e-05	50.0439		2450	451	1080.68	64.8857	0.0416821	2.30565e+11	2.30565e+11	9.61043e+09	1.71507e-05	61.7425		2950	451	1558.69	75.9857	0.0505274	2.56148e+11
1000	461	129.394	27.4286	0.0166053	1.56374e+11	1.56374e+11	2.59664e+09	7.32204e-06	26.3593		1500	461	355.983	38.4429	0.0253279	1.81957e+11	1.81957e+11	4.60858e+09	1.08401e-05	39.0245		1950	461	678.234	45.7714	0.0333271	2.04982e+11	2.04982e+11	6.83144e+09	1.38924e-05	50.0128		2450	461	1082.06	59.5286	0.0423047	2.30565e+11	2.30565e+11	9.75397e+09	1.71353e-05	61.687		2950	461	1560.46	75.9	0.0513006	2.56148e+11
1000	471	130.054	28.2857	0.0168195	1.56374e+11	1.56374e+11	2.63013e+09	7.32043e-06	26.3536		1500	471	356.84	36.7286	0.0256712	1.81957e+11	1.81957e+11	4.67105e+09	1.08358e-05	39.0087		1950	471	679.107	37.4143	0.0337957	2.04982e+11	2.04982e+11	6.9275e+09	1.38839e-05	49.9822		2450	471	1083.51	61.8	0.0429193	2.30565e+11	2.30565e+11	9.89569e+09	1.71201e-05	61.6324		2950	471	1562.23	75.8143	0.052065	2.56148e+11
1000	481	130.694	27.4286	0.0170296	1.56374e+11	1.56374e+11	2.66299e+09	7.31886e-06	26.3479		1500	481	357.704	37.0286	0.0260089	1.81957e+11	1.81957e+11	4.73251e+09	1.08315e-05	38.9932		1950	481	680.217	47.5714	0.0342576	2.04982e+11	2.04982e+11	7.02219e+09	1.38756e-05	49.952		2450	481	1085.02	64.9714	0.0435262	2.30565e+11	2.30565e+11	1.00356e+10	1.71051e-05	61.5785		2950	481	1564.02	76.7143	0.0528207	2.56148e+11
1000	491	131.28	25.1143	0.0172359	1.56374e+11	1.56374e+11	2.69525e+09	7.31731e-06	26.3423		1500	491	358.539	35.7857	0.0263413	1.81957e+11	1.81957e+11	4.79299e+09	1.08272e-05	38.978		1950	491	681.375	49.6286	0.0347131	2.04982e+11	2.04982e+11	7.11554e+09	1.38673e-05	49.9223		2450	491	1086.46	61.7143	0.0441255	2.30565e+11	2.30565e+11	1.01738e+10	1.70904e-05	61.5254		2950	491	1565.76	74.6571	0.0535678	2.56148e+11
1000	501	131.93	27.8571	0.0174384	1.56374e+11	1.56374e+11	2.72691e+09	7.31579e-06	26.3369		1500	501	359.326	33.7286	0.0266684	1.81957e+11	1.81957e+11	4.85251e+09	1.08231e-05	38.963		1950	501	682.556	50.6143	0.0351621	2.04982e+11	2.04982e+11	7.20759e+09	1.38592e-05	49.8931		2450	501	1087.96	64.0714	0.0447174	2.30565e+11	2.30565e+11	1.03102e+10	1.70758e-05	61.473		2950	501	1567.51	74.8286	0.0543067	2.56148e+11
1000	511	132.568	27.3429	0.0176371	1.56374e+11	1.56374e+11	2.75799e+09	7.3143e-06	26.3315		1500	511	360.197	37.3286	0.0269904	1.81957e+11	1.81957e+11	4.9111e+09	1.0819e-05	38.9483		1950	511	683.717	49.7571	0.0356049	2.04982e+11	2.04982e+11	7.29836e+09	1.38512e-05	49.8643		2450	511	1089.4	61.7143	0.045302	2.30565e+11	2.30565e+11	1.0445e+10	1.70615e-05	61.4213		2950	511	1562.58	-70.4	0.0550374	2.56148e+11
1000	521	133.21	27.5143	0.0178323	1.56374e+11	1.56374e+11	2.78851e+09	7.31284e-06	26.3262		1500	521	360.892	29.7857	0.0273073	1.81957e+11	1.81957e+11	4.96876e+09	1.08149e-05	38.9338		1950	521	684.86	48.9857	0.0360416	2.04982e+11	2.04982e+11	7.38787e+09	1.38433e-05	49.836		2450	521	1090.92	65.3143	0.0458796	2.30565e+11	2.30565e+11	1.05782e+10	1.70473e-05	61.3704		2950	521	1564.2	69.7286	0.0557602	2.56148e+11
1000	531	133.834	26.7429	0.0180238	1.56374e+11	1.56374e+11	2.81847e+09	7.31141e-06	26.3211		1500	531	361.662	33	0.0276193	1.81957e+11	1.81957e+11	5.02553e+09	1.0811e-05	38.9195		1950	531	686.001	48.9	0.0364723	2.04982e+11	2.04982e+11	7.47617e+09	1.38356e-05	49.808		2450	531	1092.42	64.0286	0.0464502	2.30565e+11	2.30565e+11	1.07098e+10	1.70334e-05	61.3202		2950	531	1565.85	70.6714	0.0564752	2.56148e+11
1000	541	134.515	29.1857	0.018212	1.56374e+11	1.56374e+11	2.84788e+09	7.31e-06	26.316		1500	541	362.481	35.1	0.0279265	1.81957e+11	1.81957e+11	5.08142e+09	1.08071e-05	38.9055		1950	541	687.141	48.8571	0.0368972	2.04982e+11	2.04982e+11	7.56326e+09	1.38279e-05	49.7805		2450	541	1093.87	62.1857	0.047014	2.30565e+11	2.30565e+11	1.08398e+10	1.70196e-05	61.2706		2950	541	1567.38	65.3571	0.0571827	2.56148e+11
1000	551	135.086	24.4714	0.0183967	1.56374e+11	1.56374e+11	2.87677e+09	7.30862e-06	26.311		1500	551	363.263	33.5143	0.0282289	1.81957e+11	1.81957e+11	5.13644e+09	1.08032e-05	38.8917		1950	551	688.234	46.8429	0.0373164	2.04982e+11	2.04982e+11	7.64919e+09	1.38204e-05	49.7534		2450	551	1095.43	67.0286	0.0475713	2.30565e+11	2.30565e+11	1.09683e+10	1.7006e-05	61.2217		2950	551	1568.96	67.8857	0.0578828	2.56148e+11
1000	561	135.749	28.4143	0.0185781	1.56374e+11	1.56374e+11	2.90513e+09	7.30727e-06	26.3062		1500	561	364.301	44.4857	0.0285267	1.81957e+11	1.81957e+11	5.19063e+09	1.07995e-05	38.8781		1950	561	689.366	48.5143	0.03773	2.04982e+11	2.04982e+11	7.73396e+09	1.38129e-05	49.7266		2450	561	1096.9	62.9143	0.048122	2.30565e+11	2.30565e+11	1.10952e+10	1.69926e-05	61.1734		2950	561	1570.56	68.2714	0.0585756	2.56148e+11
1000	571	136.413	28.4571	0.0187562	1.56374e+11	1.56374e+11	2.93299e+09	7.30593e-06	26.3014		1500	571	365.39	46.6714	0.0288199	1.81957e+11	1.81957e+11	5.24399e+09	1.07958e-05	38.8648		1950	571	690.495	48.3857	0.0381381	2.04982e+11	2.04982e+11	7.81762e+09	1.38056e-05	49.7003		2450	571	1098.39	64.0714	0.0486664	2.30565e+11	2.30565e+11	1.12207e+10	1.69794e-05	61.1258		2950	571	1572.06	64.5	0.0592613	2.56148e+11
1000	581	137.017	25.8857	0.0189312	1.56374e+11	1.56374e+11	2.96035e+09	7.30463e-06	26.2967		1500	581	366.227	35.8714	0.0291087	1.81957e+11	1.81957e+11	5.29654e+09	1.07921e-05	38.8516		1950	581	691.645	49.2857	0.0385408	2.04982e+11	2.04982e+11	7.90017e+09	1.37984e-05	49.6743		2450	581	1099.85	62.3143	0.0492045	2.30565e+11	2.30565e+11	1.13448e+10	1.69663e-05	61.0788		2950	581	1573.96	81.5143	0.05994	2.56148e+11
1000	591	137.644	26.8714	0.019103	1.56374e+11	1.56374e+11	2.98722e+09	7.30335e-06	26.292		1500	591	367.089	36.9429	0.0293932	1.81957e+11	1.81957e+11	5.34831e+09	1.07885e-05	38.8387		1950	591	692.854	51.8143	0.0389383	2.04982e+11	2.04982e+11	7.98164e+09	1.37913e-05	49.6487		2450	591	1100.93	15.4571	0.0497366	2.30565e+11	2.30565e+11	1.14675e+10	1.69534e-05	61.0324		2950	591	1575.16	51.1286	0.060612	2.56148e+11
1000	601	138.322	29.0571	0.0192718	1.56374e+11	1.56374e+11	3.01361e+09	7.30209e-06	26.2875		1500	601	367.922	35.7	0.0296734	1.81957e+11	1.81957e+11	5.39929e+09	1.0785e-05	38.8259		1950	601	694.109	53.7857	0.0393306	2.04982e+11	2.04982e+11	8.06206e+09	1.37843e-05	49.6234		2450	601	1102.35	61.0286	0.0502627	2.30565e+11	2.30565e+11	1.15888e+10	1.69407e-05	60.9866		2950	601	1576.79	69.9429	0.0612772	2.56148e+11
1000	611	138.937	26.3571	0.0194376	1.56374e+11	1.56374e+11	3.03954e+09	7.30085e-06	26.2831		1500	611	368.708	33.6857	0.0299495	1.81957e+11	1.81957e+11	5.44952e+09	1.07815e-05	38.8134		1950	611	695.303	51.1714	0.0397179	2.04982e+11	2.04982e+11	8.14145e+09	1.37774e-05	49.5985		2450	611	1103.63	54.6	0.0507829	2.30565e+11	2.30565e+11	1.17088e+10	1.69282e-05	60.9413		2950	611	1578.45	71.4429	0.061936	2.56148e+11
1000	621	139.562	26.7857	0.0196005	1.56374e+11	1.56374e+11	3.06501e+09	7.29963e-06	26.2787		1500	621	369.458	32.1429	0.0302214	1.81957e+11	1.81957e+11	5.499e+09	1.07781e-05	38.801		1950	621	696.524	52.3286	0.0401002	2.04982e+11	2.04982e+11	8.21982e+09	1.37705e-05	49.5739		2450	621	1105	58.8	0.0512974	2.30565e+11	2.30565e+11	1.18274e+10	1.69157e-05	60.8967		2950	621	1580.13	71.8714	0.0625883	2.56148e+11
1000	631	140.188	26.8286	0.0197605	1.56374e+11	1.56374e+11	3.09003e+09	7.29844e-06	26.2744		1500	631	370.183	31.0714	0.0304894	1.81957e+11	1.81957e+11	5.54776e+09	1.07747e-05	38.7889		1950	631	697.666	48.9429	0.0404777	2.04982e+11	2.04982e+11	8.29719e+09	1.37638e-05	49.5497		2450	631	1106.39	59.4	0.0518063	2.30565e+11	2.30565e+11	1.19447e+10	1.69035e-05	60.8525		2950	631	1581.81	72	0.0632344	2.56148e+11
1000	641	140.816	26.9143	0.0199177	1.56374e+11	1.56374e+11	3.11462e+09	7.29727e-06	26.2702		1500	641	371.09	38.8714	0.0307534	1.81957e+11	1.81957e+11	5.5958e+09	1.07714e-05	38.7769		1950	641	698.921	53.7857	0.0408504	2.04982e+11	2.04982e+11	8.37359e+09	1.37572e-05	49.5258		2450	641	1107.47	46.4143	0.0523097	2.30565e+11	2.30565e+11	1.20608e+10	1.68914e-05	60.809		2950	641	1583.5	72.5571	0.0638744	2.56148e+11
1000	651	140.286	-7.57143	0.0200722	1.56374e+11	1.56374e+11	3.13877e+09	7.29612e-06	26.266		1500	651	372.018	39.7714	0.0310135	1.81957e+11	1.81957e+11	5.64314e+09	1.07681e-05	38.7651		1950	651	700.117	51.2571	0.0412185	2.04982e+11	2.04982e+11	8.44904e+09	1.37506e-05	49.5022		2450	651	1108.77	55.9286	0.0528077	2.30565e+11	2.30565e+11	1.21756e+10	1.68794e-05	60.7659		2950	651	1585.14	69.9	0.0645083	2.56148e+11
1000	661	140.866	24.8571	0.020224	1.56374e+11	1.56374e+11	3.16251e+09	7.29499e-06	26.262		1500	661	372.884	37.1143	0.0312699	1.81957e+11	1.81957e+11	5.68979e+09	1.07649e-05	38.7535		1950	661	701.297	50.5714	0.0415819	2.04982e+11	2.04982e+11	8.52354e+09	1.37441e-05	49.4789		2450	661	1110.15	59.0143	0.0533004	2.30565e+11	2.30565e+11	1.22892e+10	1.68676e-05	60.7234		2950	661	1586.76	69.5571	0.0651363	2.56148e+11
1000	671	141.525	28.2429	0.0203731	1.56374e+11	1.56374e+11	3.18583e+09	7.29388e-06	26.258		1500	671	373.793	38.9571	0.0315226	1.81957e+11	1.81957e+11	5.73577e+09	1.07617e-05	38.742		1950	671	702.525	52.6286	0.0419409	2.04982e+11	2.04982e+11	8.59713e+09	1.37378e-05	49.456		2450	671	1111.52	58.8857	0.0537879	2.30565e+11	2.30565e+11	1.24016e+10	1.68559e-05	60.6814		2950	671	1588.43	71.5286	0.0657585	2.56148e+11
1000	681	142.141	26.4	0.0205197	1.56374e+11	1.56374e+11	3.20875e+09	7.29278e-06	26.254		1500	681	374.728	40.0714	0.0317717	1.81957e+11	1.81957e+11	5.78108e+09	1.07585e-05	38.7308		1950	681	703.71	50.7857	0.0422955	2.04982e+11	2.04982e+11	8.66981e+09	1.37315e-05	49.4333		2450	681	1112.95	61.2	0.0542703	2.30565e+11	2.30565e+11	1.25128e+10	1.68444e-05	60.6398		2950	681	1590.13	73.1143	0.066375	2.56148e+11
1000	691	142.567	18.2571	0.0206637	1.56374e+11	1.56374e+11	3.23127e+09	7.29171e-06	26.2502		1500	691	375.582	36.6	0.0320171	1.81957e+11	1.81957e+11	5.82575e+09	1.07555e-05	38.7197		1950	691	704.933	52.4143	0.0426458	2.04982e+11	2.04982e+11	8.74161e+09	1.37253e-05	49.411		2450	691	1114.35	60.0857	0.0547476	2.30565e+11	2.30565e+11	1.26229e+10	1.6833e-05	60.5988		2950	691	1591.84	73.2857	0.0669859	2.56148e+11
1000	701	143.064	21.3	0.0208053	1.56374e+11	1.56374e+11	3.25341e+09	7.29066e-06	26.2464		1500	701	376.498	39.2571	0.0322591	1.81957e+11	1.81957e+11	5.86978e+09	1.07524e-05	38.7087		1950	701	706.059	48.2571	0.0429918	2.04982e+11	2.04982e+11	8.81253e+09	1.37191e-05	49.3889		2450	701	1115.73	58.8	0.0552201	2.30565e+11	2.30565e+11	1.27318e+10	1.68217e-05	60.5582		2950	701	1593.5	71.0571	0.0675914	2.56148e+11
1000	711	143.812	32.0571	0.0209444	1.56374e+11	1.56374e+11	3.27516e+09	7.28962e-06	26.2426		1500	711	377.327	35.5286	0.0324977	1.81957e+11	1.81957e+11	5.91319e+09	1.07494e-05	38.6979		1950	711	707.313	53.7429	0.0433336	2.04982e+11	2.04982e+11	8.8826e+09	1.37131e-05	49.3671		2450	711	1117.13	60.0857	0.0556877	2.30565e+11	2.30565e+11	1.28396e+10	1.68106e-05	60.5181		2950	711	1595.25	74.9143	0.0681915	2.56148e+11
1000	721	144.273	19.7571	0.0210811	1.56374e+11	1.56374e+11	3.29655e+09	7.28861e-06	26.239		1500	721	378.225	38.4857	0.0327329	1.81957e+11	1.81957e+11	5.95598e+09	1.07465e-05	38.6873		1950	721	717.786	149.614	0.0436714	2.04982e+11	2.04982e+11	8.95184e+09	1.37071e-05	49.3456		2450	721	1118.51	59.3143	0.0561506	2.30565e+11	2.30565e+11	1.29464e+10	1.67996e-05	60.4785		2950	721	1596.98	74.1429	0.0687863	2.56148e+11
1000	731	144.968	29.7857	0.0212156	1.56374e+11	1.56374e+11	3.31757e+09	7.28761e-06	26.2354		1500	731	379.093	37.2	0.0329648	1.81957e+11	1.81957e+11	5.99818e+09	1.07436e-05	38.6769		1950	731	718.84	45.1714	0.0440051	2.04982e+11	2.04982e+11	9.02025e+09	1.37012e-05	49.3244		2450	731	1119.87	58.2429	0.0566089	2.30565e+11	2.30565e+11	1.3052e+10	1.67887e-05	60.4393		2950	731	1598.72	74.4	0.0693759	2.56148e+11
1000	741	145.459	21.0429	0.0213477	1.56374e+11	1.56374e+11	3.33823e+09	7.28663e-06	26.2319		1500	741	379.93	35.8714	0.0331934	1.81957e+11	1.81957e+11	6.03978e+09	1.07407e-05	38.6665		1950	741	719.939	47.1	0.0443349	2.04982e+11	2.04982e+11	9.08785e+09	1.36954e-05	49.3034		2450	741	1121.21	57.3857	0.0570625	2.30565e+11	2.30565e+11	1.31566e+10	1.67779e-05	60.4005		2950	741	1600.48	75.6429	0.0699604	2.56148e+11
1000	751	146.034	24.6429	0.0214776	1.56374e+11	1.56374e+11	3.35854e+09	7.28566e-06	26.2284		1500	751	380.818	38.0571	0.0334189	1.81957e+11	1.81957e+11	6.0808e+09	1.07379e-05	38.6564		1950	751	721.017	46.2	0.0446608	2.04982e+11	2.04982e+11	9.15466e+09	1.36896e-05	49.2827		2450	751	1122.59	58.9286	0.0575117	2.30565e+11	2.30565e+11	1.32602e+10	1.67673e-05	60.3622		2950	751	1602.19	73.2	0.0705399	2.56148e+11
1000	761	146.58	23.4	0.0216052	1.56374e+11	1.56374e+11	3.3785e+09	7.28471e-06	26.225		1500	761	381.733	39.2143	0.0336412	1.81957e+11	1.81957e+11	6.12126e+09	1.07351e-05	38.6464		1950	761	722.118	47.1857	0.0449829	2.04982e+11	2.04982e+11	9.22068e+09	1.3684e-05	49.2623		2450	761	1124.03	62.0571	0.0579565	2.30565e+11	2.30565e+11	1.33627e+10	1.67568e-05	60.3243		2950	761	1603.93	74.5714	0.0711145	2.56148e+11
1000	771	147.142	24.0857	0.0217308	1.56374e+11	1.56374e+11	3.39813e+09	7.28378e-06	26.2216		1500	771	382.661	39.7714	0.0338605	1.81957e+11	1.81957e+11	6.16115e+09	1.07324e-05	38.6365		1950	771	723.227	47.5286	0.0453013	2.04982e+11	2.04982e+11	9.28594e+09	1.36784e-05	49.2421		2450	771	1125.44	60.4714	0.0583969	2.30565e+11	2.30565e+11	1.34643e+10	1.67464e-05	60.2869		2950	771	1605.65	73.6286	0.0716843	2.56148e+11
1000	781	147.692	23.5714	0.0218542	1.56374e+11	1.56374e+11	3.41743e+09	7.28287e-06	26.2183		1500	781	383.606	40.5	0.0340767	1.81957e+11	1.81957e+11	6.2005e+09	1.07297e-05	38.6268		1950	781	724.359	48.5143	0.045616	2.04982e+11	2.04982e+11	9.35045e+09	1.36728e-05	49.2222		2450	781	1126.88	61.6286	0.0588331	2.30565e+11	2.30565e+11	1.35648e+10	1.67361e-05	60.2498		2950	781	1607.38	74.4429	0.0722493	2.56148e+11
1000	791	148.272	24.8571	0.0219755	1.56374e+11	1.56374e+11	3.4364e+09	7.28196e-06	26.2151		1500	791	384.498	38.2286	0.03429	1.81957e+11	1.81957e+11	6.23931e+09	1.0727e-05	38.6172		1950	791	725.504	49.0714	0.0459271	2.04982e+11	2.04982e+11	9.41421e+09	1.36674e-05	49.2025		2450	791	1128.3	60.9	0.059265	2.30565e+11	2.30565e+11	1.36644e+10	1.67259e-05	60.2131		2950	791	1609.04	71.1429	0.0728096	2.56148e+11
1000	801	148.827	23.7857	0.0220948	1.56374e+11	1.56374e+11	3.45505e+09	7.28108e-06	26.2119		1500	801	385.427	39.8143	0.0345003	1.81957e+11	1.81957e+11	6.27758e+09	1.07244e-05	38.6077		1950	801	726.625	48.0429	0.0462346	2.04982e+11	2.04982e+11	9.47725e+09	1.3662e-05	49.183		2450	801	1129.76	62.3571	0.0596929	2.30565e+11	2.30565e+11	1.37631e+10	1.67158e-05	60.1769		2950	801	1605.26	-54.0714	0.0733654	2.56148e+11
1000	811	149.373	23.4	0.0222121	1.56374e+11	1.56374e+11	3.4734e+09	7.28021e-06	26.2088		1500	811	386.369	40.3714	0.0347078	1.81957e+11	1.81957e+11	6.31534e+09	1.07218e-05	38.5984		1950	811	727.698	45.9857	0.0465386	2.04982e+11	2.04982e+11	9.53957e+09	1.36566e-05	49.1638		2450	811	1131.26	64.1571	0.0601167	2.30565e+11	2.30565e+11	1.38608e+10	1.67058e-05	60.141		2950	811	1606.74	63.5143	0.0739166	2.56148e+11
1000	821	149.935	24.0857	0.0223274	1.56374e+11	1.56374e+11	3.49143e+09	7.27935e-06	26.2057		1500	821	387.261	38.2286	0.0349125	1.81957e+11	1.81957e+11	6.35259e+09	1.07192e-05	38.5892		1950	821	728.772	46.0286	0.0468392	2.04982e+11	2.04982e+11	9.60119e+09	1.36513e-05	49.1448		2450	821	1132.74	63.7714	0.0605365	2.30565e+11	2.30565e+11	1.39576e+10	1.6696e-05	60.1055		2950	821	1608.35	68.8714	0.0744634	2.56148e+11
1000	831	150.451	22.1143	0.0224408	1.56374e+11	1.56374e+11	3.50917e+09	7.27851e-06	26.2026		1500	831	388.183	39.5143	0.0351145	1.81957e+11	1.81957e+11	6.38933e+09	1.07167e-05	38.5801		1950	831	729.891	47.9571	0.0471365	2.04982e+11	2.04982e+11	9.66211e+09	1.36461e-05	49.1261		2450	831	1134.18	61.5	0.0609524	2.30565e+11	2.30565e+11	1.40535e+10	1.66862e-05	60.0703		2950	831	1609.98	69.9857	0.0750059	2.56148e+11
1000	841	150.981	22.7143	0.0225524	1.56374e+11	1.56374e+11	3.52661e+09	7.27769e-06	26.1997		1500	841	389.144	41.1857	0.0353137	1.81957e+11	1.81957e+11	6.42558e+09	1.07142e-05	38.5712		1950	841	730.939	44.9143	0.0474304	2.04982e+11	2.04982e+11	9.72236e+09	1.3641e-05	49.1076		2450	841	1135.68	64.4571	0.0613644	2.30565e+11	2.30565e+11	1.41485e+10	1.66765e-05	60.0356		2950	841	1611.34	58.4143	0.075544	2.56148e+11
1000	851	151.47	20.9571	0.022662	1.56374e+11	1.56374e+11	3.54376e+09	7.27687e-06	26.1967		1500	851	390.072	39.7714	0.0355103	1.81957e+11	1.81957e+11	6.46135e+09	1.07118e-05	38.5624		1950	851	732.05	47.6143	0.047721	2.04982e+11	2.04982e+11	9.78193e+09	1.36359e-05	49.0893		2450	851	1137.13	61.8429	0.0617727	2.30565e+11	2.30565e+11	1.42426e+10	1.6667e-05	60.0012		2950	851	1613	70.8429	0.0760779	2.56148e+11
1000	861	152.08	26.1429	0.0227699	1.56374e+11	1.56374e+11	3.56063e+09	7.27607e-06	26.1939		1500	861	390.968	38.4	0.0357042	1.81957e+11	1.81957e+11	6.49664e+09	1.07094e-05	38.5537		1950	861	733.183	48.5571	0.0480084	2.04982e+11	2.04982e+11	9.84085e+09	1.36309e-05	49.0712		2450	861	1138.54	60.4286	0.0621772	2.30565e+11	2.30565e+11	1.43359e+10	1.66575e-05	59.9671		2950	861	1614.33	57.3429	0.0766076	2.56148e+11
1000	871	152.624	23.3143	0.022876	1.56374e+11	1.56374e+11	3.57721e+09	7.27529e-06	26.191		1500	871	391.883	39.2143	0.0358956	1.81957e+11	1.81957e+11	6.53145e+09	1.0707e-05	38.5451		1950	871	734.316	48.5571	0.0482927	2.04982e+11	2.04982e+11	9.89912e+09	1.36259e-05	49.0533		2450	871	1139.99	62.4429	0.062578	2.30565e+11	2.30565e+11	1.44283e+10	1.66482e-05	59.9334		2950	871	1615.87	66	0.0771332	2.56148e+11
1000	881	153.209	25.0714	0.0229803	1.56374e+11	1.56374e+11	3.59353e+09	7.27451e-06	26.1883		1500	881	392.803	39.4286	0.0360844	1.81957e+11	1.81957e+11	6.56581e+09	1.07046e-05	38.5366		1950	881	735.439	48.1286	0.0485738	2.04982e+11	2.04982e+11	9.95675e+09	1.3621e-05	49.0356		2450	881	1136.09	-55.7429	0.0629752	2.30565e+11	2.30565e+11	1.45199e+10	1.66389e-05	59.9001		2950	881	1617.49	69.1714	0.0776548	2.56148e+11
1000	891	153.809	25.7143	0.0230829	1.56374e+11	1.56374e+11	3.60958e+09	7.27376e-06	26.1855		1500	891	393.753	40.7143	0.0362707	1.81957e+11	1.81957e+11	6.59972e+09	1.07023e-05	38.5283		1950	891	736.604	49.9286	0.0488519	2.04982e+11	2.04982e+11	1.00138e+10	1.36161e-05	49.0181		2450	891	1137.46	58.7571	0.0633688	2.30565e+11	2.30565e+11	1.46106e+10	1.66297e-05	59.867		2950	891	1619.19	72.7714	0.0781725	2.56148e+11
1000	901	154.397	25.2	0.0231839	1.56374e+11	1.56374e+11	3.62536e+09	7.27301e-06	26.1828		1500	901	394.658	38.7857	0.0364546	1.81957e+11	1.81957e+11	6.63318e+09	1.07e-05	38.5201		1950	901	737.775	50.1857	0.049127	2.04982e+11	2.04982e+11	1.00701e+10	1.36114e-05	49.0009		2450	901	1138.87	60.4714	0.063759	2.30565e+11	2.30565e+11	1.47006e+10	1.66206e-05	59.8343		2950	901	1620.7	64.9286	0.0786862	2.56148e+11
1000	911	155.014	26.4429	0.0232832	1.56374e+11	1.56374e+11	3.64089e+09	7.27227e-06	26.1802		1500	911	395.597	40.2429	0.0366361	1.81957e+11	1.81957e+11	6.6662e+09	1.06978e-05	38.5119		1950	911	738.872	47.0143	0.0493991	2.04982e+11	2.04982e+11	1.01259e+10	1.36066e-05	48.9838		2450	911	1140.18	56.1857	0.0641457	2.30565e+11	2.30565e+11	1.47897e+10	1.66117e-05	59.802		2950	911	1622.49	76.7571	0.079196	2.56148e+11
1000	921	155.628	26.3143	0.0233808	1.56374e+11	1.56374e+11	3.65616e+09	7.27155e-06	26.1776		1500	921	404.209	123.029	0.0368152	1.81957e+11	1.81957e+11	6.69879e+09	1.06955e-05	38.5039		1950	921	739.99	47.9143	0.0496683	2.04982e+11	2.04982e+11	1.01811e+10	1.36019e-05	48.9669		2450	921	1141.56	58.8857	0.064529	2.30565e+11	2.30565e+11	1.48781e+10	1.66028e-05	59.7699		2950	921	1624.14	70.5857	0.0797021	2.56148e+11
1000	931	156.194	24.2571	0.0234769	1.56374e+11	1.56374e+11	3.67118e+09	7.27084e-06	26.175		1500	931	405.07	36.9	0.036992	1.81957e+11	1.81957e+11	6.73096e+09	1.06933e-05	38.496		1950	931	741.158	50.0571	0.0499346	2.04982e+11	2.04982e+11	1.02357e+10	1.35973e-05	48.9502		2450	931	1142.91	58.0286	0.0649089	2.30565e+11	2.30565e+11	1.49657e+10	1.65939e-05	59.7382		2950	931	1625.8	71.2714	0.0802044	2.56148e+11
1000	941	156.797	25.8429	0.0235714	1.56374e+11	1.56374e+11	3.68596e+09	7.27014e-06	26.1725		1500	941	405.922	36.5143	0.0371665	1.81957e+11	1.81957e+11	6.7627e+09	1.06912e-05	38.4882		1950	941	742.339	50.6143	0.0501981	2.04982e+11	2.04982e+11	1.02897e+10	1.35927e-05	48.9337		2450	941	1144.36	62.0571	0.0652855	2.30565e+11	2.30565e+11	1.50525e+10	1.65852e-05	59.7067		2950	941	1627.36	66.6429	0.0807031	2.56148e+11
1000	951	157.432	27.2143	0.0236643	1.56374e+11	1.56374e+11	3.70049e+09	7.26945e-06	26.17		1500	951	406.671	32.1	0.0373387	1.81957e+11	1.81957e+11	6.79404e+09	1.0689e-05	38.4805		1950	951	743.494	49.5	0.0504588	2.04982e+11	2.04982e+11	1.03431e+10	1.35882e-05	48.9174		2450	951	1145.66	55.5857	0.0656589	2.30565e+11	2.30565e+11	1.51386e+10	1.65766e-05	59.6756		2950	951	1628.95	68.2286	0.0811981	2.56148e+11
1000	961	157.986	23.7429	0.0237558	1.56374e+11	1.56374e+11	3.71479e+09	7.26878e-06	26.1676		1500	961	407.724	45.1286	0.0375087	1.81957e+11	1.81957e+11	6.82498e+09	1.06869e-05	38.473		1950	961	744.706	51.9429	0.0507168	2.04982e+11	2.04982e+11	1.0396e+10	1.35837e-05	48.9013		2450	961	1147.14	63.6857	0.0660291	2.30565e+11	2.30565e+11	1.5224e+10	1.6568e-05	59.6448		2950	961	1630.6	70.6714	0.0816896	2.56148e+11
1000	971	158.627	27.4714	0.0238458	1.56374e+11	1.56374e+11	3.72886e+09	7.26811e-06	26.1652		1500	971	408.535	34.7571	0.0376765	1.81957e+11	1.81957e+11	6.85552e+09	1.06848e-05	38.4655		1950	971	745.862	49.5429	0.050972	2.04982e+11	2.04982e+11	1.04483e+10	1.35793e-05	48.8854		2450	971	1148.58	61.4571	0.0663961	2.30565e+11	2.30565e+11	1.53086e+10	1.65595e-05	59.6142		2950	971	1632.27	71.7429	0.0821775	2.56148e+11
1000	981	159.219	25.3714	0.0239343	1.56374e+11	1.56374e+11	3.7427e+09	7.26746e-06	26.1628		1500	981	409.312	33.3	0.0378422	1.81957e+11	1.81957e+11	6.88566e+09	1.06828e-05	38.4581		1950	981	747.04	50.4857	0.0512246	2.04982e+11	2.04982e+11	1.05001e+10	1.35749e-05	48.8696		2450	981	1149.95	58.8	0.0667601	2.30565e+11	2.30565e+11	1.53925e+10	1.65511e-05	59.584		2950	981	1633.98	73.0714	0.0826619	2.56148e+11
1000	991	159.855	27.2571	0.0240214	1.56374e+11	1.56374e+11	3.75632e+09	7.26681e-06	26.1605		1500	991	410.172	36.8571	0.0380058	1.81957e+11	1.81957e+11	6.91542e+09	1.06808e-05	38.4508		1950	991	748.259	52.2429	0.0514746	2.04982e+11	2.04982e+11	1.05513e+10	1.35706e-05	48.854		2450	991	1150.94	42.3429	0.0671209	2.30565e+11	2.30565e+11	1.54757e+10	1.65428e-05	59.554		2950	991	1635.66	71.9571	0.0831429	2.56148e+11
1000	1001	160.491	27.2571	0.024107	1.56374e+11	1.56374e+11	3.76972e+09	7.26618e-06	26.1582		1500	1001	410.865	29.7	0.0381673	1.81957e+11	1.81957e+11	6.94481e+09	1.06788e-05	38.4436		1950	1001	746	-32.2714	0.051722	2.04982e+11	2.04982e+11	1.06021e+10	1.35663e-05	48.8386		2450	1001	1152.35	60.6857	0.0674787	2.30565e+11	2.30565e+11	1.55582e+10	1.65345e-05	59.5244		2950	1001	1637.33	71.6143	0.0836206	2.56148e+11
1000	1011	161.094	25.8429	0.0241914	1.56374e+11	1.56374e+11	3.7829e+09	7.26556e-06	26.156		1500	1011	411.582	30.7286	0.0383267	1.81957e+11	1.81957e+11	6.97382e+09	1.06768e-05	38.4365		1950	1011	747.103	47.2714	0.0519668	2.04982e+11	2.04982e+11	1.06522e+10	1.3562e-05	48.8233		2450	1011	1153.76	60.1714	0.0678336	2.30565e+11	2.30565e+11	1.564e+10	1.65264e-05	59.495		2950	1011	1639	71.6571	0.0840949	2.56148e+11
1000	1021	161.653	23.9571	0.0242743	1.56374e+11	1.56374e+11	3.79587e+09	7.26494e-06	26.1538		1500	1021	412.447	37.0714	0.0384841	1.81957e+11	1.81957e+11	7.00246e+09	1.06748e-05	38.4295		1950	1021	748.239	48.6857	0.0522091	2.04982e+11	2.04982e+11	1.07019e+10	1.35578e-05	48.8082		2450	1021	1155.23	63.2143	0.0681855	2.30565e+11	2.30565e+11	1.57212e+10	1.65183e-05	59.4658		2950	1021	1640.69	72.6	0.0845659	2.56148e+11
1000	1031	162.289	27.2571	0.0243559	1.56374e+11	1.56374e+11	3.80864e+09	7.26434e-06	26.1516		1500	1031	413.343	38.4	0.0386396	1.81957e+11	1.81957e+11	7.03074e+09	1.06729e-05	38.4225		1950	1031	749.319	46.2857	0.052449	2.04982e+11	2.04982e+11	1.07511e+10	1.35537e-05	48.7933		2450	1031	1156.59	58.3286	0.0685345	2.30565e+11	2.30565e+11	1.58016e+10	1.65103e-05	59.437		2950	1031	1642.4	73.1143	0.0850337	2.56148e+11
1000	1041	162.879	25.2857	0.0244362	1.56374e+11	1.56374e+11	3.8212e+09	7.26375e-06	26.1495		1500	1041	414.206	36.9857	0.038793	1.81957e+11	1.81957e+11	7.05867e+09	1.0671e-05	38.4157		1950	1041	750.474	49.5	0.0526864	2.04982e+11	2.04982e+11	1.07998e+10	1.35496e-05	48.7785		2450	1041	1158.05	62.6143	0.0688807	2.30565e+11	2.30565e+11	1.58815e+10	1.65023e-05	59.4084		2950	1041	1644.11	73.3714	0.0854983	2.56148e+11
1000	1051	163.496	26.4429	0.0245153	1.56374e+11	1.56374e+11	3.83355e+09	7.26316e-06	26.1474		1500	1051	415.047	36.0429	0.0389446	1.81957e+11	1.81957e+11	7.08625e+09	1.06692e-05	38.409		1950	1051	751.52	44.8286	0.0529214	2.04982e+11	2.04982e+11	1.08479e+10	1.35455e-05	48.7639		2450	1051	1159.41	58.1143	0.069224	2.30565e+11	2.30565e+11	1.59606e+10	1.64945e-05	59.38		2950	1051	1645.67	66.8571	0.0859597	2.56148e+11
1000	1061	164.02	22.4571	0.024593	1.56374e+11	1.56374e+11	3.84571e+09	7.26259e-06	26.1453		1500	1061	415.921	37.4571	0.0390943	1.81957e+11	1.81957e+11	7.11348e+09	1.06673e-05	38.4023		1950	1061	752.512	42.5143	0.0531541	2.04982e+11	2.04982e+11	1.08956e+10	1.35415e-05	48.7495		2450	1061	1160.78	58.7143	0.0695646	2.30565e+11	2.30565e+11	1.60391e+10	1.64867e-05	59.352		2950	1061	1647.44	75.6	0.0864181	2.56148e+11
1000	1071	164.636	26.4	0.0246696	1.56374e+11	1.56374e+11	3.85768e+09	7.26203e-06	26.1433		1500	1071	416.71	33.8143	0.0392421	1.81957e+11	1.81957e+11	7.14037e+09	1.06655e-05	38.3957		1950	1071	753.563	45.0429	0.0533844	2.04982e+11	2.04982e+11	1.09428e+10	1.35375e-05	48.7352		2450	1071	1162.14	58.4143	0.0699024	2.30565e+11	2.30565e+11	1.6117e+10	1.64789e-05	59.3241		2950	1071	1649.08	70.3714	0.0868733	2.56148e+11
1000	1081	165.234	25.6286	0.0247449	1.56374e+11	1.56374e+11	3.86946e+09	7.26147e-06	26.1413		1500	1081	417.606	38.4	0.039388	1.81957e+11	1.81957e+11	7.16693e+09	1.06637e-05	38.3892		1950	1081	754.67	47.4429	0.0536124	2.04982e+11	2.04982e+11	1.09896e+10	1.35336e-05	48.721		2450	1081	1163.61	62.7857	0.0702375	2.30565e+11	2.30565e+11	1.61943e+10	1.64713e-05	59.2966		2950	1081	1644.15	-70.3714	0.0873256	2.56148e+11
1000	1091	165.812	24.7714	0.024819	1.56374e+11	1.56374e+11	3.88105e+09	7.26092e-06	26.1393		1500	1091	418.383	33.3	0.0395322	1.81957e+11	1.81957e+11	7.19316e+09	1.06619e-05	38.3828		1950	1091	755.956	55.1143	0.0538381	2.04982e+11	2.04982e+11	1.10358e+10	1.35297e-05	48.707		2450	1091	1165.07	62.6143	0.07057	2.30565e+11	2.30565e+11	1.6271e+10	1.64637e-05	59.2692		2950	1091	1645.76	68.8286	0.0877748	2.56148e+11
1000	1101	166.369	23.8714	0.0248919	1.56374e+11	1.56374e+11	3.89245e+09	7.26038e-06	26.1374		1500	1101	419.217	35.7429	0.0396745	1.81957e+11	1.81957e+11	7.21906e+09	1.06601e-05	38.3765		1950	1101	757.064	47.4857	0.0540616	2.04982e+11	2.04982e+11	1.10817e+10	1.35259e-05	48.6932		2450	1101	1166.54	63.1714	0.0708998	2.30565e+11	2.30565e+11	1.6347e+10	1.64561e-05	59.2421		2950	1101	1647.29	65.7	0.0882211	2.56148e+11
1000	1111	166.965	25.5429	0.0249637	1.56374e+11	1.56374e+11	3.90368e+09	7.25986e-06	26.1355		1500	1111	420.093	37.5429	0.0398151	1.81957e+11	1.81957e+11	7.24465e+09	1.06584e-05	38.3703		1950	1111	758.176	47.6571	0.0542829	2.04982e+11	2.04982e+11	1.1127e+10	1.35221e-05	48.6795		2450	1111	1167.97	61.1571	0.071227	2.30565e+11	2.30565e+11	1.64224e+10	1.64487e-05	59.2153		2950	1111	1648.76	62.8714	0.0886645	2.56148e+11
1000	1121	167.56	25.5	0.0250343	1.56374e+11	1.56374e+11	3.91472e+09	7.25933e-06	26.1336		1500	1121	420.928	35.7857	0.039954	1.81957e+11	1.81957e+11	7.26992e+09	1.06567e-05	38.3641		1950	1121	759.266	46.7143	0.0545021	2.04982e+11	2.04982e+11	1.11719e+10	1.35183e-05	48.6659		2450	1121	1169.38	60.3429	0.0715517	2.30565e+11	2.30565e+11	1.64973e+10	1.64413e-05	59.1886		2950	1121	1650.35	68.3143	0.089105	2.56148e+11
1000	1131	168.164	25.8857	0.0251039	1.56374e+11	1.56374e+11	3.9256e+09	7.25882e-06	26.1318		1500	1131	421.791	36.9857	0.0400912	1.81957e+11	1.81957e+11	7.29488e+09	1.0655e-05	38.358		1950	1131	760.336	45.8571	0.054719	2.04982e+11	2.04982e+11	1.12164e+10	1.35146e-05	48.6525		2450	1131	1170.8	61.1571	0.0718738	2.30565e+11	2.30565e+11	1.65716e+10	1.6434e-05	59.1622		2950	1131	1652	70.5857	0.0895427	2.56148e+11
1000	1141	168.729	24.2143	0.0251723	1.56374e+11	1.56374e+11	3.9363e+09	7.25832e-06	26.1299		1500	1141	422.647	36.6857	0.0402267	1.81957e+11	1.81957e+11	7.31953e+09	1.06533e-05	38.352		1950	1141	761.197	36.9	0.0549339	2.04982e+11	2.04982e+11	1.12604e+10	1.35109e-05	48.6392		2450	1141	1172.26	62.4	0.0721935	2.30565e+11	2.30565e+11	1.66453e+10	1.64267e-05	59.1361		2950	1141	1653.61	68.8714	0.0899775	2.56148e+11
1000	1151	169.377	27.7714	0.0252396	1.56374e+11	1.56374e+11	3.94683e+09	7.25782e-06	26.1282		1500	1151	423.513	37.1143	0.0403605	1.81957e+11	1.81957e+11	7.34389e+09	1.06517e-05	38.3461		1950	1151	762.336	48.8143	0.0551467	2.04982e+11	2.04982e+11	1.13041e+10	1.35072e-05	48.626		2450	1151	1173.75	63.6857	0.0725106	2.30565e+11	2.30565e+11	1.67184e+10	1.64195e-05	59.1101		2950	1151	1655.1	64.2	0.0904096	2.56148e+11
1000	1161	170.012	27.2143	0.0253059	1.56374e+11	1.56374e+11	3.9572e+09	7.25733e-06	26.1264		1500	1161	424.427	39.1714	0.0404928	1.81957e+11	1.81957e+11	7.36795e+09	1.06501e-05	38.3402		1950	1161	763.503	50.0143	0.0553574	2.04982e+11	2.04982e+11	1.13473e+10	1.35036e-05	48.613		2450	1161	1175.18	61.5	0.0728254	2.30565e+11	2.30565e+11	1.6791e+10	1.64123e-05	59.0844		2950	1161	1656.72	69.3	0.090839	2.56148e+11
1000	1171	170.58	24.3429	0.0253712	1.56374e+11	1.56374e+11	3.9674e+09	7.25685e-06	26.1247		1500	1171	425.327	38.5714	0.0406234	1.81957e+11	1.81957e+11	7.39171e+09	1.06484e-05	38.3344		1950	1171	764.687	50.7429	0.055566	2.04982e+11	2.04982e+11	1.139e+10	1.35e-05	48.6001		2450	1171	1176.64	62.4	0.0731377	2.30565e+11	2.30565e+11	1.6863e+10	1.64053e-05	59.0589		2950	1171	1657.75	43.9286	0.0912657	2.56148e+11
1000	1181	171.13	23.5714	0.0254354	1.56374e+11	1.56374e+11	3.97744e+09	7.25638e-06	26.123		1500	1181	426.255	39.7714	0.0407524	1.81957e+11	1.81957e+11	7.41519e+09	1.06469e-05	38.3287		1950	1181	765.818	48.4714	0.0557727	2.04982e+11	2.04982e+11	1.14324e+10	1.34965e-05	48.5874		2450	1181	1178.08	61.8429	0.0734477	2.30565e+11	2.30565e+11	1.69344e+10	1.63982e-05	59.0336		2950	1181	1659.52	75.8571	0.0916897	2.56148e+11
1000	1191	171.788	28.2	0.0254986	1.56374e+11	1.56374e+11	3.98733e+09	7.25591e-06	26.1213		1500	1191	427.101	36.2571	0.0408799	1.81957e+11	1.81957e+11	7.43838e+09	1.06453e-05	38.3231		1950	1191	767.007	50.9571	0.0559774	2.04982e+11	2.04982e+11	1.14743e+10	1.3493e-05	48.5747		2450	1191	1179.59	64.7143	0.0737553	2.30565e+11	2.30565e+11	1.70054e+10	1.63913e-05	59.0086		2950	1191	1661.1	68.0571	0.0921111	2.56148e+11
1000	1201	172.41	26.6571	0.0255609	1.56374e+11	1.56374e+11	3.99706e+09	7.25545e-06	26.1196		1500	1201	427.963	36.9429	0.0410058	1.81957e+11	1.81957e+11	7.4613e+09	1.06437e-05	38.3175		1950	1201	768.183	50.4	0.0561801	2.04982e+11	2.04982e+11	1.15159e+10	1.34895e-05	48.5622		2450	1201	1181.06	62.8286	0.0740606	2.30565e+11	2.30565e+11	1.70758e+10	1.63844e-05	58.9837		2950	1201	1662.73	69.9	0.0925298	2.56148e+11
1000	1211	172.966	23.8286	0.0256221	1.56374e+11	1.56374e+11	4.00664e+09	7.255e-06	26.118		1500	1211	428.885	39.5143	0.0411302	1.81957e+11	1.81957e+11	7.48394e+09	1.06422e-05	38.312		1950	1211	769.22	44.4429	0.0563809	2.04982e+11	2.04982e+11	1.15571e+10	1.34861e-05	48.5499		2450	1211	1191.52	149.514	0.0743636	2.30565e+11	2.30565e+11	1.71456e+10	1.63775e-05	58.9591		2950	1211	1664.39	70.9714	0.092946	2.56148e+11
1000	1221	173.635	28.6714	0.0256824	1.56374e+11	1.56374e+11	4.01607e+09	7.25456e-06	26.1164		1500	1221	429.772	38.0143	0.0412531	1.81957e+11	1.81957e+11	7.5063e+09	1.06407e-05	38.3065		1950	1221	770.373	49.4143	0.0565798	2.04982e+11	2.04982e+11	1.15978e+10	1.34827e-05	48.5376		2450	1221	1192.81	55.2	0.0746644	2.30565e+11	2.30565e+11	1.7215e+10	1.63707e-05	58.9346		2950	1221	1665.98	68.0571	0.0933597	2.56148e+11
1000	1231	174.225	25.2857	0.0257418	1.56374e+11	1.56374e+11	4.02535e+09	7.25412e-06	26.1148		1500	1231	430.667	38.3571	0.0413746	1.81957e+11	1.81957e+11	7.5284e+09	1.06392e-05	38.3012		1950	1231	771.472	47.1	0.0567769	2.04982e+11	2.04982e+11	1.16382e+10	1.34793e-05	48.5255		2450	1231	1194.08	54.4286	0.0749629	2.30565e+11	2.30565e+11	1.72838e+10	1.6364e-05	58.9104		2950	1231	1667.37	59.7	0.0937708	2.56148e+11
1000	1241	174.806	24.9	0.0258002	1.56374e+11	1.56374e+11	4.03448e+09	7.25369e-06	26.1133		1500	1241	431.626	41.1	0.0414946	1.81957e+11	1.81957e+11	7.55024e+09	1.06377e-05	38.2958		1950	1241	772.624	49.3714	0.056972	2.04982e+11	2.04982e+11	1.16782e+10	1.3476e-05	48.5135		2450	1241	1195.41	57.0857	0.0752592	2.30565e+11	2.30565e+11	1.73521e+10	1.63573e-05	58.8863		2950	1241	1669.15	76.1143	0.0941795	2.56148e+11
1000	1251	175.373	24.3	0.0258577	1.56374e+11	1.56374e+11	4.04348e+09	7.25327e-06	26.1118		1500	1251	432.415	33.8143	0.0416132	1.81957e+11	1.81957e+11	7.57181e+09	1.06363e-05	38.2906		1950	1251	773.771	49.1571	0.0571654	2.04982e+11	2.04982e+11	1.17179e+10	1.34727e-05	48.5016		2450	1251	1196.72	55.9714	0.0755534	2.30565e+11	2.30565e+11	1.74199e+10	1.63507e-05	58.8625		2950	1251	1670.73	67.6286	0.0945857	2.56148e+11
1000	1261	175.996	26.7	0.0259143	1.56374e+11	1.56374e+11	4.05233e+09	7.25285e-06	26.1103		1500	1261	433.34	39.6429	0.0417303	1.81957e+11	1.81957e+11	7.59313e+09	1.06348e-05	38.2854		1950	1261	774.984	51.9857	0.0573569	2.04982e+11	2.04982e+11	1.17571e+10	1.34694e-05	48.4898		2450	1261	1198.04	56.4429	0.0758454	2.30565e+11	2.30565e+11	1.74873e+10	1.63441e-05	58.8388		2950	1261	1672.41	72.0857	0.0949895	2.56148e+11
1000	1271	176.598	25.8	0.0259701	1.56374e+11	1.56374e+11	4.06105e+09	7.25244e-06	26.1088		1500	1271	434.204	37.0286	0.0418461	1.81957e+11	1.81957e+11	7.6142e+09	1.06334e-05	38.2803		1950	1271	776.135	49.3286	0.0575467	2.04982e+11	2.04982e+11	1.1796e+10	1.34662e-05	48.4782		2450	1271	1199.33	55.4143	0.0761353	2.30565e+11	2.30565e+11	1.75541e+10	1.63376e-05	58.8153		2950	1271	1674.04	69.8143	0.0953909	2.56148e+11
1000	1281	177.175	24.7286	0.026025	1.56374e+11	1.56374e+11	4.06963e+09	7.25204e-06	26.1073		1500	1281	435.129	39.6429	0.0419605	1.81957e+11	1.81957e+11	7.63501e+09	1.0632e-05	38.2753		1950	1281	777.315	50.5714	0.0577347	2.04982e+11	2.04982e+11	1.18346e+10	1.3463e-05	48.4666		2450	1281	1200.62	55.4143	0.0764231	2.30565e+11	2.30565e+11	1.76205e+10	1.63311e-05	58.792		2950	1281	1675.74	72.8571	0.09579	2.56148e+11
1000	1291	177.777	25.8	0.026079	1.56374e+11	1.56374e+11	4.07808e+09	7.25164e-06	26.1059		1500	1291	436.022	38.2714	0.0420735	1.81957e+11	1.81957e+11	7.65558e+09	1.06306e-05	38.2703		1950	1291	778.496	50.6143	0.0579209	2.04982e+11	2.04982e+11	1.18727e+10	1.34598e-05	48.4552		2450	1291	1201.91	55.0714	0.0767088	2.30565e+11	2.30565e+11	1.76863e+10	1.63247e-05	58.7689		2950	1291	1677.2	62.6143	0.0961866	2.56148e+11
1000	1301	178.362	25.0714	0.0261322	1.56374e+11	1.56374e+11	4.0864e+09	7.25125e-06	26.1045		1500	1301	435.995	-0.385714	0.0421853	1.81957e+11	1.81957e+11	7.67591e+09	1.06293e-05	38.2653		1950	1301	779.692	51.2571	0.0581054	2.04982e+11	2.04982e+11	1.19106e+10	1.34566e-05	48.4439		2450	1301	1203.23	56.5286	0.0769924	2.30565e+11	2.30565e+11	1.77517e+10	1.63183e-05	58.746		2950	1301	1679.02	77.9571	0.096581	2.56148e+11
1000	1311	178.954	25.3714	0.0261846	1.56374e+11	1.56374e+11	4.09459e+09	7.25086e-06	26.1031		1500	1311	436.918	39.5571	0.0422957	1.81957e+11	1.81957e+11	7.696e+09	1.06279e-05	38.2604		1950	1311	780.82	48.3429	0.0582883	2.04982e+11	2.04982e+11	1.1948e+10	1.34535e-05	48.4327		2450	1311	1204.54	56.4429	0.0772741	2.30565e+11	2.30565e+11	1.78167e+10	1.6312e-05	58.7233		2950	1311	1680.68	71.1857	0.0969731	2.56148e+11
1000	1321	179.572	26.4857	0.0262361	1.56374e+11	1.56374e+11	4.10265e+09	7.25048e-06	26.1017		1500	1321	437.767	36.3857	0.0424048	1.81957e+11	1.81957e+11	7.71585e+09	1.06266e-05	38.2556		1950	1321	782.035	52.0714	0.0584694	2.04982e+11	2.04982e+11	1.19852e+10	1.34504e-05	48.4216		2450	1321	1205.87	56.9143	0.0775537	2.30565e+11	2.30565e+11	1.78811e+10	1.63058e-05	58.7007		2950	1321	1682.38	72.8571	0.0973629	2.56148e+11
1000	1331	180.165	25.4143	0.0262869	1.56374e+11	1.56374e+11	4.11059e+09	7.25011e-06	26.1004		1500	1331	438.617	36.4286	0.0425126	1.81957e+11	1.81957e+11	7.73547e+09	1.06252e-05	38.2509		1950	1331	783.205	50.1429	0.0586489	2.04982e+11	2.04982e+11	1.2022e+10	1.34474e-05	48.4106		2450	1331	1207.23	58.2	0.0778313	2.30565e+11	2.30565e+11	1.79452e+10	1.62995e-05	58.6784		2950	1331	1684.08	72.9	0.0977505	2.56148e+11
1000	1341	180.751	25.1143	0.0263369	1.56374e+11	1.56374e+11	4.11841e+09	7.24974e-06	26.0991		1500	1341	439.348	31.3286	0.0426192	1.81957e+11	1.81957e+11	7.75486e+09	1.06239e-05	38.2462		1950	1341	784.405	51.4286	0.0588268	2.04982e+11	2.04982e+11	1.20584e+10	1.34444e-05	48.3997		2450	1341	1208.62	59.7429	0.078107	2.30565e+11	2.30565e+11	1.80087e+10	1.62934e-05	58.6562		2950	1341	1685.7	69.6429	0.0981359	2.56148e+11
1000	1351	181.333	24.9429	0.0263861	1.56374e+11	1.56374e+11	4.12611e+09	7.24938e-06	26.0978		1500	1351	440.315	41.4429	0.0427245	1.81957e+11	1.81957e+11	7.77403e+09	1.06226e-05	38.2415		1950	1351	785.609	51.6	0.0590031	2.04982e+11	2.04982e+11	1.20946e+10	1.34414e-05	48.3889		2450	1351	1209.92	55.7571	0.0783808	2.30565e+11	2.30565e+11	1.80718e+10	1.62873e-05	58.6341		2950	1351	1687.29	68.1429	0.0985191	2.56148e+11
1000	1361	191.669	147.657	0.0264346	1.56374e+11	1.56374e+11	4.13368e+09	7.24902e-06	26.0965		1500	1361	441.141	35.4	0.0428286	1.81957e+11	1.81957e+11	7.79297e+09	1.06214e-05	38.2369		1950	1361	786.79	50.6143	0.0591777	2.04982e+11	2.04982e+11	1.21304e+10	1.34384e-05	48.3782		2450	1361	1211.3	58.9286	0.0786526	2.30565e+11	2.30565e+11	1.81345e+10	1.62812e-05	58.6123		2950	1361	1689.06	75.7286	0.0989001	2.56148e+11
1000	1371	192.209	23.1429	0.0264823	1.56374e+11	1.56374e+11	4.14114e+09	7.24867e-06	26.0952		1500	1371	442.004	36.9857	0.0429315	1.81957e+11	1.81957e+11	7.81169e+09	1.06201e-05	38.2324		1950	1371	787.957	50.0143	0.0593508	2.04982e+11	2.04982e+11	1.21658e+10	1.34354e-05	48.3676		2450	1371	1212.67	58.8	0.0789226	2.30565e+11	2.30565e+11	1.81968e+10	1.62752e-05	58.5906		2950	1371	1690.72	71.2714	0.099279	2.56148e+11
1000	1381	193.071	36.9429	0.0265292	1.56374e+11	1.56374e+11	4.14849e+09	7.24833e-06	26.094		1500	1381	442.966	41.2286	0.0430332	1.81957e+11	1.81957e+11	7.83019e+09	1.06189e-05	38.2279		1950	1381	789.131	50.3143	0.0595223	2.04982e+11	2.04982e+11	1.2201e+10	1.34325e-05	48.3571		2450	1381	1214.03	58.2857	0.0791907	2.30565e+11	2.30565e+11	1.82586e+10	1.62692e-05	58.5691		2950	1381	1711.8	301.086	0.0996557	2.56148e+11
1000	1391	193.676	25.9286	0.0265755	1.56374e+11	1.56374e+11	4.15572e+09	7.24799e-06	26.0927		1500	1391	443.815	36.3857	0.0431337	1.81957e+11	1.81957e+11	7.84848e+09	1.06176e-05	38.2235		1950	1391	797.397	118.086	0.0596923	2.04982e+11	2.04982e+11	1.22358e+10	1.34297e-05	48.3467		2450	1391	1215.38	57.6857	0.0794569	2.30565e+11	2.30565e+11	1.832e+10	1.62633e-05	58.5477		2950	1391	1732.22	874.971	0.10003	2.56148e+11
1000	1401	194.167	21.0429	0.026621	1.56374e+11	1.56374e+11	4.16285e+09	7.24765e-06	26.0915		1500	1401	444.763	40.6286	0.043233	1.81957e+11	1.81957e+11	7.86656e+09	1.06164e-05	38.2191		1950	1401	798.349	40.8	0.0598608	2.04982e+11	2.04982e+11	1.22704e+10	1.34268e-05	48.3365		2450	1401	1216.78	60.2571	0.0797213	2.30565e+11	2.30565e+11	1.83809e+10	1.62574e-05	58.5265		2950	1401	1733.62	60.0857	0.100403	2.56148e+11
1000	1411	194.694	22.5857	0.0266659	1.56374e+11	1.56374e+11	4.16986e+09	7.24732e-06	26.0904		1500	1411	445.592	35.5286	0.0433312	1.81957e+11	1.81957e+11	7.88443e+09	1.06152e-05	38.2148		1950	1411	799.259	39	0.0600278	2.04982e+11	2.04982e+11	1.23046e+10	1.3424e-05	48.3263		2450	1411	1218.19	60.2143	0.0799839	2.30565e+11	2.30565e+11	1.84415e+10	1.62515e-05	58.5055		2950	1411	1735.08	62.5714	0.100774	2.56148e+11
1000	1421	195.247	23.7	0.0267101	1.56374e+11	1.56374e+11	4.17676e+09	7.247e-06	26.0892		1500	1421	446.472	37.7143	0.0434283	1.81957e+11	1.81957e+11	7.90209e+09	1.0614e-05	38.2105		1950	1421	800.237	41.9143	0.0601932	2.04982e+11	2.04982e+11	1.23385e+10	1.34212e-05	48.3162		2450	1421	1219.56	58.6714	0.0802447	2.30565e+11	2.30565e+11	1.85016e+10	1.62457e-05	58.4846		2950	1421	1736.54	62.8714	0.101142	2.56148e+11
1000	1431	195.798	23.6143	0.0267535	1.56374e+11	1.56374e+11	4.18356e+09	7.24668e-06	26.088		1500	1431	447.366	38.3143	0.0435243	1.81957e+11	1.81957e+11	7.91955e+09	1.06129e-05	38.2063		1950	1431	801.347	47.5714	0.0603572	2.04982e+11	2.04982e+11	1.23721e+10	1.34184e-05	48.3062		2450	1431	1220.99	61.3714	0.0805037	2.30565e+11	2.30565e+11	1.85613e+10	1.624e-05	58.4639		2950	1431	1738.03	63.7286	0.101509	2.56148e+11
1000	1441	196.356	23.9143	0.0267964	1.56374e+11	1.56374e+11	4.19026e+09	7.24636e-06	26.0869		1500	1441	448.263	38.4429	0.0436191	1.81957e+11	1.81957e+11	7.93681e+09	1.06117e-05	38.2021		1950	1441	802.44	46.8429	0.0605198	2.04982e+11	2.04982e+11	1.24055e+10	1.34156e-05	48.2963		2450	1441	1222.4	60.3	0.080761	2.30565e+11	2.30565e+11	1.86206e+10	1.62343e-05	58.4433		2950	1441	1739.54	64.8429	0.101873	2.56148e+11
1000	1451	196.777	18.0429	0.0268385	1.56374e+11	1.56374e+11	4.19686e+09	7.24605e-06	26.0858		1500	1451	449.125	36.9429	0.0437129	1.81957e+11	1.81957e+11	7.95388e+09	1.06106e-05	38.198		1950	1451	803.537	47.0143	0.0606809	2.04982e+11	2.04982e+11	1.24385e+10	1.34129e-05	48.2864		2450	1451	1218.47	-56.0857	0.0810166	2.30565e+11	2.30565e+11	1.86796e+10	1.62286e-05	58.4229		2950	1451	1741.06	64.7571	0.102236	2.56148e+11
1000	1461	197.221	19.0286	0.0268801	1.56374e+11	1.56374e+11	4.20335e+09	7.24575e-06	26.0847		1500	1461	449.883	32.4857	0.0438056	1.81957e+11	1.81957e+11	7.97074e+09	1.06094e-05	38.1939		1950	1461	804.603	45.6857	0.0608407	2.04982e+11	2.04982e+11	1.24712e+10	1.34102e-05	48.2767		2450	1461	1219.77	55.5857	0.0812704	2.30565e+11	2.30565e+11	1.87381e+10	1.6223e-05	58.4026		2950	1461	1742.58	65.4429	0.102596	2.56148e+11
1000	1471	197.653	18.5143	0.026921	1.56374e+11	1.56374e+11	4.20974e+09	7.24545e-06	26.0836		1500	1471	450.625	31.8	0.0438972	1.81957e+11	1.81957e+11	7.98742e+09	1.06083e-05	38.1899		1950	1471	805.71	47.4429	0.060999	2.04982e+11	2.04982e+11	1.25037e+10	1.34075e-05	48.2671		2450	1471	1221.13	58.3286	0.0815226	2.30565e+11	2.30565e+11	1.87962e+10	1.62174e-05	58.3825		2950	1471	1744.13	66.1714	0.102955	2.56148e+11
1000	1481	198.219	24.2571	0.0269612	1.56374e+11	1.56374e+11	4.21604e+09	7.24515e-06	26.0825		1500	1481	451.449	35.3143	0.0439878	1.81957e+11	1.81957e+11	8.0039e+09	1.06072e-05	38.1859		1950	1481	806.844	48.6	0.0611559	2.04982e+11	2.04982e+11	1.25359e+10	1.34049e-05	48.2575		2450	1481	1222.46	57.0857	0.081773	2.30565e+11	2.30565e+11	1.8854e+10	1.62118e-05	58.3625		2950	1481	1745.63	64.3714	0.103312	2.56148e+11
1000	1491	198.799	24.8571	0.0270009	1.56374e+11	1.56374e+11	4.22224e+09	7.24486e-06	26.0815		1500	1491	452.278	35.5286	0.0440774	1.81957e+11	1.81957e+11	8.0202e+09	1.06061e-05	38.182		1950	1491	807.904	45.4286	0.0613115	2.04982e+11	2.04982e+11	1.25677e+10	1.34022e-05	48.248		2450	1491	1223.74	54.9857	0.0820219	2.30565e+11	2.30565e+11	1.89113e+10	1.62063e-05	58.3427		2950	1491	1747.15	65.2714	0.103666	2.56148e+11
1000	1501	199.287	20.9143	0.0270399	1.56374e+11	1.56374e+11	4.22835e+09	7.24457e-06	26.0805		1500	1501	453.217	40.2429	0.044166	1.81957e+11	1.81957e+11	8.03631e+09	1.0605e-05	38.1781		1950	1501	808.995	46.7571	0.0614657	2.04982e+11	2.04982e+11	1.25993e+10	1.33996e-05	48.2387		2450	1501	1224.88	48.9429	0.082269	2.30565e+11	2.30565e+11	1.89683e+10	1.62008e-05	58.323		2950	1501	1748.71	66.7286	0.104019	2.56148e+11
1000	1511	199.917	27	0.0270784	1.56374e+11	1.56374e+11	4.23436e+09	7.24429e-06	26.0794		1500	1511	454.08	36.9857	0.0442535	1.81957e+11	1.81957e+11	8.05224e+09	1.06039e-05	38.1742		1950	1511	810	43.0714	0.0616186	2.04982e+11	2.04982e+11	1.26307e+10	1.3397e-05	48.2294		2450	1511	1226.27	59.5286	0.0825146	2.30565e+11	2.30565e+11	1.90249e+10	1.61954e-05	58.3035		2950	1511	1750.27	66.9857	0.104371	2.56148e+11
1000	1521	200.517	25.7143	0.0271163	1.56374e+11	1.56374e+11	4.24029e+09	7.24401e-06	26.0784		1500	1521	455.036	40.9714	0.0443401	1.81957e+11	1.81957e+11	8.06799e+09	1.06029e-05	38.1704		1950	1521	811.017	43.5857	0.0617701	2.04982e+11	2.04982e+11	1.26618e+10	1.33945e-05	48.2202		2450	1521	1227.58	56.1857	0.0827585	2.30565e+11	2.30565e+11	1.90812e+10	1.619e-05	58.2841		2950	1521	1751.78	64.8	0.10472	2.56148e+11
1000	1531	201.075	23.9143	0.0271536	1.56374e+11	1.56374e+11	4.24612e+09	7.24374e-06	26.0775		1500	1531	455.928	38.2286	0.0444256	1.81957e+11	1.81957e+11	8.08356e+09	1.06018e-05	38.1666		1950	1531	812.154	48.7286	0.0619204	2.04982e+11	2.04982e+11	1.26926e+10	1.3392e-05	48.211		2450	1531	1228.91	57	0.0830008	2.30565e+11	2.30565e+11	1.91371e+10	1.61847e-05	58.2649		2950	1531	1753.34	66.6	0.105067	2.56148e+11
1000	1541	201.632	23.8714	0.0271903	1.56374e+11	1.56374e+11	4.25186e+09	7.24347e-06	26.0765		1500	1541	456.83	38.6571	0.0445102	1.81957e+11	1.81957e+11	8.09896e+09	1.06008e-05	38.1629		1950	1541	813.254	47.1429	0.0620693	2.04982e+11	2.04982e+11	1.27231e+10	1.33894e-05	48.202		2450	1541	1230.26	57.5143	0.0832416	2.30565e+11	2.30565e+11	1.91926e+10	1.61794e-05	58.2457		2950	1541	1748.15	-74.0857	0.105413	2.56148e+11
1000	1551	202.197	24.2143	0.0272265	1.56374e+11	1.56374e+11	4.25752e+09	7.2432e-06	26.0755		1500	1551	457.768	40.2	0.0445939	1.81957e+11	1.81957e+11	8.11418e+09	1.05998e-05	38.1593		1950	1551	814.337	46.4143	0.062217	2.04982e+11	2.04982e+11	1.27534e+10	1.33869e-05	48.193		2450	1551	1231.68	61.1143	0.0834808	2.30565e+11	2.30565e+11	1.92477e+10	1.61741e-05	58.2268		2950	1551	1749.64	63.7286	0.105757	2.56148e+11
1000	1561	202.765	24.3429	0.0272621	1.56374e+11	1.56374e+11	4.26309e+09	7.24294e-06	26.0746		1500	1561	458.579	34.7571	0.0446766	1.81957e+11	1.81957e+11	8.12923e+09	1.05988e-05	38.1556		1950	1561	815.448	47.6143	0.0623634	2.04982e+11	2.04982e+11	1.27834e+10	1.33845e-05	48.1841		2450	1561	1232.6	39.3	0.0837185	2.30565e+11	2.30565e+11	1.93025e+10	1.61689e-05	58.2079		2950	1561	1751.11	63.0429	0.106099	2.56148e+11
1000	1571	203.375	26.1429	0.0272972	1.56374e+11	1.56374e+11	4.26858e+09	7.24268e-06	26.0737		1500	1571	459.48	38.6143	0.0447584	1.81957e+11	1.81957e+11	8.14411e+09	1.05978e-05	38.152		1950	1571	816.529	46.3286	0.0625086	2.04982e+11	2.04982e+11	1.28131e+10	1.3382e-05	48.1753		2450	1571	1233.93	57.1286	0.0839546	2.30565e+11	2.30565e+11	1.9357e+10	1.61637e-05	58.1892		2950	1571	1752.57	62.4429	0.106439	2.56148e+11
1000	1581	203.845	20.1429	0.0273318	1.56374e+11	1.56374e+11	4.27398e+09	7.24243e-06	26.0727		1500	1581	460.342	36.9429	0.0448393	1.81957e+11	1.81957e+11	8.15883e+09	1.05968e-05	38.1485		1950	1581	817.671	48.9429	0.0626525	2.04982e+11	2.04982e+11	1.28426e+10	1.33796e-05	48.1666		2450	1581	1235.34	60.3	0.0841892	2.30565e+11	2.30565e+11	1.94111e+10	1.61585e-05	58.1706		2950	1581	1754.16	68.3143	0.106778	2.56148e+11
1000	1591	204.407	24.0857	0.0273658	1.56374e+11	1.56374e+11	4.27931e+09	7.24218e-06	26.0718		1500	1591	461.231	38.1	0.0449192	1.81957e+11	1.81957e+11	8.17338e+09	1.05958e-05	38.145		1950	1591	818.824	49.4143	0.0627952	2.04982e+11	2.04982e+11	1.28719e+10	1.33772e-05	48.1579		2450	1591	1236.71	58.6286	0.0844224	2.30565e+11	2.30565e+11	1.94648e+10	1.61534e-05	58.1522		2950	1591	1755.57	60.4714	0.107115	2.56148e+11
1000	1601	204.96	23.7	0.0273993	1.56374e+11	1.56374e+11	4.28455e+09	7.24193e-06	26.071		1500	1601	462.15	39.3857	0.0449983	1.81957e+11	1.81957e+11	8.18776e+09	1.05949e-05	38.1415		1950	1601	819.935	47.6143	0.0629367	2.04982e+11	2.04982e+11	1.29009e+10	1.33748e-05	48.1494		2450	1601	1238.13	60.9429	0.084654	2.30565e+11	2.30565e+11	1.95182e+10	1.61483e-05	58.1339		2950	1601	1757.04	63	0.10745	2.56148e+11
1000	1611	205.557	25.5857	0.0274324	1.56374e+11	1.56374e+11	4.28971e+09	7.24169e-06	26.0701		1500	1611	463.027	37.5857	0.0450765	1.81957e+11	1.81957e+11	8.20199e+09	1.05939e-05	38.1381		1950	1611	821.034	47.1	0.063077	2.04982e+11	2.04982e+11	1.29296e+10	1.33725e-05	48.1409		2450	1611	1239.53	60.2143	0.0848842	2.30565e+11	2.30565e+11	1.95713e+10	1.61432e-05	58.1157		2950	1611	1758.71	71.5286	0.107784	2.56148e+11
1000	1621	206.05	21.1286	0.0274649	1.56374e+11	1.56374e+11	4.2948e+09	7.24145e-06	26.0692		1500	1621	463.915	38.0571	0.0451538	1.81957e+11	1.81957e+11	8.21606e+09	1.0593e-05	38.1347		1950	1621	822.191	49.5857	0.0632162	2.04982e+11	2.04982e+11	1.29582e+10	1.33701e-05	48.1324		2450	1621	1240.9	58.5857	0.0851129	2.30565e+11	2.30565e+11	1.9624e+10	1.61382e-05	58.0976		2950	1621	1760.25	65.8714	0.108116	2.56148e+11
1000	1631	206.647	25.5857	0.0274969	1.56374e+11	1.56374e+11	4.29981e+09	7.24122e-06	26.0684		1500	1631	464.92	43.0714	0.0452303	1.81957e+11	1.81957e+11	8.22997e+09	1.0592e-05	38.1313		1950	1631	823.341	49.2857	0.0633541	2.04982e+11	2.04982e+11	1.29864e+10	1.33678e-05	48.1241		2450	1631	1242.25	57.7714	0.0853402	2.30565e+11	2.30565e+11	1.96764e+10	1.61332e-05	58.0797		2950	1631	1761.38	48.6	0.108446	2.56148e+11
1000	1641	207.172	22.5	0.0275285	1.56374e+11	1.56374e+11	4.30474e+09	7.24099e-06	26.0675		1500	1641	465.831	39.0429	0.0453059	1.81957e+11	1.81957e+11	8.24373e+09	1.05911e-05	38.128		1950	1641	824.457	47.8286	0.0634909	2.04982e+11	2.04982e+11	1.30145e+10	1.33655e-05	48.1158		2450	1641	1243.59	57.4286	0.085566	2.30565e+11	2.30565e+11	1.97285e+10	1.61283e-05	58.0618		2950	1641	1762.9	65.1	0.108775	2.56148e+11
1000	1651	207.723	23.6143	0.0275595	1.56374e+11	1.56374e+11	4.3096e+09	7.24076e-06	26.0667		1500	1651	466.762	39.9	0.0453806	1.81957e+11	1.81957e+11	8.25733e+09	1.05902e-05	38.1247		1950	1651	825.608	49.3286	0.0636266	2.04982e+11	2.04982e+11	1.30423e+10	1.33632e-05	48.1076		2450	1651	1244.95	58.1571	0.0857905	2.30565e+11	2.30565e+11	1.97803e+10	1.61234e-05	58.0441		2950	1651	1764.5	68.6143	0.109101	2.56148e+11
1000	1661	208.334	26.1857	0.0275901	1.56374e+11	1.56374e+11	4.31439e+09	7.24053e-06	26.0659		1500	1661	467.625	36.9857	0.0454546	1.81957e+11	1.81957e+11	8.27078e+09	1.05893e-05	38.1215		1950	1661	826.756	49.2	0.0637611	2.04982e+11	2.04982e+11	1.30699e+10	1.3361e-05	48.0995		2450	1661	1246.38	61.4571	0.0860135	2.30565e+11	2.30565e+11	1.98317e+10	1.61185e-05	58.0266		2950	1661	1766.07	67.1571	0.109427	2.56148e+11
1000	1671	208.967	27.1286	0.0276203	1.56374e+11	1.56374e+11	4.3191e+09	7.24031e-06	26.0651		1500	1671	468.561	40.1143	0.0455277	1.81957e+11	1.81957e+11	8.28409e+09	1.05884e-05	38.1183		1950	1671	827.918	49.8	0.0638945	2.04982e+11	2.04982e+11	1.30972e+10	1.33587e-05	48.0914		2450	1671	1247.82	61.7571	0.0862352	2.30565e+11	2.30565e+11	1.98828e+10	1.61136e-05	58.0091		2950	1671	1767.65	67.9714	0.109751	2.56148e+11
1000	1681	209.515	23.4857	0.02765	1.56374e+11	1.56374e+11	4.32374e+09	7.24009e-06	26.0643		1500	1681	469.499	40.2	0.0456	1.81957e+11	1.81957e+11	8.29725e+09	1.05875e-05	38.1151		1950	1681	829.082	49.8857	0.0640268	2.04982e+11	2.04982e+11	1.31243e+10	1.33565e-05	48.0834		2450	1681	1249.27	62.1429	0.0864555	2.30565e+11	2.30565e+11	1.99336e+10	1.61088e-05	57.9918		2950	1681	1769.22	67.0286	0.110073	2.56148e+11
1000	1691	210.121	25.9714	0.0276792	1.56374e+11	1.56374e+11	4.32832e+09	7.23988e-06	26.0636		1500	1691	470.408	38.9571	0.0456715	1.81957e+11	1.81957e+11	8.31026e+09	1.05867e-05	38.112		1950	1691	830.15	45.7714	0.0641579	2.04982e+11	2.04982e+11	1.31512e+10	1.33543e-05	48.0755		2450	1691	1250.68	60.4286	0.0866744	2.30565e+11	2.30565e+11	1.99841e+10	1.6104e-05	57.9745		2950	1691	1770.75	65.7857	0.110393	2.56148e+11
1000	1701	210.693	24.5143	0.027708	1.56374e+11	1.56374e+11	4.33282e+09	7.23967e-06	26.0628		1500	1701	471.307	38.5286	0.0457422	1.81957e+11	1.81957e+11	8.32313e+09	1.05858e-05	38.1089		1950	1701	828.031	-30.2714	0.0642881	2.04982e+11	2.04982e+11	1.31779e+10	1.33521e-05	48.0676		2450	1701	1252.1	60.6	0.086892	2.30565e+11	2.30565e+11	2.00342e+10	1.60993e-05	57.9574		2950	1701	1772.29	66.0429	0.110713	2.56148e+11
1000	1711	211.26	24.3	0.0277364	1.56374e+11	1.56374e+11	4.33726e+09	7.23946e-06	26.0621		1500	1711	472.214	38.8714	0.0458122	1.81957e+11	1.81957e+11	8.33585e+09	1.0585e-05	38.1058		1950	1711	829.098	45.7286	0.0644171	2.04982e+11	2.04982e+11	1.32043e+10	1.335e-05	48.0598		2450	1711	1253.52	60.9	0.0871083	2.30565e+11	2.30565e+11	2.00841e+10	1.60946e-05	57.9404		2950	1711	1773.85	66.8143	0.11103	2.56148e+11
1000	1721	211.862	25.8	0.0277644	1.56374e+11	1.56374e+11	4.34163e+09	7.23926e-06	26.0613		1500	1721	473.127	39.1286	0.0458814	1.81957e+11	1.81957e+11	8.34844e+09	1.05841e-05	38.1028		1950	1721	830.195	47.0143	0.0645451	2.04982e+11	2.04982e+11	1.32306e+10	1.33478e-05	48.0521		2450	1721	1254.92	60.1286	0.0873232	2.30565e+11	2.30565e+11	2.01337e+10	1.60899e-05	57.9236		2950	1721	1775.39	65.9571	0.111346	2.56148e+11
1000	1731	212.467	25.9286	0.0277919	1.56374e+11	1.56374e+11	4.34594e+09	7.23905e-06	26.0606		1500	1731	474.09	41.2714	0.0459498	1.81957e+11	1.81957e+11	8.36089e+09	1.05833e-05	38.0998		1950	1731	831.331	48.6857	0.064672	2.04982e+11	2.04982e+11	1.32566e+10	1.33457e-05	48.0445		2450	1731	1256.35	61.5	0.0875369	2.30565e+11	2.30565e+11	2.01829e+10	1.60852e-05	57.9068		2950	1731	1777.05	71.1857	0.111661	2.56148e+11
1000	1741	213.078	26.1857	0.027819	1.56374e+11	1.56374e+11	4.35018e+09	7.23885e-06	26.0599		1500	1741	474.988	38.4857	0.0460174	1.81957e+11	1.81957e+11	8.3732e+09	1.05825e-05	38.0968		1950	1741	832.319	42.3429	0.0647978	2.04982e+11	2.04982e+11	1.32824e+10	1.33436e-05	48.0369		2450	1741	1257.79	61.3286	0.0877492	2.30565e+11	2.30565e+11	2.02319e+10	1.60806e-05	57.8902		2950	1741	1778.67	69.3429	0.111974	2.56148e+11
1000	1751	213.688	26.1429	0.0278457	1.56374e+11	1.56374e+11	4.35435e+09	7.23866e-06	26.0592		1500	1751	475.953	41.3571	0.0460844	1.81957e+11	1.81957e+11	8.38538e+09	1.05816e-05	38.0939		1950	1751	833.244	39.6429	0.0649227	2.04982e+11	2.04982e+11	1.3308e+10	1.33415e-05	48.0293		2450	1751	1259.16	58.8429	0.0879602	2.30565e+11	2.30565e+11	2.02805e+10	1.6076e-05	57.8736		2950	1751	1780.3	69.7286	0.112285	2.56148e+11
1000	1761	214.29	25.8	0.027872	1.56374e+11	1.56374e+11	4.35847e+09	7.23847e-06	26.0585		1500	1761	476.847	38.3143	0.0461506	1.81957e+11	1.81957e+11	8.39742e+09	1.05808e-05	38.091		1950	1761	834.481	53.0143	0.0650465	2.04982e+11	2.04982e+11	1.33334e+10	1.33394e-05	48.0219		2450	1761	1260.58	60.9	0.08817	2.30565e+11	2.30565e+11	2.03289e+10	1.60714e-05	57.8572		2950	1761	1781.89	68.2714	0.112595	2.56148e+11
1000	1771	214.843	23.7	0.027898	1.56374e+11	1.56374e+11	4.36252e+09	7.23828e-06	26.0578		1500	1771	481.932	72.6429	0.046216	1.81957e+11	1.81957e+11	8.40934e+09	1.058e-05	38.0882		1950	1771	835.393	39.0857	0.0651693	2.04982e+11	2.04982e+11	1.33585e+10	1.33374e-05	48.0145		2450	1771	1262.03	62.0571	0.0883785	2.30565e+11	2.30565e+11	2.0377e+10	1.60669e-05	57.8408		2950	1771	1783.53	70.3714	0.112904	2.56148e+11
1000	1781	215.458	26.3571	0.0279235	1.56374e+11	1.56374e+11	4.36651e+09	7.23809e-06	26.0571		1500	1781	482.769	35.8714	0.0462808	1.81957e+11	1.81957e+11	8.42112e+09	1.05793e-05	38.0853		1950	1781	836.54	49.1571	0.0652912	2.04982e+11	2.04982e+11	1.33835e+10	1.33353e-05	48.0071		2450	1781	1263.45	60.9857	0.0885858	2.30565e+11	2.30565e+11	2.04248e+10	1.60624e-05	57.8246		2950	1781	1785.13	68.4857	0.113211	2.56148e+11
1000	1791	215.993	22.9286	0.0279486	1.56374e+11	1.56374e+11	4.37045e+09	7.2379e-06	26.0565		1500	1791	483.674	38.7857	0.0463448	1.81957e+11	1.81957e+11	8.43277e+09	1.05785e-05	38.0825		1950	1791	837.786	53.4	0.065412	2.04982e+11	2.04982e+11	1.34083e+10	1.33333e-05	47.9999		2450	1791	1275.49	172.029	0.0887919	2.30565e+11	2.30565e+11	2.04723e+10	1.60579e-05	57.8085		2950	1791	1786.82	72.4286	0.113517	2.56148e+11
1000	1801	216.613	26.5714	0.0279734	1.56374e+11	1.56374e+11	4.37432e+09	7.23772e-06	26.0558		1500	1801	484.34	28.5429	0.0464082	1.81957e+11	1.81957e+11	8.4443e+09	1.05777e-05	38.0798		1950	1801	838.901	47.7857	0.0655318	2.04982e+11	2.04982e+11	1.34328e+10	1.33313e-05	47.9927		2450	1801	1276.81	56.4	0.0889967	2.30565e+11	2.30565e+11	2.05195e+10	1.60535e-05	57.7925		2950	1801	1788.48	71.2286	0.113821	2.56148e+11
1000	1811	217.187	24.6	0.0279978	1.56374e+11	1.56374e+11	4.37814e+09	7.23754e-06	26.0552		1500	1811	485.175	35.7857	0.0464708	1.81957e+11	1.81957e+11	8.4557e+09	1.05769e-05	38.077		1950	1811	839.925	43.8857	0.0656507	2.04982e+11	2.04982e+11	1.34572e+10	1.33293e-05	47.9855		2450	1811	1278.06	53.5714	0.0892003	2.30565e+11	2.30565e+11	2.05664e+10	1.60491e-05	57.7766		2950	1811	1790.11	69.6857	0.114124	2.56148e+11
1000	1821	217.762	24.6429	0.0280219	1.56374e+11	1.56374e+11	4.3819e+09	7.23737e-06	26.0545		1500	1821	486.035	36.8571	0.0465328	1.81957e+11	1.81957e+11	8.46698e+09	1.05762e-05	38.0743		1950	1821	841.162	53.0143	0.0657687	2.04982e+11	2.04982e+11	1.34814e+10	1.33273e-05	47.9784		2450	1821	1279.23	50.1429	0.0894027	2.30565e+11	2.30565e+11	2.06131e+10	1.60447e-05	57.7608		2950	1821	1791.72	69.2143	0.114426	2.56148e+11
1000	1831	218.408	27.6857	0.0280456	1.56374e+11	1.56374e+11	4.3856e+09	7.23719e-06	26.0539		1500	1831	486.972	40.1571	0.0465941	1.81957e+11	1.81957e+11	8.47813e+09	1.05755e-05	38.0716		1950	1831	842.114	40.8	0.0658856	2.04982e+11	2.04982e+11	1.35054e+10	1.33254e-05	47.9714		2450	1831	1280.64	60.4714	0.0896039	2.30565e+11	2.30565e+11	2.06595e+10	1.60403e-05	57.7451		2950	1831	1793.35	69.5143	0.114726	2.56148e+11
1000	1841	219.024	26.4	0.0280689	1.56374e+11	1.56374e+11	4.38925e+09	7.23702e-06	26.0533		1500	1841	487.781	34.6714	0.0466548	1.81957e+11	1.81957e+11	8.48917e+09	1.05747e-05	38.069		1950	1841	842.905	33.9	0.0660017	2.04982e+11	2.04982e+11	1.35291e+10	1.33234e-05	47.9644		2450	1841	1281.89	53.6571	0.0898039	2.30565e+11	2.30565e+11	2.07056e+10	1.6036e-05	57.7295		2950	1841	1806.3	185.043	0.115024	2.56148e+11
1000	1851	219.595	24.4714	0.0280919	1.56374e+11	1.56374e+11	4.39284e+09	7.23685e-06	26.0527		1500	1851	488.591	34.7143	0.0467148	1.81957e+11	1.81957e+11	8.50008e+09	1.0574e-05	38.0663		1950	1851	844.05	49.0714	0.0661168	2.04982e+11	2.04982e+11	1.35527e+10	1.33215e-05	47.9575		2450	1851	1283.15	54.1286	0.0900027	2.30565e+11	2.30565e+11	2.07515e+10	1.60317e-05	57.714		2950	1851	1807.77	63.0429	0.115322	2.56148e+11
1000	1861	220.237	27.5143	0.0281145	1.56374e+11	1.56374e+11	4.39638e+09	7.23669e-06	26.0521		1500	1861	489.414	35.2714	0.0467741	1.81957e+11	1.81957e+11	8.51088e+09	1.05733e-05	38.0638		1950	1861	845.224	50.3143	0.066231	2.04982e+11	2.04982e+11	1.35761e+10	1.33196e-05	47.9506		2450	1861	1284.42	54.4286	0.0902004	2.30565e+11	2.30565e+11	2.0797e+10	1.60274e-05	57.6986		2950	1861	1809.21	61.8429	0.115618	2.56148e+11
1000	1871	220.767	22.7143	0.0281368	1.56374e+11	1.56374e+11	4.39987e+09	7.23652e-06	26.0515		1500	1871	490.31	38.4	0.0468328	1.81957e+11	1.81957e+11	8.52156e+09	1.05726e-05	38.0612		1950	1871	846.363	48.8143	0.0663443	2.04982e+11	2.04982e+11	1.35994e+10	1.33177e-05	47.9438		2450	1871	1285.69	54.2571	0.0903969	2.30565e+11	2.30565e+11	2.08423e+10	1.60231e-05	57.6833		2950	1871	1810.64	61.2857	0.115912	2.56148e+11
1000	1881	221.353	25.1143	0.0281588	1.56374e+11	1.56374e+11	4.40331e+09	7.23636e-06	26.0509		1500	1881	491.09	33.4286	0.0468909	1.81957e+11	1.81957e+11	8.53213e+09	1.05718e-05	38.0587		1950	1881	847.554	51.0429	0.0664566	2.04982e+11	2.04982e+11	1.36224e+10	1.33158e-05	47.9371		2450	1881	1286.98	55.4143	0.0905923	2.30565e+11	2.30565e+11	2.08874e+10	1.60189e-05	57.6681		2950	1881	1812.05	60.2143	0.116206	2.56148e+11
1000	1891	221.385	0.457143	0.0281804	1.56374e+11	1.56374e+11	4.40669e+09	7.2362e-06	26.0503		1500	1891	491.788	29.9143	0.0469483	1.81957e+11	1.81957e+11	8.54258e+09	1.05712e-05	38.0561		1950	1891	848.699	49.0714	0.0665681	2.04982e+11	2.04982e+11	1.36453e+10	1.3314e-05	47.9304		2450	1891	1288.26	54.8571	0.0907866	2.30565e+11	2.30565e+11	2.09322e+10	1.60147e-05	57.653		2950	1891	1813.49	61.8	0.116498	2.56148e+11
1000	1901	222.01	26.7857	0.0282017	1.56374e+11	1.56374e+11	4.41003e+09	7.23605e-06	26.0498		1500	1901	492.435	27.7286	0.0470051	1.81957e+11	1.81957e+11	8.55292e+09	1.05705e-05	38.0537		1950	1901	849.809	47.5714	0.0666787	2.04982e+11	2.04982e+11	1.36679e+10	1.33121e-05	47.9237		2450	1901	1289.62	58.0286	0.0909797	2.30565e+11	2.30565e+11	2.09767e+10	1.60105e-05	57.638		2950	1901	1814.93	61.7143	0.116789	2.56148e+11
1000	1911	222.567	23.8714	0.0282228	1.56374e+11	1.56374e+11	4.41331e+09	7.23589e-06	26.0492		1500	1911	493.298	36.9857	0.0470613	1.81957e+11	1.81957e+11	8.56314e+09	1.05698e-05	38.0512		1950	1911	850.946	48.7286	0.0667884	2.04982e+11	2.04982e+11	1.36904e+10	1.33103e-05	47.9171		2450	1911	1290.92	55.7571	0.0911717	2.30565e+11	2.30565e+11	2.1021e+10	1.60064e-05	57.623		2950	1911	1816.45	65.1	0.117078	2.56148e+11
1000	1921	223.218	27.9	0.0282435	1.56374e+11	1.56374e+11	4.41655e+09	7.23574e-06	26.0487		1500	1921	494.145	36.3	0.0471169	1.81957e+11	1.81957e+11	8.57326e+09	1.05691e-05	38.0488		1950	1921	852.056	47.5714	0.0668973	2.04982e+11	2.04982e+11	1.37127e+10	1.33085e-05	47.9106		2450	1921	1292.26	57.3857	0.0913627	2.30565e+11	2.30565e+11	2.1065e+10	1.60023e-05	57.6082		2950	1921	1817.96	64.6714	0.117366	2.56148e+11
1000	1931	223.775	23.8714	0.0282638	1.56374e+11	1.56374e+11	4.41974e+09	7.23559e-06	26.0481		1500	1931	494.983	35.9143	0.0471719	1.81957e+11	1.81957e+11	8.58327e+09	1.05684e-05	38.0464		1950	1931	853.158	47.2286	0.0670053	2.04982e+11	2.04982e+11	1.37349e+10	1.33067e-05	47.9041		2450	1931	1293.59	57	0.0915525	2.30565e+11	2.30565e+11	2.11088e+10	1.59982e-05	57.5935		2950	1931	1819.43	63.0429	0.117653	2.56148e+11
1000	1941	224.38	25.9286	0.0282839	1.56374e+11	1.56374e+11	4.42288e+09	7.23545e-06	26.0476		1500	1941	495.87	38.0143	0.0472264	1.81957e+11	1.81957e+11	8.59317e+09	1.05678e-05	38.044		1950	1941	854.273	47.7857	0.0671124	2.04982e+11	2.04982e+11	1.37568e+10	1.33049e-05	47.8977		2450	1941	1294.96	58.7571	0.0917412	2.30565e+11	2.30565e+11	2.11523e+10	1.59941e-05	57.5788		2950	1941	1820.97	66	0.117939	2.56148e+11
1000	1951	224.992	26.2286	0.0283037	1.56374e+11	1.56374e+11	4.42597e+09	7.2353e-06	26.0471		1500	1951	496.699	35.5286	0.0472802	1.81957e+11	1.81957e+11	8.60297e+09	1.05671e-05	38.0417		1950	1951	855.434	49.7571	0.0672187	2.04982e+11	2.04982e+11	1.37786e+10	1.33031e-05	47.8913		2450	1951	1296.29	56.8714	0.0919289	2.30565e+11	2.30565e+11	2.11956e+10	1.59901e-05	57.5643		2950	1951	1822.5	65.5286	0.118223	2.56148e+11
1000	1961	225.431	18.8143	0.0283232	1.56374e+11	1.56374e+11	4.42902e+09	7.23516e-06	26.0466		1500	1961	497.587	38.0571	0.0473335	1.81957e+11	1.81957e+11	8.61266e+09	1.05665e-05	38.0393		1950	1961	856.591	49.5857	0.0673242	2.04982e+11	2.04982e+11	1.38002e+10	1.33014e-05	47.885		2450	1961	1297.62	57.2143	0.0921155	2.30565e+11	2.30565e+11	2.12386e+10	1.59861e-05	57.5498		2950	1961	1823.99	63.9	0.118506	2.56148e+11
1000	1971	226.075	27.6	0.0283424	1.56374e+11	1.56374e+11	4.43202e+09	7.23502e-06	26.0461		1500	1971	498.443	36.6857	0.0473861	1.81957e+11	1.81957e+11	8.62225e+09	1.05658e-05	38.037		1950	1971	857.742	49.3286	0.0674288	2.04982e+11	2.04982e+11	1.38217e+10	1.32996e-05	47.8787		2450	1971	1298.97	58.0286	0.0923011	2.30565e+11	2.30565e+11	2.12814e+10	1.59821e-05	57.5354		2950	1971	1825.57	67.5429	0.118788	2.56148e+11
1000	1981	226.518	18.9857	0.0283613	1.56374e+11	1.56374e+11	4.43498e+09	7.23488e-06	26.0456		1500	1981	499.194	32.1857	0.0474383	1.81957e+11	1.81957e+11	8.63173e+09	1.05652e-05	38.0348		1950	1981	858.919	50.4429	0.0675327	2.04982e+11	2.04982e+11	1.3843e+10	1.32979e-05	47.8725		2450	1981	1300.32	57.7286	0.0924856	2.30565e+11	2.30565e+11	2.13239e+10	1.59781e-05	57.5211		2950	1981	1827.09	65.1857	0.119069	2.56148e+11
1000	1991	227.024	21.6857	0.02838	1.56374e+11	1.56374e+11	4.4379e+09	7.23474e-06	26.0451		1500	1991	500.061	37.1571	0.0474898	1.81957e+11	1.81957e+11	8.64112e+09	1.05646e-05	38.0325		1950	1991	860.108	50.9571	0.0676357	2.04982e+11	2.04982e+11	1.38641e+10	1.32962e-05	47.8663		2450	1991	1301.64	56.4429	0.0926691	2.30565e+11	2.30565e+11	2.13662e+10	1.59742e-05	57.507		2950	1991	1828.61	65.1	0.119348	2.56148e+11
1000	2001	227.509	20.7857	0.0283983	1.56374e+11	1.56374e+11	4.44077e+09	7.23461e-06	26.0446		1500	2001	500.898	35.8714	0.0475409	1.81957e+11	1.81957e+11	8.6504e+09	1.0564e-05	38.0303		1950	2001	861.292	50.7429	0.0677379	2.04982e+11	2.04982e+11	1.3885e+10	1.32945e-05	47.8602		2450	2001	1303.04	59.9571	0.0928515	2.30565e+11	2.30565e+11	2.14083e+10	1.59702e-05	57.4928		2950	2001	1830.13	65.3571	0.119626	2.56148e+11
1000	2011	228.068	23.9571	0.0284164	1.56374e+11	1.56374e+11	4.4436e+09	7.23448e-06	26.0441		1500	2011	501.756	36.7714	0.0475913	1.81957e+11	1.81957e+11	8.65958e+09	1.05634e-05	38.0281		1950	2011	862.411	47.9571	0.0678393	2.04982e+11	2.04982e+11	1.39058e+10	1.32928e-05	47.8542		2450	2011	1304.46	60.9857	0.0930329	2.30565e+11	2.30565e+11	2.14501e+10	1.59663e-05	57.4788		2950	2011	1831.67	65.9143	0.119903	2.56148e+11
1000	2021	228.63	24.0857	0.0284342	1.56374e+11	1.56374e+11	4.44638e+09	7.23435e-06	26.0436		1500	2021	502.602	36.2571	0.0476413	1.81957e+11	1.81957e+11	8.66867e+09	1.05628e-05	38.0259		1950	2021	863.642	52.7571	0.0679399	2.04982e+11	2.04982e+11	1.39264e+10	1.32911e-05	47.8481		2450	2021	1301.16	-47.1714	0.0932133	2.30565e+11	2.30565e+11	2.14917e+10	1.59625e-05	57.4649		2950	2021	1833.22	66.6	0.120179	2.56148e+11
1000	2031	229.243	26.2714	0.0284518	1.56374e+11	1.56374e+11	4.44913e+09	7.23422e-06	26.0432		1500	2031	503.45	36.3429	0.0476907	1.81957e+11	1.81957e+11	8.67766e+09	1.05622e-05	38.0237		1950	2031	864.764	48.0857	0.0680398	2.04982e+11	2.04982e+11	1.39469e+10	1.32895e-05	47.8422		2450	2031	1302.38	52.5	0.0933927	2.30565e+11	2.30565e+11	2.15331e+10	1.59586e-05	57.451		2950	2031	1834.8	67.7571	0.120454	2.56148e+11
1000	2041	229.861	26.4857	0.0284691	1.56374e+11	1.56374e+11	4.45183e+09	7.23409e-06	26.0427		1500	2041	504.313	36.9857	0.0477396	1.81957e+11	1.81957e+11	8.68656e+09	1.05616e-05	38.0216		1950	2041	866.007	53.2714	0.0681389	2.04982e+11	2.04982e+11	1.39672e+10	1.32878e-05	47.8362		2450	2041	1303.69	55.8857	0.0935711	2.30565e+11	2.30565e+11	2.15742e+10	1.59548e-05	57.4372		2950	2041	1829.71	-72.7	0.120727	2.56148e+11
1000	2051	230.405	23.3143	0.0284862	1.56374e+11	1.56374e+11	4.4545e+09	7.23396e-06	26.0423		1500	2051	505.244	39.9	0.0477879	1.81957e+11	1.81957e+11	8.69536e+09	1.0561e-05	38.0195		1950	2051	867.099	46.8	0.0682372	2.04982e+11	2.04982e+11	1.39874e+10	1.32862e-05	47.8304		2450	2051	1304.91	52.5	0.0937485	2.30565e+11	2.30565e+11	2.16151e+10	1.5951e-05	57.4235		2950	2051	1831.26	66.1714	0.120999	2.56148e+11
1000	2061	230.946	23.1857	0.028503	1.56374e+11	1.56374e+11	4.45713e+09	7.23384e-06	26.0418		1500	2061	506.041	34.1571	0.0478358	1.81957e+11	1.81957e+11	8.70406e+09	1.05604e-05	38.0174		1950	2061	868.302	51.5571	0.0683347	2.04982e+11	2.04982e+11	1.40074e+10	1.32846e-05	47.8245		2450	2061	1306.21	55.7571	0.093925	2.30565e+11	2.30565e+11	2.16558e+10	1.59472e-05	57.4099		2950	2061	1832.62	58.2	0.121271	2.56148e+11
1000	2071	231.513	24.3	0.0285195	1.56374e+11	1.56374e+11	4.45971e+09	7.23372e-06	26.0414		1500	2071	506.91	37.2429	0.0478831	1.81957e+11	1.81957e+11	8.71268e+09	1.05598e-05	38.0154		1950	2071	869.42	47.9143	0.0684315	2.04982e+11	2.04982e+11	1.40272e+10	1.3283e-05	47.8187		2450	2071	1307.55	57.2143	0.0941004	2.30565e+11	2.30565e+11	2.16962e+10	1.59434e-05	57.3964		2950	2071	1834.12	64.5429	0.121541	2.56148e+11
1000	2081	232.01	21.3	0.0285358	1.56374e+11	1.56374e+11	4.46226e+09	7.2336e-06	26.041		1500	2081	507.822	39.0857	0.04793	1.81957e+11	1.81957e+11	8.7212e+09	1.05593e-05	38.0133		1950	2081	870.58	49.7143	0.0685276	2.04982e+11	2.04982e+11	1.40469e+10	1.32814e-05	47.813		2450	2081	1308.85	55.8857	0.0942749	2.30565e+11	2.30565e+11	2.17365e+10	1.59397e-05	57.383		2950	2081	1835.58	62.2286	0.121809	2.56148e+11
1000	2091	232.525	22.0714	0.0285519	1.56374e+11	1.56374e+11	4.46477e+09	7.23348e-06	26.0405		1500	2091	508.734	39.0857	0.0479763	1.81957e+11	1.81957e+11	8.72964e+09	1.05587e-05	38.0113		1950	2091	878.491	113.014	0.0686229	2.04982e+11	2.04982e+11	1.40664e+10	1.32798e-05	47.8073		2450	2091	1310.22	58.4143	0.0944485	2.30565e+11	2.30565e+11	2.17765e+10	1.5936e-05	57.3696		2950	2091	1837.1	65.2286	0.122077	2.56148e+11
1000	2101	233.12	25.5	0.0285677	1.56374e+11	1.56374e+11	4.46725e+09	7.23337e-06	26.0401		1500	2101	509.611	37.5857	0.0480222	1.81957e+11	1.81957e+11	8.73798e+09	1.05581e-05	38.0093		1950	2101	879.337	36.2571	0.0687175	2.04982e+11	2.04982e+11	1.40858e+10	1.32782e-05	47.8017		2450	2101	1311.56	57.5571	0.0946211	2.30565e+11	2.30565e+11	2.18163e+10	1.59323e-05	57.3563		2950	2101	1838.46	58.6286	0.122344	2.56148e+11
1000	2111	233.7	24.8571	0.0285833	1.56374e+11	1.56374e+11	4.46969e+09	7.23325e-06	26.0397		1500	2111	510.503	38.2286	0.0480676	1.81957e+11	1.81957e+11	8.74624e+09	1.05576e-05	38.0073		1950	2111	880.588	53.6143	0.0688114	2.04982e+11	2.04982e+11	1.41051e+10	1.32767e-05	47.7961		2450	2111	1312.81	53.4429	0.0947927	2.30565e+11	2.30565e+11	2.18559e+10	1.59286e-05	57.3431		2950	2111	1840.11	70.4571	0.122609	2.56148e+11
1000	2121	234.346	27.6857	0.0285986	1.56374e+11	1.56374e+11	4.47209e+09	7.23314e-06	26.0393		1500	2121	511.341	35.9143	0.0481125	1.81957e+11	1.81957e+11	8.75441e+09	1.0557e-05	38.0054		1950	2121	881.618	44.1429	0.0689045	2.04982e+11	2.04982e+11	1.41242e+10	1.32751e-05	47.7905		2450	2121	1314.09	54.9857	0.0949634	2.30565e+11	2.30565e+11	2.18952e+10	1.5925e-05	57.33		2950	2121	1841.63	65.3143	0.122874	2.56148e+11
1000	2131	234.901	23.7857	0.0286138	1.56374e+11	1.56374e+11	4.47445e+09	7.23303e-06	26.0389		1500	2131	512.243	38.6571	0.0481569	1.81957e+11	1.81957e+11	8.76249e+09	1.05565e-05	38.0034		1950	2131	882.703	46.5	0.0689969	2.04982e+11	2.04982e+11	1.41431e+10	1.32736e-05	47.785		2450	2131	1315.08	42.3	0.0951332	2.30565e+11	2.30565e+11	2.19344e+10	1.59214e-05	57.3169		2950	2131	1842.63	42.7714	0.123137	2.56148e+11
1000	2141	235.471	24.4286	0.0286287	1.56374e+11	1.56374e+11	4.47679e+09	7.23292e-06	26.0385		1500	2141	513.118	37.5	0.0482009	1.81957e+11	1.81957e+11	8.77049e+09	1.0556e-05	38.0015		1950	2141	883.595	38.2286	0.0690887	2.04982e+11	2.04982e+11	1.41619e+10	1.32721e-05	47.7795		2450	2141	1316.41	57.0429	0.0953021	2.30565e+11	2.30565e+11	2.19733e+10	1.59178e-05	57.3039		2950	2141	1844.14	64.7143	0.123399	2.56148e+11
1000	2151	236.103	27.0857	0.0286434	1.56374e+11	1.56374e+11	4.47908e+09	7.23281e-06	26.0381		1500	2151	514.018	38.5714	0.0482444	1.81957e+11	1.81957e+11	8.77841e+09	1.05555e-05	37.9996		1950	2151	884.389	34.0286	0.0691797	2.04982e+11	2.04982e+11	1.41806e+10	1.32706e-05	47.7741		2450	2151	1317.73	56.9143	0.0954701	2.30565e+11	2.30565e+11	2.2012e+10	1.59142e-05	57.291		2950	2151	1845.74	68.5286	0.12366	2.56148e+11
1000	2161	236.739	27.2571	0.0286578	1.56374e+11	1.56374e+11	4.48135e+09	7.23271e-06	26.0377		1500	2161	514.857	35.9571	0.0482874	1.81957e+11	1.81957e+11	8.78624e+09	1.05549e-05	37.9977		1950	2161	885.492	47.2714	0.0692701	2.04982e+11	2.04982e+11	1.41991e+10	1.32691e-05	47.7687		2450	2161	1319.12	59.3571	0.0956371	2.30565e+11	2.30565e+11	2.20506e+10	1.59106e-05	57.2782		2950	2161	1847.19	62.2286	0.12392	2.56148e+11
1000	2171	237.307	24.3429	0.0286721	1.56374e+11	1.56374e+11	4.48358e+09	7.2326e-06	26.0374		1500	2171	515.765	38.9143	0.04833	1.81957e+11	1.81957e+11	8.79398e+09	1.05544e-05	37.9959		1950	2171	886.515	43.8429	0.0693597	2.04982e+11	2.04982e+11	1.42175e+10	1.32676e-05	47.7633		2450	2171	1320.49	58.5857	0.0958033	2.30565e+11	2.30565e+11	2.20889e+10	1.59071e-05	57.2655		2950	2171	1848.81	69.1714	0.124179	2.56148e+11
1000	2181	237.932	26.7857	0.0286862	1.56374e+11	1.56374e+11	4.48577e+09	7.2325e-06	26.037		1500	2181	516.65	37.9286	0.0483721	1.81957e+11	1.81957e+11	8.80165e+09	1.05539e-05	37.9941		1950	2181	887.61	46.9286	0.0694487	2.04982e+11	2.04982e+11	1.42357e+10	1.32661e-05	47.758		2450	2181	1321.83	57.6429	0.0959686	2.30565e+11	2.30565e+11	2.2127e+10	1.59036e-05	57.2528		2950	2181	1850.35	66.2571	0.124437	2.56148e+11
1000	2191	238.544	26.2286	0.0287	1.56374e+11	1.56374e+11	4.48794e+09	7.2324e-06	26.0366		1500	2191	517.52	37.2857	0.0484138	1.81957e+11	1.81957e+11	8.80924e+09	1.05534e-05	37.9922		1950	2191	888.676	45.6857	0.069537	2.04982e+11	2.04982e+11	1.42538e+10	1.32647e-05	47.7528		2450	2191	1323.16	57.0429	0.096133	2.30565e+11	2.30565e+11	2.21649e+10	1.59001e-05	57.2402		2950	2191	1851.78	61.3714	0.124694	2.56148e+11
1000	2201	239.161	26.4429	0.0287136	1.56374e+11	1.56374e+11	4.49007e+09	7.2323e-06	26.0363		1500	2201	516.802	-10.2571	0.0484551	1.81957e+11	1.81957e+11	8.81675e+09	1.05529e-05	37.9904		1950	2201	889.769	46.8429	0.0696247	2.04982e+11	2.04982e+11	1.42718e+10	1.32632e-05	47.7475		2450	2201	1324.48	56.6143	0.0962965	2.30565e+11	2.30565e+11	2.22026e+10	1.58966e-05	57.2277		2950	2201	1853.34	66.9	0.12495	2.56148e+11
1000	2211	239.743	24.9429	0.0287271	1.56374e+11	1.56374e+11	4.49217e+09	7.2322e-06	26.0359		1500	2211	517.587	33.6429	0.0484959	1.81957e+11	1.81957e+11	8.82418e+09	1.05524e-05	37.9887		1950	2211	890.835	45.6857	0.0697117	2.04982e+11	2.04982e+11	1.42896e+10	1.32618e-05	47.7424		2450	2211	1325.76	54.5571	0.0964591	2.30565e+11	2.30565e+11	2.22401e+10	1.58931e-05	57.2152		2950	2211	1854.84	63.9429	0.125205	2.56148e+11
1000	2221	240.372	26.9571	0.0287403	1.56374e+11	1.56374e+11	4.49425e+09	7.2321e-06	26.0356		1500	2221	518.483	38.4	0.0485363	1.81957e+11	1.81957e+11	8.83153e+09	1.05519e-05	37.9869		1950	2221	891.878	44.7	0.069798	2.04982e+11	2.04982e+11	1.43073e+10	1.32603e-05	47.7372		2450	2221	1327.12	58.6286	0.0966209	2.30565e+11	2.30565e+11	2.22774e+10	1.58897e-05	57.2028		2950	2221	1856.36	65.2714	0.125459	2.56148e+11
1000	2231	241.035	28.4143	0.0287534	1.56374e+11	1.56374e+11	4.49629e+09	7.23201e-06	26.0352		1500	2231	519.418	40.0714	0.0485763	1.81957e+11	1.81957e+11	8.8388e+09	1.05514e-05	37.9852		1950	2231	892.921	44.7	0.0698837	2.04982e+11	2.04982e+11	1.43249e+10	1.32589e-05	47.7321		2450	2231	1328.51	59.2286	0.0967818	2.30565e+11	2.30565e+11	2.23145e+10	1.58862e-05	57.1905		2950	2231	1857.98	69.4714	0.125711	2.56148e+11
1000	2241	241.645	26.1429	0.0287662	1.56374e+11	1.56374e+11	4.4983e+09	7.23191e-06	26.0349		1500	2241	520.258	36	0.0486158	1.81957e+11	1.81957e+11	8.846e+09	1.0551e-05	37.9835		1950	2241	893.985	45.6	0.0699687	2.04982e+11	2.04982e+11	1.43423e+10	1.32575e-05	47.7271		2450	2241	1329.92	60.5143	0.0969419	2.30565e+11	2.30565e+11	2.23514e+10	1.58828e-05	57.1782		2950	2241	1859.5	65.1429	0.125963	2.56148e+11
1000	2251	242.221	24.6857	0.0287789	1.56374e+11	1.56374e+11	4.50028e+09	7.23182e-06	26.0346		1500	2251	521.155	38.4429	0.048655	1.81957e+11	1.81957e+11	8.85312e+09	1.05505e-05	37.9817		1950	2251	895.066	46.3286	0.0700531	2.04982e+11	2.04982e+11	1.43596e+10	1.32561e-05	47.722		2450	2251	1331.31	59.4857	0.0971011	2.30565e+11	2.30565e+11	2.23881e+10	1.58795e-05	57.1661		2950	2251	1861.09	68.1429	0.126214	2.56148e+11
1000	2261	242.773	23.6571	0.0287914	1.56374e+11	1.56374e+11	4.50223e+09	7.23173e-06	26.0342		1500	2261	521.836	29.1857	0.0486937	1.81957e+11	1.81957e+11	8.86017e+09	1.055e-05	37.9801		1950	2261	896.174	47.4857	0.0701369	2.04982e+11	2.04982e+11	1.43768e+10	1.32547e-05	47.717		2450	2261	1332.67	58.3286	0.0972595	2.30565e+11	2.30565e+11	2.24246e+10	1.58761e-05	57.154		2950	2261	1862.68	68.3143	0.126463	2.56148e+11
1000	2271	243.403	27	0.0288037	1.56374e+11	1.56374e+11	4.50415e+09	7.23164e-06	26.0339		1500	2271	522.703	37.1571	0.0487321	1.81957e+11	1.81957e+11	8.86715e+09	1.05496e-05	37.9784		1950	2271	897.227	45.1286	0.0702201	2.04982e+11	2.04982e+11	1.43938e+10	1.32534e-05	47.7121		2450	2271	1334.08	60.7286	0.0974171	2.30565e+11	2.30565e+11	2.24609e+10	1.58728e-05	57.1419		2950	2271	1864.29	68.6571	0.126712	2.56148e+11
1000	2281	244.007	25.8857	0.0288158	1.56374e+11	1.56374e+11	4.50605e+09	7.23155e-06	26.0336		1500	2281	523.501	34.2	0.04877	1.81957e+11	1.81957e+11	8.87405e+09	1.05491e-05	37.9767		1950	2281	898.312	46.5	0.0703026	2.04982e+11	2.04982e+11	1.44108e+10	1.3252e-05	47.7072		2450	2281	1335.51	60.9429	0.0975738	2.30565e+11	2.30565e+11	2.24971e+10	1.58694e-05	57.1299		2950	2281	1865.87	68.0143	0.12696	2.56148e+11
1000	2291	244.53	22.4143	0.0288277	1.56374e+11	1.56374e+11	4.50791e+09	7.23146e-06	26.0333		1500	2291	524.231	31.2857	0.0488075	1.81957e+11	1.81957e+11	8.88088e+09	1.05486e-05	37.9751		1950	2291	899.378	45.6857	0.0703845	2.04982e+11	2.04982e+11	1.44275e+10	1.32506e-05	47.7023		2450	2291	1336.89	59.1429	0.0977297	2.30565e+11	2.30565e+11	2.2533e+10	1.58661e-05	57.118		2950	2291	1867.54	71.3571	0.127207	2.56148e+11
1000	2301	245.164	27.1714	0.0288395	1.56374e+11	1.56374e+11	4.50975e+09	7.23138e-06	26.033		1500	2301	525.129	38.4857	0.0488447	1.81957e+11	1.81957e+11	8.88764e+09	1.05482e-05	37.9735		1950	2301	900.55	50.2286	0.0704658	2.04982e+11	2.04982e+11	1.44442e+10	1.32493e-05	47.6975		2450	2301	1338.28	59.7	0.0978848	2.30565e+11	2.30565e+11	2.25688e+10	1.58628e-05	57.1062		2950	2301	1869.09	66.5143	0.127452	2.56148e+11
1000	2311	245.768	25.8857	0.0288511	1.56374e+11	1.56374e+11	4.51157e+09	7.23129e-06	26.0327		1500	2311	525.939	34.7143	0.0488815	1.81957e+11	1.81957e+11	8.89433e+09	1.05477e-05	37.9719		1950	2311	901.647	47.0143	0.0705465	2.04982e+11	2.04982e+11	1.44608e+10	1.3248e-05	47.6927		2450	2311	1339.66	59.1429	0.0980391	2.30565e+11	2.30565e+11	2.26044e+10	1.58596e-05	57.0944		2950	2311	1870.66	67.4571	0.127697	2.56148e+11
1000	2321	246.347	24.8143	0.0288625	1.56374e+11	1.56374e+11	4.51335e+09	7.23121e-06	26.0324		1500	2321	526.955	43.5429	0.0489178	1.81957e+11	1.81957e+11	8.90095e+09	1.05473e-05	37.9703		1950	2321	902.767	48	0.0706266	2.04982e+11	2.04982e+11	1.44772e+10	1.32466e-05	47.6879		2450	2321	1341.06	60.0429	0.0981926	2.30565e+11	2.30565e+11	2.26398e+10	1.58563e-05	57.0827		2950	2321	1872.28	69.3	0.127941	2.56148e+11
1000	2331	246.887	23.1429	0.0288738	1.56374e+11	1.56374e+11	4.51511e+09	7.23113e-06	26.0321		1500	2331	527.809	36.6	0.0489538	1.81957e+11	1.81957e+11	8.9075e+09	1.05469e-05	37.9688		1950	2331	903.87	47.2714	0.0707061	2.04982e+11	2.04982e+11	1.44935e+10	1.32453e-05	47.6832		2450	2331	1342.41	57.9429	0.0983453	2.30565e+11	2.30565e+11	2.2675e+10	1.58531e-05	57.0711		2950	2331	1873.83	66.3429	0.128184	2.56148e+11
1000	2341	247.536	27.8143	0.0288848	1.56374e+11	1.56374e+11	4.51685e+09	7.23105e-06	26.0318		1500	2341	528.646	35.8714	0.0489895	1.81957e+11	1.81957e+11	8.91399e+09	1.05464e-05	37.9672		1950	2341	905.013	48.9857	0.0707851	2.04982e+11	2.04982e+11	1.45096e+10	1.3244e-05	47.6785		2450	2341	1343.78	58.5429	0.0984972	2.30565e+11	2.30565e+11	2.271e+10	1.58499e-05	57.0595		2950	2341	1875.39	66.9429	0.128426	2.56148e+11
1000	2351	248.155	26.5286	0.0288958	1.56374e+11	1.56374e+11	4.51855e+09	7.23097e-06	26.0315		1500	2351	529.61	41.3143	0.0490247	1.81957e+11	1.81957e+11	8.9204e+09	1.0546e-05	37.9657		1950	2351	906.172	49.6714	0.0708634	2.04982e+11	2.04982e+11	1.45257e+10	1.32427e-05	47.6739		2450	2351	1345.21	61.5429	0.0986484	2.30565e+11	2.30565e+11	2.27448e+10	1.58467e-05	57.048		2950	2351	1888.55	187.986	0.128667	2.56148e+11
1000	2361	248.729	24.6	0.0289065	1.56374e+11	1.56374e+11	4.52024e+09	7.23089e-06	26.0312		1500	2361	530.481	37.3286	0.0490596	1.81957e+11	1.81957e+11	8.92675e+09	1.05456e-05	37.9642		1950	2361	907.295	48.1286	0.0709412	2.04982e+11	2.04982e+11	1.45416e+10	1.32415e-05	47.6692		2450	2361	1355.6	148.314	0.0987987	2.30565e+11	2.30565e+11	2.27795e+10	1.58435e-05	57.0366		2950	2361	1890.03	63.3	0.128907	2.56148e+11
1000	2371	249.358	26.9571	0.0289171	1.56374e+11	1.56374e+11	4.5219e+09	7.23081e-06	26.0309		1500	2371	531.227	31.9714	0.0490942	1.81957e+11	1.81957e+11	8.93304e+09	1.05452e-05	37.9627		1950	2371	908.391	46.9714	0.0710184	2.04982e+11	2.04982e+11	1.45575e+10	1.32402e-05	47.6647		2450	2371	1356.9	55.9714	0.0989483	2.30565e+11	2.30565e+11	2.2814e+10	1.58403e-05	57.0252		2950	2371	1891.43	59.9571	0.129146	2.56148e+11
1000	2381	249.995	27.3	0.0289276	1.56374e+11	1.56374e+11	4.52353e+09	7.23073e-06	26.0306		1500	2381	531.992	32.7857	0.0491284	1.81957e+11	1.81957e+11	8.93925e+09	1.05448e-05	37.9612		1950	2381	909.508	47.8714	0.071095	2.04982e+11	2.04982e+11	1.45732e+10	1.32389e-05	47.6601		2450	2381	1358.14	53.0143	0.0990971	2.30565e+11	2.30565e+11	2.28483e+10	1.58372e-05	57.0139		2950	2381	1892.78	58.1571	0.129385	2.56148e+11
1000	2391	250.644	27.8143	0.0289379	1.56374e+11	1.56374e+11	4.52514e+09	7.23066e-06	26.0304		1500	2391	532.698	30.2571	0.0491622	1.81957e+11	1.81957e+11	8.94541e+09	1.05444e-05	37.9597		1950	2391	910.653	49.0714	0.071171	2.04982e+11	2.04982e+11	1.45888e+10	1.32377e-05	47.6556		2450	2391	1359.38	53.2714	0.0992452	2.30565e+11	2.30565e+11	2.28824e+10	1.58341e-05	57.0026		2950	2391	1894.18	59.9571	0.129622	2.56148e+11
1000	2401	251.232	25.2	0.0289481	1.56374e+11	1.56374e+11	4.52673e+09	7.23058e-06	26.0301		1500	2401	533.569	37.3286	0.0491957	1.81957e+11	1.81957e+11	8.9515e+09	1.0544e-05	37.9582		1950	2401	908.62	-29.0429	0.0712465	2.04982e+11	2.04982e+11	1.46042e+10	1.32364e-05	47.6511		2450	2401	1360.65	54.4286	0.0993925	2.30565e+11	2.30565e+11	2.29164e+10	1.58309e-05	56.9914		2950	2401	1895.52	57.2571	0.129858	2.56148e+11
1000	2411	251.842	26.1429	0.0289581	1.56374e+11	1.56374e+11	4.52829e+09	7.23051e-06	26.0298		1500	2411	534.52	40.7571	0.0492288	1.81957e+11	1.81957e+11	8.95753e+09	1.05436e-05	37.9568		1950	2411	909.72	47.1429	0.0713215	2.04982e+11	2.04982e+11	1.46196e+10	1.32352e-05	47.6467		2450	2411	1361.93	54.8571	0.0995391	2.30565e+11	2.30565e+11	2.29502e+10	1.58279e-05	56.9803		2950	2411	1897	63.3429	0.130094	2.56148e+11
1000	2421	252.46	26.4857	0.0289679	1.56374e+11	1.56374e+11	4.52983e+09	7.23044e-06	26.0296		1500	2421	535.402	37.8	0.0492616	1.81957e+11	1.81957e+11	8.96349e+09	1.05432e-05	37.9554		1950	2421	910.739	43.6714	0.0713959	2.04982e+11	2.04982e+11	1.46349e+10	1.3234e-05	47.6423		2450	2421	1363.15	52.0714	0.0996849	2.30565e+11	2.30565e+11	2.29838e+10	1.58248e-05	56.9692		2950	2421	1898.43	61.4143	0.130328	2.56148e+11
1000	2431	253.11	27.8571	0.0289776	1.56374e+11	1.56374e+11	4.53135e+09	7.23037e-06	26.0293		1500	2431	536.274	37.3714	0.049294	1.81957e+11	1.81957e+11	8.9694e+09	1.05428e-05	37.954		1950	2431	911.789	45	0.0714698	2.04982e+11	2.04982e+11	1.465e+10	1.32327e-05	47.6379		2450	2431	1364.39	53.4429	0.09983	2.30565e+11	2.30565e+11	2.30173e+10	1.58217e-05	56.9582		2950	2431	1899.91	63.3857	0.130562	2.56148e+11
1000	2441	253.68	24.4286	0.0289872	1.56374e+11	1.56374e+11	4.53285e+09	7.2303e-06	26.0291		1500	2441	537.207	39.9857	0.0493261	1.81957e+11	1.81957e+11	8.97524e+09	1.05424e-05	37.9526		1950	2441	912.913	48.1714	0.0715431	2.04982e+11	2.04982e+11	1.4665e+10	1.32315e-05	47.6335		2450	2441	1365.63	53.0571	0.0999743	2.30565e+11	2.30565e+11	2.30505e+10	1.58187e-05	56.9472		2950	2441	1901.4	64.0714	0.130795	2.56148e+11
1000	2451	254.307	26.8714	0.0289966	1.56374e+11	1.56374e+11	4.53432e+09	7.23023e-06	26.0288		1500	2451	538.102	38.3571	0.0493579	1.81957e+11	1.81957e+11	8.98103e+09	1.0542e-05	37.9512		1950	2451	914.073	49.7143	0.0716159	2.04982e+11	2.04982e+11	1.46799e+10	1.32303e-05	47.6292		2450	2451	1366.9	54.1286	0.100118	2.30565e+11	2.30565e+11	2.30837e+10	1.58156e-05	56.9363		2950	2451	1902.87	62.8286	0.131027	2.56148e+11
1000	2461	254.98	28.8429	0.0290059	1.56374e+11	1.56374e+11	4.53577e+09	7.23016e-06	26.0286		1500	2461	538.964	36.9429	0.0493894	1.81957e+11	1.81957e+11	8.98675e+09	1.05416e-05	37.9498		1950	2461	915.003	39.8571	0.0716881	2.04982e+11	2.04982e+11	1.46948e+10	1.32291e-05	47.6249		2450	2461	1368.14	53.3571	0.100261	2.30565e+11	2.30565e+11	2.31166e+10	1.58126e-05	56.9255		2950	2461	1904.34	63.1286	0.131258	2.56148e+11
1000	2471	255.567	25.1571	0.0290151	1.56374e+11	1.56374e+11	4.53721e+09	7.23009e-06	26.0283		1500	2471	539.853	38.1	0.0494205	1.81957e+11	1.81957e+11	8.99241e+09	1.05412e-05	37.9485		1950	2471	916.152	49.2429	0.0717598	2.04982e+11	2.04982e+11	1.47095e+10	1.3228e-05	47.6207		2450	2471	1369.48	57.3429	0.100403	2.30565e+11	2.30565e+11	2.31494e+10	1.58096e-05	56.9147		2950	2471	1905.83	63.9429	0.131488	2.56148e+11
1000	2481	256.16	25.4143	0.0290241	1.56374e+11	1.56374e+11	4.53862e+09	7.23003e-06	26.0281		1500	2481	540.653	34.2857	0.0494513	1.81957e+11	1.81957e+11	8.99802e+09	1.05409e-05	37.9471		1950	2481	917.163	43.3286	0.0718311	2.04982e+11	2.04982e+11	1.47241e+10	1.32268e-05	47.6165		2450	2481	1370.78	55.7143	0.100544	2.30565e+11	2.30565e+11	2.3182e+10	1.58067e-05	56.904		2950	2481	1907.32	63.6857	0.131717	2.56148e+11
1000	2491	256.826	28.5429	0.029033	1.56374e+11	1.56374e+11	4.54001e+09	7.22996e-06	26.0279		1500	2491	541.555	38.6571	0.0494818	1.81957e+11	1.81957e+11	9.00357e+09	1.05405e-05	37.9458		1950	2491	918.356	51.1286	0.0719017	2.04982e+11	2.04982e+11	1.47385e+10	1.32256e-05	47.6123		2450	2491	1372.09	56.3571	0.100685	2.30565e+11	2.30565e+11	2.32145e+10	1.58037e-05	56.8933		2950	2491	1908.87	66.2143	0.131946	2.56148e+11
1000	2501	257.416	25.2857	0.0290417	1.56374e+11	1.56374e+11	4.54138e+09	7.2299e-06	26.0276		1500	2501	542.434	37.6714	0.049512	1.81957e+11	1.81957e+11	9.00906e+09	1.05401e-05	37.9445		1950	2501	919.444	46.6286	0.0719719	2.04982e+11	2.04982e+11	1.47529e+10	1.32245e-05	47.6081		2450	2501	1373.36	54.4286	0.100825	2.30565e+11	2.30565e+11	2.32467e+10	1.58008e-05	56.8827		2950	2501	1910.37	64.4571	0.132173	2.56148e+11
1000	2511	258.051	27.2143	0.0290503	1.56374e+11	1.56374e+11	4.54273e+09	7.22984e-06	26.0274		1500	2511	543.29	36.6857	0.0495419	1.81957e+11	1.81957e+11	9.0145e+09	1.05398e-05	37.9432		1950	2511	920.552	47.4857	0.0720416	2.04982e+11	2.04982e+11	1.47672e+10	1.32233e-05	47.604		2450	2511	1374.67	56.0571	0.100965	2.30565e+11	2.30565e+11	2.32789e+10	1.57978e-05	56.8722		2950	2511	1911.86	63.6857	0.1324	2.56148e+11
1000	2521	258.613	24.0857	0.0290589	1.56374e+11	1.56374e+11	4.54405e+09	7.22977e-06	26.0272		1500	2521	544.212	39.5143	0.0495714	1.81957e+11	1.81957e+11	9.01988e+09	1.05394e-05	37.9419		1950	2521	921.307	32.3571	0.0721108	2.04982e+11	2.04982e+11	1.47814e+10	1.32222e-05	47.5999		2450	2521	1375.98	56.1429	0.101103	2.30565e+11	2.30565e+11	2.33108e+10	1.57949e-05	56.8617		2950	2521	1913.35	64.1143	0.132626	2.56148e+11
1000	2531	259.249	27.2571	0.0290672	1.56374e+11	1.56374e+11	4.54537e+09	7.22971e-06	26.027		1500	2531	545.071	36.8143	0.0496007	1.81957e+11	1.81957e+11	9.0252e+09	1.05391e-05	37.9407		1950	2531	922.361	45.1714	0.0721794	2.04982e+11	2.04982e+11	1.47955e+10	1.32211e-05	47.5958		2450	2531	1377.33	57.9	0.101241	2.30565e+11	2.30565e+11	2.33427e+10	1.5792e-05	56.8513		2950	2531	1914.89	66.0429	0.132851	2.56148e+11
1000	2541	259.867	26.4857	0.0290755	1.56374e+11	1.56374e+11	4.54666e+09	7.22965e-06	26.0267		1500	2541	546.012	40.3286	0.0496297	1.81957e+11	1.81957e+11	9.03047e+09	1.05387e-05	37.9394		1950	2541	923.476	47.7857	0.0722476	2.04982e+11	2.04982e+11	1.48094e+10	1.32199e-05	47.5918		2450	2541	1378.68	57.8571	0.101379	2.30565e+11	2.30565e+11	2.33743e+10	1.57891e-05	56.8409		2950	2541	1916.38	63.8571	0.133075	2.56148e+11
1000	2551	260.494	26.8714	0.0290836	1.56374e+11	1.56374e+11	4.54793e+09	7.22959e-06	26.0265		1500	2551	546.887	37.5	0.0496583	1.81957e+11	1.81957e+11	9.03569e+09	1.05384e-05	37.9381		1950	2551	924.549	45.9857	0.0723153	2.04982e+11	2.04982e+11	1.48233e+10	1.32188e-05	47.5878		2450	2551	1380	56.6571	0.101515	2.30565e+11	2.30565e+11	2.34058e+10	1.57863e-05	56.8306		2950	2551	1910.91	-78.1429	0.133299	2.56148e+11
1000	2561	261.092	25.6286	0.0290916	1.56374e+11	1.56374e+11	4.54918e+09	7.22953e-06	26.0263		1500	2561	547.842	40.9286	0.0496867	1.81957e+11	1.81957e+11	9.04085e+09	1.0538e-05	37.9369		1950	2561	925.691	48.9429	0.0723825	2.04982e+11	2.04982e+11	1.48371e+10	1.32177e-05	47.5838		2450	2561	1381.33	56.6571	0.101651	2.30565e+11	2.30565e+11	2.34371e+10	1.57834e-05	56.8203		2950	2561	1912.23	56.5714	0.133521	2.56148e+11
1000	2571	261.67	24.7714	0.0290995	1.56374e+11	1.56374e+11	4.55042e+09	7.22948e-06	26.0261		1500	2571	548.773	39.9	0.0497148	1.81957e+11	1.81957e+11	9.04596e+09	1.05377e-05	37.9357		1950	2571	926.781	46.7143	0.0724492	2.04982e+11	2.04982e+11	1.48508e+10	1.32166e-05	47.5799		2450	2571	1382.66	57.0857	0.101786	2.30565e+11	2.30565e+11	2.34683e+10	1.57806e-05	56.8101		2950	2571	1913.8	67.0714	0.133743	2.56148e+11
1000	2581	263.898	31.8286	0.0291073	1.56374e+11	1.56374e+11	4.55164e+09	7.22942e-06	26.0259		1500	2581	549.664	38.1857	0.0497426	1.81957e+11	1.81957e+11	9.05102e+09	1.05374e-05	37.9345		1950	2581	927.995	52.0286	0.0725154	2.04982e+11	2.04982e+11	1.48643e+10	1.32155e-05	47.5759		2450	2581	1384.05	59.8286	0.101921	2.30565e+11	2.30565e+11	2.34994e+10	1.57778e-05	56.7999		2950	2581	1915.16	58.4143	0.133964	2.56148e+11
1000	2591	264.52	26.6571	0.029115	1.56374e+11	1.56374e+11	4.55283e+09	7.22936e-06	26.0257		1500	2591	550.59	39.6857	0.0497701	1.81957e+11	1.81957e+11	9.05602e+09	1.0537e-05	37.9333		1950	2591	929.114	47.9571	0.0725812	2.04982e+11	2.04982e+11	1.48778e+10	1.32145e-05	47.572		2450	2591	1385.36	55.9714	0.102055	2.30565e+11	2.30565e+11	2.35303e+10	1.57749e-05	56.7898		2950	2591	1916.59	61.4571	0.134184	2.56148e+11
1000	2601	264.991	20.1857	0.0291226	1.56374e+11	1.56374e+11	4.55402e+09	7.22931e-06	26.0255		1500	2601	551.489	38.5286	0.0497973	1.81957e+11	1.81957e+11	9.06098e+09	1.05367e-05	37.9321		1950	2601	930.214	47.1429	0.0726465	2.04982e+11	2.04982e+11	1.48912e+10	1.32134e-05	47.5682		2450	2601	1381.83	-50.4429	0.102188	2.30565e+11	2.30565e+11	2.3561e+10	1.57722e-05	56.7797		2950	2601	1918.15	66.5571	0.134404	2.56148e+11
1000	2611	265.576	25.0714	0.02913	1.56374e+11	1.56374e+11	4.55518e+09	7.22925e-06	26.0253		1500	2611	552.443	40.8857	0.0498243	1.81957e+11	1.81957e+11	9.06588e+09	1.05364e-05	37.9309		1950	2611	931.318	47.3143	0.0727113	2.04982e+11	2.04982e+11	1.49045e+10	1.32123e-05	47.5644		2450	2611	1383.15	56.4429	0.102321	2.30565e+11	2.30565e+11	2.35916e+10	1.57694e-05	56.7697		2950	2611	1919.49	57.7286	0.134622	2.56148e+11
1000	2621	266.059	20.7	0.0291373	1.56374e+11	1.56374e+11	4.55633e+09	7.2292e-06	26.0251		1500	2621	553.321	37.6286	0.0498509	1.81957e+11	1.81957e+11	9.07073e+09	1.05361e-05	37.9298		1950	2621	932.427	47.5286	0.0727757	2.04982e+11	2.04982e+11	1.49177e+10	1.32113e-05	47.5605		2450	2621	1384.38	52.7143	0.102453	2.30565e+11	2.30565e+11	2.3622e+10	1.57666e-05	56.7598		2950	2621	1920.92	61.2857	0.13484	2.56148e+11
1000	2631	266.709	27.8571	0.0291446	1.56374e+11	1.56374e+11	4.55746e+09	7.22915e-06	26.0249		1500	2631	554.197	37.5429	0.0498773	1.81957e+11	1.81957e+11	9.07554e+09	1.05357e-05	37.9286		1950	2631	933.498	45.9	0.0728396	2.04982e+11	2.04982e+11	1.49308e+10	1.32102e-05	47.5568		2450	2631	1385.64	54.1286	0.102584	2.30565e+11	2.30565e+11	2.36523e+10	1.57639e-05	56.7499		2950	2631	1922.5	67.5429	0.135057	2.56148e+11
1000	2641	267.321	26.2286	0.0291517	1.56374e+11	1.56374e+11	4.55858e+09	7.22909e-06	26.0247		1500	2641	555.114	39.3	0.0499035	1.81957e+11	1.81957e+11	9.08029e+09	1.05354e-05	37.9275		1950	2641	934.657	49.6714	0.072903	2.04982e+11	2.04982e+11	1.49438e+10	1.32092e-05	47.553		2450	2641	1386.89	53.5286	0.102715	2.30565e+11	2.30565e+11	2.36824e+10	1.57611e-05	56.74		2950	2641	1923.83	57.0429	0.135273	2.56148e+11
1000	2651	267.802	20.6143	0.0291587	1.56374e+11	1.56374e+11	4.55967e+09	7.22904e-06	26.0246		1500	2651	556.024	39	0.0499293	1.81957e+11	1.81957e+11	9.085e+09	1.05351e-05	37.9264		1950	2651	935.771	47.7429	0.072966	2.04982e+11	2.04982e+11	1.49567e+10	1.32081e-05	47.5493		2450	2651	1388	47.7857	0.102845	2.30565e+11	2.30565e+11	2.37124e+10	1.57584e-05	56.7303		2950	2651	1925.08	53.6571	0.135488	2.56148e+11
1000	2661	268.381	24.8143	0.0291657	1.56374e+11	1.56374e+11	4.56076e+09	7.22899e-06	26.0244		1500	2661	556.92	38.4	0.049955	1.81957e+11	1.81957e+11	9.08966e+09	1.05348e-05	37.9253		1950	2661	936.934	49.8429	0.0730286	2.04982e+11	2.04982e+11	1.49695e+10	1.32071e-05	47.5456		2450	2661	1389.35	57.8143	0.102974	2.30565e+11	2.30565e+11	2.37423e+10	1.57557e-05	56.7205		2950	2661	1926.54	62.4857	0.135703	2.56148e+11
1000	2671	268.939	23.9143	0.0291725	1.56374e+11	1.56374e+11	4.56182e+09	7.22894e-06	26.0242		1500	2671	557.861	40.3286	0.0499803	1.81957e+11	1.81957e+11	9.09427e+09	1.05345e-05	37.9242		1950	2671	938.096	49.8	0.0730907	2.04982e+11	2.04982e+11	1.49823e+10	1.32061e-05	47.5419		2450	2671	1390.49	48.9	0.103103	2.30565e+11	2.30565e+11	2.3772e+10	1.5753e-05	56.7108		2950	2671	1928.04	64.0714	0.135917	2.56148e+11
1000	2681	269.46	22.3286	0.0291792	1.56374e+11	1.56374e+11	4.56287e+09	7.22889e-06	26.024		1500	2681	562.827	70.9429	0.0500054	1.81957e+11	1.81957e+11	9.09884e+09	1.05342e-05	37.9231		1950	2681	939.247	49.3286	0.0731523	2.04982e+11	2.04982e+11	1.49949e+10	1.32051e-05	47.5383		2450	2681	1391.93	61.3714	0.103231	2.30565e+11	2.30565e+11	2.38015e+10	1.57503e-05	56.7012		2950	2681	1929.4	58.3714	0.13613	2.56148e+11
1000	2691	269.913	19.4143	0.0291858	1.56374e+11	1.56374e+11	4.56391e+09	7.22884e-06	26.0238		1500	2691	563.607	33.4286	0.0500302	1.81957e+11	1.81957e+11	9.10335e+09	1.05339e-05	37.922		1950	2691	940.365	47.9143	0.0732135	2.04982e+11	2.04982e+11	1.50074e+10	1.32041e-05	47.5347		2450	2691	1393.17	53.2714	0.103359	2.30565e+11	2.30565e+11	2.38309e+10	1.57477e-05	56.6916		2950	2691	1931.08	72.0429	0.136342	2.56148e+11
1000	2701	270.476	24.1286	0.0291923	1.56374e+11	1.56374e+11	4.56493e+09	7.2288e-06	26.0237		1500	2701	564.498	38.1857	0.0500548	1.81957e+11	1.81957e+11	9.10783e+09	1.05336e-05	37.9209		1950	2701	941.491	48.2571	0.0732743	2.04982e+11	2.04982e+11	1.50199e+10	1.32031e-05	47.5311		2450	2701	1394.49	56.7	0.103486	2.30565e+11	2.30565e+11	2.38602e+10	1.5745e-05	56.682		2950	2701	1932.6	65.0571	0.136554	2.56148e+11
1000	2711	271.02	23.3143	0.0291988	1.56374e+11	1.56374e+11	4.56594e+09	7.22875e-06	26.0235		1500	2711	565.361	36.9857	0.0500791	1.81957e+11	1.81957e+11	9.11225e+09	1.05333e-05	37.9199		1950	2711	942.684	51.1286	0.0733347	2.04982e+11	2.04982e+11	1.50323e+10	1.32021e-05	47.5275		2450	2711	1395.31	35.2286	0.103612	2.30565e+11	2.30565e+11	2.38893e+10	1.57424e-05	56.6725		2950	2711	1934.07	63.0429	0.136765	2.56148e+11
1000	2721	271.53	21.8571	0.0292051	1.56374e+11	1.56374e+11	4.56693e+09	7.2287e-06	26.0233		1500	2721	566.064	30.1286	0.0501032	1.81957e+11	1.81957e+11	9.11664e+09	1.0533e-05	37.9188		1950	2721	943.854	50.1429	0.0733946	2.04982e+11	2.04982e+11	1.50446e+10	1.32011e-05	47.524		2450	2721	1396.68	58.5	0.103738	2.30565e+11	2.30565e+11	2.39183e+10	1.57397e-05	56.6631		2950	2721	1935.51	61.7571	0.136975	2.56148e+11
1000	2731	272.053	22.4143	0.0292114	1.56374e+11	1.56374e+11	4.5679e+09	7.22866e-06	26.0232		1500	2731	566.886	35.2286	0.050127	1.81957e+11	1.81957e+11	9.12097e+09	1.05327e-05	37.9178		1950	2731	944.966	47.6571	0.0734541	2.04982e+11	2.04982e+11	1.50568e+10	1.32001e-05	47.5205		2450	2731	1398.02	57.4286	0.103863	2.30565e+11	2.30565e+11	2.39472e+10	1.57371e-05	56.6537		2950	2731	1937.04	65.7857	0.137184	2.56148e+11
1000	2741	272.496	18.9857	0.0292175	1.56374e+11	1.56374e+11	4.56887e+09	7.22861e-06	26.023		1500	2741	567.695	34.6714	0.0501506	1.81957e+11	1.81957e+11	9.12527e+09	1.05324e-05	37.9168		1950	2741	946.114	49.2	0.0735132	2.04982e+11	2.04982e+11	1.50689e+10	1.31992e-05	47.517		2450	2741	1399.35	57.1286	0.103988	2.30565e+11	2.30565e+11	2.39759e+10	1.57345e-05	56.6443		2950	2741	1938.34	55.5857	0.137393	2.56148e+11
1000	2751	273	21.6	0.0292236	1.56374e+11	1.56374e+11	4.56981e+09	7.22857e-06	26.0228		1500	2751	568.69	42.6429	0.050174	1.81957e+11	1.81957e+11	9.12952e+09	1.05322e-05	37.9158		1950	2751	947.298	50.7429	0.0735719	2.04982e+11	2.04982e+11	1.50809e+10	1.31982e-05	47.5135		2450	2751	1400.67	56.4857	0.104112	2.30565e+11	2.30565e+11	2.40045e+10	1.5732e-05	56.635		2950	2751	1940.09	74.9143	0.137601	2.56148e+11
1000	2761	273.549	23.5286	0.0292296	1.56374e+11	1.56374e+11	4.57075e+09	7.22852e-06	26.0227		1500	2761	569.494	34.4571	0.0501971	1.81957e+11	1.81957e+11	9.13372e+09	1.05319e-05	37.9148		1950	2761	948.459	49.7571	0.0736301	2.04982e+11	2.04982e+11	1.50928e+10	1.31972e-05	47.5101		2450	2761	1402.05	59.1	0.104235	2.30565e+11	2.30565e+11	2.40329e+10	1.57294e-05	56.6258		2950	2761	1941.66	67.4143	0.137808	2.56148e+11
1000	2771	274.079	22.7143	0.0292354	1.56374e+11	1.56374e+11	4.57167e+09	7.22848e-06	26.0225		1500	2771	570.36	37.1143	0.05022	1.81957e+11	1.81957e+11	9.13789e+09	1.05316e-05	37.9138		1950	2771	949.549	46.7143	0.073688	2.04982e+11	2.04982e+11	1.51047e+10	1.31963e-05	47.5067		2450	2771	1403.32	54.5143	0.104358	2.30565e+11	2.30565e+11	2.40612e+10	1.57268e-05	56.6166		2950	2771	1943.19	65.2714	0.138014	2.56148e+11
1000	2781	274.693	26.3143	0.0292413	1.56374e+11	1.56374e+11	4.57258e+09	7.22844e-06	26.0224		1500	2781	571.1	31.7143	0.0502426	1.81957e+11	1.81957e+11	9.14201e+09	1.05313e-05	37.9128		1950	2781	950.751	51.5143	0.0737454	2.04982e+11	2.04982e+11	1.51165e+10	1.31954e-05	47.5033		2450	2781	1404.67	57.8143	0.10448	2.30565e+11	2.30565e+11	2.40894e+10	1.57243e-05	56.6074		2950	2781	1944.75	66.9857	0.13822	2.56148e+11
1000	2791	275.219	22.5429	0.029247	1.56374e+11	1.56374e+11	4.57347e+09	7.2284e-06	26.0222		1500	2791	572.001	38.6143	0.0502651	1.81957e+11	1.81957e+11	9.14609e+09	1.05311e-05	37.9118		1950	2791	956.419	80.9714	0.0738025	2.04982e+11	2.04982e+11	1.51282e+10	1.31944e-05	47.4999		2450	2791	1406.01	57.5143	0.104602	2.30565e+11	2.30565e+11	2.41175e+10	1.57217e-05	56.5983		2950	2791	1946.35	68.6143	0.138425	2.56148e+11
1000	2801	275.798	24.8143	0.0292526	1.56374e+11	1.56374e+11	4.57435e+09	7.22836e-06	26.0221		1500	2801	572.588	25.1571	0.0502873	1.81957e+11	1.81957e+11	9.15013e+09	1.05308e-05	37.9109		1950	2801	957.49	45.9	0.0738591	2.04982e+11	2.04982e+11	1.51398e+10	1.31935e-05	47.4966		2450	2801	1407.29	54.7714	0.104723	2.30565e+11	2.30565e+11	2.41454e+10	1.57192e-05	56.5892		2950	2801	1947.74	59.7857	0.138629	2.56148e+11
1000	2811	276.418	26.5714	0.0292582	1.56374e+11	1.56374e+11	4.57522e+09	7.22832e-06	26.0219		1500	2811	573.265	29.0143	0.0503092	1.81957e+11	1.81957e+11	9.15412e+09	1.05305e-05	37.9099		1950	2811	958.45	41.1429	0.0739154	2.04982e+11	2.04982e+11	1.51513e+10	1.31926e-05	47.4933		2450	2811	1408.63	57.6429	0.104843	2.30565e+11	2.30565e+11	2.41732e+10	1.57167e-05	56.5802		2950	2811	1949.48	74.2286	0.138832	2.56148e+11
1000	2821	276.995	24.7286	0.0292636	1.56374e+11	1.56374e+11	4.57608e+09	7.22828e-06	26.0218		1500	2821	574.114	36.3857	0.050331	1.81957e+11	1.81957e+11	9.15808e+09	1.05303e-05	37.909		1950	2821	959.37	39.4286	0.0739712	2.04982e+11	2.04982e+11	1.51627e+10	1.31917e-05	47.49		2450	2821	1409.97	57.2143	0.104963	2.30565e+11	2.30565e+11	2.42008e+10	1.57142e-05	56.5712		2950	2821	1951.06	67.7571	0.139035	2.56148e+11
1000	2831	277.53	22.9286	0.029269	1.56374e+11	1.56374e+11	4.57692e+09	7.22824e-06	26.0216		1500	2831	574.961	36.3	0.0503525	1.81957e+11	1.81957e+11	9.162e+09	1.053e-05	37.908		1950	2831	960.254	37.8857	0.0740267	2.04982e+11	2.04982e+11	1.51741e+10	1.31908e-05	47.4867		2450	2831	1411.34	58.8429	0.105083	2.30565e+11	2.30565e+11	2.42283e+10	1.57117e-05	56.5623		2950	2831	1952.59	65.7429	0.139237	2.56148e+11
1000	2841	278.154	26.7429	0.0292743	1.56374e+11	1.56374e+11	4.57775e+09	7.2282e-06	26.0215		1500	2841	575.781	35.1429	0.0503738	1.81957e+11	1.81957e+11	9.16588e+09	1.05298e-05	37.9071		1950	2841	961.254	42.8571	0.0740817	2.04982e+11	2.04982e+11	1.51854e+10	1.31899e-05	47.4835		2450	2841	1412.7	58.2	0.105201	2.30565e+11	2.30565e+11	2.42557e+10	1.57093e-05	56.5534		2950	2841	1954.16	67.0286	0.139439	2.56148e+11
1000	2851	278.704	23.5714	0.0292796	1.56374e+11	1.56374e+11	4.57857e+09	7.22816e-06	26.0214		1500	2851	576.673	38.2286	0.0503949	1.81957e+11	1.81957e+11	9.16971e+09	1.05295e-05	37.9062		1950	2851	962.292	44.4857	0.0741364	2.04982e+11	2.04982e+11	1.51966e+10	1.3189e-05	47.4802		2450	2851	1414.1	59.8286	0.10532	2.30565e+11	2.30565e+11	2.4283e+10	1.57068e-05	56.5445		2950	2851	1955.69	65.9143	0.13964	2.56148e+11
1000	2861	279.331	26.8714	0.0292847	1.56374e+11	1.56374e+11	4.57938e+09	7.22812e-06	26.0212		1500	2861	577.531	36.7714	0.0504158	1.81957e+11	1.81957e+11	9.17351e+09	1.05292e-05	37.9053		1950	2861	963.374	46.3714	0.0741907	2.04982e+11	2.04982e+11	1.52077e+10	1.31881e-05	47.477		2450	2861	1415.5	60	0.105437	2.30565e+11	2.30565e+11	2.43101e+10	1.57044e-05	56.5357		2950	2861	1957.21	64.9714	0.13984	2.56148e+11
1000	2871	279.868	23.0143	0.0292898	1.56374e+11	1.56374e+11	4.58017e+09	7.22808e-06	26.0211		1500	2871	578.4	37.2429	0.0504365	1.81957e+11	1.81957e+11	9.17728e+09	1.0529e-05	37.9044		1950	2871	964.437	45.5571	0.0742446	2.04982e+11	2.04982e+11	1.52188e+10	1.31872e-05	47.4739		2450	2871	1416.81	56.1429	0.105554	2.30565e+11	2.30565e+11	2.43371e+10	1.57019e-05	56.527		2950	2871	1969.36	173.543	0.140039	2.56148e+11
1000	2881	280.472	25.8857	0.0292948	1.56374e+11	1.56374e+11	4.58096e+09	7.22805e-06	26.021		1500	2881	579.249	36.3857	0.0504569	1.81957e+11	1.81957e+11	9.181e+09	1.05288e-05	37.9035		1950	2881	965.486	44.9571	0.0742982	2.04982e+11	2.04982e+11	1.52298e+10	1.31863e-05	47.4707		2450	2881	1418.2	59.8286	0.105671	2.30565e+11	2.30565e+11	2.4364e+10	1.56995e-05	56.5183		2950	2881	1970.8	61.7571	0.140238	2.56148e+11
1000	2891	281.07	25.6286	0.0292998	1.56374e+11	1.56374e+11	4.58173e+09	7.22801e-06	26.0208		1500	2891	580.034	33.6429	0.0504772	1.81957e+11	1.81957e+11	9.18468e+09	1.05285e-05	37.9026		1950	2891	966.549	45.5571	0.0743514	2.04982e+11	2.04982e+11	1.52407e+10	1.31854e-05	47.4676		2450	2891	1419.6	59.8286	0.105787	2.30565e+11	2.30565e+11	2.43908e+10	1.56971e-05	56.5096		2950	2891	1972.2	60.0857	0.140436	2.56148e+11
1000	2901	281.685	26.3571	0.0293046	1.56374e+11	1.56374e+11	4.58249e+09	7.22798e-06	26.0207		1500	2901	580.861	35.4429	0.0504972	1.81957e+11	1.81957e+11	9.18833e+09	1.05283e-05	37.9018		1950	2901	967.643	46.8857	0.0744042	2.04982e+11	2.04982e+11	1.52515e+10	1.31846e-05	47.4645		2450	2901	1420.99	59.4857	0.105903	2.30565e+11	2.30565e+11	2.44174e+10	1.56947e-05	56.501		2950	2901	1973.52	56.4	0.140633	2.56148e+11
1000	2911	282.217	22.8	0.0293094	1.56374e+11	1.56374e+11	4.58324e+09	7.22794e-06	26.0206		1500	2911	581.714	36.5571	0.0505171	1.81957e+11	1.81957e+11	9.19194e+09	1.0528e-05	37.9009		1950	2911	968.718	46.0714	0.0744566	2.04982e+11	2.04982e+11	1.52623e+10	1.31837e-05	47.4614		2450	2911	1422.32	57	0.106017	2.30565e+11	2.30565e+11	2.44439e+10	1.56923e-05	56.4924		2950	2911	1974.87	58.1571	0.14083	2.56148e+11
1000	2921	282.785	24.3429	0.0293142	1.56374e+11	1.56374e+11	4.58398e+09	7.22791e-06	26.0205		1500	2921	582.54	35.4	0.0505367	1.81957e+11	1.81957e+11	9.19552e+09	1.05278e-05	37.9001		1950	2921	969.828	47.5714	0.0745087	2.04982e+11	2.04982e+11	1.52729e+10	1.31829e-05	47.4583		2450	2921	1423.68	58.3714	0.106132	2.30565e+11	2.30565e+11	2.44703e+10	1.569e-05	56.4838		2950	2921	1976.29	60.8143	0.141026	2.56148e+11
1000	2931	283.367	24.9429	0.0293188	1.56374e+11	1.56374e+11	4.58471e+09	7.22787e-06	26.0203		1500	2931	583.469	39.8143	0.0505562	1.81957e+11	1.81957e+11	9.19906e+09	1.05276e-05	37.8992		1950	2931	970.924	46.9714	0.0745604	2.04982e+11	2.04982e+11	1.52835e+10	1.3182e-05	47.4553		2450	2931	1425.06	59.0571	0.106246	2.30565e+11	2.30565e+11	2.44965e+10	1.56876e-05	56.4753		2950	2931	1977.68	59.6143	0.141221	2.56148e+11
1000	2941	283.96	25.4143	0.0293234	1.56374e+11	1.56374e+11	4.58543e+09	7.22784e-06	26.0202		1500	2941	584.302	35.7	0.0505754	1.81957e+11	1.81957e+11	9.20256e+09	1.05273e-05	37.8984		1950	2941	971.919	42.6429	0.0746118	2.04982e+11	2.04982e+11	1.52941e+10	1.31812e-05	47.4523		2450	2941	1426.4	57.6	0.106359	2.30565e+11	2.30565e+11	2.45227e+10	1.56852e-05	56.4669		2950	2941	1979.09	60.2143	0.141415	2.56148e+11
1000	2951	284.446	20.8286	0.0293279	1.56374e+11	1.56374e+11	4.58613e+09	7.22781e-06	26.0201		1500	2951	585.098	34.1143	0.0505945	1.81957e+11	1.81957e+11	9.20603e+09	1.05271e-05	37.8976		1950	2951	972.954	44.3571	0.0746628	2.04982e+11	2.04982e+11	1.53045e+10	1.31803e-05	47.4493		2450	2951	1437.33	156.2	0.106472	2.30565e+11	2.30565e+11	2.45487e+10	1.56829e-05	56.4584		2950	2951	1980.54	62.0143	0.141609	2.56148e+11
1000	2961	284.994	23.4857	0.0293324	1.56374e+11	1.56374e+11	4.58683e+09	7.22777e-06	26.02		1500	2961	585.972	37.4571	0.0506134	1.81957e+11	1.81957e+11	9.20947e+09	1.05269e-05	37.8967		1950	2961	973.964	43.2857	0.0747134	2.04982e+11	2.04982e+11	1.53149e+10	1.31795e-05	47.4463		2450	2961	1438.64	55.8429	0.106584	2.30565e+11	2.30565e+11	2.45746e+10	1.56806e-05	56.4501		2950	2961	1981.96	61.1143	0.141803	2.56148e+11
1000	2971	285.568	24.6	0.0293368	1.56374e+11	1.56374e+11	4.58752e+09	7.22774e-06	26.0199		1500	2971	586.859	38.0143	0.0506321	1.81957e+11	1.81957e+11	9.21286e+09	1.05266e-05	37.8959		1950	2971	975.072	47.4857	0.0747637	2.04982e+11	2.04982e+11	1.53252e+10	1.31787e-05	47.4433		2450	2971	1439.83	51.2571	0.106696	2.30565e+11	2.30565e+11	2.46004e+10	1.56783e-05	56.4417		2950	2971	1983.45	63.9429	0.141995	2.56148e+11
1000	2981	286.164	25.5429	0.0293411	1.56374e+11	1.56374e+11	4.5882e+09	7.22771e-06	26.0198		1500	2981	587.759	38.5714	0.0506505	1.81957e+11	1.81957e+11	9.21623e+09	1.05264e-05	37.8951		1950	2981	976.154	46.3714	0.0748137	2.04982e+11	2.04982e+11	1.53354e+10	1.31779e-05	47.4404		2450	2981	1441.03	51.2143	0.106808	2.30565e+11	2.30565e+11	2.46261e+10	1.5676e-05	56.4334		2950	2981	1984.88	60.9429	0.142187	2.56148e+11
1000	2991	286.738	24.6	0.0293454	1.56374e+11	1.56374e+11	4.58886e+09	7.22768e-06	26.0196		1500	2991	588.597	35.9143	0.0506689	1.81957e+11	1.81957e+11	9.21956e+09	1.05262e-05	37.8943		1950	2991	977.287	48.5571	0.0748633	2.04982e+11	2.04982e+11	1.53456e+10	1.31771e-05	47.4375		2450	2991	1442.39	58.4143	0.106918	2.30565e+11	2.30565e+11	2.46516e+10	1.56737e-05	56.4252		2950	2991	1986.35	63.2143	0.142379	2.56148e+11
1000	3001	287.309	24.4714	0.0293496	1.56374e+11	1.56374e+11	4.58952e+09	7.22765e-06	26.0195		1500	3001	589.463	37.1143	0.050687	1.81957e+11	1.81957e+11	9.22286e+09	1.0526e-05	37.8936		1950	3001	978.368	46.3286	0.0749125	2.04982e+11	2.04982e+11	1.53557e+10	1.31763e-05	47.4346		2450	3001	1443.61	52.4143	0.107029	2.30565e+11	2.30565e+11	2.4677e+10	1.56714e-05	56.417		2950	3001	1987.84	63.6429	0.14257	2.56148e+11
1000	3011	287.871	24.0857	0.0293537	1.56374e+11	1.56374e+11	4.59017e+09	7.22762e-06	26.0194		1500	3011	590.32	36.7286	0.0507049	1.81957e+11	1.81957e+11	9.22612e+09	1.05258e-05	37.8928		1950	3011	979.509	48.9	0.0749615	2.04982e+11	2.04982e+11	1.53657e+10	1.31755e-05	47.4317		2450	3011	1444.81	51.4286	0.107138	2.30565e+11	2.30565e+11	2.47024e+10	1.56691e-05	56.4088		2950	3011	1989.32	63.4286	0.14276	2.56148e+11
1000	3021	288.502	27.0429	0.0293578	1.56374e+11	1.56374e+11	4.59081e+09	7.22759e-06	26.0193		1500	3021	591.205	37.9286	0.0507227	1.81957e+11	1.81957e+11	9.22935e+09	1.05256e-05	37.892		1950	3021	980.633	48.1714	0.0750101	2.04982e+11	2.04982e+11	1.53757e+10	1.31747e-05	47.4288		2450	3021	1446.02	51.8571	0.107248	2.30565e+11	2.30565e+11	2.47276e+10	1.56668e-05	56.4007		2950	3021	1990.79	63.3857	0.142949	2.56148e+11
1000	3031	289.035	22.8429	0.0293618	1.56374e+11	1.56374e+11	4.59144e+09	7.22756e-06	26.0192		1500	3031	592.081	37.5429	0.0507403	1.81957e+11	1.81957e+11	9.23255e+09	1.05253e-05	37.8912		1950	3031	981.755	48.0857	0.0750583	2.04982e+11	2.04982e+11	1.53856e+10	1.31739e-05	47.426		2450	3031	1447.23	51.8143	0.107357	2.30565e+11	2.30565e+11	2.47526e+10	1.56646e-05	56.3926		2950	3031	1992.3	64.6286	0.143138	2.56148e+11
1000	3041	289.608	24.5571	0.0293658	1.56374e+11	1.56374e+11	4.59206e+09	7.22753e-06	26.0191		1500	3041	593.005	39.6	0.0507577	1.81957e+11	1.81957e+11	9.23572e+09	1.05251e-05	37.8905		1950	3041	982.836	46.3286	0.0751063	2.04982e+11	2.04982e+11	1.53954e+10	1.31731e-05	47.4232		2450	3041	1448.46	52.7571	0.107465	2.30565e+11	2.30565e+11	2.47776e+10	1.56624e-05	56.3845		2950	3041	1993.78	63.3857	0.143326	2.56148e+11
1000	3051	290.174	24.2571	0.0293697	1.56374e+11	1.56374e+11	4.59267e+09	7.2275e-06	26.019		1500	3051	593.862	36.7286	0.0507749	1.81957e+11	1.81957e+11	9.23885e+09	1.05249e-05	37.8897		1950	3051	983.939	47.2714	0.0751538	2.04982e+11	2.04982e+11	1.54052e+10	1.31723e-05	47.4204		2450	3051	1449.7	53.1429	0.107573	2.30565e+11	2.30565e+11	2.48025e+10	1.56601e-05	56.3765		2950	3051	1995.27	63.6857	0.143514	2.56148e+11
1000	3061	290.759	25.0714	0.0293736	1.56374e+11	1.56374e+11	4.59327e+09	7.22747e-06	26.0189		1500	3061	594.725	36.9857	0.050792	1.81957e+11	1.81957e+11	9.24196e+09	1.05247e-05	37.889		1950	3061	985.025	46.5429	0.0752011	2.04982e+11	2.04982e+11	1.54149e+10	1.31716e-05	47.4176		2450	3061	1451.03	56.8714	0.10768	2.30565e+11	2.30565e+11	2.48272e+10	1.56579e-05	56.3685		2950	3061	1996.78	64.8857	0.143701	2.56148e+11
1000	3071	291.373	26.3143	0.0293774	1.56374e+11	1.56374e+11	4.59386e+09	7.22744e-06	26.0188		1500	3071	595.597	37.3714	0.0508088	1.81957e+11	1.81957e+11	9.24503e+09	1.05245e-05	37.8883		1950	3071	986.128	47.2714	0.0752481	2.04982e+11	2.04982e+11	1.54245e+10	1.31708e-05	47.4148		2450	3071	1452.31	54.6429	0.107787	2.30565e+11	2.30565e+11	2.48519e+10	1.56557e-05	56.3606		2950	3071	1998.3	65.1857	0.143887	2.56148e+11
1000	3081	291.927	23.7429	0.0293811	1.56374e+11	1.56374e+11	4.59445e+09	7.22742e-06	26.0187		1500	3081	596.473	37.5429	0.0508256	1.81957e+11	1.81957e+11	9.24807e+09	1.05243e-05	37.8876		1950	3081	987.316	50.9143	0.0752947	2.04982e+11	2.04982e+11	1.5434e+10	1.317e-05	47.4121		2450	3081	1453.62	56.4	0.107893	2.30565e+11	2.30565e+11	2.48764e+10	1.56535e-05	56.3527		2950	3081	1993.03	-75.3286	0.144073	2.56148e+11
1000	3091	292.541	26.3143	0.0293848	1.56374e+11	1.56374e+11	4.59502e+09	7.22739e-06	26.0186		1500	3091	597.452	41.9571	0.0508421	1.81957e+11	1.81957e+11	9.25108e+09	1.05241e-05	37.8868		1950	3091	988.44	48.1714	0.075341	2.04982e+11	2.04982e+11	1.54435e+10	1.31693e-05	47.4094		2450	3091	1454.93	55.9286	0.107999	2.30565e+11	2.30565e+11	2.49008e+10	1.56513e-05	56.3448		2950	3091	1994.42	59.4	0.144258	2.56148e+11
1000	3101	293.153	26.2286	0.0293884	1.56374e+11	1.56374e+11	4.59559e+09	7.22736e-06	26.0185		1500	3101	598.239	33.7286	0.0508585	1.81957e+11	1.81957e+11	9.25407e+09	1.05239e-05	37.8861		1950	3101	989.519	46.2429	0.075387	2.04982e+11	2.04982e+11	1.5453e+10	1.31685e-05	47.4067		2450	3101	1456.21	54.9857	0.108105	2.30565e+11	2.30565e+11	2.49251e+10	1.56492e-05	56.337		2950	3101	1995.85	61.2857	0.144443	2.56148e+11
1000	3111	293.698	23.3571	0.029392	1.56374e+11	1.56374e+11	4.59615e+09	7.22734e-06	26.0184		1500	3111	597.709	-7.57143	0.0508747	1.81957e+11	1.81957e+11	9.25702e+09	1.05237e-05	37.8854		1950	3111	990.63	47.6143	0.0754327	2.04982e+11	2.04982e+11	1.54623e+10	1.31678e-05	47.404		2450	3111	1457.53	56.7	0.108209	2.30565e+11	2.30565e+11	2.49493e+10	1.5647e-05	56.3292		2950	3111	1997.21	58.6714	0.144626	2.56148e+11
1000	3121	294.291	25.4143	0.0293955	1.56374e+11	1.56374e+11	4.5967e+09	7.22731e-06	26.0183		1500	3121	598.528	35.1	0.0508908	1.81957e+11	1.81957e+11	9.25994e+09	1.05235e-05	37.8847		1950	3121	991.734	47.3143	0.075478	2.04982e+11	2.04982e+11	1.54716e+10	1.3167e-05	47.4013		2450	3121	1458.88	57.5143	0.108314	2.30565e+11	2.30565e+11	2.49734e+10	1.56448e-05	56.3214		2950	3121	1998.65	61.3714	0.14481	2.56148e+11
1000	3131	294.882	25.3286	0.029399	1.56374e+11	1.56374e+11	4.59725e+09	7.22729e-06	26.0182		1500	3131	599.375	36.3	0.0509067	1.81957e+11	1.81957e+11	9.26283e+09	1.05233e-05	37.884		1950	3131	989.77	-28.0571	0.0755231	2.04982e+11	2.04982e+11	1.54809e+10	1.31663e-05	47.3987		2450	3131	1460.23	58.2	0.108418	2.30565e+11	2.30565e+11	2.49973e+10	1.56427e-05	56.3137		2950	3131	2000.08	61.5429	0.144993	2.56148e+11
1000	3141	295.514	27.0857	0.0294024	1.56374e+11	1.56374e+11	4.59778e+09	7.22726e-06	26.0181		1500	3141	600.275	38.5714	0.0509224	1.81957e+11	1.81957e+11	9.2657e+09	1.05232e-05	37.8834		1950	3141	990.796	43.9714	0.0755678	2.04982e+11	2.04982e+11	1.549e+10	1.31656e-05	47.3961		2450	3141	1461.53	55.5429	0.108521	2.30565e+11	2.30565e+11	2.50212e+10	1.56406e-05	56.306		2950	3141	2001.4	56.3143	0.145175	2.56148e+11
1000	3151	296.103	25.2429	0.0294058	1.56374e+11	1.56374e+11	4.59831e+09	7.22724e-06	26.018		1500	3151	601.086	34.7571	0.050938	1.81957e+11	1.81957e+11	9.26853e+09	1.0523e-05	37.8827		1950	3151	991.933	48.7286	0.0756123	2.04982e+11	2.04982e+11	1.54991e+10	1.31648e-05	47.3935		2450	3151	1462.84	56.3143	0.108624	2.30565e+11	2.30565e+11	2.5045e+10	1.56384e-05	56.2984		2950	3151	2002.95	66.5143	0.145356	2.56148e+11
1000	3161	296.686	24.9857	0.0294091	1.56374e+11	1.56374e+11	4.59883e+09	7.22721e-06	26.018		1500	3161	602.032	40.5429	0.0509534	1.81957e+11	1.81957e+11	9.27134e+09	1.05228e-05	37.882		1950	3161	992.991	45.3429	0.0756564	2.04982e+11	2.04982e+11	1.55082e+10	1.31641e-05	47.3909		2450	3161	1464.15	55.9714	0.108727	2.30565e+11	2.30565e+11	2.50686e+10	1.56363e-05	56.2908		2950	3161	2004.44	63.9429	0.145537	2.56148e+11
1000	3171	297.221	22.9286	0.0294124	1.56374e+11	1.56374e+11	4.59934e+09	7.22719e-06	26.0179		1500	3171	602.791	32.5286	0.0509687	1.81957e+11	1.81957e+11	9.27412e+09	1.05226e-05	37.8814		1950	3171	994.058	45.7286	0.0757002	2.04982e+11	2.04982e+11	1.55172e+10	1.31634e-05	47.3883		2450	3171	1465.5	57.8143	0.108829	2.30565e+11	2.30565e+11	2.50922e+10	1.56342e-05	56.2832		2950	3171	2005.89	61.9714	0.145717	2.56148e+11
1000	3181	297.852	27.0429	0.0294156	1.56374e+11	1.56374e+11	4.59985e+09	7.22716e-06	26.0178		1500	3181	603.587	34.1143	0.0509838	1.81957e+11	1.81957e+11	9.27687e+09	1.05224e-05	37.8807		1950	3181	995.122	45.6	0.0757438	2.04982e+11	2.04982e+11	1.55261e+10	1.31627e-05	47.3857		2450	3181	1466.84	57.3857	0.108931	2.30565e+11	2.30565e+11	2.51156e+10	1.56321e-05	56.2757		2950	3181	2006.91	43.8	0.145897	2.56148e+11
1000	3191	298.422	24.4286	0.0294188	1.56374e+11	1.56374e+11	4.60035e+09	7.22714e-06	26.0177		1500	3191	604.231	27.6	0.0509988	1.81957e+11	1.81957e+11	9.27959e+09	1.05222e-05	37.8801		1950	3191	996.116	42.6	0.075787	2.04982e+11	2.04982e+11	1.5535e+10	1.3162e-05	47.3832		2450	3191	1463.97	-41.0286	0.109032	2.30565e+11	2.30565e+11	2.5139e+10	1.563e-05	56.2682		2950	3191	2008.32	60.6	0.146076	2.56148e+11
1000	3201	298.979	23.8714	0.029422	1.56374e+11	1.56374e+11	4.60084e+09	7.22712e-06	26.0176		1500	3201	605.178	40.5857	0.0510136	1.81957e+11	1.81957e+11	9.28229e+09	1.05221e-05	37.8794		1950	3201	997.081	41.3571	0.07583	2.04982e+11	2.04982e+11	1.55438e+10	1.31613e-05	47.3807		2450	3201	1465.22	53.8286	0.109133	2.30565e+11	2.30565e+11	2.51622e+10	1.5628e-05	56.2607		2950	3201	2009.82	64.2857	0.146255	2.56148e+11
1000	3211	299.557	24.7714	0.0294251	1.56374e+11	1.56374e+11	4.60132e+09	7.2271e-06	26.0175		1500	3211	606.133	40.9286	0.0510282	1.81957e+11	1.81957e+11	9.28495e+09	1.05219e-05	37.8788		1950	3211	998.045	41.3143	0.0758727	2.04982e+11	2.04982e+11	1.55525e+10	1.31606e-05	47.3782		2450	3211	1466.42	51.5143	0.109233	2.30565e+11	2.30565e+11	2.51853e+10	1.56259e-05	56.2533		2950	3211	2011.31	63.9429	0.146433	2.56148e+11
1000	3221	300.164	26.0143	0.0294281	1.56374e+11	1.56374e+11	4.6018e+09	7.22707e-06	26.0175		1500	3221	606.839	30.2571	0.0510428	1.81957e+11	1.81957e+11	9.2876e+09	1.05217e-05	37.8782		1950	3221	999.315	54.4286	0.075915	2.04982e+11	2.04982e+11	1.55612e+10	1.31599e-05	47.3757		2450	3221	1467.51	46.4143	0.109333	2.30565e+11	2.30565e+11	2.52084e+10	1.56239e-05	56.2459		2950	3221	2012.77	62.4	0.146611	2.56148e+11
1000	3231	300.721	23.8714	0.0294311	1.56374e+11	1.56374e+11	4.60227e+09	7.22705e-06	26.0174		1500	3231	607.892	45.1286	0.0510571	1.81957e+11	1.81957e+11	9.29021e+09	1.05215e-05	37.8775		1950	3231	1000.35	44.2286	0.0759571	2.04982e+11	2.04982e+11	1.55698e+10	1.31592e-05	47.3732		2450	3231	1468.71	51.6	0.109433	2.30565e+11	2.30565e+11	2.52313e+10	1.56218e-05	56.2385		2950	3231	2014.3	65.6143	0.146787	2.56148e+11
1000	3241	301.327	25.9714	0.0294341	1.56374e+11	1.56374e+11	4.60273e+09	7.22703e-06	26.0173		1500	3241	608.784	38.2286	0.0510714	1.81957e+11	1.81957e+11	9.2928e+09	1.05214e-05	37.8769		1950	3241	1001.48	48.4714	0.0759989	2.04982e+11	2.04982e+11	1.55784e+10	1.31585e-05	47.3708		2450	3241	1470.08	58.7143	0.109532	2.30565e+11	2.30565e+11	2.52541e+10	1.56198e-05	56.2312		2950	3241	2015.75	62.1857	0.146964	2.56148e+11
1000	3251	301.948	26.6143	0.029437	1.56374e+11	1.56374e+11	4.60319e+09	7.22701e-06	26.0172		1500	3251	609.597	34.8429	0.0510855	1.81957e+11	1.81957e+11	9.29537e+09	1.05212e-05	37.8763		1950	3251	1002.5	43.9714	0.0760404	2.04982e+11	2.04982e+11	1.55869e+10	1.31579e-05	47.3683		2450	3251	1471.31	52.5	0.10963	2.30565e+11	2.30565e+11	2.52769e+10	1.56177e-05	56.2239		2950	3251	2017.2	62.0571	0.14714	2.56148e+11
1000	3261	301.625	-4.61429	0.0294399	1.56374e+11	1.56374e+11	4.60364e+09	7.22699e-06	26.0172		1500	3261	610.524	39.7286	0.0510994	1.81957e+11	1.81957e+11	9.29791e+09	1.0521e-05	37.8757		1950	3261	1003.18	29.1	0.0760817	2.04982e+11	2.04982e+11	1.55954e+10	1.31572e-05	47.3659		2450	3261	1472.61	55.9286	0.109728	2.30565e+11	2.30565e+11	2.52995e+10	1.56157e-05	56.2166		2950	3261	2018.66	62.6571	0.147315	2.56148e+11
1000	3271	302.201	24.6857	0.0294427	1.56374e+11	1.56374e+11	4.60408e+09	7.22697e-06	26.0171		1500	3271	611.331	34.5857	0.0511132	1.81957e+11	1.81957e+11	9.30042e+09	1.05209e-05	37.8751		1950	3271	1004.35	49.8857	0.0761226	2.04982e+11	2.04982e+11	1.56038e+10	1.31565e-05	47.3635		2450	3271	1473.89	54.8571	0.109826	2.30565e+11	2.30565e+11	2.5322e+10	1.56137e-05	56.2094		2950	3271	2020.19	65.6571	0.147489	2.56148e+11
1000	3281	302.775	24.6	0.0294455	1.56374e+11	1.56374e+11	4.60452e+09	7.22695e-06	26.017		1500	3281	612.14	34.6714	0.0511269	1.81957e+11	1.81957e+11	9.30291e+09	1.05207e-05	37.8745		1950	3281	1005.39	44.6571	0.0761633	2.04982e+11	2.04982e+11	1.56121e+10	1.31559e-05	47.3611		2450	3281	1475.23	57.3857	0.109923	2.30565e+11	2.30565e+11	2.53445e+10	1.56117e-05	56.2022		2950	3281	2021.69	63.9	0.147664	2.56148e+11
1000	3291	303.435	28.2857	0.0294482	1.56374e+11	1.56374e+11	4.60495e+09	7.22693e-06	26.0169		1500	3291	612.82	29.1429	0.0511405	1.81957e+11	1.81957e+11	9.30537e+09	1.05205e-05	37.8739		1950	3291	1006.54	49.2429	0.0762037	2.04982e+11	2.04982e+11	1.56204e+10	1.31552e-05	47.3588		2450	3291	1476.47	53.3571	0.11002	2.30565e+11	2.30565e+11	2.53668e+10	1.56097e-05	56.1951		2950	3291	2023.24	66.6	0.147837	2.56148e+11
1000	3301	303.944	21.8143	0.029451	1.56374e+11	1.56374e+11	4.60537e+09	7.22691e-06	26.0169		1500	3301	613.587	32.8714	0.0511539	1.81957e+11	1.81957e+11	9.30781e+09	1.05204e-05	37.8733		1950	3301	1007.69	49.4571	0.0762439	2.04982e+11	2.04982e+11	1.56286e+10	1.31546e-05	47.3564		2450	3301	1477.37	38.2286	0.110117	2.30565e+11	2.30565e+11	2.5389e+10	1.56078e-05	56.1879		2950	3301	2024.73	63.7714	0.14801	2.56148e+11
1000	3311	304.639	29.7857	0.0294536	1.56374e+11	1.56374e+11	4.60579e+09	7.22689e-06	26.0168		1500	3311	614.491	38.7429	0.0511671	1.81957e+11	1.81957e+11	9.31022e+09	1.05202e-05	37.8728		1950	3311	1008.82	48.4286	0.0762837	2.04982e+11	2.04982e+11	1.56368e+10	1.31539e-05	47.3541		2450	3311	1478.64	54.5143	0.110213	2.30565e+11	2.30565e+11	2.54112e+10	1.56058e-05	56.1809		2950	3311	2026.28	66.3429	0.148183	2.56148e+11
1000	3321	305.127	20.9143	0.0294563	1.56374e+11	1.56374e+11	4.6062e+09	7.22687e-06	26.0167		1500	3321	615.413	39.5143	0.0511803	1.81957e+11	1.81957e+11	9.31261e+09	1.05201e-05	37.8722		1950	3321	1009.92	47.0571	0.0763233	2.04982e+11	2.04982e+11	1.56449e+10	1.31533e-05	47.3517		2450	3321	1480	58.2	0.110308	2.30565e+11	2.30565e+11	2.54332e+10	1.56038e-05	56.1738		2950	3321	2027.82	66	0.148354	2.56148e+11
1000	3331	305.695	24.3429	0.0294589	1.56374e+11	1.56374e+11	4.6066e+09	7.22685e-06	26.0167		1500	3331	616.306	38.2714	0.0511933	1.81957e+11	1.81957e+11	9.31498e+09	1.05199e-05	37.8716		1950	3331	1011.08	49.8	0.0763627	2.04982e+11	2.04982e+11	1.5653e+10	1.31526e-05	47.3494		2450	3331	1481.31	56.3143	0.110403	2.30565e+11	2.30565e+11	2.54551e+10	1.56019e-05	56.1668		2950	3331	2029.33	65.0143	0.148526	2.56148e+11
1000	3341	306.189	21.1714	0.0294614	1.56374e+11	1.56374e+11	4.607e+09	7.22683e-06	26.0166		1500	3341	617.199	38.2714	0.0512061	1.81957e+11	1.81957e+11	9.31732e+09	1.05197e-05	37.8711		1950	3341	1012.2	48.1286	0.0764017	2.04982e+11	2.04982e+11	1.5661e+10	1.3152e-05	47.3472		2450	3341	1482.73	60.8143	0.110498	2.30565e+11	2.30565e+11	2.5477e+10	1.55999e-05	56.1598		2950	3341	2030.91	67.4143	0.148697	2.56148e+11
1000	3351	306.723	22.8857	0.0294639	1.56374e+11	1.56374e+11	4.6074e+09	7.22681e-06	26.0165		1500	3351	618.145	40.5429	0.0512189	1.81957e+11	1.81957e+11	9.31964e+09	1.05196e-05	37.8705		1950	3351	1013.31	47.2286	0.0764405	2.04982e+11	2.04982e+11	1.56689e+10	1.31514e-05	47.3449		2450	3351	1484.05	56.6571	0.110593	2.30565e+11	2.30565e+11	2.54988e+10	1.5598e-05	56.1528		2950	3351	2030.88	0.00250696	0.148867	2.56148e+11
1000	3361	307.318	25.5	0.0294664	1.56374e+11	1.56374e+11	4.60779e+09	7.22679e-06	26.0165		1500	3361	619.041	38.4	0.0512315	1.81957e+11	1.81957e+11	9.32194e+09	1.05194e-05	37.87		1950	3361	1014.36	45.0429	0.0764791	2.04982e+11	2.04982e+11	1.56768e+10	1.31507e-05	47.3426		2450	3361	1485.37	56.4429	0.110687	2.30565e+11	2.30565e+11	2.55204e+10	1.55961e-05	56.1459		2950	3361	2033.06	93.3	0.149037	2.56148e+11
1000	3371	307.855	23.0143	0.0294689	1.56374e+11	1.56374e+11	4.60817e+09	7.22677e-06	26.0164		1500	3371	619.901	36.8571	0.051244	1.81957e+11	1.81957e+11	9.32422e+09	1.05193e-05	37.8694		1950	3371	1015.5	49.1571	0.0765174	2.04982e+11	2.04982e+11	1.56847e+10	1.31501e-05	47.3404		2450	3371	1485.3	0.00799841	0.11078	2.30565e+11	2.30565e+11	2.5542e+10	1.55942e-05	56.139		2950	3371	2035.11	87.6	0.149206	2.56148e+11
1000	3381	308.399	23.3143	0.0294713	1.56374e+11	1.56374e+11	4.60855e+09	7.22676e-06	26.0163		1500	3381	620.768	37.1571	0.0512564	1.81957e+11	1.81957e+11	9.32647e+09	1.05191e-05	37.8689		1950	3381	1016.59	46.5857	0.0765554	2.04982e+11	2.04982e+11	1.56925e+10	1.31495e-05	47.3382		2450	3381	1487.21	81.9857	0.110873	2.30565e+11	2.30565e+11	2.55634e+10	1.55923e-05	56.1321		2950	3381	2037.07	84.0429	0.149375	2.56148e+11
1000	3391	309.024	26.7857	0.0294737	1.56374e+11	1.56374e+11	4.60892e+09	7.22674e-06	26.0163		1500	3391	621.676	38.9143	0.0512686	1.81957e+11	1.81957e+11	9.3287e+09	1.0519e-05	37.8684		1950	3391	1017.78	51.1286	0.0765932	2.04982e+11	2.04982e+11	1.57002e+10	1.31489e-05	47.3359		2450	3391	1488.94	73.8857	0.110966	2.30565e+11	2.30565e+11	2.55848e+10	1.55904e-05	56.1253		2950	3391	2038.78	73.3714	0.149543	2.56148e+11
1000	3401	309.541	22.1571	0.029476	1.56374e+11	1.56374e+11	4.60929e+09	7.22672e-06	26.0162		1500	3401	622.52	36.1714	0.0512808	1.81957e+11	1.81957e+11	9.3309e+09	1.05188e-05	37.8679		1950	3401	1018.95	49.9714	0.0766307	2.04982e+11	2.04982e+11	1.57079e+10	1.31483e-05	47.3337		2450	3401	1490.53	68.0571	0.111058	2.30565e+11	2.30565e+11	2.56061e+10	1.55885e-05	56.1185		2950	3401	2040.8	86.5286	0.14971	2.56148e+11
1000	3411	310.089	23.4857	0.0294783	1.56374e+11	1.56374e+11	4.60965e+09	7.22671e-06	26.0161		1500	3411	623.404	37.8857	0.0512928	1.81957e+11	1.81957e+11	9.33309e+09	1.05187e-05	37.8673		1950	3411	1018.95	0.000596896	0.076668	2.04982e+11	2.04982e+11	1.57155e+10	1.31477e-05	47.3316		2450	3411	1492.39	79.8	0.11115	2.30565e+11	2.30565e+11	2.56273e+10	1.55866e-05	56.1117		2950	3411	2042.89	89.7	0.149877	2.56148e+11
1000	3421	310.651	24.0857	0.0294806	1.56374e+11	1.56374e+11	4.61e+09	7.22669e-06	26.0161		1500	3421	624.269	37.0714	0.0513047	1.81957e+11	1.81957e+11	9.33525e+09	1.05186e-05	37.8668		1950	3421	1020.8	79.5	0.076705	2.04982e+11	2.04982e+11	1.57231e+10	1.31471e-05	47.3294		2450	3421	1494.03	70.1571	0.111242	2.30565e+11	2.30565e+11	2.56484e+10	1.55847e-05	56.105		2950	3421	2044.84	83.4429	0.150044	2.56148e+11
1000	3431	311.194	23.2714	0.0294828	1.56374e+11	1.56374e+11	4.61035e+09	7.22667e-06	26.016		1500	3431	625.131	36.9429	0.0513164	1.81957e+11	1.81957e+11	9.33739e+09	1.05184e-05	37.8663		1950	3431	1022.13	57.1286	0.0767418	2.04982e+11	2.04982e+11	1.57307e+10	1.31465e-05	47.3272		2450	3431	1495.53	64.6714	0.111333	2.30565e+11	2.30565e+11	2.56694e+10	1.55828e-05	56.0983		2950	3431	2046.84	85.8429	0.15021	2.56148e+11
1000	3441	311.74	23.4	0.029485	1.56374e+11	1.56374e+11	4.6107e+09	7.22666e-06	26.016		1500	3441	626.058	39.7286	0.0513281	1.81957e+11	1.81957e+11	9.33951e+09	1.05183e-05	37.8658		1950	3441	1023.49	58.3286	0.0767783	2.04982e+11	2.04982e+11	1.57382e+10	1.31459e-05	47.3251		2450	3441	1497.35	77.8714	0.111424	2.30565e+11	2.30565e+11	2.56903e+10	1.5581e-05	56.0916		2950	3441	2048.78	83.2714	0.150376	2.56148e+11
1000	3451	312.258	22.2	0.0294872	1.56374e+11	1.56374e+11	4.61104e+09	7.22664e-06	26.0159		1500	3451	626.098	-0.00477517	0.0513396	1.81957e+11	1.81957e+11	9.34161e+09	1.05181e-05	37.8653		1950	3451	1024.82	56.9571	0.0768146	2.04982e+11	2.04982e+11	1.57456e+10	1.31453e-05	47.323		2450	3451	1499.14	76.5429	0.111514	2.30565e+11	2.30565e+11	2.57112e+10	1.55791e-05	56.0849		2950	3451	2050.78	85.6714	0.150541	2.56148e+11
1000	3461	312.73	20.2286	0.0294894	1.56374e+11	1.56374e+11	4.61138e+09	7.22663e-06	26.0159		1500	3461	627.691	68.2714	0.051351	1.81957e+11	1.81957e+11	9.34369e+09	1.0518e-05	37.8648		1950	3461	1026.16	57.2571	0.0768506	2.04982e+11	2.04982e+11	1.5753e+10	1.31447e-05	47.3209		2450	3461	1500.96	77.9571	0.111604	2.30565e+11	2.30565e+11	2.57319e+10	1.55773e-05	56.0783		2950	3461	2052.85	88.4143	0.150705	2.56148e+11
1000	3471	313.43	30	0.0294915	1.56374e+11	1.56374e+11	4.61171e+09	7.22661e-06	26.0158		1500	3471	628.846	49.5	0.0513624	1.81957e+11	1.81957e+11	9.34575e+09	1.05179e-05	37.8643		1950	3471	1027.64	63.3429	0.0768864	2.04982e+11	2.04982e+11	1.57603e+10	1.31441e-05	47.3188		2450	3471	1502.69	74.4857	0.111693	2.30565e+11	2.30565e+11	2.57526e+10	1.55755e-05	56.0717		2950	3471	2054.92	88.9286	0.150869	2.56148e+11
1000	3481	313.978	23.4857	0.0294936	1.56374e+11	1.56374e+11	4.61203e+09	7.22659e-06	26.0157		1500	3481	629.887	44.6143	0.0513736	1.81957e+11	1.81957e+11	9.34779e+09	1.05177e-05	37.8638		1950	3481	1029.14	64.3714	0.076922	2.04982e+11	2.04982e+11	1.57676e+10	1.31435e-05	47.3167		2450	3481	1504.39	72.7714	0.111783	2.30565e+11	2.30565e+11	2.57731e+10	1.55737e-05	56.0652		2950	3481	2056.97	87.9	0.151033	2.56148e+11
1000	3491	302.394		0.0294956	1.56374e+11	1.56374e+11	4.61235e+09	7.22658e-06	26.0157		1500	3491	630.893	43.1143	0.0513846	1.81957e+11	1.81957e+11	9.3498e+09	1.05176e-05	37.8634		1950	3491	1030.64	64.2429	0.0769573	2.04982e+11	2.04982e+11	1.57749e+10	1.3143e-05	47.3146		2450	3491	1506.16	75.9	0.111871	2.30565e+11	2.30565e+11	2.57936e+10	1.55718e-05	56.0586		2950	3491	2059.02	87.9429	0.151196	2.56148e+11
1000	3501	303.544		0.0294976	1.56374e+11	1.56374e+11	4.61267e+09	7.22656e-06	26.0156		1500	3501	632.061	50.0571	0.0513956	1.81957e+11	1.81957e+11	9.3518e+09	1.05175e-05	37.8629		1950	3501	1032.19	66.4714	0.0769924	2.04982e+11	2.04982e+11	1.5782e+10	1.31424e-05	47.3126		2450	3501	1507.94	75.9429	0.11196	2.30565e+11	2.30565e+11	2.5814e+10	1.557e-05	56.0521		2950	3501	2061.11	89.3143	0.151359	2.56148e+11
1000	3511	304.628		0.0294996	1.56374e+11	1.56374e+11	4.61298e+09	7.22655e-06	26.0156		1500	3511	633.192	48.4714	0.0514065	1.81957e+11	1.81957e+11	9.35378e+09	1.05173e-05	37.8624		1950	3511	1033.72	65.5286	0.0770273	2.04982e+11	2.04982e+11	1.57892e+10	1.31418e-05	47.3105		2450	3511	1509.78	79.1571	0.112048	2.30565e+11	2.30565e+11	2.58343e+10	1.55682e-05	56.0457		2950	3511	2063.18	88.8429	0.151521	2.56148e+11
1000	3521	305.566									1500	3521	634.201	43.2429								1950	3521	1035.2	63.3429								2450	3521	1511.64	79.4571								2950	3521	2065.25	88.6286
1000	3531	306.536									1500	3531	635.349	49.2								1950	3531	1036.76	67.1143								2450	3531	1513.45	77.8286								2950	3531	2067.37	90.7286
1000	3541	307.384									1500	3541	636.596	53.4429								1950	3541	1038.24	63.4286								2450	3541	1515.28	78.1286								2950	3541	2069.44	89.0143
1000	3551	308.377									1500	3551	637.812	52.1143								1950	3551	1039.73	63.9429								2450	3551	1517.1	78.3								2950	3551	2071.56	90.5571
1000	3561	309.171									1500	3561	639.059	53.4429								1950	3561	1041.21	63.2571								2450	3561	1518.94	78.8143								2950	3561	2066.39	-73.8571
1000	3571	310.053									1500	3571	640.27	51.9								1950	3571	1042.68	62.8286								2450	3571	1520.83	81								0	3571	2068.21	78
1000	3581	310.949									1500	3581	641.509	53.1								1950	3581	1044.24	67.1143								2450	3581	1522.65	77.8286								0	3581	2069.97	75.6
1000	3591	311.799									1500	3591	642.733	52.4571								1950	3591	1045.82	67.5429								2450	3591	1524.48	78.4714								2950	3591	2071.67	73.0714
[truncated: 56 more columns]

## Sheet: Flux data AaV 3
TMP (Pa)	Time (s)	weight	J measured (LMH)	ω (kg/m2)	α (eq)	α	Rc model (1/m)	Jmodel (m/s)	Jmodel (LMH)		TMP (Pa)	Time (s)	weight	J measured (LMH)	ω (kg/m2)	α (eq)	α	Rc model (1/m)	Jmodel (m/s)	Jmodel (LMH)		TMP (Pa)	Time (s)	weight	J measured (LMH)	ω (kg/m2)	α (eq)	α	Rc model (1/m)	Jmodel (m/s)	Jmodel (LMH)		TMP (Pa)	Time (s)	weight	J measured (LMH)	ω (kg/m2)	α (eq)	α	Rc model (1/m)	Jmodel (m/s)	Jmodel (LMH)		TMP (Pa)	Time (s)	weight	J measured (LMH)	ω (kg/m2)	α (eq)
1000	1	103.244	32.5714	0	1.67316e+11	1.67316e+11	0	7.44879e-06	26.8156		1500	1	314.969	43.8	0	1.90236e+11	1.90236e+11	0	1.11732e-05	40.2235		1950	1	630.535	72.3	0	2.10863e+11	2.10863e+11	0	1.45251e-05	52.2905		2450	1	1014.92	78.6	0	2.33783e+11	2.33783e+11	0	1.82495e-05	65.6983		2950	1	1484.81	90.7714	0	2.56702e+11
1000	11	103.989	31.9286	0.000571322	1.67316e+11	1.67316e+11	9.55915e+07	7.44405e-06	26.7986		1500	11	315.962	42.5571	0.000856983	1.90236e+11	1.90236e+11	1.63029e+08	1.11611e-05	40.1798		1950	11	631.703	50.0571	0.00111408	2.10863e+11	2.10863e+11	2.34918e+08	1.45024e-05	52.2087		2450	11	1016.25	57.3857	0.00139974	2.33783e+11	2.33783e+11	3.27235e+08	1.82098e-05	65.5553		2950	11	1486.38	67.2	0.0016854	2.56702e+11
1000	21	104.548	23.9571	0.00112796	1.67316e+11	1.67316e+11	1.88727e+08	7.43943e-06	26.7819		1500	21	316.857	38.3571	0.00169162	1.90236e+11	1.90236e+11	3.21807e+08	1.11493e-05	40.1374		1950	21	632.87	50.0143	0.00219865	2.10863e+11	2.10863e+11	4.63614e+08	1.44804e-05	52.1294		2450	21	1017.49	53.1429	0.00276164	2.33783e+11	2.33783e+11	6.45624e+08	1.81713e-05	65.4168		2950	21	1488.41	86.9571	0.00332418	2.56702e+11
1000	31	105.202	28.0286	0.00167046	1.67316e+11	1.67316e+11	2.79495e+08	7.43494e-06	26.7658		1500	31	317.717	36.8571	0.00250485	1.90236e+11	1.90236e+11	4.76512e+08	1.11378e-05	40.0961		1950	31	633.809	40.2429	0.00325508	2.10863e+11	2.10863e+11	6.86377e+08	1.4459e-05	52.0523		2450	31	1018.76	54.1286	0.00408767	2.33783e+11	2.33783e+11	9.55626e+08	1.8134e-05	65.2824		2950	31	1490.12	73.4143	0.004919	2.56702e+11
1000	41	105.644	18.9429	0.00219931	1.67316e+11	1.67316e+11	3.67981e+08	7.43056e-06	26.75		1500	41	318.542	35.3571	0.00329754	1.90236e+11	1.90236e+11	6.27311e+08	1.11267e-05	40.0559		1950	41	634.917	47.4857	0.00428466	2.10863e+11	2.10863e+11	9.03477e+08	1.44382e-05	51.9774		2450	41	1020.58	77.9143	0.00537963	2.33783e+11	2.33783e+11	1.25766e+09	1.80978e-05	65.1521		2950	41	1491.66	65.9143	0.00647226	2.56702e+11
1000	51	106.352	30.3429	0.00271501	1.67316e+11	1.67316e+11	4.54265e+08	7.4263e-06	26.7347		1500	51	319.366	35.3143	0.00407053	1.90236e+11	1.90236e+11	7.74361e+08	1.11158e-05	40.0169		1950	51	635.929	43.3714	0.00528858	2.10863e+11	2.10863e+11	1.11517e+09	1.4418e-05	51.9046		2450	51	1022.01	61.5	0.00663918	2.33783e+11	2.33783e+11	1.55213e+09	1.80626e-05	65.0255		2950	51	1493.23	67.5429	0.00798619	2.56702e+11
1000	61	106.856	21.6	0.003218	1.67316e+11	1.67316e+11	5.38425e+08	7.42215e-06	26.7197		1500	61	320.252	37.9714	0.00482459	1.90236e+11	1.90236e+11	9.17809e+08	1.11052e-05	39.9788		1950	61	637.352	60.9857	0.00626796	2.10863e+11	2.10863e+11	1.32168e+09	1.43983e-05	51.8338		2450	61	1023.34	57.0857	0.00786789	2.33783e+11	2.33783e+11	1.83938e+09	1.80285e-05	64.9025		2950	61	1495.03	76.8857	0.00946284	2.56702e+11
1000	71	107.398	23.2286	0.00370874	1.67316e+11	1.67316e+11	6.20532e+08	7.4181e-06	26.7052		1500	71	321.035	33.5571	0.00556045	1.90236e+11	1.90236e+11	1.0578e+09	1.10949e-05	39.9418		1950	71	638.62	54.3429	0.00722383	2.10863e+11	2.10863e+11	1.52324e+09	1.43791e-05	51.7648		2450	71	1024.56	52.0286	0.0090672	2.33783e+11	2.33783e+11	2.11975e+09	1.79952e-05	64.7828		2950	71	1496.85	78.1714	0.0109041	2.56702e+11
1000	81	107.92	22.3714	0.00418762	1.67316e+11	1.67316e+11	7.00657e+08	7.41416e-06	26.691		1500	81	321.887	36.5143	0.0062788	1.90236e+11	1.90236e+11	1.19445e+09	1.10849e-05	39.9057		1950	81	639.77	49.2857	0.00815719	2.10863e+11	2.10863e+11	1.72005e+09	1.43605e-05	51.6977		2450	81	1026.09	65.7857	0.0102384	2.33783e+11	2.33783e+11	2.39357e+09	1.79629e-05	64.6664		2950	81	1498.51	70.8429	0.0123117	2.56702e+11
1000	91	108.46	23.1429	0.00465504	1.67316e+11	1.67316e+11	7.78864e+08	7.41031e-06	26.6771		1500	91	322.79	38.7	0.00698031	1.90236e+11	1.90236e+11	1.3279e+09	1.10751e-05	39.8705		1950	91	640.834	45.6	0.00906895	2.10863e+11	2.10863e+11	1.91231e+09	1.43423e-05	51.6323		2450	91	1027.6	64.6714	0.0113829	2.33783e+11	2.33783e+11	2.66111e+09	1.79314e-05	64.5531		2950	91	1500.28	76.2	0.0136873	2.56702e+11
1000	101	108.902	18.9429	0.00511139	1.67316e+11	1.67316e+11	8.55219e+08	7.40656e-06	26.6636		1500	101	323.669	37.6714	0.00766557	1.90236e+11	1.90236e+11	1.45827e+09	1.10656e-05	39.8362		1950	101	641.82	42.2571	0.00995997	2.10863e+11	2.10863e+11	2.10019e+09	1.43246e-05	51.5685		2450	101	1029.16	66.6429	0.0125016	2.33783e+11	2.33783e+11	2.92266e+09	1.79007e-05	64.4427		2950	101	1502.05	75.5571	0.0150324	2.56702e+11
1000	111	109.488	25.1143	0.00555701	1.67316e+11	1.67316e+11	9.29779e+08	7.4029e-06	26.6504		1500	111	324.601	39.9429	0.00833519	1.90236e+11	1.90236e+11	1.58565e+09	1.10563e-05	39.8027		1950	111	642.956	48.6857	0.0108311	2.10863e+11	2.10863e+11	2.28387e+09	1.43073e-05	51.5063		2450	111	1030.63	63.2571	0.0135958	2.33783e+11	2.33783e+11	3.17847e+09	1.78709e-05	64.3351		2950	111	1503.74	72.5143	0.0163483	2.56702e+11
1000	121	110.021	22.8429	0.00599227	1.67316e+11	1.67316e+11	1.0026e+09	7.39933e-06	26.6376		1500	121	325.462	36.9	0.00898972	1.90236e+11	1.90236e+11	1.71017e+09	1.10472e-05	39.77		1950	121	644.201	53.3571	0.011683	2.10863e+11	2.10863e+11	2.46352e+09	1.42904e-05	51.4456		2450	121	1032.2	67.0714	0.0146665	2.33783e+11	2.33783e+11	3.42878e+09	1.78417e-05	64.2301		2950	121	1505.54	77.1857	0.0176364	2.56702e+11
1000	131	110.573	23.6571	0.00641747	1.67316e+11	1.67316e+11	1.07375e+09	7.39585e-06	26.6251		1500	131	326.395	39.9857	0.00962967	1.90236e+11	1.90236e+11	1.83191e+09	1.10384e-05	39.7382		1950	131	645.455	53.7429	0.0125165	2.10863e+11	2.10863e+11	2.63927e+09	1.4274e-05	51.3864		2450	131	1033.65	62.4	0.0157146	2.33783e+11	2.33783e+11	3.6738e+09	1.78133e-05	64.1277		2950	131	1507.38	79.0286	0.0188978	2.56702e+11
1000	141	111.136	24.1286	0.00683294	1.67316e+11	1.67316e+11	1.14326e+09	7.39245e-06	26.6128		1500	141	327.325	39.8571	0.0102556	1.90236e+11	1.90236e+11	1.95097e+09	1.10297e-05	39.707		1950	141	646.695	53.1429	0.0133323	2.10863e+11	2.10863e+11	2.81128e+09	1.42579e-05	51.3285		2450	141	1035.11	62.2714	0.016741	2.33783e+11	2.33783e+11	3.91376e+09	1.77855e-05	64.0277		2950	141	1509.22	78.6	0.0201338	2.56702e+11
1000	151	111.652	22.1143	0.00723898	1.67316e+11	1.67316e+11	1.2112e+09	7.38912e-06	26.6008		1500	151	328.074	32.1	0.0108679	1.90236e+11	1.90236e+11	2.06745e+09	1.10213e-05	39.6766		1950	151	647.906	51.9	0.0141309	2.10863e+11	2.10863e+11	2.97968e+09	1.42422e-05	51.272		2450	151	1036.56	62.5286	0.0177466	2.33783e+11	2.33783e+11	4.14885e+09	1.77584e-05	63.9301		2950	151	1510.98	75.4286	0.0213454	2.56702e+11
1000	161	112.613	41.1857	0.00763588	1.67316e+11	1.67316e+11	1.27761e+09	7.38588e-06	26.5892		1500	161	328.898	35.3143	0.011467	1.90236e+11	1.90236e+11	2.18143e+09	1.1013e-05	39.6469		1950	161	649.111	51.6429	0.014913	2.10863e+11	2.10863e+11	3.14461e+09	1.42269e-05	51.2168		2450	161	1038.11	66.2143	0.0187322	2.33783e+11	2.33783e+11	4.37926e+09	1.77319e-05	63.8347		2950	161	1512.87	80.9143	0.0225335	2.56702e+11
1000	171	113.198	25.0714	0.0080239	1.67316e+11	1.67316e+11	1.34253e+09	7.38271e-06	26.5778		1500	171	329.722	35.3143	0.0120535	1.90236e+11	1.90236e+11	2.293e+09	1.1005e-05	39.6178		1950	171	650.348	53.0143	0.0156793	2.10863e+11	2.10863e+11	3.30618e+09	1.42119e-05	51.1628		2450	171	1039.7	68.2714	0.0196985	2.33783e+11	2.33783e+11	4.60516e+09	1.77059e-05	63.7414		2950	171	1514.68	77.8286	0.0236991	2.56702e+11
1000	181	113.67	20.2286	0.00840332	1.67316e+11	1.67316e+11	1.40601e+09	7.37962e-06	26.5666		1500	181	330.711	42.3857	0.0126276	1.90236e+11	1.90236e+11	2.40222e+09	1.09971e-05	39.5894		1950	181	651.442	46.8857	0.0164301	2.10863e+11	2.10863e+11	3.4645e+09	1.41972e-05	51.11		2450	181	1041.19	63.8571	0.0206462	2.33783e+11	2.33783e+11	4.82672e+09	1.76806e-05	63.6502		2950	181	1516.55	80.2714	0.0248432	2.56702e+11
1000	191	114.271	25.7571	0.00877439	1.67316e+11	1.67316e+11	1.4681e+09	7.37659e-06	26.5557		1500	191	331.617	38.8286	0.0131898	1.90236e+11	1.90236e+11	2.50918e+09	1.09894e-05	39.5617		1950	191	652.675	52.8429	0.0171661	2.10863e+11	2.10863e+11	3.6197e+09	1.41829e-05	51.0584		2450	191	1042.76	67.2429	0.021576	2.33783e+11	2.33783e+11	5.04409e+09	1.76558e-05	63.5609		2950	191	1518.41	79.6286	0.0259664	2.56702e+11
1000	201	114.854	24.9857	0.00913735	1.67316e+11	1.67316e+11	1.52883e+09	7.37364e-06	26.5451		1500	201	332.559	40.3714	0.0137405	1.90236e+11	1.90236e+11	2.61394e+09	1.09818e-05	39.5345		1950	201	653.894	52.2429	0.0178877	2.10863e+11	2.10863e+11	3.77187e+09	1.41689e-05	51.0079		2450	201	1044.4	70.2429	0.0224885	2.33783e+11	2.33783e+11	5.25743e+09	1.76316e-05	63.4736		2950	201	1520.21	77.2286	0.0270696	2.56702e+11
1000	211	115.468	26.3143	0.00949244	1.67316e+11	1.67316e+11	1.58824e+09	7.37075e-06	26.5347		1500	211	333.522	41.2714	0.01428	1.90236e+11	1.90236e+11	2.71657e+09	1.09744e-05	39.508		1950	211	655.102	51.7714	0.0185955	2.10863e+11	2.10863e+11	3.92111e+09	1.41551e-05	50.9584		2450	211	1045.96	66.9429	0.0233844	2.33783e+11	2.33783e+11	5.46687e+09	1.76078e-05	63.3881		2950	211	1522.01	77.0571	0.0281536	2.56702e+11
1000	221	115.983	22.0714	0.00983988	1.67316e+11	1.67316e+11	1.64637e+09	7.36792e-06	26.5245		1500	221	334.465	40.4143	0.0148087	1.90236e+11	1.90236e+11	2.81714e+09	1.09672e-05	39.482		1950	221	656.273	50.1857	0.0192898	2.10863e+11	2.10863e+11	4.06751e+09	1.41417e-05	50.91		2450	221	1047.54	67.8	0.0242642	2.33783e+11	2.33783e+11	5.67255e+09	1.75845e-05	63.3043		2950	221	1523.94	82.5429	0.029219	2.56702e+11
1000	231	116.507	22.4571	0.0101799	1.67316e+11	1.67316e+11	1.70326e+09	7.36516e-06	26.5146		1500	231	335.415	40.7143	0.0153269	1.90236e+11	1.90236e+11	2.91572e+09	1.09601e-05	39.4565		1950	231	657.581	56.0571	0.0199711	2.10863e+11	2.10863e+11	4.21117e+09	1.41285e-05	50.8626		2450	231	1049.2	70.7571	0.0251285	2.33783e+11	2.33783e+11	5.87459e+09	1.75617e-05	63.2223		2950	231	1518.17	-82.3714	0.0302665	2.56702e+11
1000	241	116.98	20.2714	0.0105127	1.67316e+11	1.67316e+11	1.75894e+09	7.36246e-06	26.5048		1500	241	336.343	39.7714	0.0158348	1.90236e+11	1.90236e+11	3.01235e+09	1.09532e-05	39.4316		1950	241	658.872	55.3286	0.0206398	2.10863e+11	2.10863e+11	4.35218e+09	1.41156e-05	50.8161		2450	241	1050.66	62.9143	0.0259776	2.33783e+11	2.33783e+11	6.07312e+09	1.75394e-05	63.1419		2950	241	1519.87	72.6	0.0312966	2.56702e+11
1000	251	117.553	24.5571	0.0108384	1.67316e+11	1.67316e+11	1.81344e+09	7.35981e-06	26.4953		1500	251	337.324	42.0429	0.0163329	1.90236e+11	1.90236e+11	3.10709e+09	1.09464e-05	39.4072		1950	251	660.082	51.8571	0.0212963	2.10863e+11	2.10863e+11	4.49061e+09	1.41029e-05	50.7706		2450	251	1052.24	67.6714	0.0268123	2.33783e+11	2.33783e+11	6.26825e+09	1.75175e-05	63.063		2950	251	1521.47	68.7	0.0323101	2.56702e+11
1000	261	118.18	26.8714	0.0111573	1.67316e+11	1.67316e+11	1.8668e+09	7.35723e-06	26.486		1500	261	338.171	36.3	0.0168213	1.90236e+11	1.90236e+11	3.20001e+09	1.09398e-05	39.3833		1950	261	661.377	55.5	0.0219409	2.10863e+11	2.10863e+11	4.62653e+09	1.40905e-05	50.7259		2450	261	1053.87	69.5571	0.0276329	2.33783e+11	2.33783e+11	6.46008e+09	1.7496e-05	62.9857		2950	261	1523.16	72.4286	0.0333074	2.56702e+11
1000	271	118.741	24.0429	0.0114696	1.67316e+11	1.67316e+11	1.91905e+09	7.3547e-06	26.4769		1500	271	339.052	37.7571	0.0173004	1.90236e+11	1.90236e+11	3.29115e+09	1.09333e-05	39.3599		1950	271	662.621	53.3143	0.0225741	2.10863e+11	2.10863e+11	4.76004e+09	1.40784e-05	50.6822		2450	271	1050.01	-55.0571	0.0284398	2.33783e+11	2.33783e+11	6.64872e+09	1.7475e-05	62.9099		2950	271	1524.75	68.0143	0.0342891	2.56702e+11
1000	281	119.363	26.6571	0.0117754	1.67316e+11	1.67316e+11	1.97022e+09	7.35222e-06	26.468		1500	281	339.92	37.2	0.0177704	1.90236e+11	1.90236e+11	3.38056e+09	1.09269e-05	39.3369		1950	281	663.905	55.0286	0.0231961	2.10863e+11	2.10863e+11	4.89119e+09	1.40665e-05	50.6393		2450	281	1051.35	57.4286	0.0292335	2.33783e+11	2.33783e+11	6.83427e+09	1.74543e-05	62.8354		2950	281	1526.17	61.1143	0.0352556	2.56702e+11
1000	291	119.983	26.5714	0.0120749	1.67316e+11	1.67316e+11	2.02033e+09	7.3498e-06	26.4593		1500	291	340.894	41.7429	0.0182315	1.90236e+11	1.90236e+11	3.46829e+09	1.09207e-05	39.3144		1950	291	665.152	53.4429	0.0238072	2.10863e+11	2.10863e+11	5.02006e+09	1.40548e-05	50.5972		2450	291	1052.74	59.6571	0.0300143	2.33783e+11	2.33783e+11	7.01682e+09	1.7434e-05	62.7624		2950	291	1527.8	69.8571	0.0362076	2.56702e+11
1000	301	120.645	28.3714	0.0123683	1.67316e+11	1.67316e+11	2.06941e+09	7.34742e-06	26.4507		1500	301	341.795	38.6143	0.0186841	1.90236e+11	1.90236e+11	3.55439e+09	1.09146e-05	39.2924		1950	301	666.423	54.4714	0.0244078	2.10863e+11	2.10863e+11	5.14671e+09	1.40433e-05	50.5559		2450	301	1054.2	62.4	0.0307827	2.33783e+11	2.33783e+11	7.19647e+09	1.74141e-05	62.6906		2950	301	1529.3	64.2	0.0371453	2.56702e+11
1000	311	121.258	26.2714	0.0126556	1.67316e+11	1.67316e+11	2.1175e+09	7.3451e-06	26.4424		1500	311	342.745	40.7143	0.0191284	1.90236e+11	1.90236e+11	3.6389e+09	1.09086e-05	39.2708		1950	311	667.683	54	0.0249982	2.10863e+11	2.10863e+11	5.27121e+09	1.4032e-05	50.5153		2450	311	1055.62	61.0286	0.0315391	2.33783e+11	2.33783e+11	7.37329e+09	1.73945e-05	62.6202		2950	311	1530.95	70.5857	0.0380693	2.56702e+11
1000	321	121.902	27.6	0.0129372	1.67316e+11	1.67316e+11	2.16461e+09	7.34283e-06	26.4342		1500	321	343.737	42.5143	0.0195645	1.90236e+11	1.90236e+11	3.72186e+09	1.09027e-05	39.2496		1950	321	668.933	53.5714	0.0255787	2.10863e+11	2.10863e+11	5.3936e+09	1.4021e-05	50.4755		2450	321	1056.89	54.3857	0.0322837	2.33783e+11	2.33783e+11	7.54737e+09	1.73753e-05	62.551		2950	321	1532.65	72.9857	0.03898	2.56702e+11
1000	331	122.592	29.5714	0.0132131	1.67316e+11	1.67316e+11	2.21077e+09	7.3406e-06	26.4262		1500	331	344.646	38.9571	0.0199926	1.90236e+11	1.90236e+11	3.80331e+09	1.08969e-05	39.2288		1950	331	666.976	-27.9571	0.0261495	2.10863e+11	2.10863e+11	5.51396e+09	1.40101e-05	50.4365		2450	331	1058.24	57.6857	0.033017	2.33783e+11	2.33783e+11	7.71879e+09	1.73564e-05	62.483		2950	331	1534.33	72.0857	0.0398777	2.56702e+11
1000	341	123.099	21.7286	0.0134835	1.67316e+11	1.67316e+11	2.25601e+09	7.33842e-06	26.4183		1500	341	345.621	41.7857	0.0204131	1.90236e+11	1.90236e+11	3.8833e+09	1.08912e-05	39.2084		1950	341	668.017	44.6143	0.0267108	2.10863e+11	2.10863e+11	5.63233e+09	1.39995e-05	50.3981		2450	341	1059.44	51.4714	0.0337392	2.33783e+11	2.33783e+11	7.88763e+09	1.73378e-05	62.4162		2950	341	1536.07	74.4857	0.0407629	2.56702e+11
1000	351	123.794	29.7857	0.0137485	1.67316e+11	1.67316e+11	2.30035e+09	7.33628e-06	26.4106		1500	351	346.578	41.0143	0.0208261	1.90236e+11	1.90236e+11	3.96186e+09	1.08857e-05	39.1884		1950	351	669.248	52.7571	0.0272631	2.10863e+11	2.10863e+11	5.74878e+09	1.3989e-05	50.3604		2450	351	1061.14	72.9857	0.0344506	2.33783e+11	2.33783e+11	8.05394e+09	1.73196e-05	62.3505		2950	351	1537.81	74.6143	0.0416359	2.56702e+11
1000	361	124.364	24.4286	0.0140083	1.67316e+11	1.67316e+11	2.34381e+09	7.33419e-06	26.4031		1500	361	347.561	42.1286	0.0212317	1.90236e+11	1.90236e+11	4.03903e+09	1.08802e-05	39.1688		1950	361	670.398	49.2857	0.0278064	2.10863e+11	2.10863e+11	5.86334e+09	1.39787e-05	50.3234		2450	361	1062.56	60.5571	0.0351515	2.33783e+11	2.33783e+11	8.21781e+09	1.73017e-05	62.286		2950	361	1539.56	75.0857	0.0424971	2.56702e+11
1000	371	124.996	27.0857	0.0142629	1.67316e+11	1.67316e+11	2.38641e+09	7.33214e-06	26.3957		1500	371	348.525	41.3143	0.0216302	1.90236e+11	1.90236e+11	4.11484e+09	1.08749e-05	39.1495		1950	371	671.383	42.2143	0.028341	2.10863e+11	2.10863e+11	5.97607e+09	1.39686e-05	50.287		2450	371	1063.84	55.2429	0.0358423	2.33783e+11	2.33783e+11	8.3793e+09	1.7284e-05	62.2225		2950	371	1541.23	71.4429	0.0433467	2.56702e+11
1000	381	125.581	25.0714	0.0145125	1.67316e+11	1.67316e+11	2.42818e+09	7.33013e-06	26.3885		1500	381	349.405	37.7143	0.0220218	1.90236e+11	1.90236e+11	4.18933e+09	1.08696e-05	39.1306		1950	381	672.432	44.9571	0.0288672	2.10863e+11	2.10863e+11	6.08702e+09	1.39587e-05	50.2513		2450	381	1064.97	48.0429	0.0365231	2.33783e+11	2.33783e+11	8.53847e+09	1.72667e-05	62.16		2950	381	1542.89	71.2286	0.0441851	2.56702e+11
1000	391	126.157	24.6857	0.0147573	1.67316e+11	1.67316e+11	2.46913e+09	7.32816e-06	26.3814		1500	391	350.46	45.2143	0.0224066	1.90236e+11	1.90236e+11	4.26253e+09	1.08645e-05	39.112		1950	391	673.569	48.7286	0.0293851	2.10863e+11	2.10863e+11	6.19623e+09	1.39489e-05	50.2162		2450	391	1066.46	64.1571	0.0371943	2.33783e+11	2.33783e+11	8.69539e+09	1.72496e-05	62.0985		2950	391	1544.71	77.8286	0.0450127	2.56702e+11
1000	401	126.802	27.6429	0.0149973	1.67316e+11	1.67316e+11	2.50929e+09	7.32623e-06	26.3744		1500	401	351.369	38.9571	0.0227847	1.90236e+11	1.90236e+11	4.33447e+09	1.08594e-05	39.0938		1950	401	674.62	45.0429	0.029895	2.10863e+11	2.10863e+11	6.30375e+09	1.39393e-05	50.1816		2450	401	1067.89	61.1143	0.0378561	2.33783e+11	2.33783e+11	8.85011e+09	1.72328e-05	62.038		2950	401	1546.36	70.6714	0.0458296	2.56702e+11
1000	411	127.392	25.2857	0.0152327	1.67316e+11	1.67316e+11	2.54867e+09	7.32434e-06	26.3676		1500	411	352.335	41.4	0.0231564	1.90236e+11	1.90236e+11	4.40518e+09	1.08544e-05	39.0759		1950	411	675.625	43.0714	0.030397	2.10863e+11	2.10863e+11	6.40961e+09	1.39299e-05	50.1477		2450	411	1069.35	62.7	0.0385088	2.33783e+11	2.33783e+11	9.00268e+09	1.72163e-05	61.9785		2950	411	1548.12	75.3429	0.0466362	2.56702e+11
1000	421	127.941	23.5286	0.0154635	1.67316e+11	1.67316e+11	2.5873e+09	7.32249e-06	26.361		1500	421	353.32	42.2143	0.0235219	1.90236e+11	1.90236e+11	4.4747e+09	1.08495e-05	39.0583		1950	421	676.589	41.3143	0.0308914	2.10863e+11	2.10863e+11	6.51386e+09	1.39206e-05	50.1143		2450	421	1070.85	64.1143	0.0391525	2.33783e+11	2.33783e+11	9.15317e+09	1.72e-05	61.9199		2950	421	1549.83	73.3286	0.0474327	2.56702e+11
1000	431	128.617	28.9714	0.0156899	1.67316e+11	1.67316e+11	2.62518e+09	7.32067e-06	26.3544		1500	431	354.245	39.6429	0.0238811	1.90236e+11	1.90236e+11	4.54304e+09	1.08447e-05	39.041		1950	431	677.982	59.7	0.0313783	2.10863e+11	2.10863e+11	6.61653e+09	1.39115e-05	50.0814		2450	431	1072.29	61.9714	0.0397875	2.33783e+11	2.33783e+11	9.30162e+09	1.71839e-05	61.8622		2950	431	1551.61	76.3286	0.0482194	2.56702e+11
1000	441	129.166	23.5286	0.015912	1.67316e+11	1.67316e+11	2.66234e+09	7.31889e-06	26.348		1500	441	354.255	0.142857	0.0242344	1.90236e+11	1.90236e+11	4.61024e+09	1.084e-05	39.0241		1950	441	679.046	45.6	0.031858	2.10863e+11	2.10863e+11	6.71767e+09	1.39025e-05	50.0491		2450	441	1073.7	60.1286	0.040414	2.33783e+11	2.33783e+11	9.44808e+09	1.71682e-05	61.8054		2950	441	1553.35	74.7429	0.0489966	2.56702e+11
1000	451	129.775	26.1	0.0161299	1.67316e+11	1.67316e+11	2.69879e+09	7.31714e-06	26.3417		1500	451	355.068	34.8429	0.0245818	1.90236e+11	1.90236e+11	4.67633e+09	1.08354e-05	39.0074		1950	451	680.255	51.8143	0.0323305	2.10863e+11	2.10863e+11	6.81731e+09	1.38937e-05	50.0173		2450	451	1075.12	61.2	0.0410322	2.33783e+11	2.33783e+11	9.59261e+09	1.71526e-05	61.7494		2950	451	1555.12	75.7286	0.0497644	2.56702e+11
1000	461	130.458	29.2714	0.0163436	1.67316e+11	1.67316e+11	2.73456e+09	7.31543e-06	26.3355		1500	461	355.965	38.4429	0.0249234	1.90236e+11	1.90236e+11	4.74133e+09	1.08308e-05	38.991		1950	461	681.225	41.5714	0.0327961	2.10863e+11	2.10863e+11	6.91549e+09	1.3885e-05	49.986		2450	461	1076.6	63.3	0.0416423	2.33783e+11	2.33783e+11	9.73524e+09	1.71373e-05	61.6943		2950	461	1556.89	76.0286	0.0505232	2.56702e+11
1000	471	131.068	26.1429	0.0165534	1.67316e+11	1.67316e+11	2.76965e+09	7.31375e-06	26.3295		1500	471	356.816	36.4714	0.0252595	1.90236e+11	1.90236e+11	4.80526e+09	1.08264e-05	38.9749		1950	471	682.103	37.6286	0.0332549	2.10863e+11	2.10863e+11	7.01223e+09	1.38764e-05	49.9552		2450	471	1077.98	58.9286	0.0422445	2.33783e+11	2.33783e+11	9.87603e+09	1.71222e-05	61.6399		2950	471	1558.63	74.6571	0.0512731	2.56702e+11
1000	481	131.712	27.6	0.0167592	1.67316e+11	1.67316e+11	2.80408e+09	7.3121e-06	26.3236		1500	481	357.728	39.0857	0.0255901	1.90236e+11	1.90236e+11	4.86815e+09	1.0822e-05	38.9591		1950	481	683.22	47.8714	0.0337071	2.10863e+11	2.10863e+11	7.10758e+09	1.3868e-05	49.9249		2450	481	1079.58	68.5286	0.042839	2.33783e+11	2.33783e+11	1.0015e+10	1.71073e-05	61.5864		2950	481	1560.46	78.1714	0.0520143	2.56702e+11
1000	491	132.335	26.7	0.0169611	1.67316e+11	1.67316e+11	2.83788e+09	7.31048e-06	26.3177		1500	491	358.487	32.5286	0.0259154	1.90236e+11	1.90236e+11	4.93003e+09	1.08176e-05	38.9435		1950	491	684.419	51.3857	0.0341528	2.10863e+11	2.10863e+11	7.20156e+09	1.38597e-05	49.895		2450	491	1081.03	62.4429	0.0434259	2.33783e+11	2.33783e+11	1.01522e+10	1.70927e-05	61.5336		2950	491	1562.23	75.7714	0.0527471	2.56702e+11
1000	501	132.937	25.8	0.0171593	1.67316e+11	1.67316e+11	2.87104e+09	7.3089e-06	26.312		1500	501	359.338	36.4714	0.0262354	1.90236e+11	1.90236e+11	4.99091e+09	1.08134e-05	38.9282		1950	501	685.558	48.8143	0.0345921	2.10863e+11	2.10863e+11	7.2942e+09	1.38516e-05	49.8656		2450	501	1082.52	63.5571	0.0440055	2.33783e+11	2.33783e+11	1.02877e+10	1.70782e-05	61.4816		2950	501	1563.93	72.9857	0.0534716	2.56702e+11
1000	511	133.565	26.9143	0.0173539	1.67316e+11	1.67316e+11	2.90358e+09	7.30734e-06	26.3064		1500	511	360.136	34.2	0.0265503	1.90236e+11	1.90236e+11	5.05081e+09	1.08092e-05	38.9132		1950	511	686.745	50.8714	0.0350253	2.10863e+11	2.10863e+11	7.38554e+09	1.38435e-05	49.8367		2450	511	1084.02	64.4143	0.0445779	2.33783e+11	2.33783e+11	1.04215e+10	1.7064e-05	61.4303		2950	511	1565.58	70.6714	0.054188	2.56702e+11
1000	521	134.264	29.9571	0.0175448	1.67316e+11	1.67316e+11	2.93553e+09	7.30581e-06	26.3009		1500	521	361.007	37.3286	0.0268602	1.90236e+11	1.90236e+11	5.10977e+09	1.08051e-05	38.8984		1950	521	687.906	49.7571	0.0354524	2.10863e+11	2.10863e+11	7.4756e+09	1.38356e-05	49.8082		2450	521	1085.46	61.9286	0.0451433	2.33783e+11	2.33783e+11	1.05537e+10	1.70499e-05	61.3798		2950	521	1568.53	42.2143	0.0548966	2.56702e+11
1000	531	134.858	25.4571	0.0177322	1.67316e+11	1.67316e+11	2.96689e+09	7.30432e-06	26.2955		1500	531	361.904	38.4429	0.0271652	1.90236e+11	1.90236e+11	5.16779e+09	1.08011e-05	38.8838		1950	531	689.079	50.2714	0.0358736	2.10863e+11	2.10863e+11	7.56441e+09	1.38278e-05	49.7801		2450	531	1086.97	64.3714	0.0457017	2.33783e+11	2.33783e+11	1.06843e+10	1.70361e-05	61.3299		2950	531	1570.05	64.9714	0.0555974	2.56702e+11
1000	541	135.458	25.7143	0.0179162	1.67316e+11	1.67316e+11	2.99768e+09	7.30285e-06	26.2902		1500	541	362.727	35.2714	0.0274654	1.90236e+11	1.90236e+11	5.2249e+09	1.07971e-05	38.8695		1950	541	690.221	48.9429	0.0362889	2.10863e+11	2.10863e+11	7.652e+09	1.38201e-05	49.7525		2450	541	1088.47	64.4571	0.0462534	2.33783e+11	2.33783e+11	1.08132e+10	1.70224e-05	61.2807		2950	541	1571.89	79.0714	0.0562907	2.56702e+11
1000	551	136.07	26.2286	0.0180968	1.67316e+11	1.67316e+11	3.0279e+09	7.3014e-06	26.2851		1500	551	363.487	32.5714	0.027761	1.90236e+11	1.90236e+11	5.28113e+09	1.07932e-05	38.8555		1950	551	691.369	49.2	0.0366987	2.10863e+11	2.10863e+11	7.73839e+09	1.38126e-05	49.7252		2450	551	1089.94	63.1286	0.0467986	2.33783e+11	2.33783e+11	1.09407e+10	1.70089e-05	61.2322		2950	551	1573.43	65.6571	0.0569767	2.56702e+11
1000	561	136.734	28.4571	0.0182742	1.67316e+11	1.67316e+11	3.05757e+09	7.29999e-06	26.28		1500	561	364.64	49.4143	0.0280519	1.90236e+11	1.90236e+11	5.33647e+09	1.07893e-05	38.8416		1950	561	692.491	48.0857	0.0371028	2.10863e+11	2.10863e+11	7.82361e+09	1.38051e-05	49.6984		2450	561	1091.47	65.4	0.0473372	2.33783e+11	2.33783e+11	1.10666e+10	1.69956e-05	61.1843		2950	561	1574.76	57.3	0.0576554	2.56702e+11
1000	571	137.37	27.2571	0.0184483	1.67316e+11	1.67316e+11	3.08671e+09	7.2986e-06	26.275		1500	571	365.468	35.4857	0.0283384	1.90236e+11	1.90236e+11	5.39097e+09	1.07856e-05	38.828		1950	571	693.697	51.6857	0.0375015	2.10863e+11	2.10863e+11	7.90769e+09	1.37978e-05	49.6719		2450	571	1092.95	63.6	0.0478696	2.33783e+11	2.33783e+11	1.11911e+10	1.69825e-05	61.1371		2950	571	1576.21	62.0571	0.0583271	2.56702e+11
1000	581	137.903	22.8429	0.0186193	1.67316e+11	1.67316e+11	3.11531e+09	7.29724e-06	26.27		1500	581	366.289	35.1857	0.0286204	1.90236e+11	1.90236e+11	5.44463e+09	1.07818e-05	38.8146		1950	581	694.785	46.6286	0.0378949	2.10863e+11	2.10863e+11	7.99063e+09	1.37905e-05	49.6458		2450	581	1094.44	63.8571	0.0483958	2.33783e+11	2.33783e+11	1.13141e+10	1.69696e-05	61.0904		2950	581	1577.84	69.9857	0.0589918	2.56702e+11
1000	591	138.604	30.0429	0.0187872	1.67316e+11	1.67316e+11	3.14341e+09	7.2959e-06	26.2652		1500	591	367.208	39.3857	0.0288982	1.90236e+11	1.90236e+11	5.49746e+09	1.07782e-05	38.8014		1950	591	696.016	52.7571	0.038283	2.10863e+11	2.10863e+11	8.07248e+09	1.37834e-05	49.6201		2450	591	1106.65	174.457	0.0489159	2.33783e+11	2.33783e+11	1.14357e+10	1.69568e-05	61.0444		2950	591	1579.48	70.0286	0.0596498	2.56702e+11
1000	601	139.264	28.2857	0.0189521	1.67316e+11	1.67316e+11	3.171e+09	7.29458e-06	26.2605		1500	601	367.998	33.8571	0.0291717	1.90236e+11	1.90236e+11	5.5495e+09	1.07746e-05	38.7884		1950	601	697.179	49.8429	0.0386661	2.10863e+11	2.10863e+11	8.15325e+09	1.37763e-05	49.5948		2450	601	1108.07	60.8571	0.0494301	2.33783e+11	2.33783e+11	1.15559e+10	1.69442e-05	60.999		2950	601	1581.08	68.5286	0.0603012	2.56702e+11
1000	611	139.878	26.3143	0.019114	1.67316e+11	1.67316e+11	3.19809e+09	7.29329e-06	26.2559		1500	611	368.791	33.9857	0.0294411	1.90236e+11	1.90236e+11	5.60075e+09	1.0771e-05	38.7756		1950	611	698.374	51.2143	0.0390441	2.10863e+11	2.10863e+11	8.23296e+09	1.37694e-05	49.5698		2450	611	1109.43	58.0286	0.0499384	2.33783e+11	2.33783e+11	1.16747e+10	1.69317e-05	60.9542		2950	611	1582.71	69.9	0.060946	2.56702e+11
1000	621	140.489	26.1857	0.0192731	1.67316e+11	1.67316e+11	3.2247e+09	7.29203e-06	26.2513		1500	621	369.482	29.6143	0.0297064	1.90236e+11	1.90236e+11	5.65123e+09	1.07675e-05	38.7631		1950	621	699.536	49.8	0.0394172	2.10863e+11	2.10863e+11	8.31164e+09	1.37625e-05	49.5452		2450	621	1110.82	59.6571	0.0504411	2.33783e+11	2.33783e+11	1.17923e+10	1.69194e-05	60.9099		2950	621	1584.3	68.0571	0.0615845	2.56702e+11
1000	631	141.121	27.0857	0.0194293	1.67316e+11	1.67316e+11	3.25084e+09	7.29078e-06	26.2468		1500	631	370.319	35.8714	0.0299678	1.90236e+11	1.90236e+11	5.70095e+09	1.07641e-05	38.7507		1950	631	700.744	51.7714	0.0397855	2.10863e+11	2.10863e+11	8.3893e+09	1.37558e-05	49.5209		2450	631	1112.15	56.8714	0.0509382	2.33783e+11	2.33783e+11	1.19085e+10	1.69073e-05	60.8662		2950	631	1585.87	67.5429	0.0622168	2.56702e+11
1000	641	141.765	27.6	0.0195828	1.67316e+11	1.67316e+11	3.27652e+09	7.28956e-06	26.2424		1500	641	371.218	38.5286	0.0302253	1.90236e+11	1.90236e+11	5.74993e+09	1.07607e-05	38.7385		1950	641	701.934	51	0.0401491	2.10863e+11	2.10863e+11	8.46597e+09	1.37491e-05	49.4969		2450	641	1113.47	56.5714	0.0514298	2.33783e+11	2.33783e+11	1.20234e+10	1.68953e-05	60.823		2950	641	1587.49	69.3857	0.062843	2.56702e+11
1000	651	142.386	26.6143	0.0197335	1.67316e+11	1.67316e+11	3.30174e+09	7.28836e-06	26.2381		1500	651	372.076	36.7714	0.030479	1.90236e+11	1.90236e+11	5.79819e+09	1.07574e-05	38.7265		1950	651	703.141	51.7286	0.040508	2.10863e+11	2.10863e+11	8.54166e+09	1.37426e-05	49.4733		2450	651	1114.82	57.7714	0.051916	2.33783e+11	2.33783e+11	1.21371e+10	1.68834e-05	60.7804		2950	651	1589.18	72.2143	0.0634631	2.56702e+11
1000	661	142.522	1.94286	0.0198816	1.67316e+11	1.67316e+11	3.32652e+09	7.28718e-06	26.2339		1500	661	373.001	39.6429	0.0307289	1.90236e+11	1.90236e+11	5.84574e+09	1.07541e-05	38.7147		1950	661	704.29	49.2429	0.0408625	2.10863e+11	2.10863e+11	8.61639e+09	1.37361e-05	49.45		2450	661	1116.12	56.0571	0.052397	2.33783e+11	2.33783e+11	1.22495e+10	1.68717e-05	60.7382		2950	661	1590.84	71.4429	0.0640774	2.56702e+11
1000	671	143.133	26.1857	0.0200271	1.67316e+11	1.67316e+11	3.35086e+09	7.28603e-06	26.2297		1500	671	373.912	39.0429	0.0309752	1.90236e+11	1.90236e+11	5.89259e+09	1.07508e-05	38.7031		1950	671	705.526	52.9714	0.0412124	2.10863e+11	2.10863e+11	8.69018e+09	1.37297e-05	49.427		2450	671	1117.51	59.3143	0.0528728	2.33783e+11	2.33783e+11	1.23607e+10	1.68602e-05	60.6966		2950	671	1592.55	73.2857	0.064686	2.56702e+11
1000	681	143.687	23.7429	0.02017	1.67316e+11	1.67316e+11	3.37477e+09	7.28489e-06	26.2256		1500	681	374.809	38.4429	0.0312179	1.90236e+11	1.90236e+11	5.93875e+09	1.07477e-05	38.6916		1950	681	706.763	53.0143	0.041558	2.10863e+11	2.10863e+11	8.76305e+09	1.37234e-05	49.4043		2450	681	1118.85	57.6	0.0533435	2.33783e+11	2.33783e+11	1.24708e+10	1.68488e-05	60.6555		2950	681	1594.24	72.2143	0.0652888	2.56702e+11
1000	691	144.274	25.1571	0.0203105	1.67316e+11	1.67316e+11	3.39827e+09	7.28377e-06	26.2216		1500	691	375.678	37.2429	0.031457	1.90236e+11	1.90236e+11	5.98425e+09	1.07445e-05	38.6803		1950	691	707.953	51	0.0418993	2.10863e+11	2.10863e+11	8.83501e+09	1.37172e-05	49.3819		2450	691	1120.24	59.3571	0.0538093	2.33783e+11	2.33783e+11	1.25797e+10	1.68375e-05	60.6149		2950	691	1595.96	73.7143	0.0658862	2.56702e+11
1000	701	144.664	16.7143	0.0204485	1.67316e+11	1.67316e+11	3.42136e+09	7.28268e-06	26.2176		1500	701	376.602	39.6	0.0316927	1.90236e+11	1.90236e+11	6.02908e+09	1.07414e-05	38.6692		1950	701	709.243	55.2857	0.0422364	2.10863e+11	2.10863e+11	8.90609e+09	1.37111e-05	49.3598		2450	701	1121.66	60.9	0.0542702	2.33783e+11	2.33783e+11	1.26874e+10	1.68263e-05	60.5747		2950	701	1597.61	70.7143	0.066478	2.56702e+11
1000	711	145.191	22.5857	0.020584	1.67316e+11	1.67316e+11	3.44405e+09	7.2816e-06	26.2138		1500	711	377.467	37.0714	0.031925	1.90236e+11	1.90236e+11	6.07327e+09	1.07384e-05	38.6583		1950	711	718.764	136.014	0.0425693	2.10863e+11	2.10863e+11	8.9763e+09	1.3705e-05	49.338		2450	711	1123.07	60.3857	0.0547262	2.33783e+11	2.33783e+11	1.2794e+10	1.68153e-05	60.5351		2950	711	1599.27	71.3143	0.0670646	2.56702e+11
1000	721	145.738	23.4429	0.0207173	1.67316e+11	1.67316e+11	3.46634e+09	7.28054e-06	26.21		1500	721	378.352	37.9286	0.0321539	1.90236e+11	1.90236e+11	6.11682e+09	1.07354e-05	38.6475		1950	721	719.887	48.1286	0.0428982	2.10863e+11	2.10863e+11	9.04565e+09	1.3699e-05	49.3165		2450	721	1124.53	62.5714	0.0551776	2.33783e+11	2.33783e+11	1.28996e+10	1.68044e-05	60.4959		2950	721	1601.09	78.0429	0.0676458	2.56702e+11
1000	731	146.31	24.5143	0.0208482	1.67316e+11	1.67316e+11	3.48825e+09	7.2795e-06	26.2062		1500	731	379.214	36.9429	0.0323796	1.90236e+11	1.90236e+11	6.15976e+09	1.07325e-05	38.6368		1950	731	720.942	45.2143	0.0432231	2.10863e+11	2.10863e+11	9.11416e+09	1.36931e-05	49.2953		2450	731	1125.93	60	0.0556243	2.33783e+11	2.33783e+11	1.3004e+10	1.67936e-05	60.4571		2950	731	1602.77	71.9571	0.0682219	2.56702e+11
1000	741	146.857	23.4429	0.0209769	1.67316e+11	1.67316e+11	3.50978e+09	7.27848e-06	26.2025		1500	741	380.07	36.6857	0.0326021	1.90236e+11	1.90236e+11	6.20208e+09	1.07295e-05	38.6264		1950	741	722.056	47.7429	0.0435441	2.10863e+11	2.10863e+11	9.18184e+09	1.36873e-05	49.2743		2450	741	1127.34	60.3857	0.0560665	2.33783e+11	2.33783e+11	1.31074e+10	1.6783e-05	60.4188		2950	741	1604.5	74.1429	0.068793	2.56702e+11
1000	751	147.396	23.1	0.0211034	1.67316e+11	1.67316e+11	3.53094e+09	7.27748e-06	26.1989		1500	751	380.951	37.7571	0.0328214	1.90236e+11	1.90236e+11	6.2438e+09	1.07267e-05	38.6161		1950	751	723.112	45.2571	0.0438612	2.10863e+11	2.10863e+11	9.24872e+09	1.36816e-05	49.2536		2450	751	1128.71	58.9714	0.0565042	2.33783e+11	2.33783e+11	1.32097e+10	1.67725e-05	60.3809		2950	751	1606.2	72.7286	0.0693591	2.56702e+11
1000	761	147.955	23.9571	0.0212277	1.67316e+11	1.67316e+11	3.55174e+09	7.27649e-06	26.1954		1500	761	381.86	38.9571	0.0330376	1.90236e+11	1.90236e+11	6.28494e+09	1.07239e-05	38.6059		1950	761	724.195	46.4143	0.0441746	2.10863e+11	2.10863e+11	9.3148e+09	1.36759e-05	49.2332		2450	761	1130.24	65.4857	0.0569376	2.33783e+11	2.33783e+11	1.3311e+10	1.67621e-05	60.3434		2950	761	1601.14	-72.2857	0.0699203	2.56702e+11
1000	771	148.504	23.5286	0.0213499	1.67316e+11	1.67316e+11	3.57218e+09	7.27553e-06	26.1919		1500	771	382.783	39.5571	0.0332508	1.90236e+11	1.90236e+11	6.3255e+09	1.07211e-05	38.5959		1950	771	725.298	47.2714	0.0444843	2.10863e+11	2.10863e+11	9.38009e+09	1.36703e-05	49.213		2450	771	1131.67	61.2	0.0573666	2.33783e+11	2.33783e+11	1.34113e+10	1.67518e-05	60.3064		2950	771	1602.75	69.1714	0.0704766	2.56702e+11
1000	781	149.073	24.3857	0.02147	1.67316e+11	1.67316e+11	3.59228e+09	7.27457e-06	26.1885		1500	781	383.627	36.1714	0.033461	1.90236e+11	1.90236e+11	6.36548e+09	1.07183e-05	38.586		1950	781	726.389	46.7571	0.0447903	2.10863e+11	2.10863e+11	9.44462e+09	1.36648e-05	49.1931		2450	781	1133.14	63.2143	0.0577914	2.33783e+11	2.33783e+11	1.35106e+10	1.67416e-05	60.2698		2950	781	1604.38	69.6857	0.0710283	2.56702e+11
1000	791	149.721	27.7714	0.021588	1.67316e+11	1.67316e+11	3.61203e+09	7.27364e-06	26.1851		1500	791	384.579	40.8	0.0336683	1.90236e+11	1.90236e+11	6.40492e+09	1.07156e-05	38.5763		1950	791	727.478	46.6714	0.0450927	2.10863e+11	2.10863e+11	9.50839e+09	1.36593e-05	49.1734		2450	791	1134.57	61.2429	0.058212	2.33783e+11	2.33783e+11	1.3609e+10	1.67315e-05	60.2336		2950	791	1605.99	68.8286	0.0715753	2.56702e+11
1000	801	150.28	23.9571	0.021704	1.67316e+11	1.67316e+11	3.63144e+09	7.27272e-06	26.1818		1500	801	385.523	40.4571	0.0338727	1.90236e+11	1.90236e+11	6.4438e+09	1.0713e-05	38.5667		1950	801	728.642	49.8857	0.0453916	2.10863e+11	2.10863e+11	9.57142e+09	1.36539e-05	49.154		2450	801	1130.41	-59.5143	0.0586285	2.33783e+11	2.33783e+11	1.37063e+10	1.67216e-05	60.1977		2950	801	1607.6	69.0857	0.0721178	2.56702e+11
1000	811	150.656	16.1143	0.0218181	1.67316e+11	1.67316e+11	3.65053e+09	7.27182e-06	26.1785		1500	811	386.437	39.1714	0.0340743	1.90236e+11	1.90236e+11	6.48215e+09	1.07103e-05	38.5572		1950	811	729.76	47.9143	0.0456871	2.10863e+11	2.10863e+11	9.63372e+09	1.36486e-05	49.1348		2450	811	1131.85	61.8429	0.059041	2.33783e+11	2.33783e+11	1.38028e+10	1.67117e-05	60.1623		2950	811	1609.04	61.6286	0.0726557	2.56702e+11
1000	821	151.205	23.5286	0.0219302	1.67316e+11	1.67316e+11	3.66929e+09	7.27093e-06	26.1753		1500	821	387.315	37.6286	0.0342731	1.90236e+11	1.90236e+11	6.51997e+09	1.07078e-05	38.5479		1950	821	730.815	45.2143	0.0459791	2.10863e+11	2.10863e+11	9.6953e+09	1.36433e-05	49.1159		2450	821	1133.23	59.1857	0.0594496	2.33783e+11	2.33783e+11	1.38983e+10	1.6702e-05	60.1272		2950	821	1610.8	75.5571	0.0731893	2.56702e+11
1000	831	151.678	20.2714	0.0220405	1.67316e+11	1.67316e+11	3.68774e+09	7.27006e-06	26.1722		1500	831	388.259	40.4571	0.0344692	1.90236e+11	1.90236e+11	6.55727e+09	1.07052e-05	38.5387		1950	831	731.937	48.0857	0.0462678	2.10863e+11	2.10863e+11	9.75618e+09	1.36381e-05	49.0972		2450	831	1134.61	59.1	0.0598542	2.33783e+11	2.33783e+11	1.39929e+10	1.66924e-05	60.0925		2950	831	1612.32	65.3143	0.0737185	2.56702e+11
1000	841	152.207	22.6714	0.0221489	1.67316e+11	1.67316e+11	3.70587e+09	7.2692e-06	26.1691		1500	841	389.171	39.0857	0.0346626	1.90236e+11	1.90236e+11	6.59406e+09	1.07027e-05	38.5297		1950	841	733.05	47.7	0.0465532	2.10863e+11	2.10863e+11	9.81636e+09	1.3633e-05	49.0787		2450	841	1136.01	59.8714	0.0602551	2.33783e+11	2.33783e+11	1.40866e+10	1.66828e-05	60.0582		2950	841	1613.97	70.7571	0.0742434	2.56702e+11
1000	851	152.738	22.7571	0.0222555	1.67316e+11	1.67316e+11	3.7237e+09	7.26835e-06	26.1661		1500	851	390.104	39.9857	0.0348533	1.90236e+11	1.90236e+11	6.63035e+09	1.07002e-05	38.5208		1950	851	734.092	44.6571	0.0468354	2.10863e+11	2.10863e+11	9.87586e+09	1.36279e-05	49.0604		2450	851	1137.22	52.1571	0.0606521	2.33783e+11	2.33783e+11	1.41794e+10	1.66734e-05	60.0243		2950	851	1615.39	60.8143	0.0747641	2.56702e+11
1000	861	153.245	21.7286	0.0223602	1.67316e+11	1.67316e+11	3.74123e+09	7.26753e-06	26.1631		1500	861	391.002	38.4857	0.0350415	1.90236e+11	1.90236e+11	6.66614e+09	1.06978e-05	38.512		1950	861	735.23	48.7714	0.0471144	2.10863e+11	2.10863e+11	9.93469e+09	1.36229e-05	49.0424		2450	861	1138.51	55.2857	0.0610454	2.33783e+11	2.33783e+11	1.42714e+10	1.66641e-05	59.9907		2950	861	1616.89	64.2	0.0752807	2.56702e+11
1000	871	153.839	25.4571	0.0224633	1.67316e+11	1.67316e+11	3.75847e+09	7.26671e-06	26.1602		1500	871	391.935	39.9857	0.0352271	1.90236e+11	1.90236e+11	6.70146e+09	1.06954e-05	38.5033		1950	871	736.315	46.5	0.0473902	2.10863e+11	2.10863e+11	9.99285e+09	1.36179e-05	49.0245		2450	871	1139.65	48.8571	0.0614351	2.33783e+11	2.33783e+11	1.43625e+10	1.66548e-05	59.9574		2950	871	1618.58	72.3429	0.0757932	2.56702e+11
1000	881	154.34	21.4714	0.0225646	1.67316e+11	1.67316e+11	3.77542e+09	7.26591e-06	26.1573		1500	881	392.817	37.8	0.0354102	1.90236e+11	1.90236e+11	6.73629e+09	1.0693e-05	38.4947		1950	881	737.481	49.9714	0.047663	2.10863e+11	2.10863e+11	1.00504e+10	1.3613e-05	49.0069		2450	881	1141	57.5571	0.0618212	2.33783e+11	2.33783e+11	1.44527e+10	1.66457e-05	59.9245		2950	881	1620.29	73.2429	0.0763017	2.56702e+11
1000	891	154.974	27.1714	0.0226642	1.67316e+11	1.67316e+11	3.79209e+09	7.26512e-06	26.1544		1500	891	393.761	40.4571	0.0355909	1.90236e+11	1.90236e+11	6.77066e+09	1.06906e-05	38.4863		1950	891	738.657	50.4	0.0479327	2.10863e+11	2.10863e+11	1.01072e+10	1.36082e-05	48.9895		2450	891	1142.32	56.6143	0.0622038	2.33783e+11	2.33783e+11	1.45422e+10	1.66366e-05	59.8919		2950	891	1622.02	74.1857	0.0768062	2.56702e+11
1000	901	155.543	24.3857	0.0227622	1.67316e+11	1.67316e+11	3.80848e+09	7.26435e-06	26.1517		1500	901	394.709	40.6286	0.0357692	1.90236e+11	1.90236e+11	6.80457e+09	1.06883e-05	38.478		1950	901	739.786	48.3857	0.0481995	2.10863e+11	2.10863e+11	1.01635e+10	1.36034e-05	48.9723		2450	901	1143.7	59.4	0.0625828	2.33783e+11	2.33783e+11	1.46308e+10	1.66277e-05	59.8597		2950	901	1623.65	69.9429	0.0773069	2.56702e+11
1000	911	156.129	25.1143	0.0228585	1.67316e+11	1.67316e+11	3.8246e+09	7.26359e-06	26.1489		1500	911	407.269	179.429	0.035945	1.90236e+11	1.90236e+11	6.83803e+09	1.0686e-05	38.4697		1950	911	740.958	50.2286	0.0484633	2.10863e+11	2.10863e+11	1.02191e+10	1.35987e-05	48.9553		2450	911	1145.08	58.9286	0.0629585	2.33783e+11	2.33783e+11	1.47186e+10	1.66188e-05	59.8278		2950	911	1625.31	71.2286	0.0778037	2.56702e+11
1000	921	156.753	26.7429	0.0229532	1.67316e+11	1.67316e+11	3.84045e+09	7.26284e-06	26.1462		1500	921	407.846	24.7286	0.0361185	1.90236e+11	1.90236e+11	6.87104e+09	1.06838e-05	38.4617		1950	921	742.108	49.2857	0.0487242	2.10863e+11	2.10863e+11	1.02741e+10	1.3594e-05	48.9385		2450	921	1146.57	64.0286	0.0633307	2.33783e+11	2.33783e+11	1.48056e+10	1.66101e-05	59.7962		2950	921	1626.94	69.6857	0.0782968	2.56702e+11
1000	931	157.293	23.1429	0.0230464	1.67316e+11	1.67316e+11	3.85604e+09	7.2621e-06	26.1436		1500	931	408.657	34.7571	0.0362898	1.90236e+11	1.90236e+11	6.90361e+09	1.06816e-05	38.4537		1950	931	743.286	50.4857	0.0489823	2.10863e+11	2.10863e+11	1.03286e+10	1.35894e-05	48.9219		2450	931	1147.99	60.9857	0.0636997	2.33783e+11	2.33783e+11	1.48919e+10	1.66014e-05	59.7649		2950	931	1628.66	73.6714	0.0787861	2.56702e+11
1000	941	157.913	26.5714	0.023138	1.67316e+11	1.67316e+11	3.87137e+09	7.26138e-06	26.141		1500	941	409.478	35.1857	0.0364587	1.90236e+11	1.90236e+11	6.93576e+09	1.06794e-05	38.4458		1950	941	744.496	51.8571	0.0492376	2.10863e+11	2.10863e+11	1.03824e+10	1.35849e-05	48.9055		2450	941	1149.42	61.2857	0.0640653	2.33783e+11	2.33783e+11	1.49774e+10	1.65928e-05	59.7339		2950	941	1630.37	73.2429	0.0792718	2.56702e+11
1000	951	158.489	24.6857	0.0232281	1.67316e+11	1.67316e+11	3.88645e+09	7.26067e-06	26.1384		1500	951	410.335	36.7286	0.0366255	1.90236e+11	1.90236e+11	6.96748e+09	1.06772e-05	38.438		1950	951	745.641	49.0714	0.0494901	2.10863e+11	2.10863e+11	1.04356e+10	1.35803e-05	48.8892		2450	951	1150.92	64.2	0.0644278	2.33783e+11	2.33783e+11	1.50621e+10	1.65842e-05	59.7033		2950	951	1632.13	75.6429	0.0797539	2.56702e+11
1000	961	159.1	26.1857	0.0233168	1.67316e+11	1.67316e+11	3.90128e+09	7.25997e-06	26.1359		1500	961	411.13	34.0714	0.03679	1.90236e+11	1.90236e+11	6.99878e+09	1.06751e-05	38.4304		1950	961	746.822	50.6143	0.0497399	2.10863e+11	2.10863e+11	1.04883e+10	1.35759e-05	48.8732		2450	961	1152.33	60.4714	0.064787	2.33783e+11	2.33783e+11	1.51461e+10	1.65758e-05	59.6729		2950	961	1633.87	74.5714	0.0802324	2.56702e+11
1000	971	159.666	24.2571	0.023404	1.67316e+11	1.67316e+11	3.91586e+09	7.25928e-06	26.1334		1500	971	411.973	36.1286	0.0369524	1.90236e+11	1.90236e+11	7.02967e+09	1.0673e-05	38.4228		1950	971	747.925	47.2714	0.049987	2.10863e+11	2.10863e+11	1.05404e+10	1.35715e-05	48.8573		2450	971	1153.82	63.7714	0.0651431	2.33783e+11	2.33783e+11	1.52293e+10	1.65675e-05	59.6429		2950	971	1635.59	73.4571	0.0807074	2.56702e+11
1000	981	160.343	29.0143	0.0234897	1.67316e+11	1.67316e+11	3.93021e+09	7.2586e-06	26.131		1500	981	412.802	35.5286	0.0371127	1.90236e+11	1.90236e+11	7.06016e+09	1.06709e-05	38.4153		1950	981	749.205	54.8571	0.0502315	2.10863e+11	2.10863e+11	1.0592e+10	1.35671e-05	48.8416		2450	981	1155.2	58.9286	0.0654962	2.33783e+11	2.33783e+11	1.53119e+10	1.65592e-05	59.6131		2950	981	1637.18	68.2286	0.081179	2.56702e+11
1000	991	160.895	23.6571	0.023574	1.67316e+11	1.67316e+11	3.94432e+09	7.25794e-06	26.1286		1500	991	413.647	36.2143	0.0372709	1.90236e+11	1.90236e+11	7.09026e+09	1.06689e-05	38.408		1950	991	750.375	50.1429	0.0504734	2.10863e+11	2.10863e+11	1.0643e+10	1.35628e-05	48.8261		2450	991	1156.61	60.6857	0.0658461	2.33783e+11	2.33783e+11	1.53937e+10	1.6551e-05	59.5836		2950	991	1639.09	81.7714	0.0816472	2.56702e+11
1000	1001	161.512	26.4429	0.023657	1.67316e+11	1.67316e+11	3.95821e+09	7.25728e-06	26.1262		1500	1001	414.49	36.1286	0.037427	1.90236e+11	1.90236e+11	7.11996e+09	1.06669e-05	38.4007		1950	1001	748.051	-33.2	0.0507128	2.10863e+11	2.10863e+11	1.06935e+10	1.35586e-05	48.8108		2450	1001	1157.99	59.2286	0.0661931	2.33783e+11	2.33783e+11	1.54748e+10	1.65429e-05	59.5544		2950	1001	1640.77	72.1286	0.082112	2.56702e+11
1000	1011	162.094	24.9429	0.0237386	1.67316e+11	1.67316e+11	3.97186e+09	7.25664e-06	26.1239		1500	1011	415.324	35.7429	0.0375812	1.90236e+11	1.90236e+11	7.14928e+09	1.06649e-05	38.3936		1950	1011	749.161	47.5714	0.0509496	2.10863e+11	2.10863e+11	1.07434e+10	1.35543e-05	48.7956		2450	1011	1159.48	63.5571	0.0665371	2.33783e+11	2.33783e+11	1.55552e+10	1.65348e-05	59.5254		2950	1011	1642.48	73.3286	0.0825735	2.56702e+11
1000	1021	162.692	25.6286	0.0238189	1.67316e+11	1.67316e+11	3.98529e+09	7.25601e-06	26.1216		1500	1021	416.18	36.6857	0.0377333	1.90236e+11	1.90236e+11	7.17822e+09	1.06629e-05	38.3865		1950	1021	750.286	48.2143	0.0511839	2.10863e+11	2.10863e+11	1.07928e+10	1.35502e-05	48.7806		2450	1021	1161	65.0571	0.0668783	2.33783e+11	2.33783e+11	1.5635e+10	1.65269e-05	59.4968		2950	1021	1644.13	70.8	0.0830317	2.56702e+11
1000	1031	163.285	25.4143	0.0238979	1.67316e+11	1.67316e+11	3.99851e+09	7.25538e-06	26.1194		1500	1031	416.98	34.2857	0.0378835	1.90236e+11	1.90236e+11	7.20679e+09	1.0661e-05	38.3795		1950	1031	751.318	44.2286	0.0514158	2.10863e+11	2.10863e+11	1.08417e+10	1.35461e-05	48.7658		2450	1031	1162.37	58.8	0.0672165	2.33783e+11	2.33783e+11	1.5714e+10	1.6519e-05	59.4684		2950	1031	1645.88	75.0429	0.0834867	2.56702e+11
1000	1041	163.868	24.9857	0.0239756	1.67316e+11	1.67316e+11	4.01151e+09	7.25477e-06	26.1172		1500	1041	417.823	36.1286	0.0380317	1.90236e+11	1.90236e+11	7.235e+09	1.06591e-05	38.3726		1950	1041	752.399	46.3286	0.0516453	2.10863e+11	2.10863e+11	1.08901e+10	1.3542e-05	48.7511		2450	1041	1163.89	65.4429	0.0675519	2.33783e+11	2.33783e+11	1.57925e+10	1.65112e-05	59.4403		2950	1041	1647.62	74.3571	0.0839386	2.56702e+11
1000	1051	164.415	23.4429	0.024052	1.67316e+11	1.67316e+11	4.0243e+09	7.25417e-06	26.115		1500	1051	418.663	36	0.0381781	1.90236e+11	1.90236e+11	7.26284e+09	1.06572e-05	38.3658		1950	1051	753.578	50.5286	0.0518724	2.10863e+11	2.10863e+11	1.0938e+10	1.3538e-05	48.7366		2450	1051	1165.4	64.3714	0.0678845	2.33783e+11	2.33783e+11	1.58702e+10	1.65034e-05	59.4124		2950	1051	1661.9	204.071	0.0843873	2.56702e+11
1000	1061	165.028	26.2714	0.0241272	1.67316e+11	1.67316e+11	4.03688e+09	7.25358e-06	26.1129		1500	1061	419.493	35.5714	0.0383226	1.90236e+11	1.90236e+11	7.29033e+09	1.06553e-05	38.3591		1950	1061	754.562	42.1714	0.0520971	2.10863e+11	2.10863e+11	1.09854e+10	1.3534e-05	48.7223		2450	1061	1166.85	62.3143	0.0682143	2.33783e+11	2.33783e+11	1.59473e+10	1.64958e-05	59.3848		2950	1061	1663.45	66.3	0.0848329	2.56702e+11
1000	1071	165.551	22.4143	0.0242012	1.67316e+11	1.67316e+11	4.04926e+09	7.25299e-06	26.1108		1500	1071	420.299	34.5429	0.0384652	1.90236e+11	1.90236e+11	7.31747e+09	1.06535e-05	38.3525		1950	1071	755.747	50.7857	0.0523196	2.10863e+11	2.10863e+11	1.10323e+10	1.353e-05	48.7081		2450	1071	1168.33	63.3	0.0685415	2.33783e+11	2.33783e+11	1.60238e+10	1.64882e-05	59.3574		2950	1071	1664.87	60.6857	0.0852754	2.56702e+11
1000	1081	166.155	25.8857	0.024274	1.67316e+11	1.67316e+11	4.06143e+09	7.25242e-06	26.1087		1500	1081	421.167	37.2	0.0386061	1.90236e+11	1.90236e+11	7.34426e+09	1.06517e-05	38.346		1950	1081	756.709	41.2286	0.0525398	2.10863e+11	2.10863e+11	1.10787e+10	1.35261e-05	48.6941		2450	1081	1169.78	62.1	0.0688659	2.33783e+11	2.33783e+11	1.60997e+10	1.64806e-05	59.3303		2950	1081	1666.33	62.8714	0.085715	2.56702e+11
1000	1091	166.679	22.4571	0.0243456	1.67316e+11	1.67316e+11	4.07342e+09	7.25186e-06	26.1067		1500	1091	422.019	36.5143	0.0387452	1.90236e+11	1.90236e+11	7.37071e+09	1.06499e-05	38.3395		1950	1091	757.995	55.1143	0.0527577	2.10863e+11	2.10863e+11	1.11247e+10	1.35223e-05	48.6802		2450	1091	1171.26	63.5143	0.0691877	2.33783e+11	2.33783e+11	1.61749e+10	1.64732e-05	59.3035		2950	1091	1667.88	66.3857	0.0861516	2.56702e+11
1000	1101	167.266	25.1571	0.024416	1.67316e+11	1.67316e+11	4.0852e+09	7.2513e-06	26.1047		1500	1101	422.856	35.8714	0.0388825	1.90236e+11	1.90236e+11	7.39684e+09	1.06481e-05	38.3332		1950	1101	759.092	47.0143	0.0529734	2.10863e+11	2.10863e+11	1.11701e+10	1.35185e-05	48.6664		2450	1101	1172.74	63.3429	0.0695069	2.33783e+11	2.33783e+11	1.62495e+10	1.64658e-05	59.2769		2950	1101	1669.34	62.5714	0.0865853	2.56702e+11
1000	1111	167.811	23.3571	0.0244854	1.67316e+11	1.67316e+11	4.0968e+09	7.25076e-06	26.1027		1500	1111	423.688	35.6571	0.0390181	1.90236e+11	1.90236e+11	7.42263e+09	1.06464e-05	38.3269		1950	1111	760.176	46.4571	0.0531869	2.10863e+11	2.10863e+11	1.12152e+10	1.35147e-05	48.6528		2450	1111	1174.16	60.8571	0.0698235	2.33783e+11	2.33783e+11	1.63235e+10	1.64585e-05	59.2505		2950	1111	1670.87	65.4857	0.087016	2.56702e+11
1000	1121	168.408	25.5857	0.0245536	1.67316e+11	1.67316e+11	4.10822e+09	7.25022e-06	26.1008		1500	1121	424.601	39.1286	0.0391519	1.90236e+11	1.90236e+11	7.4481e+09	1.06446e-05	38.3207		1950	1121	761.248	45.9429	0.0533983	2.10863e+11	2.10863e+11	1.12597e+10	1.35109e-05	48.6394		2450	1121	1175.65	63.9857	0.0701376	2.33783e+11	2.33783e+11	1.63969e+10	1.64512e-05	59.2243		2950	1121	1672.43	66.8571	0.087444	2.56702e+11
1000	1131	169.03	26.6571	0.0246207	1.67316e+11	1.67316e+11	4.11945e+09	7.24969e-06	26.0989		1500	1131	425.488	38.0143	0.0392841	1.90236e+11	1.90236e+11	7.47325e+09	1.06429e-05	38.3146		1950	1131	762.327	46.2429	0.0536076	2.10863e+11	2.10863e+11	1.13039e+10	1.35072e-05	48.6261		2450	1131	1184.74	129.886	0.0704491	2.33783e+11	2.33783e+11	1.64698e+10	1.6444e-05	59.1984		2950	1131	1673.97	65.8714	0.0878691	2.56702e+11
1000	1141	169.646	26.4	0.0246867	1.67316e+11	1.67316e+11	4.1305e+09	7.24917e-06	26.097		1500	1141	426.359	37.3286	0.0394147	1.90236e+11	1.90236e+11	7.49808e+09	1.06413e-05	38.3085		1950	1141	763.306	41.9571	0.0538148	2.10863e+11	2.10863e+11	1.13476e+10	1.35036e-05	48.6129		2450	1141	1186.04	55.8429	0.0707582	2.33783e+11	2.33783e+11	1.6542e+10	1.64369e-05	59.1727		2950	1141	1675.57	68.9143	0.0882914	2.56702e+11
1000	1151	170.145	21.3857	0.0247517	1.67316e+11	1.67316e+11	4.14137e+09	7.24866e-06	26.0952		1500	1151	427.201	36.0857	0.0395436	1.90236e+11	1.90236e+11	7.52261e+09	1.06396e-05	38.3026		1950	1151	764.291	42.2143	0.0540199	2.10863e+11	2.10863e+11	1.13908e+10	1.35e-05	48.5999		2450	1151	1187.37	56.8286	0.0710649	2.33783e+11	2.33783e+11	1.66137e+10	1.64298e-05	59.1473		2950	1151	1677.16	67.8429	0.0887109	2.56702e+11
1000	1161	170.707	24.0857	0.0248157	1.67316e+11	1.67316e+11	4.15207e+09	7.24816e-06	26.0934		1500	1161	428.09	38.1	0.0396709	1.90236e+11	1.90236e+11	7.54683e+09	1.0638e-05	38.2967		1950	1161	765.465	50.3143	0.0542229	2.10863e+11	2.10863e+11	1.14336e+10	1.34964e-05	48.587		2450	1161	1188.68	56.2286	0.0713691	2.33783e+11	2.33783e+11	1.66848e+10	1.64228e-05	59.122		2950	1161	1678.71	66.7286	0.0891278	2.56702e+11
1000	1171	171.334	26.8714	0.0248786	1.67316e+11	1.67316e+11	4.1626e+09	7.24766e-06	26.0916		1500	1171	428.937	36.3	0.0397967	1.90236e+11	1.90236e+11	7.57075e+09	1.06363e-05	38.2909		1950	1171	766.644	50.5286	0.054424	2.10863e+11	2.10863e+11	1.1476e+10	1.34928e-05	48.5742		2450	1171	1189.96	54.7714	0.0716709	2.33783e+11	2.33783e+11	1.67554e+10	1.64158e-05	59.097		2950	1171	1680.37	70.8	0.089542	2.56702e+11
1000	1181	171.946	26.2286	0.0249405	1.67316e+11	1.67316e+11	4.17296e+09	7.24718e-06	26.0898		1500	1181	429.833	38.4	0.0399209	1.90236e+11	1.90236e+11	7.59438e+09	1.06348e-05	38.2851		1950	1181	767.753	47.5286	0.0546231	2.10863e+11	2.10863e+11	1.1518e+10	1.34893e-05	48.5616		2450	1181	1191.3	57.3	0.0719704	2.33783e+11	2.33783e+11	1.68254e+10	1.6409e-05	59.0722		2950	1181	1681.87	64.3714	0.0899535	2.56702e+11
1000	1191	172.496	23.5714	0.0250015	1.67316e+11	1.67316e+11	4.18316e+09	7.2467e-06	26.0881		1500	1191	430.647	34.8857	0.0400435	1.90236e+11	1.90236e+11	7.61771e+09	1.06332e-05	38.2795		1950	1191	768.963	51.8571	0.0548202	2.10863e+11	2.10863e+11	1.15596e+10	1.34859e-05	48.5491		2450	1191	1192.61	56.4429	0.0722676	2.33783e+11	2.33783e+11	1.68949e+10	1.64021e-05	59.0476		2950	1191	1683.61	74.7857	0.0903624	2.56702e+11
1000	1201	173.108	26.2286	0.0250614	1.67316e+11	1.67316e+11	4.19319e+09	7.24622e-06	26.0864		1500	1201	431.521	37.4571	0.0401647	1.90236e+11	1.90236e+11	7.64076e+09	1.06316e-05	38.2739		1950	1201	770.124	49.7571	0.0550154	2.10863e+11	2.10863e+11	1.16007e+10	1.34824e-05	48.5368		2450	1201	1193.95	57.0857	0.0725624	2.33783e+11	2.33783e+11	1.69638e+10	1.63953e-05	59.0233		2950	1201	1685.23	69.3429	0.0907687	2.56702e+11
1000	1211	173.72	26.2286	0.0251205	1.67316e+11	1.67316e+11	4.20307e+09	7.24576e-06	26.0847		1500	1211	432.427	38.8286	0.0402843	1.90236e+11	1.90236e+11	7.66352e+09	1.06301e-05	38.2683		1950	1211	771.26	48.6857	0.0552087	2.10863e+11	2.10863e+11	1.16415e+10	1.3479e-05	48.5245		2450	1211	1195.24	55.6286	0.072855	2.33783e+11	2.33783e+11	1.70322e+10	1.63886e-05	58.9991		2950	1211	1686.86	69.9	0.0911725	2.56702e+11
1000	1221	174.282	24.0857	0.0251786	1.67316e+11	1.67316e+11	4.21278e+09	7.2453e-06	26.0831		1500	1221	433.287	36.8571	0.0404025	1.90236e+11	1.90236e+11	7.68601e+09	1.06286e-05	38.2629		1950	1221	772.367	47.4429	0.0554001	2.10863e+11	2.10863e+11	1.16818e+10	1.34757e-05	48.5124		2450	1221	1196.53	55.0714	0.0731454	2.33783e+11	2.33783e+11	1.71001e+10	1.6382e-05	58.9751		2950	1221	1688.54	71.7	0.0915737	2.56702e+11
1000	1231	174.865	24.9857	0.0252357	1.67316e+11	1.67316e+11	4.22235e+09	7.24485e-06	26.0815		1500	1231	434.186	38.5286	0.0405193	1.90236e+11	1.90236e+11	7.70822e+09	1.06271e-05	38.2575		1950	1231	773.503	48.6857	0.0555897	2.10863e+11	2.10863e+11	1.17218e+10	1.34723e-05	48.5004		2450	1231	1197.83	55.6714	0.0734336	2.33783e+11	2.33783e+11	1.71675e+10	1.63754e-05	58.9513		2950	1231	1683.25	-75.5286	0.0919725	2.56702e+11
1000	1241	175.473	26.0571	0.025292	1.67316e+11	1.67316e+11	4.23176e+09	7.24441e-06	26.0799		1500	1241	435.094	38.9143	0.0406346	1.90236e+11	1.90236e+11	7.73015e+09	1.06256e-05	38.2522		1950	1241	774.691	50.9143	0.0557774	2.10863e+11	2.10863e+11	1.17614e+10	1.3469e-05	48.4885		2450	1241	1199.15	56.6143	0.0737195	2.33783e+11	2.33783e+11	1.72343e+10	1.63688e-05	58.9278		2950	1241	1684.93	72.0429	0.0923688	2.56702e+11
1000	1251	176.078	25.9286	0.0253473	1.67316e+11	1.67316e+11	4.24102e+09	7.24398e-06	26.0783		1500	1251	435.391	4.24286	0.0407485	1.90236e+11	1.90236e+11	7.75182e+09	1.06241e-05	38.2469		1950	1251	775.878	50.8714	0.0559634	2.10863e+11	2.10863e+11	1.18006e+10	1.34658e-05	48.4768		2450	1251	1200.53	59.1857	0.0740033	2.33783e+11	2.33783e+11	1.73007e+10	1.63623e-05	58.9044		2950	1251	1686.43	64.1143	0.0927627	2.56702e+11
1000	1261	176.677	25.6714	0.0254018	1.67316e+11	1.67316e+11	4.25014e+09	7.24355e-06	26.0768		1500	1261	436.391	42.8571	0.0408611	1.90236e+11	1.90236e+11	7.77323e+09	1.06227e-05	38.2417		1950	1261	776.974	46.9714	0.0561475	2.10863e+11	2.10863e+11	1.18394e+10	1.34625e-05	48.4652		2450	1261	1201.9	58.7571	0.074285	2.33783e+11	2.33783e+11	1.73665e+10	1.63559e-05	58.8812		2950	1261	1687.85	61.2	0.0931541	2.56702e+11
1000	1271	177.28	25.8429	0.0254555	1.67316e+11	1.67316e+11	4.25912e+09	7.24313e-06	26.0753		1500	1271	437.189	34.2	0.0409722	1.90236e+11	1.90236e+11	7.79438e+09	1.06213e-05	38.2366		1950	1271	778.134	49.7143	0.0563299	2.10863e+11	2.10863e+11	1.18779e+10	1.34593e-05	48.4537		2450	1271	1203.27	58.5429	0.0745646	2.33783e+11	2.33783e+11	1.74319e+10	1.63495e-05	58.8582		2950	1271	1689.43	67.6286	0.0935432	2.56702e+11
1000	1281	177.839	23.9571	0.0255083	1.67316e+11	1.67316e+11	4.26795e+09	7.24271e-06	26.0738		1500	1281	438.062	37.4143	0.041082	1.90236e+11	1.90236e+11	7.81527e+09	1.06199e-05	38.2315		1950	1281	779.332	51.3429	0.0565105	2.10863e+11	2.10863e+11	1.1916e+10	1.34562e-05	48.4423		2450	1281	1204.64	58.8	0.0748421	2.33783e+11	2.33783e+11	1.74968e+10	1.63432e-05	58.8355		2950	1281	1690.94	64.7143	0.0939299	2.56702e+11
1000	1291	178.425	25.1143	0.0255602	1.67316e+11	1.67316e+11	4.27664e+09	7.2423e-06	26.0723		1500	1291	438.828	32.8286	0.0411905	1.90236e+11	1.90236e+11	7.83591e+09	1.06185e-05	38.2265		1950	1291	780.503	50.1857	0.0566894	2.10863e+11	2.10863e+11	1.19537e+10	1.3453e-05	48.431		2450	1291	1206.05	60.3429	0.0751175	2.33783e+11	2.33783e+11	1.75612e+10	1.63369e-05	58.8128		2950	1291	1692.6	70.9286	0.0943143	2.56702e+11
1000	1301	179.044	26.5286	0.0256114	1.67316e+11	1.67316e+11	4.2852e+09	7.2419e-06	26.0709		1500	1301	439.702	37.4571	0.0412977	1.90236e+11	1.90236e+11	7.8563e+09	1.06171e-05	38.2216		1950	1301	781.688	50.7857	0.0568667	2.10863e+11	2.10863e+11	1.19911e+10	1.34499e-05	48.4198		2450	1301	1207.43	59.4	0.075391	2.33783e+11	2.33783e+11	1.76251e+10	1.63307e-05	58.7904		2950	1301	1694.14	66.3	0.0946965	2.56702e+11
1000	1311	179.696	27.9429	0.0256617	1.67316e+11	1.67316e+11	4.29362e+09	7.24151e-06	26.0694		1500	1311	440.452	32.1429	0.0414036	1.90236e+11	1.90236e+11	7.87645e+09	1.06158e-05	38.2167		1950	1311	782.807	47.9571	0.0570422	2.10863e+11	2.10863e+11	1.20281e+10	1.34469e-05	48.4087		2450	1311	1208.75	56.2286	0.0756624	2.33783e+11	2.33783e+11	1.76885e+10	1.63245e-05	58.7682		2950	1311	1695.69	66.3857	0.0950763	2.56702e+11
1000	1321	180.249	23.7	0.0257112	1.67316e+11	1.67316e+11	4.30191e+09	7.24112e-06	26.068		1500	1321	441.217	32.7857	0.0415083	1.90236e+11	1.90236e+11	7.89636e+09	1.06144e-05	38.2119		1950	1321	784.079	54.5143	0.0572161	2.10863e+11	2.10863e+11	1.20648e+10	1.34438e-05	48.3978		2450	1321	1210.25	64.4143	0.0759318	2.33783e+11	2.33783e+11	1.77515e+10	1.63184e-05	58.7461		2950	1321	1696.82	48.1714	0.0954539	2.56702e+11
1000	1331	180.878	26.9571	0.02576	1.67316e+11	1.67316e+11	4.31007e+09	7.24074e-06	26.0666		1500	1331	442.069	36.5143	0.0416116	1.90236e+11	1.90236e+11	7.91602e+09	1.06131e-05	38.2071		1950	1331	785.262	50.7	0.0573884	2.10863e+11	2.10863e+11	1.21011e+10	1.34408e-05	48.3869		2450	1331	1211.65	59.8714	0.0761992	2.33783e+11	2.33783e+11	1.78141e+10	1.63123e-05	58.7242		2950	1331	1698.39	67.4571	0.0958293	2.56702e+11
1000	1341	181.42	23.2286	0.025808	1.67316e+11	1.67316e+11	4.3181e+09	7.24036e-06	26.0653		1500	1341	442.813	31.8857	0.0417138	1.90236e+11	1.90236e+11	7.93545e+09	1.06118e-05	38.2024		1950	1341	786.424	49.8	0.0575591	2.10863e+11	2.10863e+11	1.21371e+10	1.34378e-05	48.3762		2450	1341	1213.07	61.1571	0.0764648	2.33783e+11	2.33783e+11	1.78761e+10	1.63063e-05	58.7025		2950	1341	1700.07	72	0.0962024	2.56702e+11
1000	1351	182.068	27.7714	0.0258553	1.67316e+11	1.67316e+11	4.32601e+09	7.23999e-06	26.064		1500	1351	443.584	33.0429	0.0418147	1.90236e+11	1.90236e+11	7.95465e+09	1.06105e-05	38.1978		1950	1351	787.573	49.2429	0.0577282	2.10863e+11	2.10863e+11	1.21727e+10	1.34349e-05	48.3656		2450	1351	1214.45	59.0571	0.0767284	2.33783e+11	2.33783e+11	1.79378e+10	1.63003e-05	58.681		2950	1351	1701.66	68.2714	0.0965734	2.56702e+11
1000	1361	182.641	24.5571	0.0259018	1.67316e+11	1.67316e+11	4.33379e+09	7.23962e-06	26.0626		1500	1361	444.586	42.9429	0.0419144	1.90236e+11	1.90236e+11	7.97362e+09	1.06092e-05	38.1932		1950	1361	788.844	54.4714	0.0578957	2.10863e+11	2.10863e+11	1.22081e+10	1.3432e-05	48.355		2450	1361	1215.88	61.2429	0.0769901	2.33783e+11	2.33783e+11	1.79989e+10	1.62943e-05	58.6596		2950	1361	1703.29	69.9	0.0969423	2.56702e+11
1000	1371	192.896	146.5	0.0259476	1.67316e+11	1.67316e+11	4.34145e+09	7.23926e-06	26.0613		1500	1371	445.445	36.8143	0.042013	1.90236e+11	1.90236e+11	7.99236e+09	1.0608e-05	38.1887		1950	1371	790.016	50.2286	0.0580616	2.10863e+11	2.10863e+11	1.22431e+10	1.34291e-05	48.3446		2450	1371	1212.01	-55.3	0.0772499	2.33783e+11	2.33783e+11	1.80597e+10	1.62884e-05	58.6384		2950	1371	1704.97	71.8714	0.097309	2.56702e+11
1000	1381	193.434	23.0571	0.0259927	1.67316e+11	1.67316e+11	4.349e+09	7.23891e-06	26.0601		1500	1381	446.306	36.9	0.0421103	1.90236e+11	1.90236e+11	8.01089e+09	1.06067e-05	38.1842		1950	1381	791.209	51.1286	0.058226	2.10863e+11	2.10863e+11	1.22777e+10	1.34262e-05	48.3343		2450	1381	1213.34	56.9571	0.0775079	2.33783e+11	2.33783e+11	1.812e+10	1.62826e-05	58.6174		2950	1381	1706.38	60.2571	0.0976737	2.56702e+11
1000	1391	194.284	36.4286	0.026037	1.67316e+11	1.67316e+11	4.35642e+09	7.23856e-06	26.0588		1500	1391	447.142	35.8286	0.0422065	1.90236e+11	1.90236e+11	8.02919e+09	1.06055e-05	38.1798		1950	1391	797.169	85.1429	0.0583889	2.10863e+11	2.10863e+11	1.23121e+10	1.34233e-05	48.324		2450	1391	1214.62	54.8143	0.077764	2.33783e+11	2.33783e+11	1.81799e+10	1.62768e-05	58.5965		2950	1391	1708.14	75.4286	0.0980362	2.56702e+11
1000	1401	194.802	22.2	0.0260807	1.67316e+11	1.67316e+11	4.36373e+09	7.23822e-06	26.0576		1500	1401	448.008	37.1143	0.0423016	1.90236e+11	1.90236e+11	8.04728e+09	1.06043e-05	38.1754		1950	1401	798.239	45.8571	0.0585503	2.10863e+11	2.10863e+11	1.23461e+10	1.34205e-05	48.3139		2450	1401	1215.96	57.6857	0.0780184	2.33783e+11	2.33783e+11	1.82393e+10	1.6271e-05	58.5758		2950	1401	1709.81	71.6571	0.0983967	2.56702e+11
1000	1411	195.3	21.3429	0.0261237	1.67316e+11	1.67316e+11	4.37092e+09	7.23788e-06	26.0564		1500	1411	448.844	35.8286	0.0423955	1.90236e+11	1.90236e+11	8.06515e+09	1.06031e-05	38.1711		1950	1411	799.271	44.2286	0.0587103	2.10863e+11	2.10863e+11	1.23798e+10	1.34177e-05	48.3039		2450	1411	1217.18	52.3286	0.0782709	2.33783e+11	2.33783e+11	1.82984e+10	1.62653e-05	58.5552		2950	1411	1711.38	67.3714	0.0987551	2.56702e+11
1000	1421	195.845	23.3571	0.026166	1.67316e+11	1.67316e+11	4.37801e+09	7.23755e-06	26.0552		1500	1421	449.608	32.7429	0.0424884	1.90236e+11	1.90236e+11	8.08281e+09	1.06019e-05	38.1668		1950	1421	800.17	38.5286	0.0588687	2.10863e+11	2.10863e+11	1.24132e+10	1.3415e-05	48.2939		2450	1421	1218.5	56.5286	0.0785217	2.33783e+11	2.33783e+11	1.8357e+10	1.62597e-05	58.5348		2950	1421	1713.03	70.5857	0.0991116	2.56702e+11
1000	1431	196.325	20.5714	0.0262077	1.67316e+11	1.67316e+11	4.38498e+09	7.23722e-06	26.054		1500	1431	450.257	27.8143	0.0425801	1.90236e+11	1.90236e+11	8.10026e+09	1.06007e-05	38.1626		1950	1431	801.066	38.4	0.0590257	2.10863e+11	2.10863e+11	1.24464e+10	1.34122e-05	48.2841		2450	1431	1219.64	48.5571	0.0787707	2.33783e+11	2.33783e+11	1.84152e+10	1.62541e-05	58.5146		2950	1431	1714.74	73.2429	0.099466	2.56702e+11
1000	1441	196.904	24.8143	0.0262487	1.67316e+11	1.67316e+11	4.39184e+09	7.2369e-06	26.0528		1500	1441	451.134	37.5857	0.0426708	1.90236e+11	1.90236e+11	8.11751e+09	1.05996e-05	38.1585		1950	1441	802.151	46.5	0.0591813	2.10863e+11	2.10863e+11	1.24792e+10	1.34095e-05	48.2743		2450	1441	1221.03	59.7429	0.079018	2.33783e+11	2.33783e+11	1.8473e+10	1.62485e-05	58.4945		2950	1441	1716.42	72.1286	0.0998185	2.56702e+11
1000	1451	197.374	20.1429	0.0262891	1.67316e+11	1.67316e+11	4.3986e+09	7.23658e-06	26.0517		1500	1451	452.023	38.1	0.0427604	1.90236e+11	1.90236e+11	8.13456e+09	1.05984e-05	38.1543		1950	1451	803.193	44.6571	0.0593355	2.10863e+11	2.10863e+11	1.25117e+10	1.34069e-05	48.2647		2450	1451	1222.4	58.7571	0.0792636	2.33783e+11	2.33783e+11	1.85304e+10	1.62429e-05	58.4746		2950	1451	1718.03	68.7857	0.100169	2.56702e+11
1000	1461	197.865	21.0429	0.0263289	1.67316e+11	1.67316e+11	4.40525e+09	7.23627e-06	26.0506		1500	1461	452.917	38.3143	0.042849	1.90236e+11	1.90236e+11	8.15141e+09	1.05973e-05	38.1503		1950	1461	804.265	45.9429	0.0594883	2.10863e+11	2.10863e+11	1.25439e+10	1.34042e-05	48.2551		2450	1461	1223.78	59.1429	0.0795075	2.33783e+11	2.33783e+11	1.85875e+10	1.62374e-05	58.4548		2950	1461	1719.69	71.3143	0.100518	2.56702e+11
1000	1471	198.377	21.9429	0.026368	1.67316e+11	1.67316e+11	4.4118e+09	7.23597e-06	26.0495		1500	1471	453.837	39.4286	0.0429365	1.90236e+11	1.90236e+11	8.16806e+09	1.05962e-05	38.1463		1950	1471	805.337	45.9429	0.0596397	2.10863e+11	2.10863e+11	1.25758e+10	1.34016e-05	48.2456		2450	1471	1224.7	39.2143	0.0797497	2.33783e+11	2.33783e+11	1.86441e+10	1.6232e-05	58.4352		2950	1471	1721.42	73.9714	0.100864	2.56702e+11
1000	1481	198.749	15.9429	0.0264066	1.67316e+11	1.67316e+11	4.41825e+09	7.23566e-06	26.0484		1500	1481	454.73	38.2714	0.043023	1.90236e+11	1.90236e+11	8.18452e+09	1.05951e-05	38.1423		1950	1481	806.409	45.9429	0.0597898	2.10863e+11	2.10863e+11	1.26075e+10	1.3399e-05	48.2363		2450	1481	1225.97	54.8143	0.0799902	2.33783e+11	2.33783e+11	1.87003e+10	1.62266e-05	58.4157		2950	1481	1723.07	70.9714	0.101209	2.56702e+11
1000	1491	199.188	18.8143	0.0264445	1.67316e+11	1.67316e+11	4.4246e+09	7.23537e-06	26.0473		1500	1491	455.631	38.6143	0.0431085	1.90236e+11	1.90236e+11	8.20078e+09	1.0594e-05	38.1384		1950	1491	807.469	45.4286	0.0599385	2.10863e+11	2.10863e+11	1.26388e+10	1.33964e-05	48.227		2450	1491	1227.38	60.2571	0.0802291	2.33783e+11	2.33783e+11	1.87562e+10	1.62212e-05	58.3964		2950	1491	1724.67	68.6143	0.101552	2.56702e+11
1000	1501	199.809	26.6143	0.0264819	1.67316e+11	1.67316e+11	4.43085e+09	7.23507e-06	26.0463		1500	1501	456.537	38.8286	0.043193	1.90236e+11	1.90236e+11	8.21686e+09	1.05929e-05	38.1345		1950	1501	808.542	45.9857	0.0600858	2.10863e+11	2.10863e+11	1.26699e+10	1.33938e-05	48.2177		2450	1501	1228.74	58.2	0.0804664	2.33783e+11	2.33783e+11	1.88116e+10	1.62159e-05	58.3772		2950	1501	1726.38	73.3286	0.101893	2.56702e+11
1000	1511	200.375	24.2571	0.0265187	1.67316e+11	1.67316e+11	4.43701e+09	7.23478e-06	26.0452		1500	1511	457.411	37.4571	0.0432765	1.90236e+11	1.90236e+11	8.23275e+09	1.05919e-05	38.1307		1950	1511	809.648	47.4	0.0602319	2.10863e+11	2.10863e+11	1.27007e+10	1.33913e-05	48.2086		2450	1511	1230.15	60.3	0.0807021	2.33783e+11	2.33783e+11	1.88667e+10	1.62106e-05	58.3581		2950	1511	1728.04	71.1	0.102232	2.56702e+11
1000	1521	200.943	24.3429	0.0265549	1.67316e+11	1.67316e+11	4.44307e+09	7.2345e-06	26.0442		1500	1521	458.271	36.8571	0.0433591	1.90236e+11	1.90236e+11	8.24845e+09	1.05908e-05	38.1269		1950	1521	810.748	47.1429	0.0603767	2.10863e+11	2.10863e+11	1.27312e+10	1.33888e-05	48.1996		2450	1521	1231.55	60.0429	0.0809362	2.33783e+11	2.33783e+11	1.89215e+10	1.62053e-05	58.3392		2950	1521	1729.71	71.3143	0.10257	2.56702e+11
1000	1531	201.436	21.1286	0.0265905	1.67316e+11	1.67316e+11	4.44903e+09	7.23422e-06	26.0432		1500	1531	459.165	38.3143	0.0434407	1.90236e+11	1.90236e+11	8.26397e+09	1.05898e-05	38.1231		1950	1531	811.907	49.6714	0.0605201	2.10863e+11	2.10863e+11	1.27615e+10	1.33863e-05	48.1906		2450	1531	1232.99	62.0143	0.0811687	2.33783e+11	2.33783e+11	1.89758e+10	1.62001e-05	58.3205		2950	1531	1744.08	205.386	0.102905	2.56702e+11
1000	1541	202.042	25.9714	0.0266256	1.67316e+11	1.67316e+11	4.45491e+09	7.23395e-06	26.0422		1500	1541	460.045	37.7143	0.0435214	1.90236e+11	1.90236e+11	8.27932e+09	1.05887e-05	38.1194		1950	1541	812.859	40.8	0.0606623	2.10863e+11	2.10863e+11	1.27915e+10	1.33838e-05	48.1817		2450	1541	1234.37	58.9286	0.0813996	2.33783e+11	2.33783e+11	1.90298e+10	1.6195e-05	58.3018		2950	1541	1745.59	64.5429	0.103239	2.56702e+11
1000	1551	202.634	25.3714	0.0266602	1.67316e+11	1.67316e+11	4.46069e+09	7.23368e-06	26.0412		1500	1551	460.909	37.0286	0.0436011	1.90236e+11	1.90236e+11	8.29448e+09	1.05877e-05	38.1158		1950	1551	813.951	46.8	0.0608033	2.10863e+11	2.10863e+11	1.28212e+10	1.33814e-05	48.1729		2450	1551	1235.71	57.6857	0.081629	2.33783e+11	2.33783e+11	1.90834e+10	1.61898e-05	58.2833		2950	1551	1746.95	58.2	0.103571	2.56702e+11
1000	1561	203.2	24.2571	0.0266942	1.67316e+11	1.67316e+11	4.46638e+09	7.23341e-06	26.0403		1500	1561	461.763	36.6	0.0436799	1.90236e+11	1.90236e+11	8.30948e+09	1.05867e-05	38.1122		1950	1561	815.021	45.8571	0.060943	2.10863e+11	2.10863e+11	1.28506e+10	1.3379e-05	48.1642		2450	1561	1237.11	59.8714	0.0818569	2.33783e+11	2.33783e+11	1.91367e+10	1.61847e-05	58.265		2950	1561	1748.36	60.4286	0.103901	2.56702e+11
1000	1571	203.768	24.3429	0.0267277	1.67316e+11	1.67316e+11	4.47199e+09	7.23315e-06	26.0393		1500	1571	462.636	37.4143	0.0437578	1.90236e+11	1.90236e+11	8.3243e+09	1.05857e-05	38.1086		1950	1571	816.109	46.6286	0.0610815	2.10863e+11	2.10863e+11	1.28798e+10	1.33766e-05	48.1556		2450	1571	1238.5	59.3571	0.0820833	2.33783e+11	2.33783e+11	1.91896e+10	1.61797e-05	58.2468		2950	1571	1749.85	63.8143	0.10423	2.56702e+11
1000	1581	204.307	23.1	0.0267607	1.67316e+11	1.67316e+11	4.47751e+09	7.23289e-06	26.0384		1500	1581	463.589	40.8429	0.0438348	1.90236e+11	1.90236e+11	8.33894e+09	1.05847e-05	38.1051		1950	1581	817.164	45.2143	0.0612187	2.10863e+11	2.10863e+11	1.29088e+10	1.33742e-05	48.147		2450	1581	1239.93	61.5857	0.0823081	2.33783e+11	2.33783e+11	1.92422e+10	1.61746e-05	58.2287		2950	1581	1751.25	60.1714	0.104557	2.56702e+11
1000	1591	204.872	24.2143	0.0267932	1.67316e+11	1.67316e+11	4.48295e+09	7.23263e-06	26.0375		1500	1591	464.49	38.6143	0.0439109	1.90236e+11	1.90236e+11	8.35343e+09	1.05838e-05	38.1016		1950	1591	818.236	45.9429	0.0613548	2.10863e+11	2.10863e+11	1.29375e+10	1.33718e-05	48.1386		2450	1591	1241.31	59.0571	0.0825315	2.33783e+11	2.33783e+11	1.92944e+10	1.61696e-05	58.2107		2950	1591	1752.83	67.8857	0.104882	2.56702e+11
1000	1601	205.401	22.6714	0.0268252	1.67316e+11	1.67316e+11	4.4883e+09	7.23238e-06	26.0366		1500	1601	465.382	38.2286	0.0439862	1.90236e+11	1.90236e+11	8.36774e+09	1.05828e-05	38.0982		1950	1601	819.418	50.6571	0.0614897	2.10863e+11	2.10863e+11	1.29659e+10	1.33695e-05	48.1302		2450	1601	1242.71	60.0429	0.0827535	2.33783e+11	2.33783e+11	1.93463e+10	1.61647e-05	58.1929		2950	1601	1754.33	64.2857	0.105205	2.56702e+11
1000	1611	205.956	23.7857	0.0268567	1.67316e+11	1.67316e+11	4.49357e+09	7.23214e-06	26.0357		1500	1611	466.334	40.8	0.0440606	1.90236e+11	1.90236e+11	8.38189e+09	1.05819e-05	38.0948		1950	1611	820.493	46.0714	0.0616234	2.10863e+11	2.10863e+11	1.29941e+10	1.33672e-05	48.1218		2450	1611	1244.26	66.1714	0.0829739	2.33783e+11	2.33783e+11	1.93979e+10	1.61598e-05	58.1752		2950	1611	1755.91	67.7143	0.105527	2.56702e+11
1000	1621	206.473	22.1571	0.0268877	1.67316e+11	1.67316e+11	4.49876e+09	7.23189e-06	26.0348		1500	1621	467.227	38.2714	0.0441341	1.90236e+11	1.90236e+11	8.39588e+09	1.05809e-05	38.0914		1950	1621	821.712	52.2429	0.0617559	2.10863e+11	2.10863e+11	1.3022e+10	1.33649e-05	48.1136		2450	1621	1245.57	56.4429	0.083193	2.33783e+11	2.33783e+11	1.94491e+10	1.61549e-05	58.1576		2950	1621	1757.43	64.8429	0.105847	2.56702e+11
1000	1631	207.048	24.6429	0.0269183	1.67316e+11	1.67316e+11	4.50387e+09	7.23165e-06	26.034		1500	1631	468.109	37.8	0.0442068	1.90236e+11	1.90236e+11	8.40971e+09	1.058e-05	38.0881		1950	1631	822.812	47.1429	0.0618873	2.10863e+11	2.10863e+11	1.30498e+10	1.33626e-05	48.1054		2450	1631	1247.09	65.0143	0.0834106	2.33783e+11	2.33783e+11	1.94999e+10	1.615e-05	58.1401		2950	1631	1758.92	63.9857	0.106166	2.56702e+11
1000	1641	207.616	24.3429	0.0269483	1.67316e+11	1.67316e+11	4.5089e+09	7.23142e-06	26.0331		1500	1641	469.03	39.4714	0.0442787	1.90236e+11	1.90236e+11	8.42338e+09	1.05791e-05	38.0848		1950	1641	823.963	49.3286	0.0620176	2.10863e+11	2.10863e+11	1.30772e+10	1.33604e-05	48.0973		2450	1641	1248.48	59.7	0.0836268	2.33783e+11	2.33783e+11	1.95505e+10	1.61452e-05	58.1228		2950	1641	1760.48	66.7714	0.106483	2.56702e+11
1000	1651	208.14	22.4571	0.026978	1.67316e+11	1.67316e+11	4.51385e+09	7.23119e-06	26.0323		1500	1651	469.927	38.4429	0.0443497	1.90236e+11	1.90236e+11	8.4369e+09	1.05782e-05	38.0815		1950	1651	825.076	47.7	0.0621467	2.10863e+11	2.10863e+11	1.31045e+10	1.33581e-05	48.0893		2450	1651	1249.91	60.9429	0.0838416	2.33783e+11	2.33783e+11	1.96007e+10	1.61404e-05	58.1056		2950	1651	1762.07	68.1857	0.106798	2.56702e+11
1000	1661	208.671	22.7571	0.0270071	1.67316e+11	1.67316e+11	4.51873e+09	7.23096e-06	26.0314		1500	1661	470.855	39.7714	0.04442	1.90236e+11	1.90236e+11	8.45027e+09	1.05773e-05	38.0783		1950	1661	826.195	47.9571	0.0622747	2.10863e+11	2.10863e+11	1.31314e+10	1.33559e-05	48.0813		2450	1661	1251.36	62.5286	0.084055	2.33783e+11	2.33783e+11	1.96506e+10	1.61357e-05	58.0885		2950	1661	1763.59	65.2286	0.107112	2.56702e+11
1000	1671	209.21	23.1	0.0270358	1.67316e+11	1.67316e+11	4.52354e+09	7.23073e-06	26.0306		1500	1671	471.784	39.8143	0.0444894	1.90236e+11	1.90236e+11	8.46348e+09	1.05764e-05	38.0751		1950	1671	827.29	46.9286	0.0624016	2.10863e+11	2.10863e+11	1.31582e+10	1.33537e-05	48.0734		2450	1671	1252.73	58.3286	0.0842671	2.33783e+11	2.33783e+11	1.97002e+10	1.6131e-05	58.0715		2950	1671	1765.24	70.6714	0.107424	2.56702e+11
1000	1681	209.811	25.7571	0.0270641	1.67316e+11	1.67316e+11	4.52827e+09	7.23051e-06	26.0298		1500	1681	472.673	38.1	0.0445581	1.90236e+11	1.90236e+11	8.47654e+09	1.05756e-05	38.072		1950	1681	828.512	52.3714	0.0625275	2.10863e+11	2.10863e+11	1.31847e+10	1.33516e-05	48.0656		2450	1681	1254.18	62.5286	0.0844778	2.33783e+11	2.33783e+11	1.97494e+10	1.61263e-05	58.0547		2950	1681	1766.75	64.8429	0.107734	2.56702e+11
1000	1691	210.367	23.8286	0.0270919	1.67316e+11	1.67316e+11	4.53293e+09	7.23029e-06	26.0291		1500	1691	473.568	38.3571	0.044626	1.90236e+11	1.90236e+11	8.48945e+09	1.05747e-05	38.0689		1950	1691	829.655	48.9857	0.0626522	2.10863e+11	2.10863e+11	1.32111e+10	1.33494e-05	48.0579		2450	1691	1255.64	62.1857	0.0846872	2.33783e+11	2.33783e+11	1.97984e+10	1.61217e-05	58.0379		2950	1691	1768.37	69.3	0.108043	2.56702e+11
1000	1701	210.94	24.5571	0.0271194	1.67316e+11	1.67316e+11	4.53751e+09	7.23008e-06	26.0283		1500	1701	474.478	39	0.0446931	1.90236e+11	1.90236e+11	8.50222e+09	1.05738e-05	38.0658		1950	1701	830.779	48.1714	0.0627759	2.10863e+11	2.10863e+11	1.32371e+10	1.33473e-05	48.0502		2450	1701	1257.06	61.0286	0.0848952	2.33783e+11	2.33783e+11	1.9847e+10	1.6117e-05	58.0213		2950	1701	1769.98	68.7857	0.108351	2.56702e+11
1000	1711	211.472	22.8	0.0271464	1.67316e+11	1.67316e+11	4.54203e+09	7.22987e-06	26.0275		1500	1711	475.439	41.1857	0.0447594	1.90236e+11	1.90236e+11	8.51485e+09	1.0573e-05	38.0628		1950	1711	831.939	49.7143	0.0628986	2.10863e+11	2.10863e+11	1.3263e+10	1.33452e-05	48.0426		2450	1711	1265.68	123.114	0.0851019	2.33783e+11	2.33783e+11	1.98953e+10	1.61124e-05	58.0048		2950	1711	1764.37	-80.0286	0.108657	2.56702e+11
1000	1721	212.114	27.5143	0.0271729	1.67316e+11	1.67316e+11	4.54648e+09	7.22966e-06	26.0268		1500	1721	480.287	69.2571	0.0448251	1.90236e+11	1.90236e+11	8.52733e+09	1.05722e-05	38.0598		1950	1721	829.743	-31.3714	0.0630202	2.10863e+11	2.10863e+11	1.32886e+10	1.33431e-05	48.035		2450	1721	1266.88	51.5571	0.0853074	2.33783e+11	2.33783e+11	1.99434e+10	1.61079e-05	57.9884		2950	1721	1765.85	63.4714	0.108961	2.56702e+11
1000	1731	212.641	22.5857	0.0271991	1.67316e+11	1.67316e+11	4.55086e+09	7.22945e-06	26.026		1500	1731	481.175	38.0571	0.0448899	1.90236e+11	1.90236e+11	8.53967e+09	1.05713e-05	38.0568		1950	1731	830.971	52.6286	0.0631407	2.10863e+11	2.10863e+11	1.33141e+10	1.3341e-05	48.0276		2450	1731	1268.23	57.7714	0.0855115	2.33783e+11	2.33783e+11	1.99911e+10	1.61034e-05	57.9721		2950	1731	1767.33	63.3429	0.109264	2.56702e+11
1000	1741	213.212	24.4714	0.0272249	1.67316e+11	1.67316e+11	4.55517e+09	7.22925e-06	26.0253		1500	1741	481.925	32.1429	0.0449541	1.90236e+11	1.90236e+11	8.55187e+09	1.05705e-05	38.0539		1950	1741	831.99	43.6714	0.0632603	2.10863e+11	2.10863e+11	1.33393e+10	1.33389e-05	48.0201		2450	1741	1269.52	55.5429	0.0857143	2.33783e+11	2.33783e+11	2.00385e+10	1.60989e-05	57.956		2950	1741	1768.82	63.6	0.109565	2.56702e+11
1000	1751	213.81	25.6286	0.0272503	1.67316e+11	1.67316e+11	4.55942e+09	7.22905e-06	26.0246		1500	1751	482.756	35.6143	0.0450175	1.90236e+11	1.90236e+11	8.56394e+09	1.05697e-05	38.051		1950	1751	833.087	47.0143	0.0633788	2.10863e+11	2.10863e+11	1.33643e+10	1.33369e-05	48.0128		2450	1751	1270.82	55.3286	0.0859159	2.33783e+11	2.33783e+11	2.00856e+10	1.60944e-05	57.9399		2950	1751	1770.22	60.1286	0.109865	2.56702e+11
1000	1761	214.352	23.2286	0.0272753	1.67316e+11	1.67316e+11	4.5636e+09	7.22886e-06	26.0239		1500	1761	483.594	35.9143	0.0450802	1.90236e+11	1.90236e+11	8.57587e+09	1.05689e-05	38.0482		1950	1761	834.146	45.3857	0.0634964	2.10863e+11	2.10863e+11	1.3389e+10	1.33349e-05	48.0055		2450	1761	1272.03	52.0714	0.0861162	2.33783e+11	2.33783e+11	2.01325e+10	1.609e-05	57.924		2950	1761	1771.71	63.9429	0.110164	2.56702e+11
1000	1771	214.928	24.6857	0.0272999	1.67316e+11	1.67316e+11	4.56772e+09	7.22867e-06	26.0232		1500	1771	484.383	33.8143	0.0451422	1.90236e+11	1.90236e+11	8.58766e+09	1.05681e-05	38.0453		1950	1771	835.212	45.6857	0.0636129	2.10863e+11	2.10863e+11	1.34136e+10	1.33329e-05	47.9983		2450	1771	1273.4	58.5	0.0863153	2.33783e+11	2.33783e+11	2.0179e+10	1.60856e-05	57.9081		2950	1771	1772.97	54.0857	0.110461	2.56702e+11
1000	1781	215.516	25.2	0.0273242	1.67316e+11	1.67316e+11	4.57178e+09	7.22848e-06	26.0225		1500	1781	485.125	31.8	0.0452035	1.90236e+11	1.90236e+11	8.59933e+09	1.05674e-05	38.0425		1950	1781	836.379	50.0143	0.0637285	2.10863e+11	2.10863e+11	1.3438e+10	1.33309e-05	47.9911		2450	1781	1274.74	57.4286	0.0865132	2.33783e+11	2.33783e+11	2.02253e+10	1.60812e-05	57.8924		2950	1781	1774.52	66.4714	0.110757	2.56702e+11
1000	1791	216.079	24.1286	0.0273481	1.67316e+11	1.67316e+11	4.57578e+09	7.22829e-06	26.0218		1500	1791	486.052	39.7286	0.0452642	1.90236e+11	1.90236e+11	8.61086e+09	1.05666e-05	38.0398		1950	1791	837.415	44.4	0.0638431	2.10863e+11	2.10863e+11	1.34622e+10	1.33289e-05	47.984		2450	1791	1276	54.2571	0.0867098	2.33783e+11	2.33783e+11	2.02712e+10	1.60769e-05	57.8768		2950	1791	1776.17	70.7143	0.111051	2.56702e+11
1000	1801	216.674	25.5	0.0273716	1.67316e+11	1.67316e+11	4.57971e+09	7.22811e-06	26.0212		1500	1801	486.823	33.0429	0.0453241	1.90236e+11	1.90236e+11	8.62227e+09	1.05658e-05	38.037		1950	1801	838.361	40.5429	0.0639568	2.10863e+11	2.10863e+11	1.34861e+10	1.33269e-05	47.977		2450	1801	1277.26	53.8714	0.0869052	2.33783e+11	2.33783e+11	2.03169e+10	1.60726e-05	57.8612		2950	1801	1777.7	65.3571	0.111344	2.56702e+11
1000	1811	217.208	22.8857	0.0273947	1.67316e+11	1.67316e+11	4.58359e+09	7.22792e-06	26.0205		1500	1811	487.669	36.2571	0.0453834	1.90236e+11	1.90236e+11	8.63354e+09	1.05651e-05	38.0343		1950	1811	839.632	54.4714	0.0640695	2.10863e+11	2.10863e+11	1.35099e+10	1.3325e-05	47.97		2450	1811	1278.49	52.8	0.0870995	2.33783e+11	2.33783e+11	2.03623e+10	1.60683e-05	57.8458		2950	1811	1779	55.5857	0.111635	2.56702e+11
1000	1821	217.822	26.3143	0.0274175	1.67316e+11	1.67316e+11	4.5874e+09	7.22775e-06	26.0199		1500	1821	488.509	36	0.045442	1.90236e+11	1.90236e+11	8.64469e+09	1.05643e-05	38.0317		1950	1821	840.666	44.3143	0.0641812	2.10863e+11	2.10863e+11	1.35335e+10	1.33231e-05	47.9631		2450	1821	1279.8	56.2286	0.0872925	2.33783e+11	2.33783e+11	2.04075e+10	1.6064e-05	57.8305		2950	1821	1780.39	59.9143	0.111925	2.56702e+11
1000	1831	218.423	25.7571	0.02744	1.67316e+11	1.67316e+11	4.59116e+09	7.22757e-06	26.0193		1500	1831	489.298	33.8143	0.0455	1.90236e+11	1.90236e+11	8.65572e+09	1.05636e-05	38.029		1950	1831	841.809	48.9857	0.0642921	2.10863e+11	2.10863e+11	1.35568e+10	1.33212e-05	47.9563		2450	1831	1281.11	56.0143	0.0874843	2.33783e+11	2.33783e+11	2.04523e+10	1.60598e-05	57.8153		2950	1831	1781.93	65.6143	0.112214	2.56702e+11
1000	1841	218.956	22.8429	0.0274621	1.67316e+11	1.67316e+11	4.59486e+09	7.2274e-06	26.0186		1500	1841	489.963	28.5	0.0455573	1.90236e+11	1.90236e+11	8.66663e+09	1.05629e-05	38.0264		1950	1841	842.881	45.9429	0.064402	2.10863e+11	2.10863e+11	1.358e+10	1.33193e-05	47.9495		2450	1841	1282.44	56.9571	0.087675	2.33783e+11	2.33783e+11	2.04969e+10	1.60556e-05	57.8002		2950	1841	1783.58	70.7571	0.112501	2.56702e+11
1000	1851	219.607	27.9	0.0274839	1.67316e+11	1.67316e+11	4.59851e+09	7.22723e-06	26.018		1500	1851	490.733	33	0.045614	1.90236e+11	1.90236e+11	8.67741e+09	1.05622e-05	38.0238		1950	1851	843.876	42.6429	0.064511	2.10863e+11	2.10863e+11	1.3603e+10	1.33174e-05	47.9427		2450	1851	1283.79	58.0714	0.0878646	2.33783e+11	2.33783e+11	2.05412e+10	1.60514e-05	57.7851		2950	1851	1785.18	68.7	0.112787	2.56702e+11
1000	1861	220.182	24.6429	0.0275054	1.67316e+11	1.67316e+11	4.6021e+09	7.22706e-06	26.0174		1500	1861	491.385	27.9429	0.04567	1.90236e+11	1.90236e+11	8.68808e+09	1.05615e-05	38.0213		1950	1861	844.851	41.7857	0.0646191	2.10863e+11	2.10863e+11	1.36258e+10	1.33156e-05	47.9361		2450	1861	1285.13	57.3429	0.088053	2.33783e+11	2.33783e+11	2.05852e+10	1.60473e-05	57.7702		2950	1861	1786.78	68.6143	0.113072	2.56702e+11
1000	1871	220.705	22.4143	0.0275265	1.67316e+11	1.67316e+11	4.60564e+09	7.22689e-06	26.0168		1500	1871	492.247	36.9429	0.0457255	1.90236e+11	1.90236e+11	8.69862e+09	1.05608e-05	38.0187		1950	1871	845.827	41.8286	0.0647263	2.10863e+11	2.10863e+11	1.36484e+10	1.33137e-05	47.9294		2450	1871	1286.47	57.2571	0.0882402	2.33783e+11	2.33783e+11	2.0629e+10	1.60432e-05	57.7554		2950	1871	1788.33	66.2143	0.113355	2.56702e+11
1000	1881	221.321	26.4	0.0275473	1.67316e+11	1.67316e+11	4.60912e+09	7.22673e-06	26.0162		1500	1881	493.103	36.6857	0.0457803	1.90236e+11	1.90236e+11	8.70905e+09	1.05601e-05	38.0162		1950	1881	846.973	49.1143	0.0648327	2.10863e+11	2.10863e+11	1.36708e+10	1.33119e-05	47.9229		2450	1881	1287.87	59.9143	0.0884263	2.33783e+11	2.33783e+11	2.06725e+10	1.60391e-05	57.7407		2950	1881	1789.9	67.5	0.113637	2.56702e+11
1000	1891	221.844	22.4143	0.0275678	1.67316e+11	1.67316e+11	4.61255e+09	7.22657e-06	26.0157		1500	1891	493.924	35.1857	0.0458345	1.90236e+11	1.90236e+11	8.71936e+09	1.05594e-05	38.0138		1950	1891	848.094	48.0429	0.0649381	2.10863e+11	2.10863e+11	1.36931e+10	1.33101e-05	47.9164		2450	1891	1289.23	58.5429	0.0886114	2.33783e+11	2.33783e+11	2.07158e+10	1.6035e-05	57.7261		2950	1891	1791.42	65.1	0.113918	2.56702e+11
1000	1901	222.505	28.3286	0.027588	1.67316e+11	1.67316e+11	4.61593e+09	7.22641e-06	26.0151		1500	1901	494.807	37.8429	0.0458881	1.90236e+11	1.90236e+11	8.72956e+09	1.05587e-05	38.0113		1950	1901	849.205	47.6143	0.0650427	2.10863e+11	2.10863e+11	1.37151e+10	1.33083e-05	47.9099		2450	1901	1290.64	60.5571	0.0887953	2.33783e+11	2.33783e+11	2.07588e+10	1.6031e-05	57.7115		2950	1901	1793.08	71.1	0.114197	2.56702e+11
1000	1911	223.092	25.1571	0.0276079	1.67316e+11	1.67316e+11	4.61925e+09	7.22626e-06	26.0145		1500	1911	495.69	37.8429	0.0459412	1.90236e+11	1.90236e+11	8.73965e+09	1.0558e-05	38.0089		1950	1911	850.399	51.1714	0.0651464	2.10863e+11	2.10863e+11	1.3737e+10	1.33065e-05	47.9035		2450	1911	1291.97	57	0.0889781	2.33783e+11	2.33783e+11	2.08015e+10	1.6027e-05	57.6971		2950	1911	1794.68	68.7429	0.114475	2.56702e+11
1000	1921	223.599	7.24286	0.0276275	1.67316e+11	1.67316e+11	4.62253e+09	7.2261e-06	26.014		1500	1921	496.501	34.7571	0.0459936	1.90236e+11	1.90236e+11	8.74963e+09	1.05574e-05	38.0065		1950	1921	851.561	49.8	0.0652493	2.10863e+11	2.10863e+11	1.37587e+10	1.33048e-05	47.8972		2450	1921	1293.37	59.9571	0.0891598	2.33783e+11	2.33783e+11	2.0844e+10	1.6023e-05	57.6827		2950	1921	1796.35	71.3571	0.114752	2.56702e+11
1000	1931	224.208	26.1	0.0276468	1.67316e+11	1.67316e+11	4.62576e+09	7.22595e-06	26.0134		1500	1931	497.373	37.3714	0.0460455	1.90236e+11	1.90236e+11	8.75949e+09	1.05567e-05	38.0041		1950	1931	852.741	50.5714	0.0653514	2.10863e+11	2.10863e+11	1.37802e+10	1.3303e-05	47.8909		2450	1931	1294.72	57.6429	0.0893405	2.33783e+11	2.33783e+11	2.08862e+10	1.6019e-05	57.6685		2950	1931	1797.8	62.1	0.115028	2.56702e+11
1000	1941	224.753	23.3571	0.0276658	1.67316e+11	1.67316e+11	4.62893e+09	7.2258e-06	26.0129		1500	1941	498.24	37.1571	0.0460968	1.90236e+11	1.90236e+11	8.76925e+09	1.05561e-05	38.0018		1950	1941	853.826	46.5	0.0654526	2.10863e+11	2.10863e+11	1.38015e+10	1.33013e-05	47.8846		2450	1941	1296.08	58.2	0.08952	2.33783e+11	2.33783e+11	2.09282e+10	1.60151e-05	57.6543		2950	1941	1799.57	76.1143	0.115302	2.56702e+11
1000	1951	225.357	25.8857	0.0276845	1.67316e+11	1.67316e+11	4.63206e+09	7.22566e-06	26.0124		1500	1951	499.032	33.9429	0.0461475	1.90236e+11	1.90236e+11	8.7789e+09	1.05554e-05	37.9995		1950	1951	854.893	45.7286	0.065553	2.10863e+11	2.10863e+11	1.38227e+10	1.32996e-05	47.8784		2450	1951	1297.43	57.8571	0.0896986	2.33783e+11	2.33783e+11	2.097e+10	1.60112e-05	57.6402		2950	1951	1801.21	70.0714	0.115575	2.56702e+11
1000	1961	225.858	21.4714	0.0277029	1.67316e+11	1.67316e+11	4.63515e+09	7.22551e-06	26.0119		1500	1961	499.864	35.6571	0.0461977	1.90236e+11	1.90236e+11	8.78844e+09	1.05548e-05	37.9972		1950	1961	856.058	49.9286	0.0656526	2.10863e+11	2.10863e+11	1.38437e+10	1.32979e-05	47.8723		2450	1961	1293.79	-51.9	0.089876	2.33783e+11	2.33783e+11	2.10114e+10	1.60073e-05	57.6263		2950	1961	1802.84	69.7714	0.115847	2.56702e+11
1000	1971	226.503	27.6429	0.027721	1.67316e+11	1.67316e+11	4.63818e+09	7.22537e-06	26.0113		1500	1971	500.722	36.7714	0.0462473	1.90236e+11	1.90236e+11	8.79788e+09	1.05542e-05	37.995		1950	1971	857.214	49.5429	0.0657514	2.10863e+11	2.10863e+11	1.38645e+10	1.32962e-05	47.8662		2450	1971	1295.09	55.3714	0.0900525	2.33783e+11	2.33783e+11	2.10527e+10	1.60034e-05	57.6124		2950	1971	1804.47	70.1571	0.116118	2.56702e+11
1000	1981	227.098	25.5	0.0277389	1.67316e+11	1.67316e+11	4.64117e+09	7.22523e-06	26.0108		1500	1981	501.551	35.5286	0.0462963	1.90236e+11	1.90236e+11	8.80722e+09	1.05535e-05	37.9927		1950	1981	858.334	48	0.0658494	2.10863e+11	2.10863e+11	1.38852e+10	1.32945e-05	47.8602		2450	1981	1296.32	53.1	0.0902279	2.33783e+11	2.33783e+11	2.10937e+10	1.59996e-05	57.5985		2950	1981	1806.12	70.8	0.116387	2.56702e+11
1000	1991	227.475	16.1571	0.0277565	1.67316e+11	1.67316e+11	4.64412e+09	7.22509e-06	26.0103		1500	1991	502.388	35.8714	0.0463449	1.90236e+11	1.90236e+11	8.81645e+09	1.05529e-05	37.9905		1950	1991	859.491	49.5857	0.0659465	2.10863e+11	2.10863e+11	1.39057e+10	1.32928e-05	47.8542		2450	1991	1297.65	57	0.0904022	2.33783e+11	2.33783e+11	2.11345e+10	1.59958e-05	57.5848		2950	1991	1807.73	68.6571	0.116655	2.56702e+11
1000	2001	228.018	23.2714	0.0277739	1.67316e+11	1.67316e+11	4.64702e+09	7.22496e-06	26.0099		1500	2001	503.223	35.7857	0.0463929	1.90236e+11	1.90236e+11	8.82558e+09	1.05523e-05	37.9883		1950	2001	860.671	50.5714	0.0660429	2.10863e+11	2.10863e+11	1.3926e+10	1.32912e-05	47.8483		2450	2001	1298.81	49.6286	0.0905756	2.33783e+11	2.33783e+11	2.1175e+10	1.5992e-05	57.5712		2950	2001	1809.31	67.8857	0.116922	2.56702e+11
1000	2011	228.579	24.0429	0.0277909	1.67316e+11	1.67316e+11	4.64988e+09	7.22483e-06	26.0094		1500	2011	504.061	35.9143	0.0464404	1.90236e+11	1.90236e+11	8.83462e+09	1.05517e-05	37.9862		1950	2011	861.851	50.5714	0.0661386	2.10863e+11	2.10863e+11	1.39462e+10	1.32895e-05	47.8424		2450	2011	1300.19	58.9286	0.090748	2.33783e+11	2.33783e+11	2.12153e+10	1.59882e-05	57.5576		2950	2011	1810.96	70.5857	0.117188	2.56702e+11
1000	2021	229.047	20.0571	0.0278078	1.67316e+11	1.67316e+11	4.65269e+09	7.22469e-06	26.0089		1500	2021	505.052	42.4714	0.0464873	1.90236e+11	1.90236e+11	8.84355e+09	1.05511e-05	37.984		1950	2021	862.99	48.8143	0.0662334	2.10863e+11	2.10863e+11	1.39662e+10	1.32879e-05	47.8365		2450	2021	1301.49	55.6714	0.0909193	2.33783e+11	2.33783e+11	2.12554e+10	1.59845e-05	57.5442		2950	2021	1823.86	184.343	0.117453	2.56702e+11
1000	2031	229.641	25.4571	0.0278243	1.67316e+11	1.67316e+11	4.65547e+09	7.22456e-06	26.0084		1500	2031	505.806	32.3143	0.0465338	1.90236e+11	1.90236e+11	8.85239e+09	1.05505e-05	37.9819		1950	2031	864.105	47.7857	0.0663275	2.10863e+11	2.10863e+11	1.3986e+10	1.32863e-05	47.8308		2450	2031	1302.88	59.5714	0.0910897	2.33783e+11	2.33783e+11	2.12952e+10	1.59808e-05	57.5308		2950	2031	1825.37	64.4571	0.117716	2.56702e+11
1000	2041	230.259	26.4857	0.0278407	1.67316e+11	1.67316e+11	4.6582e+09	7.22444e-06	26.008		1500	2041	506.718	39.0857	0.0465797	1.90236e+11	1.90236e+11	8.86113e+09	1.055e-05	37.9798		1950	2041	865.279	50.3143	0.0664209	2.10863e+11	2.10863e+11	1.40057e+10	1.32847e-05	47.825		2450	2041	1304.19	56.1857	0.0912591	2.33783e+11	2.33783e+11	2.13348e+10	1.59771e-05	57.5175		2950	2041	1826.79	61.0714	0.117978	2.56702e+11
1000	2051	230.85	25.3286	0.0278567	1.67316e+11	1.67316e+11	4.66089e+09	7.22431e-06	26.0075		1500	2051	507.573	36.6429	0.0466251	1.90236e+11	1.90236e+11	8.86977e+09	1.05494e-05	37.9778		1950	2051	866.514	52.9286	0.0665135	2.10863e+11	2.10863e+11	1.40252e+10	1.32831e-05	47.8193		2450	2051	1305.42	52.6286	0.0914275	2.33783e+11	2.33783e+11	2.13742e+10	1.59734e-05	57.5043		2950	2051	1828.17	59.1857	0.11824	2.56702e+11
1000	2061	231.379	22.6714	0.0278726	1.67316e+11	1.67316e+11	4.66353e+09	7.22419e-06	26.0071		1500	2061	508.477	38.7429	0.0466701	1.90236e+11	1.90236e+11	8.87832e+09	1.05488e-05	37.9757		1950	2061	867.648	48.6	0.0666054	2.10863e+11	2.10863e+11	1.40446e+10	1.32816e-05	47.8137		2450	2061	1306.42	43.0286	0.091595	2.33783e+11	2.33783e+11	2.14133e+10	1.59698e-05	57.4912		2950	2061	1829.52	57.8143	0.1185	2.56702e+11
1000	2071	231.891	21.9429	0.0278882	1.67316e+11	1.67316e+11	4.66614e+09	7.22407e-06	26.0066		1500	2071	509.41	39.9857	0.0467146	1.90236e+11	1.90236e+11	8.88678e+09	1.05483e-05	37.9737		1950	2071	868.791	48.9857	0.0666965	2.10863e+11	2.10863e+11	1.40638e+10	1.328e-05	47.8081		2450	2071	1307.67	53.4857	0.0917615	2.33783e+11	2.33783e+11	2.14522e+10	1.59661e-05	57.4781		2950	2071	1831	63.3429	0.118759	2.56702e+11
1000	2081	232.374	20.7	0.0279035	1.67316e+11	1.67316e+11	4.66871e+09	7.22395e-06	26.0062		1500	2081	510.25	36	0.0467585	1.90236e+11	1.90236e+11	8.89514e+09	1.05477e-05	37.9717		1950	2081	870.021	52.7143	0.0667869	2.10863e+11	2.10863e+11	1.40829e+10	1.32785e-05	47.8025		2450	2081	1308.99	56.7	0.091927	2.33783e+11	2.33783e+11	2.14909e+10	1.59625e-05	57.4651		2950	2081	1832.41	60.4714	0.119016	2.56702e+11
1000	2091	232.941	24.3	0.0279186	1.67316e+11	1.67316e+11	4.67125e+09	7.22383e-06	26.0058		1500	2091	511.108	36.7714	0.046802	1.90236e+11	1.90236e+11	8.90342e+09	1.05471e-05	37.9697		1950	2091	871.136	47.7857	0.0668766	2.10863e+11	2.10863e+11	1.41018e+10	1.32769e-05	47.797		2450	2091	1310.33	57.6	0.0920916	2.33783e+11	2.33783e+11	2.15294e+10	1.5959e-05	57.4522		2950	2091	1833.91	64.4571	0.119273	2.56702e+11
1000	2101	233.715	33.1714	0.0279335	1.67316e+11	1.67316e+11	4.67374e+09	7.22371e-06	26.0054		1500	2101	511.999	38.1857	0.046845	1.90236e+11	1.90236e+11	8.9116e+09	1.05466e-05	37.9678		1950	2101	872.284	49.2	0.0669656	2.10863e+11	2.10863e+11	1.41206e+10	1.32754e-05	47.7915		2450	2101	1311.8	62.7429	0.0922553	2.33783e+11	2.33783e+11	2.15677e+10	1.59554e-05	57.4394		2950	2101	1835.4	63.8571	0.119528	2.56702e+11
1000	2111	234.337	26.6571	0.0279482	1.67316e+11	1.67316e+11	4.67619e+09	7.2236e-06	26.0049		1500	2111	512.856	36.7286	0.0468876	1.90236e+11	1.90236e+11	8.9197e+09	1.05461e-05	37.9658		1950	2111	876.259	56.7857	0.0670538	2.10863e+11	2.10863e+11	1.41392e+10	1.32739e-05	47.7861		2450	2111	1313.13	57.2571	0.092418	2.33783e+11	2.33783e+11	2.16057e+10	1.59519e-05	57.4267		2950	2111	1836.91	64.7571	0.119783	2.56702e+11
1000	2121	234.892	23.7857	0.0279627	1.67316e+11	1.67316e+11	4.67861e+09	7.22348e-06	26.0045		1500	2121	513.826	41.5714	0.0469297	1.90236e+11	1.90236e+11	8.9277e+09	1.05455e-05	37.9639		1950	2121	877.394	48.6429	0.0671414	2.10863e+11	2.10863e+11	1.41576e+10	1.32724e-05	47.7807		2450	2121	1314.57	61.7143	0.0925799	2.33783e+11	2.33783e+11	2.16436e+10	1.59483e-05	57.414		2950	2121	1838.41	64.1571	0.120036	2.56702e+11
1000	2131	235.483	25.3286	0.0279769	1.67316e+11	1.67316e+11	4.681e+09	7.22337e-06	26.0041		1500	2131	514.641	34.9286	0.0469713	1.90236e+11	1.90236e+11	8.93563e+09	1.0545e-05	37.962		1950	2131	878.453	45.3857	0.0672283	2.10863e+11	2.10863e+11	1.4176e+10	1.32709e-05	47.7754		2450	2131	1315.96	59.5286	0.0927408	2.33783e+11	2.33783e+11	2.16812e+10	1.59448e-05	57.4014		2950	2131	1839.67	53.7857	0.120289	2.56702e+11
1000	2141	236.054	24.4714	0.0279909	1.67316e+11	1.67316e+11	4.68334e+09	7.22326e-06	26.0037		1500	2141	515.591	40.7143	0.0470125	1.90236e+11	1.90236e+11	8.94346e+09	1.05445e-05	37.9602		1950	2141	879.423	41.5714	0.0673145	2.10863e+11	2.10863e+11	1.41941e+10	1.32695e-05	47.7701		2450	2141	1317.27	55.9714	0.0929008	2.33783e+11	2.33783e+11	2.17186e+10	1.59414e-05	57.3889		2950	2141	1841.46	76.8857	0.12054	2.56702e+11
1000	2151	236.637	24.9857	0.0280048	1.67316e+11	1.67316e+11	4.68565e+09	7.22315e-06	26.0034		1500	2151	515.389	-2.88571	0.0470533	1.90236e+11	1.90236e+11	8.95121e+09	1.0544e-05	37.9583		1950	2151	880.23	34.5857	0.0674	2.10863e+11	2.10863e+11	1.42122e+10	1.3268e-05	47.7649		2450	2151	1318.62	57.6857	0.0930599	2.33783e+11	2.33783e+11	2.17558e+10	1.59379e-05	57.3765		2950	2151	1842.97	64.5429	0.12079	2.56702e+11
1000	2161	237.14	21.5571	0.0280184	1.67316e+11	1.67316e+11	4.68793e+09	7.22305e-06	26.003		1500	2161	516.252	36.9857	0.0470936	1.90236e+11	1.90236e+11	8.95888e+09	1.05435e-05	37.9565		1950	2161	881.16	39.8571	0.0674848	2.10863e+11	2.10863e+11	1.42301e+10	1.32666e-05	47.7597		2450	2161	1320	59.4429	0.0932182	2.33783e+11	2.33783e+11	2.17928e+10	1.59345e-05	57.3642		2950	2161	1844.52	66.7714	0.121039	2.56702e+11
1000	2171	237.712	24.5143	0.0280318	1.67316e+11	1.67316e+11	4.69017e+09	7.22294e-06	26.0026		1500	2171	517.112	36.8571	0.0471334	1.90236e+11	1.90236e+11	8.96646e+09	1.0543e-05	37.9547		1950	2171	882.09	39.8571	0.067569	2.10863e+11	2.10863e+11	1.42478e+10	1.32651e-05	47.7545		2450	2171	1321.38	59.0143	0.0933755	2.33783e+11	2.33783e+11	2.18296e+10	1.59311e-05	57.3519		2950	2171	1846.12	68.4	0.121287	2.56702e+11
1000	2181	238.137	18.2143	0.028045	1.67316e+11	1.67316e+11	4.69238e+09	7.22284e-06	26.0022		1500	2181	517.996	37.8857	0.0471729	1.90236e+11	1.90236e+11	8.97396e+09	1.05425e-05	37.9529		1950	2181	883.127	44.4429	0.0676525	2.10863e+11	2.10863e+11	1.42654e+10	1.32637e-05	47.7494		2450	2181	1322.73	57.8143	0.093532	2.33783e+11	2.33783e+11	2.18661e+10	1.59277e-05	57.3397		2950	2181	1847.68	66.8143	0.121534	2.56702e+11
1000	2191	238.669	22.8	0.028058	1.67316e+11	1.67316e+11	4.69456e+09	7.22274e-06	26.0019		1500	2191	518.778	33.5143	0.0472119	1.90236e+11	1.90236e+11	8.98139e+09	1.0542e-05	37.9511		1950	2191	884.184	45.3	0.0677354	2.10863e+11	2.10863e+11	1.42829e+10	1.32623e-05	47.7443		2450	2191	1324.13	60.2143	0.0936876	2.33783e+11	2.33783e+11	2.19025e+10	1.59243e-05	57.3275		2950	2191	1849.2	65.1857	0.12178	2.56702e+11
1000	2201	239.223	23.7429	0.0280708	1.67316e+11	1.67316e+11	4.6967e+09	7.22264e-06	26.0015		1500	2201	519.656	37.6286	0.0472505	1.90236e+11	1.90236e+11	8.98873e+09	1.05415e-05	37.9494		1950	2201	885.251	45.7286	0.0678176	2.10863e+11	2.10863e+11	1.43002e+10	1.32609e-05	47.7393		2450	2201	1325.56	61.1571	0.0938423	2.33783e+11	2.33783e+11	2.19387e+10	1.5921e-05	57.3155		2950	2201	1850.74	66.0429	0.122025	2.56702e+11
1000	2211	239.845	26.6571	0.0280834	1.67316e+11	1.67316e+11	4.69881e+09	7.22254e-06	26.0011		1500	2211	520.416	32.5714	0.0472886	1.90236e+11	1.90236e+11	8.99599e+09	1.0541e-05	37.9476		1950	2211	886.29	44.5286	0.0678992	2.10863e+11	2.10863e+11	1.43174e+10	1.32595e-05	47.7343		2450	2211	1326.95	59.6143	0.0939962	2.33783e+11	2.33783e+11	2.19747e+10	1.59176e-05	57.3035		2950	2211	1852.32	67.5429	0.122269	2.56702e+11
1000	2221	240.405	24	0.0280958	1.67316e+11	1.67316e+11	4.70089e+09	7.22244e-06	26.0008		1500	2221	521.201	33.6429	0.0473264	1.90236e+11	1.90236e+11	9.00317e+09	1.05405e-05	37.9459		1950	2221	887.367	46.1571	0.0679802	2.10863e+11	2.10863e+11	1.43345e+10	1.32581e-05	47.7293		2450	2221	1328.39	61.7571	0.0941492	2.33783e+11	2.33783e+11	2.20105e+10	1.59143e-05	57.2916		2950	2221	1847.76	-65.1571	0.122512	2.56702e+11
1000	2231	241.012	26.0143	0.0281081	1.67316e+11	1.67316e+11	4.70294e+09	7.22235e-06	26.0005		1500	2231	522.07	37.2429	0.0473638	1.90236e+11	1.90236e+11	9.01028e+09	1.05401e-05	37.9442		1950	2231	888.474	47.4429	0.0680605	2.10863e+11	2.10863e+11	1.43514e+10	1.32568e-05	47.7244		2450	2231	1329.73	57.3	0.0943014	2.33783e+11	2.33783e+11	2.2046e+10	1.5911e-05	57.2797		2950	2231	1849.26	64.5857	0.122753	2.56702e+11
1000	2241	241.6	25.2	0.0281202	1.67316e+11	1.67316e+11	4.70496e+09	7.22225e-06	26.0001		1500	2241	522.81	31.7143	0.0474007	1.90236e+11	1.90236e+11	9.01731e+09	1.05396e-05	37.9425		1950	2241	889.553	46.2429	0.0681402	2.10863e+11	2.10863e+11	1.43683e+10	1.32554e-05	47.7195		2450	2241	1331.27	66.1286	0.0944528	2.33783e+11	2.33783e+11	2.20814e+10	1.59078e-05	57.2679		2950	2241	1850.69	61.1143	0.122994	2.56702e+11
1000	2251	242.229	26.9571	0.028132	1.67316e+11	1.67316e+11	4.70695e+09	7.22216e-06	25.9998		1500	2251	523.582	33.0857	0.0474373	1.90236e+11	1.90236e+11	9.02427e+09	1.05391e-05	37.9409		1950	2251	890.679	48.2571	0.0682192	2.10863e+11	2.10863e+11	1.43849e+10	1.32541e-05	47.7147		2450	2251	1332.58	56.1857	0.0946033	2.33783e+11	2.33783e+11	2.21166e+10	1.59045e-05	57.2562		2950	2251	1852.01	56.5714	0.123234	2.56702e+11
1000	2261	242.874	27.6429	0.0281437	1.67316e+11	1.67316e+11	4.70891e+09	7.22207e-06	25.9994		1500	2261	524.337	32.3571	0.0474735	1.90236e+11	1.90236e+11	9.03115e+09	1.05387e-05	37.9392		1950	2261	891.749	45.8571	0.0682977	2.10863e+11	2.10863e+11	1.44015e+10	1.32527e-05	47.7099		2450	2261	1334.1	64.8857	0.094753	2.33783e+11	2.33783e+11	2.21516e+10	1.59013e-05	57.2446		2950	2261	1853.69	72.1286	0.123473	2.56702e+11
1000	2271	243.442	24.3429	0.0281553	1.67316e+11	1.67316e+11	4.71084e+09	7.22198e-06	25.9991		1500	2271	525.475	48.7714	0.0475092	1.90236e+11	1.90236e+11	9.03795e+09	1.05382e-05	37.9376		1950	2271	892.815	45.6857	0.0683755	2.10863e+11	2.10863e+11	1.44179e+10	1.32514e-05	47.7051		2450	2271	1335.39	55.2429	0.0949019	2.33783e+11	2.33783e+11	2.21864e+10	1.58981e-05	57.233		2950	2271	1854.99	55.7143	0.123711	2.56702e+11
1000	2281	244.031	25.2429	0.0281666	1.67316e+11	1.67316e+11	4.71274e+09	7.22189e-06	25.9988		1500	2281	526.274	34.2429	0.0475446	1.90236e+11	1.90236e+11	9.04469e+09	1.05378e-05	37.936		1950	2281	893.894	46.2429	0.0684528	2.10863e+11	2.10863e+11	1.44342e+10	1.32501e-05	47.7004		2450	2281	1336.81	61.1571	0.09505	2.33783e+11	2.33783e+11	2.2221e+10	1.58949e-05	57.2215		2950	2281	1856.56	67.1143	0.123948	2.56702e+11
1000	2291	244.574	23.2714	0.0281778	1.67316e+11	1.67316e+11	4.71461e+09	7.2218e-06	25.9985		1500	2291	527.199	39.6429	0.0475796	1.90236e+11	1.90236e+11	9.05135e+09	1.05373e-05	37.9344		1950	2291	894.96	45.6857	0.0685294	2.10863e+11	2.10863e+11	1.44503e+10	1.32488e-05	47.6957		2450	2291	1338.23	60.8571	0.0951973	2.33783e+11	2.33783e+11	2.22555e+10	1.58917e-05	57.2101		2950	2291	1858.07	64.8857	0.124184	2.56702e+11
1000	2301	245.205	27.0429	0.0281888	1.67316e+11	1.67316e+11	4.71645e+09	7.22172e-06	25.9982		1500	2301	527.974	33.2143	0.0476143	1.90236e+11	1.90236e+11	9.05794e+09	1.05369e-05	37.9328		1950	2301	896.016	45.2571	0.0686055	2.10863e+11	2.10863e+11	1.44664e+10	1.32475e-05	47.6911		2450	2301	1346.28	114.929	0.0953438	2.33783e+11	2.33783e+11	2.22897e+10	1.58885e-05	57.1987		2950	2301	1859.56	63.7286	0.124419	2.56702e+11
1000	2311	245.84	27.2143	0.0281997	1.67316e+11	1.67316e+11	4.71827e+09	7.22163e-06	25.9979		1500	2311	528.884	39	0.0476486	1.90236e+11	1.90236e+11	9.06446e+09	1.05365e-05	37.9313		1950	2311	897.052	44.4	0.068681	2.10863e+11	2.10863e+11	1.44823e+10	1.32462e-05	47.6864		2450	2311	1347.56	54.7714	0.0954895	2.33783e+11	2.33783e+11	2.23238e+10	1.58854e-05	57.1874		2950	2311	1860.92	58.2	0.124653	2.56702e+11
1000	2321	246.362	22.3714	0.0282104	1.67316e+11	1.67316e+11	4.72006e+09	7.22155e-06	25.9976		1500	2321	529.655	33.0429	0.0476825	1.90236e+11	1.90236e+11	9.07091e+09	1.0536e-05	37.9297		1950	2321	898.154	47.2286	0.0687559	2.10863e+11	2.10863e+11	1.44981e+10	1.3245e-05	47.6819		2450	2321	1348.78	52.2857	0.0956344	2.33783e+11	2.33783e+11	2.23577e+10	1.58823e-05	57.1762		2950	2321	1862.14	52.2857	0.124886	2.56702e+11
1000	2331	246.969	26.0143	0.0282209	1.67316e+11	1.67316e+11	4.72182e+09	7.22147e-06	25.9973		1500	2331	530.43	33.2143	0.047716	1.90236e+11	1.90236e+11	9.07729e+09	1.05356e-05	37.9282		1950	2331	899.249	46.9286	0.0688302	2.10863e+11	2.10863e+11	1.45138e+10	1.32437e-05	47.6773		2450	2331	1350.07	55.5429	0.0957785	2.33783e+11	2.33783e+11	2.23913e+10	1.58792e-05	57.165		2950	2331	1863.62	63.3429	0.125118	2.56702e+11
1000	2341	247.484	22.0714	0.0282313	1.67316e+11	1.67316e+11	4.72355e+09	7.22139e-06	25.997		1500	2341	531.132	30.0857	0.0477492	1.90236e+11	1.90236e+11	9.0836e+09	1.05352e-05	37.9267		1950	2341	900.426	50.4429	0.068904	2.10863e+11	2.10863e+11	1.45293e+10	1.32424e-05	47.6728		2450	2341	1351.31	53.0143	0.0959219	2.33783e+11	2.33783e+11	2.24249e+10	1.58761e-05	57.1539		2950	2341	1865.24	69.7286	0.125349	2.56702e+11
1000	2351	248.135	27.9	0.0282415	1.67316e+11	1.67316e+11	4.72526e+09	7.22131e-06	25.9967		1500	2351	532.01	37.6286	0.047782	1.90236e+11	1.90236e+11	9.08985e+09	1.05348e-05	37.9252		1950	2351	901.551	48.2143	0.0689771	2.10863e+11	2.10863e+11	1.45447e+10	1.32412e-05	47.6683		2450	2351	1352.6	55.4571	0.0960645	2.33783e+11	2.33783e+11	2.24582e+10	1.5873e-05	57.1428		2950	2351	1866.8	66.5571	0.12558	2.56702e+11
1000	2361	248.717	24.9429	0.0282516	1.67316e+11	1.67316e+11	4.72695e+09	7.22123e-06	25.9964		1500	2361	532.879	37.2429	0.0478145	1.90236e+11	1.90236e+11	9.09603e+09	1.05344e-05	37.9238		1950	2361	902.638	46.5857	0.0690498	2.10863e+11	2.10863e+11	1.45601e+10	1.324e-05	47.6639		2450	2361	1353.82	52.2	0.0962063	2.33783e+11	2.33783e+11	2.24914e+10	1.587e-05	57.1318		2950	2361	1868.4	68.6571	0.125809	2.56702e+11
1000	2371	249.265	23.4857	0.0282615	1.67316e+11	1.67316e+11	4.72861e+09	7.22115e-06	25.9961		1500	2371	533.76	37.7571	0.0478467	1.90236e+11	1.90236e+11	9.10214e+09	1.0534e-05	37.9223		1950	2371	903.814	50.4	0.0691218	2.10863e+11	2.10863e+11	1.45753e+10	1.32388e-05	47.6595		2450	2371	1355.18	58.0286	0.0963473	2.33783e+11	2.33783e+11	2.25243e+10	1.58669e-05	57.1209		2950	2371	1869.93	65.6143	0.126037	2.56702e+11
1000	2381	249.891	26.8286	0.0282713	1.67316e+11	1.67316e+11	4.73024e+09	7.22107e-06	25.9959		1500	2381	534.66	38.5714	0.0478784	1.90236e+11	1.90236e+11	9.10819e+09	1.05336e-05	37.9209		1950	2381	904.92	47.4	0.0691934	2.10863e+11	2.10863e+11	1.45903e+10	1.32375e-05	47.6551		2450	2381	1356.39	52.0714	0.0964877	2.33783e+11	2.33783e+11	2.25571e+10	1.58639e-05	57.1101		2950	2381	1871.42	63.9	0.126265	2.56702e+11
1000	2391	250.488	25.5857	0.0282809	1.67316e+11	1.67316e+11	4.73185e+09	7.221e-06	25.9956		1500	2391	535.602	40.3714	0.0479099	1.90236e+11	1.90236e+11	9.11418e+09	1.05332e-05	37.9194		1950	2391	906.004	46.4571	0.0692643	2.10863e+11	2.10863e+11	1.46053e+10	1.32363e-05	47.6508		2450	2391	1357.64	53.4857	0.0966272	2.33783e+11	2.33783e+11	2.25898e+10	1.58609e-05	57.0993		2950	2391	1872.99	67.1143	0.126492	2.56702e+11
1000	2401	251.138	27.8571	0.0282904	1.67316e+11	1.67316e+11	4.73344e+09	7.22092e-06	25.9953		1500	2401	536.494	38.2286	0.047941	1.90236e+11	1.90236e+11	9.1201e+09	1.05328e-05	37.918		1950	2401	907.11	47.4	0.0693348	2.10863e+11	2.10863e+11	1.46202e+10	1.32351e-05	47.6465		2450	2401	1358.85	51.7714	0.0967661	2.33783e+11	2.33783e+11	2.26222e+10	1.58579e-05	57.0885		2950	2401	1874.56	67.5857	0.126717	2.56702e+11
1000	2411	251.759	26.6143	0.0282997	1.67316e+11	1.67316e+11	4.735e+09	7.22085e-06	25.9951		1500	2411	537.415	39.4714	0.0479718	1.90236e+11	1.90236e+11	9.12595e+09	1.05324e-05	37.9166		1950	2411	908.27	49.7143	0.0694047	2.10863e+11	2.10863e+11	1.46349e+10	1.3234e-05	47.6422		2450	2411	1360.13	55.2	0.0969042	2.33783e+11	2.33783e+11	2.26545e+10	1.5855e-05	57.0779		2950	2411	1876.16	68.5286	0.126942	2.56702e+11
1000	2421	252.328	24.3857	0.0283089	1.67316e+11	1.67316e+11	4.73654e+09	7.22078e-06	25.9948		1500	2421	538.288	37.4143	0.0480023	1.90236e+11	1.90236e+11	9.13175e+09	1.0532e-05	37.9152		1950	2421	909.35	46.2857	0.069474	2.10863e+11	2.10863e+11	1.46495e+10	1.32328e-05	47.638		2450	2421	1361.4	54.2571	0.0970415	2.33783e+11	2.33783e+11	2.26866e+10	1.5852e-05	57.0672		2950	2421	1877.7	65.9143	0.127166	2.56702e+11
1000	2431	252.919	25.3286	0.028318	1.67316e+11	1.67316e+11	4.73806e+09	7.22071e-06	25.9946		1500	2431	539.235	40.5857	0.0480324	1.90236e+11	1.90236e+11	9.13748e+09	1.05316e-05	37.9139		1950	2431	910.517	50.0143	0.0695429	2.10863e+11	2.10863e+11	1.4664e+10	1.32316e-05	47.6338		2450	2431	1362.67	54.5143	0.0971782	2.33783e+11	2.33783e+11	2.27186e+10	1.58491e-05	57.0567		2950	2431	1879.33	69.7714	0.127389	2.56702e+11
1000	2441	253.524	25.9286	0.0283269	1.67316e+11	1.67316e+11	4.73955e+09	7.22064e-06	25.9943		1500	2441	540.065	35.5714	0.0480622	1.90236e+11	1.90236e+11	9.14315e+09	1.05313e-05	37.9125		1950	2441	911.602	46.5	0.0696112	2.10863e+11	2.10863e+11	1.46784e+10	1.32305e-05	47.6296		2450	2441	1364.02	57.9	0.0973141	2.33783e+11	2.33783e+11	2.27503e+10	1.58462e-05	57.0462		2950	2441	1880.9	67.2	0.127611	2.56702e+11
1000	2451	254.111	25.1571	0.0283357	1.67316e+11	1.67316e+11	4.74102e+09	7.22057e-06	25.9941		1500	2451	540.959	38.3143	0.0480917	1.90236e+11	1.90236e+11	9.14877e+09	1.05309e-05	37.9112		1950	2451	912.733	48.4714	0.069679	2.10863e+11	2.10863e+11	1.46927e+10	1.32293e-05	47.6255		2450	2451	1365.42	59.7429	0.0974493	2.33783e+11	2.33783e+11	2.27819e+10	1.58433e-05	57.0358		2950	2451	1882.48	67.8857	0.127833	2.56702e+11
1000	2461	254.753	27.5143	0.0283443	1.67316e+11	1.67316e+11	4.74247e+09	7.2205e-06	25.9938		1500	2461	541.765	34.5429	0.0481209	1.90236e+11	1.90236e+11	9.15432e+09	1.05305e-05	37.9099		1950	2461	910.303	-34.7143	0.0697463	2.10863e+11	2.10863e+11	1.47069e+10	1.32282e-05	47.6214		2450	2461	1366.75	57.0429	0.0975838	2.33783e+11	2.33783e+11	2.28134e+10	1.58404e-05	57.0254		2950	2461	1884.08	68.6143	0.128053	2.56702e+11
1000	2471	255.306	23.7	0.0283529	1.67316e+11	1.67316e+11	4.7439e+09	7.22044e-06	25.9936		1500	2471	542.638	37.4143	0.0481498	1.90236e+11	1.90236e+11	9.15981e+09	1.05302e-05	37.9086		1950	2471	911.454	49.3286	0.0698131	2.10863e+11	2.10863e+11	1.4721e+10	1.3227e-05	47.6173		2450	2471	1368.09	57.3429	0.0977176	2.33783e+11	2.33783e+11	2.28447e+10	1.58375e-05	57.0151		2950	2471	1885.68	68.7429	0.128273	2.56702e+11
1000	2481	255.902	25.5429	0.0283613	1.67316e+11	1.67316e+11	4.74531e+09	7.22037e-06	25.9933		1500	2481	543.556	39.3429	0.0481784	1.90236e+11	1.90236e+11	9.16525e+09	1.05298e-05	37.9073		1950	2481	912.471	43.5857	0.0698794	2.10863e+11	2.10863e+11	1.4735e+10	1.32259e-05	47.6133		2450	2481	1369.46	58.8429	0.0978507	2.33783e+11	2.33783e+11	2.28758e+10	1.58347e-05	57.0048		2950	2481	1887.2	65.1429	0.128492	2.56702e+11
1000	2491	256.527	26.7857	0.0283696	1.67316e+11	1.67316e+11	4.74669e+09	7.22031e-06	25.9931		1500	2491	544.463	38.8714	0.0482067	1.90236e+11	1.90236e+11	9.17063e+09	1.05294e-05	37.906		1950	2491	913.491	43.7143	0.0699452	2.10863e+11	2.10863e+11	1.47489e+10	1.32248e-05	47.6093		2450	2491	1370.79	56.9143	0.0979831	2.33783e+11	2.33783e+11	2.29067e+10	1.58318e-05	56.9946		2950	2491	1888.94	74.4857	0.128709	2.56702e+11
1000	2501	257.162	27.2143	0.0283777	1.67316e+11	1.67316e+11	4.74806e+09	7.22024e-06	25.9929		1500	2501	545.363	38.5714	0.0482346	1.90236e+11	1.90236e+11	9.17595e+09	1.05291e-05	37.9047		1950	2501	914.686	51.2143	0.0700104	2.10863e+11	2.10863e+11	1.47626e+10	1.32237e-05	47.6053		2450	2501	1372.2	60.4286	0.0981148	2.33783e+11	2.33783e+11	2.29375e+10	1.5829e-05	56.9844		2950	2501	1890.45	64.5	0.128927	2.56702e+11
1000	2511	257.76	25.6286	0.0283858	1.67316e+11	1.67316e+11	4.7494e+09	7.22018e-06	25.9926		1500	2511	546.322	41.1	0.0482623	1.90236e+11	1.90236e+11	9.18122e+09	1.05287e-05	37.9035		1950	2511	915.728	44.6571	0.0700752	2.10863e+11	2.10863e+11	1.47763e+10	1.32226e-05	47.6014		2450	2511	1373.39	50.9143	0.0982459	2.33783e+11	2.33783e+11	2.29682e+10	1.58262e-05	56.9743		2950	2511	1892.05	68.6143	0.129143	2.56702e+11
1000	2521	258.342	24.9429	0.0283937	1.67316e+11	1.67316e+11	4.75073e+09	7.22012e-06	25.9924		1500	2521	547.203	37.7571	0.0482897	1.90236e+11	1.90236e+11	9.18643e+09	1.05284e-05	37.9022		1950	2521	916.609	37.7571	0.0701396	2.10863e+11	2.10863e+11	1.47898e+10	1.32215e-05	47.5974		2450	2521	1374.88	64.0286	0.0983762	2.33783e+11	2.33783e+11	2.29986e+10	1.58234e-05	56.9643		2950	2521	1893.63	67.9714	0.129358	2.56702e+11
[truncated: 107 more rows]
[truncated: 54 more columns]

## Sheet: Flux data AaV 15 min
TMP (Pa)	Time (s)	weight	J measured (LMH)	ω (kg/m2)	α (eq)	α	Rc model (1/m)	Jmodel (m/s)	Jmodel (LMH)		TMP (Pa)	Time (s)	weight	J measured (LMH)	ω (kg/m2)	α (eq)	α	Rc model (1/m)	Jmodel (m/s)	Jmodel (LMH)		TMP (Pa)	Time (s)	weight	J measured (LMH)	ω (kg/m2)	α (eq)	α	Rc model (1/m)	Jmodel (m/s)	Jmodel (LMH)		TMP (Pa)	Time (s)	weight	J measured (LMH)	ω (kg/m2)	α (eq)	α	Rc model (1/m)	Jmodel (m/s)	Jmodel (LMH)		TMP (Pa)	Time (s)	weight	J measured (LMH)	ω (kg/m2)	α (eq)
[truncated: 63 more rows]
[truncated: 54 more columns]

[truncated: 5 more sheets: Aalborg Vest CAS, Bjerringbro MBR, Bjerringbro CAS, Lundtofte MBR, Lundtofte CAS]
